# Supplementary material for: Chiral derivatives of 1,2-benzenedisulfonimide as efficient Brønsted acid catalysts in the Strecker reaction
Source: Royal Society of Chemistry journal article supplement (doi:10.1039/c4ob00552j), 2014-01-01
Supplement: c4ob00552j1.pdf [file c4ob00552j1.pdf]

**Chiral Derivatives of 1,2-Benzenedisulfonimide as efficient Brønsted acid catalysts in Strecker reaction.**

Margherita Barbero, Silvano Cadamuro, Stefano Dughera,\* Roberta Torregrossa

*Dipartimento di Chimica, Università di Torino, C.so Massimo d'Azeglio 48, 10125 Torino, Italy.*

**Electronic Supplementary Information (ESI)**

1. **Synthesis of anilines 5 and their physical and spectral data. Pag 2**
2. **Synthesis of diodonitro derivatives 7 and their physical and spectral data. Pag 2-3**
3. **Synthesis of 4-nitro-3,6-bis(*o*-tolyl)-*o*-xylene (15) and its physical and spectral data. Pag 3**
4. **Synthesis of diiodoanilines 8 and their physical and spectral data. Pag 4**
5. **Synthesis of 2,5-bis(*o*-tolyl)-3,4-dimethylaniline (16) and its physical and spectral data. Pag 4-5**
6. **Synthesis of diiodoisatins 10 and their physical and spectral data. Pag 5**
7. **Synthesis of 5,6-dimethyl-4,7-bis(*o*-tolyl)isatin (11b) and its physical and spectral data. Pag 5-6**
8. **Synthesis of diarylisatins 11 and their physical and spectral data. Pag 6-7**
9. **Synthesis of 2-aminobenzoic acids 12 and their physical and spectral data. Pag 7-8**
10. **Synthesis of 1,3-benzodithioles 13 and their physical and spectral data. Pag 8-9**
11. **<sup>1</sup>H NMR and <sup>13</sup>C NMR spectra of unknown products. Pag. 10-63**
12. **HPLC spectra of sulfonylchlorides 14. Pag. 64-71**
13. **Spectral and physical data of nitriles 21. Pag. 72-74**
14. **<sup>1</sup>H NMR and <sup>13</sup>C NMR spectra of nitriles 21. Pag. 75-90**
15. **Chiral GC spectra of nitriles 21 . Pag. 91-110**

## 1. Synthesis of 4-Iodonitroanilines **5**

ICI 1M in MeCOOH (20 ml) was added to a MeCOOH (5 ml) solution of nitroaniline **4** (5 mmol). The mixture was stirred at 30 °C for 3 h until GC and GC-MS analyses showed the complete disappearance of the starting compound and the complete formation of iodinate product **5**. The reaction mixture was poured into a cold 10% aqueous NaHCO<sub>3</sub> solution (15 ml). A precipitate was formed and was gathered on a Buchner funnel and washed with further NaHCO<sub>3</sub> solution (15 ml) in order to remove completely MeCOOH. The resulting solid was the virtually pure **5**.

**4-Iodo-6-methyl-2-nitroaniline (5a)**. Brown solid (1.39 g; 100% yield). Mp 140–141 °C (EtOH; lit 139–140 °C). <sup>1</sup>H NMR (200 MHz, CDCl<sub>3</sub>): δ = 8.27 (s, 1H), 7.46 (s, 1H), 6.12 (br s, 2H), 2.15 (s, 3H); <sup>1</sup>H NMR data identical to that reported in the literature.<sup>15</sup> <sup>13</sup>C NMR (50 MHz, CDCl<sub>3</sub>): δ = 144.1, 143.1, 132.6, 131.7, 123.8, 75.7, 17.4. MS (EI) *m/z*: (%) 278 [M<sup>+</sup>] (100), 232 (35), 105 (35). IR (neat) ν (cm<sup>-1</sup>): 3508, 3504 (NH<sub>2</sub>), 1585, 1312 (NO<sub>2</sub>).

W. Marterer, W. Prikozovich, J. Wiss and M. Prashad, *Org. Process Res. Dev.*, 2003, **7**, 318.

**4-Iodo-5,6-dimethyl-2-nitroaniline (5b)**. Brown solid (1.46 g; 100% yield). Mp 158–159 °C (from EtOH). Found: C 32.94; H 3.07; N 9.54. C<sub>8</sub>H<sub>9</sub>IN<sub>2</sub>O<sub>2</sub> requires: C 32.90; H 3.11; N 9.59%. <sup>1</sup>H NMR (200 MHz, CDCl<sub>3</sub>): δ = 8.44 (s, 1H), 6.16 (br s, 2H), 2.42 (s, 3H), 2.16 (s, 3H). <sup>13</sup>C NMR (50 MHz, CDCl<sub>3</sub>): δ = 146.2, 143.2, 141.7, 133.5, 123.6, 85.6, 26.9, 15.2. MS (EI) *m/z*: (%) 292 [M<sup>+</sup>] (100), 246 (25), 119 (25). IR (neat) ν (cm<sup>-1</sup>): 3510, 3500 (NH<sub>2</sub>), 1535, 1350 (NO<sub>2</sub>)

## 2. Synthesis of Diiodonitro derivatives (**7**)

First HBF<sub>4</sub>·Et<sub>2</sub>O (54 %; 6 mmol, 0.97 g) and then *i*-pentyl nitrite (6 mmol, 0.70 g) were added to a cooled (5 °C) suspension of iodonitroaniline **5** (5 mmol) in MeCOOH (20 ml). A clear solution was obtained; it was stirred for about 30 min at rt. Then, anhydrous Et<sub>2</sub>O (50 ml) was added to this solution, previously cooled (5 °C); a white precipitate was formed and it was gathered on a Buchner funnel. This solid was the corresponding diazonium tetrafluoroborate **6** and it was reacted immediately in the next step without further purification.

**6** was added at rt to a stirred MeCN (20 mL) solution of tetra-*n*-butylammonium iodide (5.5 mmol, 2.03 g). Stirring was maintained for about 30 minutes until the complete disappearance of **6**. The reaction mixture was poured into Et<sub>2</sub>O-H<sub>2</sub>O (100 mL, 1:1). The aqueous layer was separated and extracted with Et<sub>2</sub>O (100 mL). The combined organic extracts were washed with H<sub>2</sub>O (50 mL),

dried over Na<sub>2</sub>SO<sub>4</sub> and evaporated under reduced pressure. The obtained solid was the virtually pure **7**.

**2,5-Diiodo-3-nitrotoluene (7a)**. Brown solid (1.78 g, 91% yield). Mp 93–94 °C (EtOH; lit 95 °C). <sup>1</sup>H NMR (200 MHz, CDCl<sub>3</sub>): δ = 7.68 (s, 1H), 7.66 (s, 1H), 2.47 (s, 3H); <sup>13</sup>C NMR (50 MHz, CDCl<sub>3</sub>): δ = 147.2, 141.7, 130.5, 118.9, 92.7, 92.5, 29.2. MS (EI) *m/z*: (%) 389 [M<sup>+</sup>] (100), 343 (15), 216 (35). IR (neat) ν (cm<sup>-1</sup>): 1542, 1358 (NO<sub>2</sub>)

H. L. Wheeler, *Am. Chem. J.*, 1911, **44**, 493.

**3,6-Diiodo-4-nitro-*o*-xylene (7b)**. Grey solid (1.90 g; 94% yield). Mp 117–118 °C (EtOH). Found: C 23.92; H 1.77; N 3.44. C<sub>8</sub>H<sub>7</sub>INO<sub>2</sub> requires: C 23.85; H 1.75; N 3.48%. <sup>1</sup>H NMR (200 MHz, CDCl<sub>3</sub>): δ = 7.84 (s, 1H), 2.64 (s, 3H), 2.57 (s, 3H). <sup>13</sup>C NMR (50 MHz, CDCl<sub>3</sub>): δ = 144.2, 143.3, 141.8, 132.1, 101.0, 93.6, 29.0, 28.1. MS (EI) *m/z*: (%) 403 [M<sup>+</sup>] (100), 357 (15), 230 (25), 103 (15). IR (neat) ν (cm<sup>-1</sup>): 1522, 1351 (NO<sub>2</sub>)

### 3. Synthesis of 4-nitro-3,6-bis(*o*-tolyl)-*o*-xylene (**15**)

*o*-Tolylboronic acid (4.5 mmol, 0.61 g) and then K<sub>3</sub>PO<sub>4</sub> (12 mmol, 2.54 g) were added to a stirring mixture of 3,6-diiodo-4-nitro-*o*-xylene (**7b**, 2 mmol, 0.81 g), tris(dibenzylideneacetone)dipalladium (Pd<sub>2</sub>(dba)<sub>3</sub>) as a catalyst (0.04 mmol; 37 mg) and 2-dicyclohexylphosphino-2',6'-dimethoxybiphenyl (Sphos) as a ligand (0.32 mmol; 0.132 g) in anhydrous toluene (15 mL). The mixture was stirred at reflux until the disappearance of **7b** as monitored by TLC (PE/Et<sub>2</sub>O 4:1). Then, the reaction mixture was poured into CH<sub>2</sub>Cl<sub>2</sub>-H<sub>2</sub>O (100 ml, 1:1). The aqueous layer was separated and extracted with CH<sub>2</sub>Cl<sub>2</sub> (100 mL). The combined organic extracts were washed with H<sub>2</sub>O (100 mL), dried over Na<sub>2</sub>SO<sub>4</sub> and evaporated under reduced pressure. The crude residue, purified in a chromatography column (PE/Et<sub>2</sub>O 4:1), afforded pure **15**.

**4-Nitro-3,6-bis(*o*-tolyl)-*o*-xylene (**15**)**. Mixture of diastereomers. Yellow solid (0.63 g, 95% yield). Mp 124–125 °C (EtOH). Found: C 79.72; H 6.45; N 4.20. C<sub>22</sub>H<sub>21</sub>NO<sub>2</sub> requires: C 79.73; H 6.39; N 4.23%. <sup>1</sup>H NMR (200 MHz, CDCl<sub>3</sub>): δ = 7.53 (s, 1H), 7.26–6.97 (m, 8H), 2.08, 2.06, 2.05, 2.04, 1.95 (5s, 12H). <sup>13</sup>C NMR (50 MHz, CDCl<sub>3</sub>): δ = 147.8, 141.8, 140.8, 140.2, 138.1, 136.9, 136.7, 136.1, 136.0, 134.1, 130.3, 130.2, 129.5, 129.4, 128.5, 128.4, 128.2, 126.2, 122.3, 20.2, 20.1, 18.0, 17.6. MS (EI) *m/z*: (%) 331 [M<sup>+</sup>] (90), 314 (100), 301 (95), 284 (100), 269 (85), 253 (85), 239 (55). IR (neat) ν (cm<sup>-1</sup>): 1520, 1355 (NO<sub>2</sub>).

We also performed the reaction using 1-naphthylboronic acid (4.5 mmol, 0.77 g). It was not possible to isolate 4-nitro-3,6-bis(1-naphthyl)-*o*-xylene in acceptable purity.

#### 4. Synthesis of diiodoanilines **8**

Fe powder (15 mmol, 0.84 g) and CaCl<sub>2</sub> (5 mmol, 0.55 g; dissolved in 2 ml of H<sub>2</sub>O) were added to a stirred EtOH solution (15 mL) of nitroderivative **7** (5 mmol). Stirring was maintained for about 6 hours until its complete disappearance. The crude residue was filtered on a Buchner funnel in order to remove the excess Fe and EtOH was evaporated under reduced pressure. The crude residue was poured into Et<sub>2</sub>O/H<sub>2</sub>O (100 mL, 1:1). The aqueous layer was separated and extracted with Et<sub>2</sub>O (100 mL). The combined organic extracts were washed with H<sub>2</sub>O (100 mL), dried over Na<sub>2</sub>SO<sub>4</sub> and evaporated under reduced pressure. The obtained solid was the virtually pure **8**.

**2,5-Diiodo-3-methylaniline (8a)**. Brown solid (1.65 g, 92% yield). Mp 84–85 °C (EtOH; lit 82 °C). <sup>1</sup>H NMR (200 MHz, CDCl<sub>3</sub>): δ = 6.91 (s, 1H), 6.84 (s, 1H), 6.13 (br s, 2H), 2.15 (s, 3H); <sup>13</sup>C NMR (50 MHz, CDCl<sub>3</sub>): δ = 148.7, 144.4, 128.0, 120.3, 94.1, 90.9, 24.4. MS (EI) *m/z*: (%) 359 [M<sup>+</sup>] (100), 232 (15), 105 (20). IR (neat) ν (cm<sup>-1</sup>): 3410, 3406 (NH<sub>2</sub>).

W. Marterer, W. Prikoszovich, J. Wiss and M. Prashad, *Org. Process Res. Dev.*, 2003, **7**, 318.

**2,5-Diiodo-3,4-dimethylaniline (8b)**. Pale red waxy solid (1.55 g; 83% yield). Found: C 25.81; H 2.44; N 3.67. C<sub>8</sub>H<sub>9</sub>I<sub>2</sub>N requires: C 25.76; H 2.43; N 3.76%. <sup>1</sup>H NMR (200 MHz, CDCl<sub>3</sub>): δ = 7.11 (s, 1H), 4.00 (br s, 2H), 2.47 (s, 3H), 2.40 (s, 3H). <sup>13</sup>C NMR (50 MHz, CDCl<sub>3</sub>): δ = 151.8, 146.1, 141.8, 122.4, 102.7, 93.9, 28.5, 26.7. MS (EI) *m/z*: (%) 373 [M<sup>+</sup>] (100), 357 (15), 246 (25), 118 (15). IR (neat) ν (cm<sup>-1</sup>): 3418, 3412 (NH<sub>2</sub>).

#### 5. Synthesis of 2,5-bis(*o*-tolyl)-3,4-dimethylaniline (**16**)

The same protocol as the synthesis of diiodoanilines **8** was used, starting from 4-nitro-3,6-bis(2-tolyl)benzene (**15**; 5 mmol, 1.65 g). The only difference was the use of Zn (15 mmol, 0.98 g) instead of Fe.

**2,5-Bis(*o*-tolyl)-3,4-dimethylaniline (16)**. Mixture of diastereomers. Pale brown solid (1.35 g; 90% yield). Mp 158–159 °C (EtOH). Found: C 87.68; H 7.62; N 4.70. C<sub>22</sub>H<sub>23</sub>N requires: C 87.66; H



7.69; N 4.65%. <sup>1</sup>H NMR (200 MHz, CDCl<sub>3</sub>): δ = 7.32–7.07 (m, 9H), 6.51 (br s, 2H), 2.07, 2.05, 2.03, 2.03, 1.86, 1.84 (6s, 12H). <sup>13</sup>C NMR (50 MHz, CDCl<sub>3</sub>): δ = 143.0, 142.9, 141.5, 141.4, 140.9, 140.7, 138.6, 138.5, 137.5, 137.4, 136.3, 136.2, 135.4, 135.2, 130.6, 130.4, 130.3, 129.8, 129.7, 129.6, 127.7, 127.0, 126.7, 125.6, 124.6, 114.0, 20.2, 20.0, 19.8, 19.6, 17.5, 16.4. MS (EI) *m/z*: (%) 301 [M<sup>+</sup>] (100), 286 (15), 271(15). IR (neat) ν (cm<sup>-1</sup>): 3416, 3410 (NH<sub>2</sub>).

## 6. Synthesis of diiodoisatins **10**

**10** were prepared, starting from diiodoanilines (**8**, 5 mmol), as described in the literature (V. Lisowski, M. Robba and S. Rault, *J. Org. Chem.*, 2000, **65**, 4193.) The intermediates *N*-(2,5-diiodo-3-methylphenyl)hydroxyiminoacetamide (**9a**), MS (EI) *m/z*: (%) 385 [M<sup>+</sup> - CH<sub>2</sub>=NOH] (40), 359 (100), 232 (15), 105 (15) and *N*-(2,5-diiodo-3,4-dimethylphenyl)hydroxyiminoacetamide (**9b**), MS (EI) *m/z*: (%) 399 [M<sup>+</sup> -CH<sub>2</sub>=NOH] (35), 373 (100), 246 (15) were converted into **10** upon heating to 35 °C in H<sub>2</sub>SO<sub>4</sub> (15 ml) and were used without further purification. At higher temperatures the decomposition of these intermediates was observed.

**4,7-Diiodo-5-methylisatin (10a)**. Red solid (1.60 g, 77% yield). Mp 159 °C (EtOH). Found: C 26.13; H 1.21; N 3.33. C<sub>9</sub>H<sub>5</sub>I<sub>2</sub>NO<sub>2</sub> requires: C 26.18; H 1.22; N 3.39%. <sup>1</sup>H NMR (200 MHz, CDCl<sub>3</sub>): δ = 7.65 (br s, 1H), 7.44 (s, 1H), 2.40 (s, 3H). <sup>13</sup>C NMR (50 MHz, DMSO-d<sub>6</sub>): δ = 183.2, 160.6, 156.1, 153.3, 134.6, 119.6, 93.2, 85.9, 28.5. MS (EI) *m/z*: (%) 413 [M<sup>+</sup>] (65), 385(100), 258 (25), 230 (20). IR (neat) ν (cm<sup>-1</sup>): 3298 (NH), 1731 (CO), 1578 (CONH).

**4,7-Diiodo-5,6-dimethylisatin (10b)**. Red solid (0.55 g, 26% yield). Mp 233 °C (EtOH). Found: C 28.18; H 1.61; N 3.31. C<sub>10</sub>H<sub>7</sub>I<sub>2</sub>NO<sub>2</sub> requires: C 28.13; H 1.65; N 3.28%. <sup>1</sup>H NMR (200 MHz, CDCl<sub>3</sub>): δ = 7.62 (br s, 1H), 2.58 (s, 3H), 2.52 (s, 3H). <sup>13</sup>C NMR (50 MHz, DMSO-d<sub>6</sub>): δ = 183.5, 159.9, 154.5, 149.7, 135.3, 119.7, 101.2, 87.8, 28.7, 25.2. IR (neat) ν (cm<sup>-1</sup>): 3305 (NH), 1729 (CO), 1576 (CONH).

## 7. Synthesis of 5,6-dimethyl-4,7-bis(*o*-tolyl)isatin (**11b**)

**11b** was prepared from 2,5-bis(*o*-tolyl)-3,4-dimethylaniline (**16**; 1.51 g, 5 mmol), as described in the literature (V. Lisowski, M. Robba and S. Rault, *J. Org. Chem.*, 2000, **65**, 4193).

The intermediate *N*-[2,5-bis(*o*-tolyl)-3,4-dimethylphenyl]hydroxyiminoacetamide (**17**), MS (EI) *m/z*: (%) 327 [M<sup>+</sup> - CH<sub>2</sub>=NOH] (100), 312 (20), 298 (15), 284 (25) was converted into the title

compound upon heating to 50 °C in MeSO<sub>3</sub>H (15 ml) and used without further purification. It was impossible to obtain **11b** using H<sub>2</sub>SO<sub>4</sub>.

**5,6-Dimethyl-4,7-bis(*o*-tolyl)isatin (11b).** Mixture of diastereomers. Orange solid (1.58 g; 89% yield). Mp 126–127 °C (EtOH). Found: C 81.03; H 6.00; N 3.93. C<sub>24</sub>H<sub>21</sub>NO<sub>2</sub> requires: C 81.10; H 5.96; N 3.94%. <sup>1</sup>H NMR (200 MHz, CDCl<sub>3</sub>): δ = 7.34–6.96 (m, 9H), 2.11, 2.09, 2.03, 2.00, 1.99, 1.88 (6s, 12H). <sup>13</sup>C NMR (50 MHz, CDCl<sub>3</sub>): δ = 181.8, 159.3, 147.4, 145.4, 140.6, 137.0, 136.9, 136.4, 135.6, 135.5, 133.8, 131.5, 131.1, 130.2, 129.9, 129.8, 129.2, 128.4, 128.3, 127.0, 126.1, 125.0, 113.9, 19.8, 19.7, 18.8, 16.1. MS (EI) *m/z*: (%) 355 [M<sup>+</sup>] (55), 340 (15), 327 (15), 312 (100), 297 (25). IR (neat) ν (cm<sup>-1</sup>): 3312 (NH), 1729 (CO), 1585 (CONH).

## 8. Synthesis of diarylisatins 11

*o*-Tolylboronic acid (4.5 mmol, 0.61 g) or 1-naphthylboronic acid (4.5 mmol, 0.77 g) and then CsF (5 mmol, 0.76 g), dissolved in H<sub>2</sub>O (8 mL), were added to a stirring mixture of diiodoisatine (**10**, 2 mmol), Pd(OAc)<sub>2</sub> (0.4 mmol; 48 mg) and 2-dicyclohexylphosphino-2',6'-dimethoxybiphenyl (Sphos) as a ligand (0.4 mmol; 0.16 g) in DME (10 mL). The mixture was stirred at reflux until the disappearance of **10**, as monitored by TLC (CH<sub>2</sub>Cl<sub>2</sub>/EtOAc, 9.8:0.2). The reaction mixture was then poured into CH<sub>2</sub>Cl<sub>2</sub>-H<sub>2</sub>O (100 ml, 1:1). The aqueous layer was separated and extracted with CH<sub>2</sub>Cl<sub>2</sub> (100 mL). The combined organic extracts were washed with H<sub>2</sub>O (100 mL), dried over Na<sub>2</sub>SO<sub>4</sub> and evaporated under reduced pressure. The crude residue, purified in a chromatography column (CH<sub>2</sub>Cl<sub>2</sub>/EtOAc, 98:2), afforded pure **11**.

**5-Methyl-4,7-bis(*o*-tolyl)isatin (11a).** Red solid (0.58 g, 85% yield). Mp 79–80 °C (EtOH). Found: C 80.99; H 5.55; N 4.13. C<sub>23</sub>H<sub>19</sub>NO<sub>2</sub> requires: C 80.92; H 5.61; N 4.10%. <sup>1</sup>H NMR (200 MHz, CDCl<sub>3</sub>): δ = 7.34–7.10 (m, 8H), 7.02 (br s, 1H), 6.82 (s, 1H), 2.15 (s, 3H), 2.11 (s, 3H), 2.07 (s, 3H). <sup>13</sup>C NMR (50 MHz, CDCl<sub>3</sub>): δ = 181.6, 159.2, 148.3, 147.4, 141.5, 136.9, 136.7, 136.1, 133.0, 131.2, 130.3, 129.7, 129.1, 128.7, 127.5, 127.1, 125.8, 124.4, 114.0, 21.0, 19.9, 19.7. MS (EI) *m/z*: (%) 341 [M<sup>+</sup>] (85), 326(35), 313 (25), 298 (100), 283 (25), 270 (15), 254 (40). IR (neat) ν (cm<sup>-1</sup>): 3313 (NH), 1727 (CO), 1574 (CONH).

**5,6-Dimethyl-4,7-bis(*o*-tolyl)isatin (11b).** Orange solid (0.20 g, 28%).

**11b** was also prepared as reported above for the synthesis of **15**. We obtained 0.62 g (87% yield).

**5,6-Dimethyl-4,7-bis(1-naphthyl)isatin (11c).** Mixture of diastereomers. Red waxy solid (0.25 g; 29% yield). Found: C 84.24; H 4.94; N 3.31. C<sub>30</sub>H<sub>21</sub>NO<sub>2</sub> requires: C 84.29; H 4.95; N 3.28%. <sup>1</sup>H NMR (200 MHz, CDCl<sub>3</sub>): δ = 7.98–7.90 (m, 4H), 7.62–7.28 (m, 10H), 6.87 (br s, 1H), 2.05 (s, 3H), 1.89 (s, 3H). <sup>13</sup>C NMR (50 MHz, CDCl<sub>3</sub>): δ = 181.8, 159.1, 148.2, 146.6, 137.8, 137.6, 134.6, 134.2, 133.9, 133.8, 133.6, 132.5, 132.0, 131.8, 131.7, 129.5, 129.1, 128.7, 128.4, 128.1, 127.5, 127.1, 126.9, 126.7, 126.6, 126.1, 125.7, 125.4, 125.2, 125.1, 125.0, 124.1, 114.8, 19.2, 16.5. MS (ESI +) *m/z*: 428.26 (M + H)<sup>+</sup>. IR (neat) ν (cm<sup>-1</sup>): 3308 (NH), 1726 (CO), 1582 (CONH).

**11c** was also prepared as reported above for the synthesis of **15**. We obtained 0.77 g (89% yield).

## 9. Synthesis of 2-aminobenzoic acids **12**

A 30% hydrogen peroxide aqueous solution (10 mL) and 5% aqueous NaOH solution (10 mL) were slowly added to a stirred solution of isatin (**11**; 2 mmol) in 1,4-dioxane (5 mL) at 50 °C. The reaction mixture was stirred at 80 °C for 30 min and then was taken to rt, while stirring for other 30 min. The reaction mixture was filtered, and the resulting solution was acidified with 1M HCl until pH 3-4; the resulting solid, the virtually pure **12**, was collected by filtration on a Buchner funnel.

**2-Amino-4-methyl-3,6-bis(*o*-tolyl)benzoic acid (12a).** Mixture (1:1) of two diastereomers. The diastereomer ratio was determined by <sup>1</sup>H NMR analysis. In particular, the ratio was deduced by comparing the integration area of the signal centred at 2.13 ppm (pertinent to one of the Me bonded to aromatic rings) of one diastereomer, with the signal centred at 2.11 ppm of the other diastereomer. Pale yellow solid. (0.59 g, 89% yield). Mp 201–202 °C (EtOH). Found: C 79.68; H 6.35; N 4.33. C<sub>22</sub>H<sub>21</sub>NO<sub>2</sub> requires: C 79.73; H 6.39; N 4.23%. <sup>1</sup>H NMR (200 MHz, CDCl<sub>3</sub>): δ = 7.28–7.09 (m, 8H), 6.35 (s, 1H), 2.13, 2.11, 2.05, 1.84 (4s, 9H). <sup>13</sup>C NMR (50 MHz, CDCl<sub>3</sub>): δ = 173.4, 148.3, 143.7, 143.4, 141.3, 137.6, 137.4, 136.5, 135.5, 135.4, 130.9, 130.3, 130.2, 129.6, 128.5, 128.3, 127.1, 126.9, 126.7, 125.2, 121.7, 20.7, 20.3, 20.2, 19.4, 19.3. MS (ESI +) *m/z*: 332.29 (M + H)<sup>+</sup>. IR (neat) ν (cm<sup>-1</sup>): 3408, 3403 (NH<sub>2</sub>), 2911 (OH), 1702 (CO).

**2-Amino-4,5-dimethyl-3,6-bis(*o*-tolyl)benzoic acid (12b).** Mixture of diastereomers. Pale yellow solid (0.59 g; 86% yield). Mp 168–171 °C (EtOH). Found: C 79.98; H 6.65; N 4.03. C<sub>23</sub>H<sub>23</sub>NO<sub>2</sub> requires: C 79.97; H 6.71; N 4.05%. <sup>1</sup>H NMR (200 MHz, CDCl<sub>3</sub>): δ = 7.28–6.95 (m, 8H), 2.03, 2.02, 1.83, 1.71 (4s, 9H). <sup>13</sup>C NMR (50 MHz, CDCl<sub>3</sub>): δ = 172.9, 144.7, 141.9, 140.5, 137.6, 136.5, 136.4, 131.2, 130.8, 130.4, 130.3, 129.6, 128.7, 128.6, 128.2, 127.5, 127.1, 125.7, 124.2, 120.8,

20.0, 19.9, 19.6, 19.4, 18.3, 16.5. MS (ESI +)  $m/z$ : 346.26 (M + H)<sup>+</sup>. IR (neat)  $\nu$  (cm<sup>-1</sup>): 3403, 3401 (NH<sub>2</sub>), 2915 (OH), 1704 (CO).

**2-Amino-4,5-dimethyl-3,6-bis(1-naphthyl)benzoic acid (12c).** Mixture of diastereomers. Pale yellow waxy solid (0.74 g; 89% yield). Found: C 83.51; H 5.50; N 3.33. C<sub>29</sub>H<sub>23</sub>NO<sub>2</sub> requires: C 83.43; H 5.55; N 3.35%. <sup>1</sup>H NMR (200 MHz, CDCl<sub>3</sub>):  $\delta$  = 7.91–7.71 (m, 5H), 7.59–7.32 (m, 9H), 1.80 (s, 3H), 1.66 (s, 3H). <sup>13</sup>C NMR (50 MHz, CDCl<sub>3</sub>):  $\delta$  = 173.4, 145.4, 145.3, 141.3, 140.7, 140.4, 136.0, 134.4, 133.5, 132.8, 132.2, 128.7, 128.5, 128.4, 128.3, 127.2, 126.9, 126.8, 126.6, 126.4, 126.3, 126.1, 125.7, 125.6, 125.5, 125.4, 18.7, 17.1. MS (ESI +)  $m/z$ : 418.46 (M + H)<sup>+</sup>. IR (neat)  $\nu$  (cm<sup>-1</sup>): 3407, 3404 (NH<sub>2</sub>), 2911 (OH), 1702 (CO).

## 10. Synthesis of 1,3-benzodithioles 13

3-Methylbutyl nitrite (4.8 mmol, 0.56 g), 3-methylbutan-1-ol (4 mmol, 0.35 g) and CS<sub>2</sub> (33.2 mmol, 2.52 g) were dissolved in 1,2-dichloroethane (40 mL) and heated to reflux at 82 °C. 2-Amino-benzoic acid (**12**; 2 mmol) dissolved in 1,4-dioxane (12 mL) was added dropwise to the previously prepared mixture. The resulting mixture was stirred first at reflux for 45 min and then at rt for 1 h. The reaction mixture was poured into Et<sub>2</sub>O/H<sub>2</sub>O (100 mL, 1:1). The aqueous layer was separated and extracted with Et<sub>2</sub>O (100 mL). The combined organic extracts were washed with H<sub>2</sub>O (100 mL) and a saturated solution of Na<sub>2</sub>CO<sub>3</sub> (50 mL), dried over Na<sub>2</sub>SO<sub>4</sub> and evaporated under reduced pressure. The crude residue, purified by column chromatography (PE/Et<sub>2</sub>O 95:5), afforded pure **13**.

**5-Methyl-2-(3-methylbutoxy)-4,7-bis(*o*-tolyl)-1,3-benzodithiole (13a).** Mixture of two diastereomers. The diastereomer ratio was determined by <sup>1</sup>H NMR analysis. In particular, the ratio was deduced by comparing the integration area of the signal centred at 6.55 ppm (pertinent to the H of the C bound to two S) of one diastereomer, with the signal centred at 6.53 ppm of the other diastereomer. Viscous pale yellow oil (0.75 g, 86% yield). Found: C 74.57; H 6.95; S 14.83. C<sub>27</sub>H<sub>30</sub>OS<sub>2</sub> requires: C 74.61; H 6.96; S 14.75%. <sup>1</sup>H NMR (200 MHz, CDCl<sub>3</sub>):  $\delta$  = 7.29–7.13 (m, 8H), 6.84 (s, 1H), 6.55 and 6.53 (2s, 1H), 3.37 (t,  $J$  = 6.7 Hz, 2H), 2.24–1.94 (m, 9H), 1.67–1.37 (m, 1H), 1.33–1.27 (m, 2H), 0.79–0.74 (m, 6H). <sup>13</sup>C NMR (50 MHz, CDCl<sub>3</sub>):  $\delta$  = 141.8, 141.1, 140.3, 136.2, 135.7, 135.6, 134.9, 134.8, 134.3, 133.6, 133.5, 130.5, 130.4, 129.3, 129.1, 129.0, 128.9, 128.6, 128.3, 128.2, 126.5, 126.0, 88.6, 88.5, 48.8, 38.8, 37.9, 25.3, 25.1, 24.9, 22.6, 20.2, 20.0, 19.5. MS (ESI +)  $m/z$ : 435.29 (M + H)<sup>+</sup>.

**5,6-Dimethyl-2-(3-methylbutoxy)-4,7-bis(*o*-tolyl)-1,3-benzodithiole (13b).** Complex mixture of diastereomers. Viscous pale yellow oil (0.78 g; 87% yield). Found: C 74.99; H 7.13; S 14.32.  $C_{28}H_{32}OS_2$  requires: C 74.95; H 7.19; S 14.29%.  $^1H$  NMR (200 MHz,  $CDCl_3$ ):  $\delta$  = 7.29–7.22 and 7.08–7.04 (2m, 8H), 6.48 and 6.47 (2s, 1H), 3.40–3.32 (m, 2H), 2.12, 2.10, 2.04, 2.02, 1.89 (5s, 12H), 1.58–1.41 (m, 1H), 1.38–1.29 (m, 2H), 0.77–0.73 (m, 6H).  $^{13}C$  NMR (50 MHz,  $CDCl_3$ ):  $\delta$  = 141.4, 136.3, 136.2, 135.9, 135.7, 134.5, 134.4, 134.1, 134.0, 132.6, 132.5, 130.5, 130.3, 130.1, 129.5, 129.2, 129.1, 128.9, 128.2, 127.4, 128.2, 126.6, 126.2, 125.8, 88.3, 88.2, 88.0, 41.6, 39.1, 38.1, 37.7, 25.5, 25.3, 25.2, 24.9, 22.9, 22.8, 20.1, 19.9, 19.7, 19.5, 17.1. MS (EI)  $m/z$ : (%) 377 [ $M^+$ -71 ( $C_5H_{11}$ )] (100). MS (ESI +)  $m/z$ : 449.51 ( $M + H$ ) $^+$ .

**5,6-Dimethyl-2-(3-methylbutoxy)-4,7-bis(1-naphthyl)-1,3-benzodithiole (13c).** Complex mixture of diastereomers. Viscous pale yellow oil (0.90 g; 87% yield) Found: C 78.45; H 6.09; S 12.35.  $C_{34}H_{32}OS_2$  requires: C 78.42; H 6.19; S 12.31%.  $^1H$  NMR (200 MHz,  $CDCl_3$ ):  $\delta$  = 7.92–7.90 (m, 4H), 7.56–7.38 (2m, 10H), 6.45, 6.41 and 6.37 (3s, 1H) 3.51–3.25 (m, 2H), 1.94 (s, 3H), 1.93 (s, 3H), 1.56–1.14 (m, 3H), 0.89–0.71 (m, 6H).  $^{13}C$  NMR (50 MHz,  $CDCl_3$ ):  $\delta$  = 139.4, 139.2, 135.1, 135.0, 134.9, 133.9, 133.8, 133.6, 133.5, 133.2, 131.3, 130.9, 128.6, 128.5, 128.2, 128.1, 126.8, 126.7, 126.4, 126.1, 125.7, 125.6, 125.4, 125.3, 125.1, 88.3, 87.8, 87.4, 37.7, 37.5, 28.5, 24.9, 22.5, 17.2. MS (ESI +)  $m/z$ : 521.31 ( $M + H$ ) $^+$ .

## 11. $^1\text{H}$ NMR and $^{13}\text{C}$ NMR spectra of unknown products.

### 11.1 4,7-Diiodo-5-methylsatin (10a)

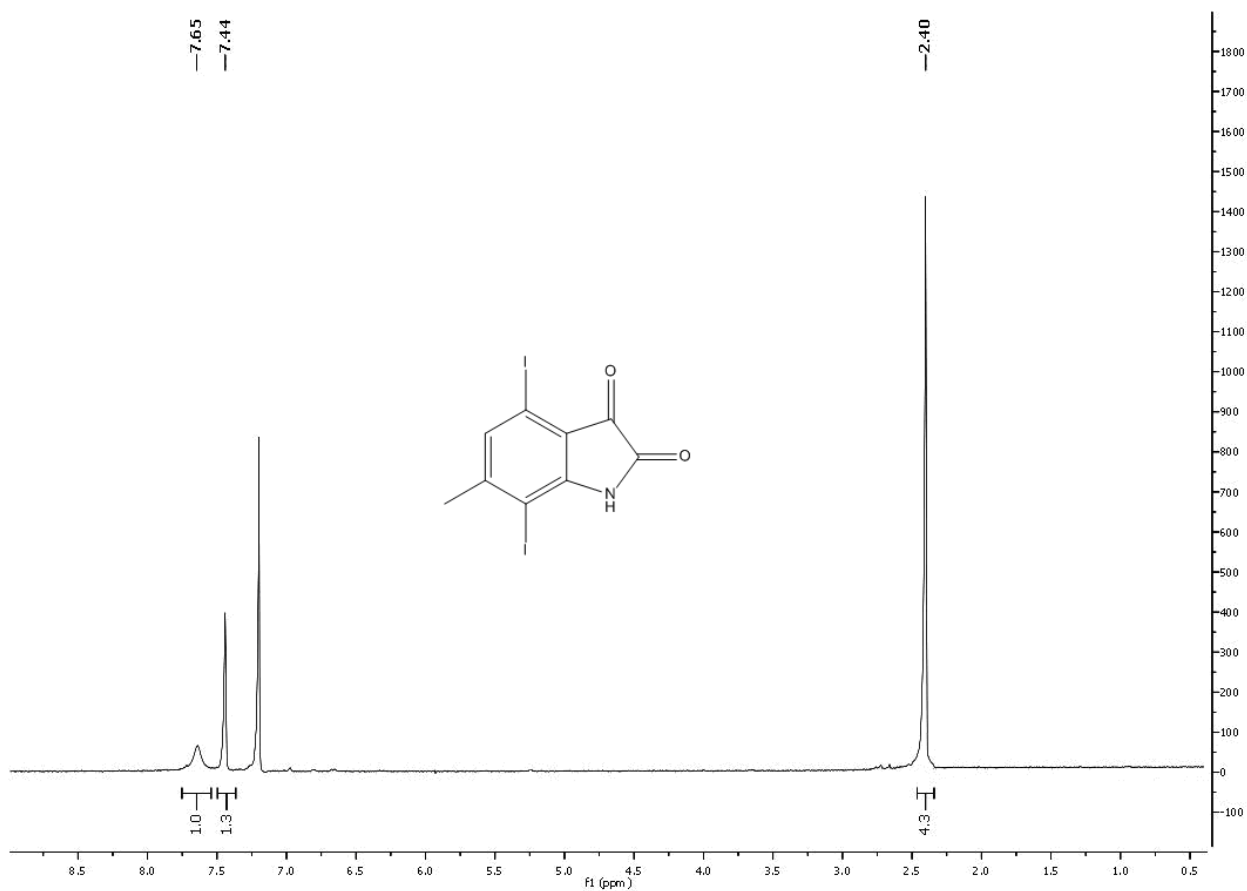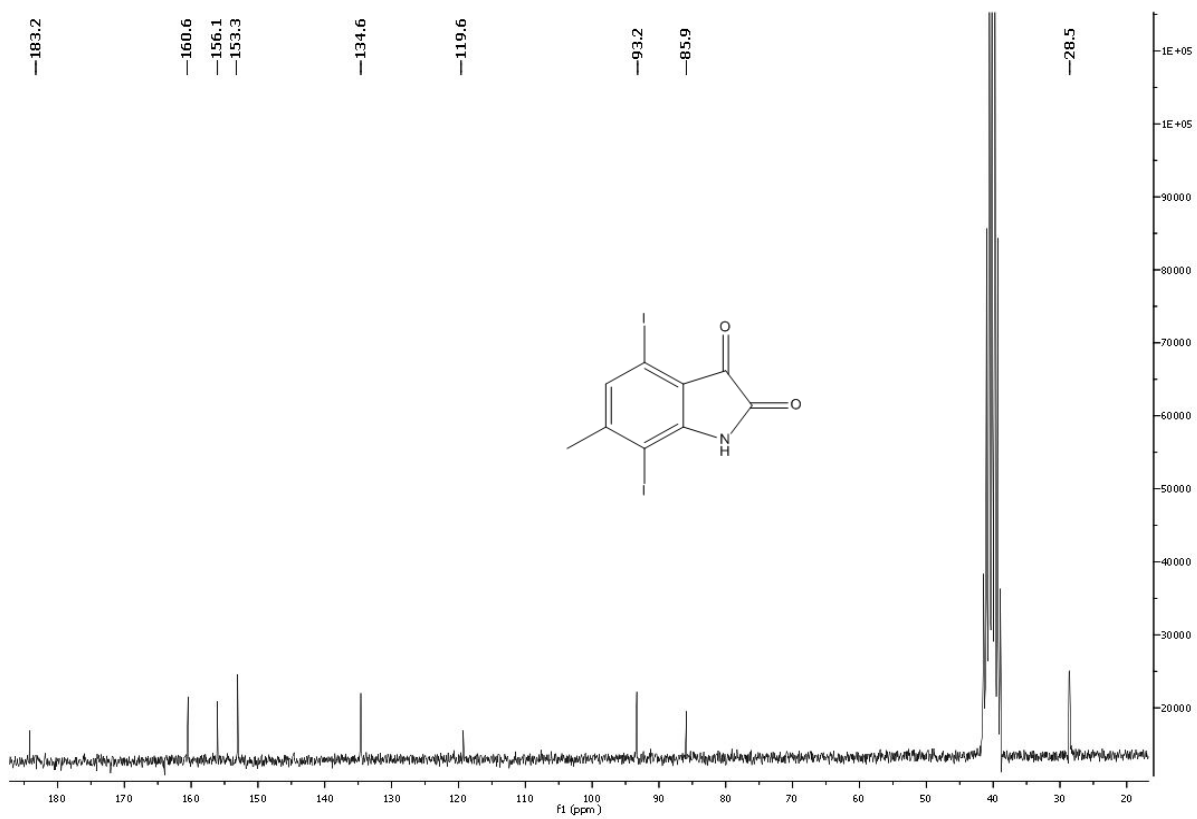

## 11.2 5-Methyl-4,7-bis(*o*-tolyl)isatin (11a)

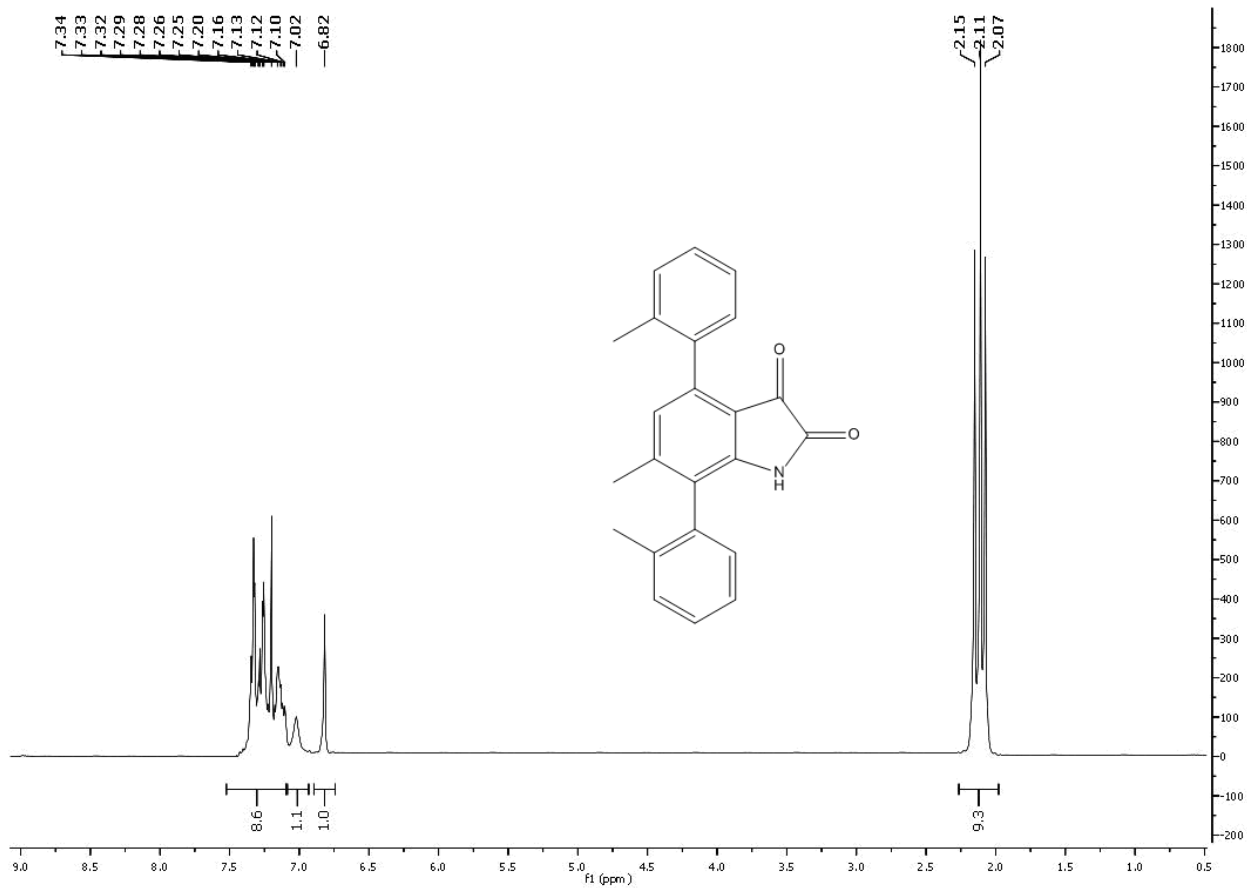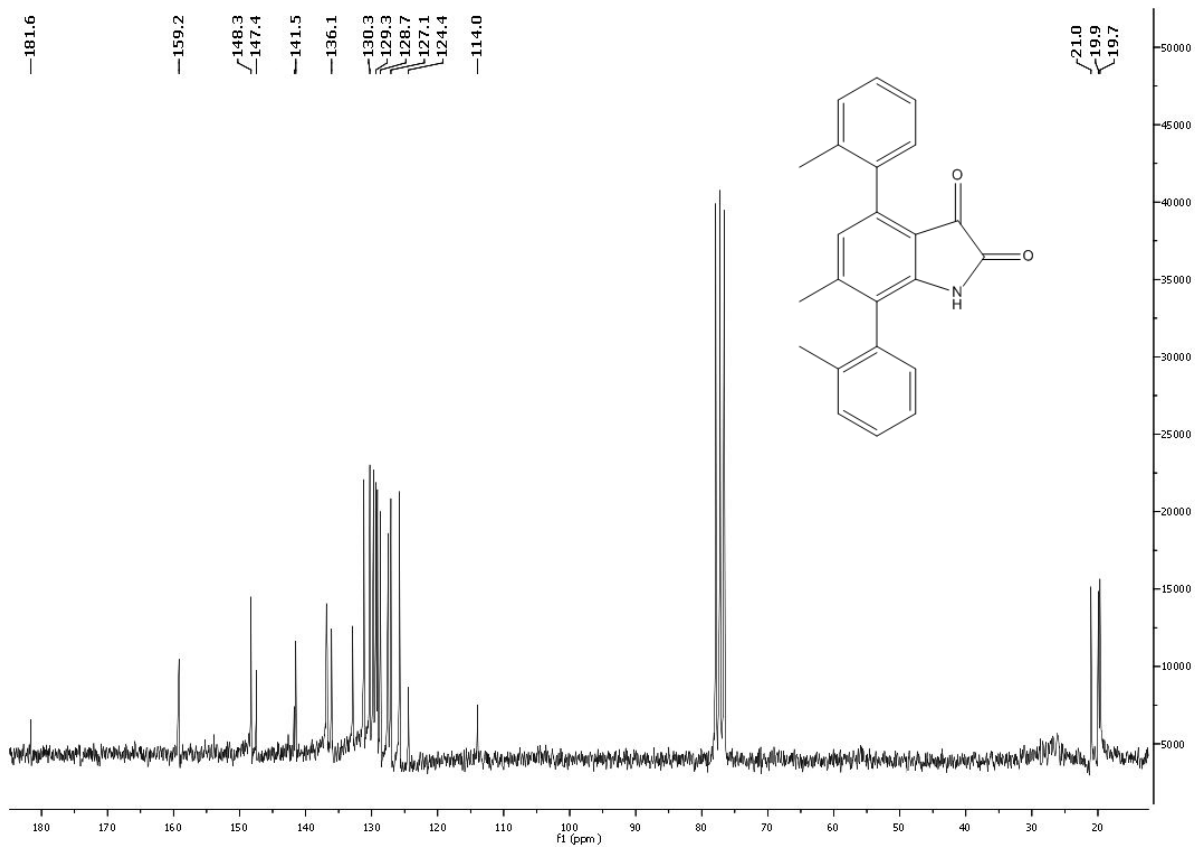

# Expansion between 149-124 ppm

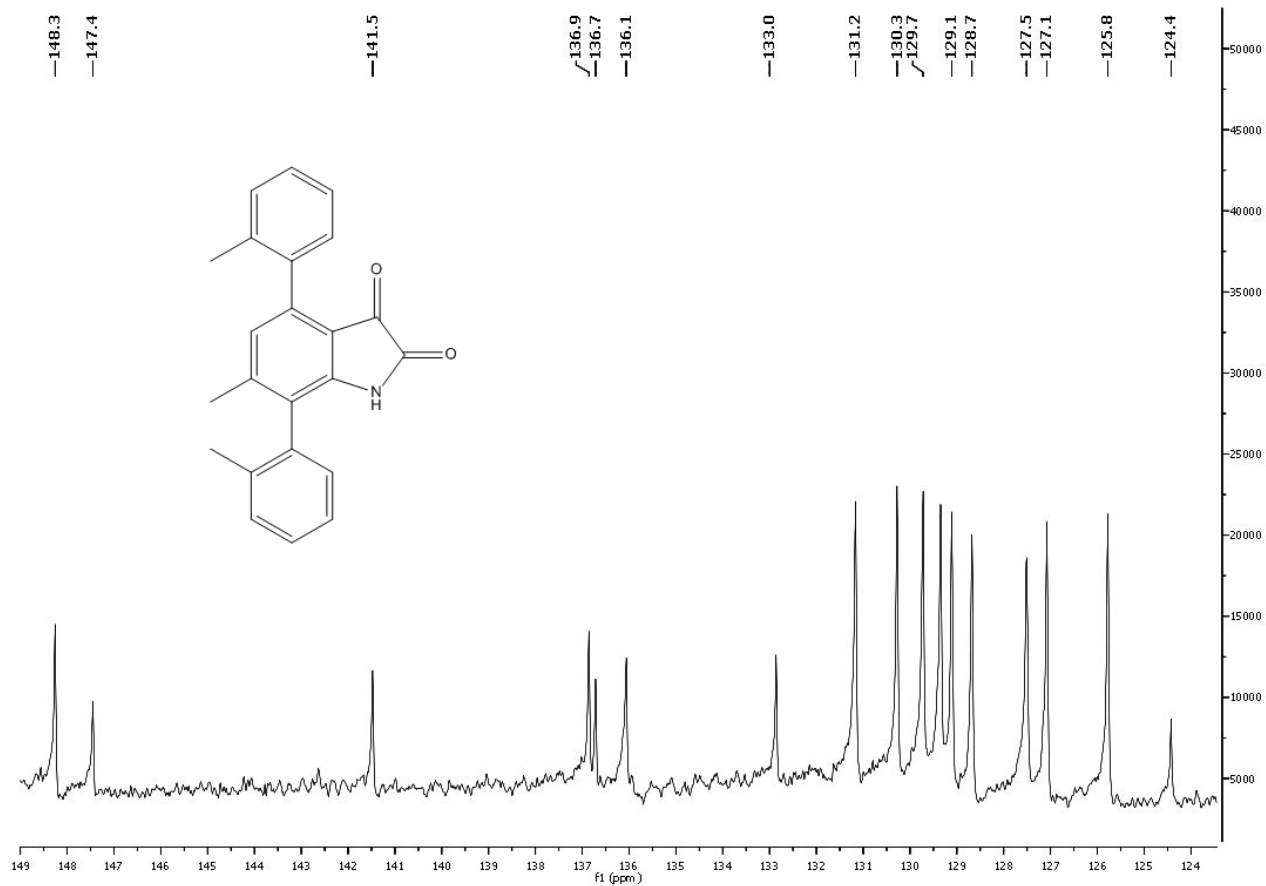



### 11.3 2-Amino-4-methyl-3,6-bis(*o*-tolyl)benzoic acid (12a)

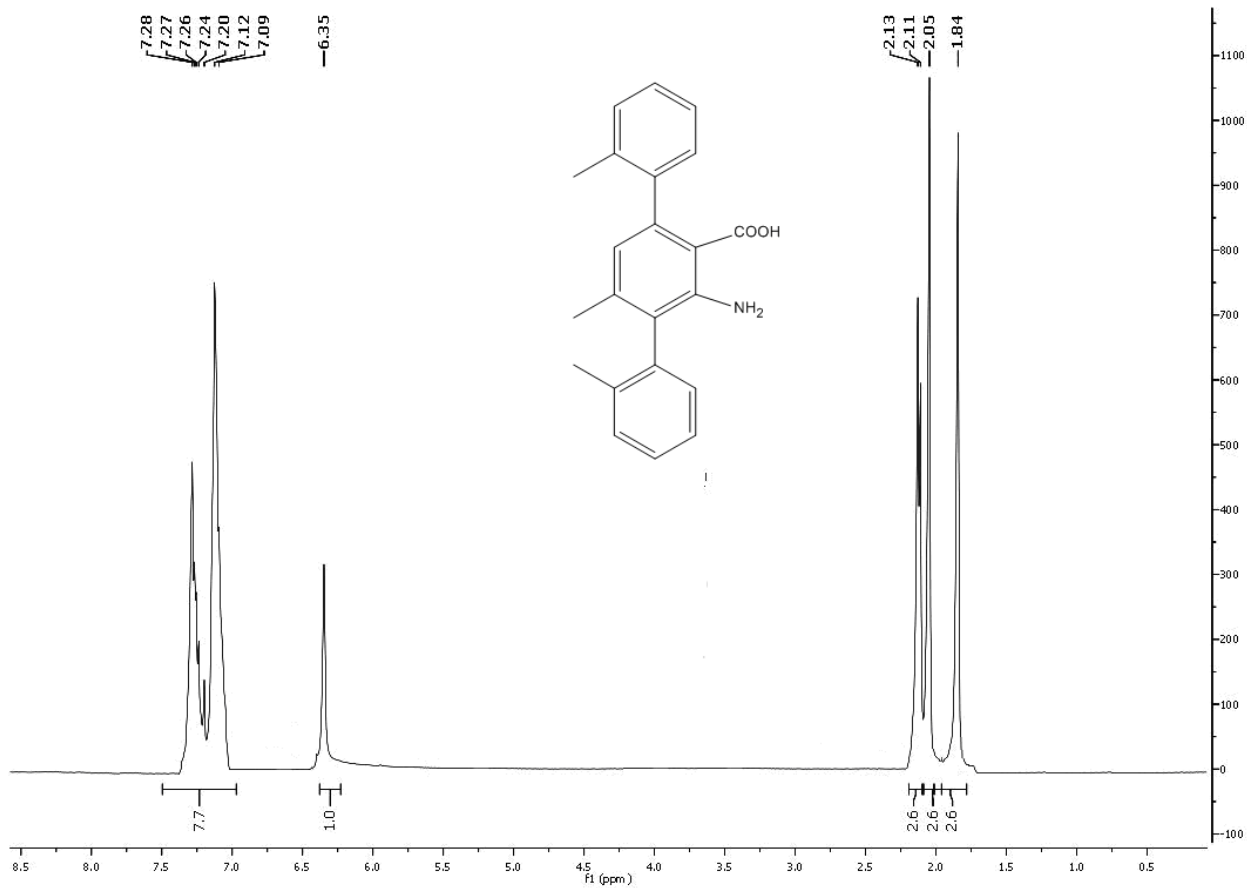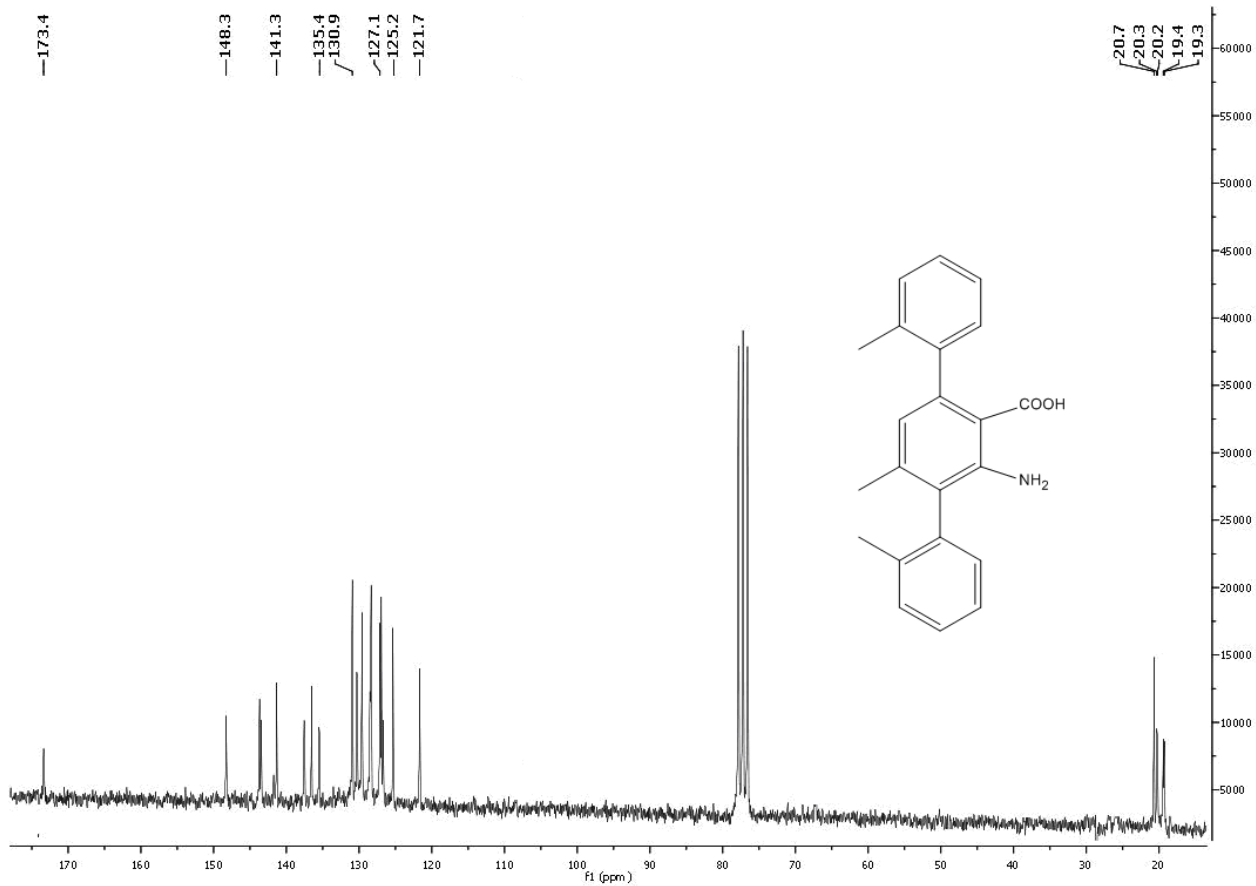

### Expansion between 23-15 ppm

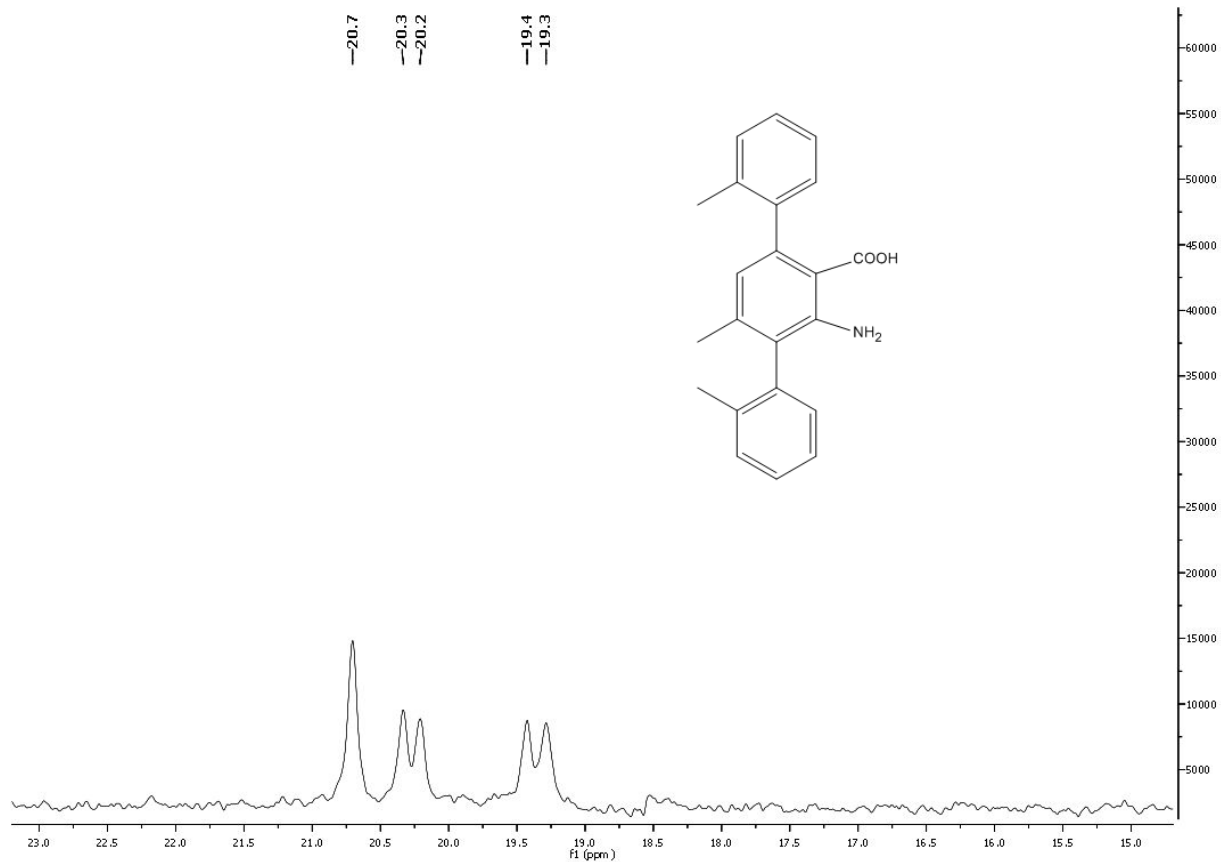

### Expansion between 149-120 ppm

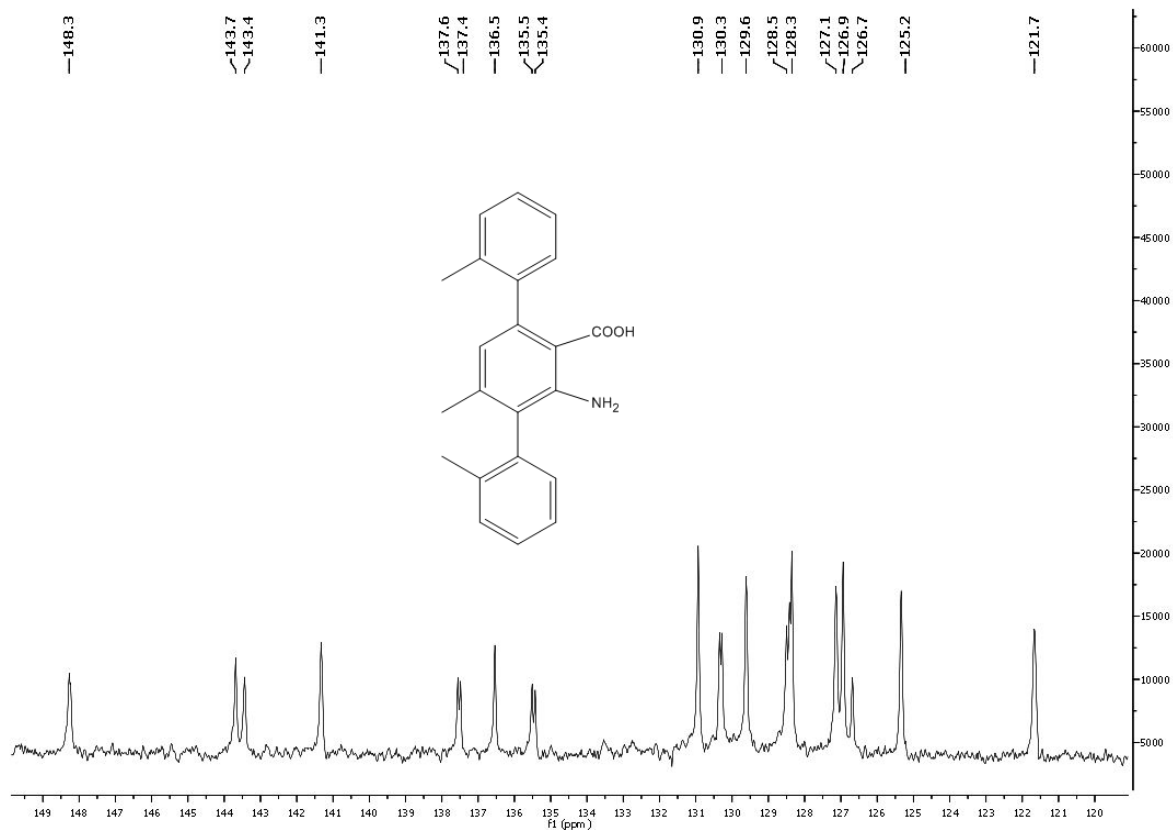

### 11.4 5-Methyl-2-(3-methylbutoxy)-4,7-bis(*o*-tolyl)-1,3-benzodithiole (13a)

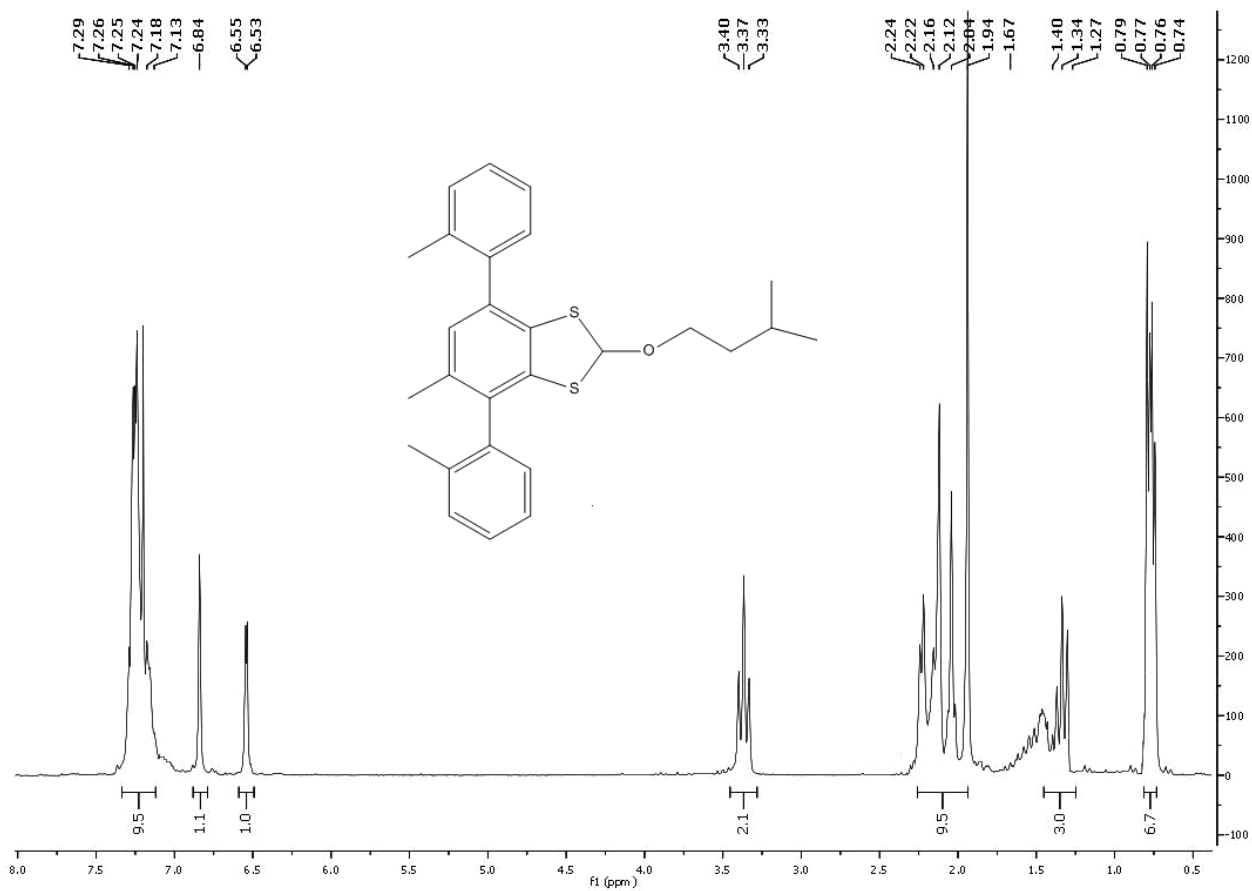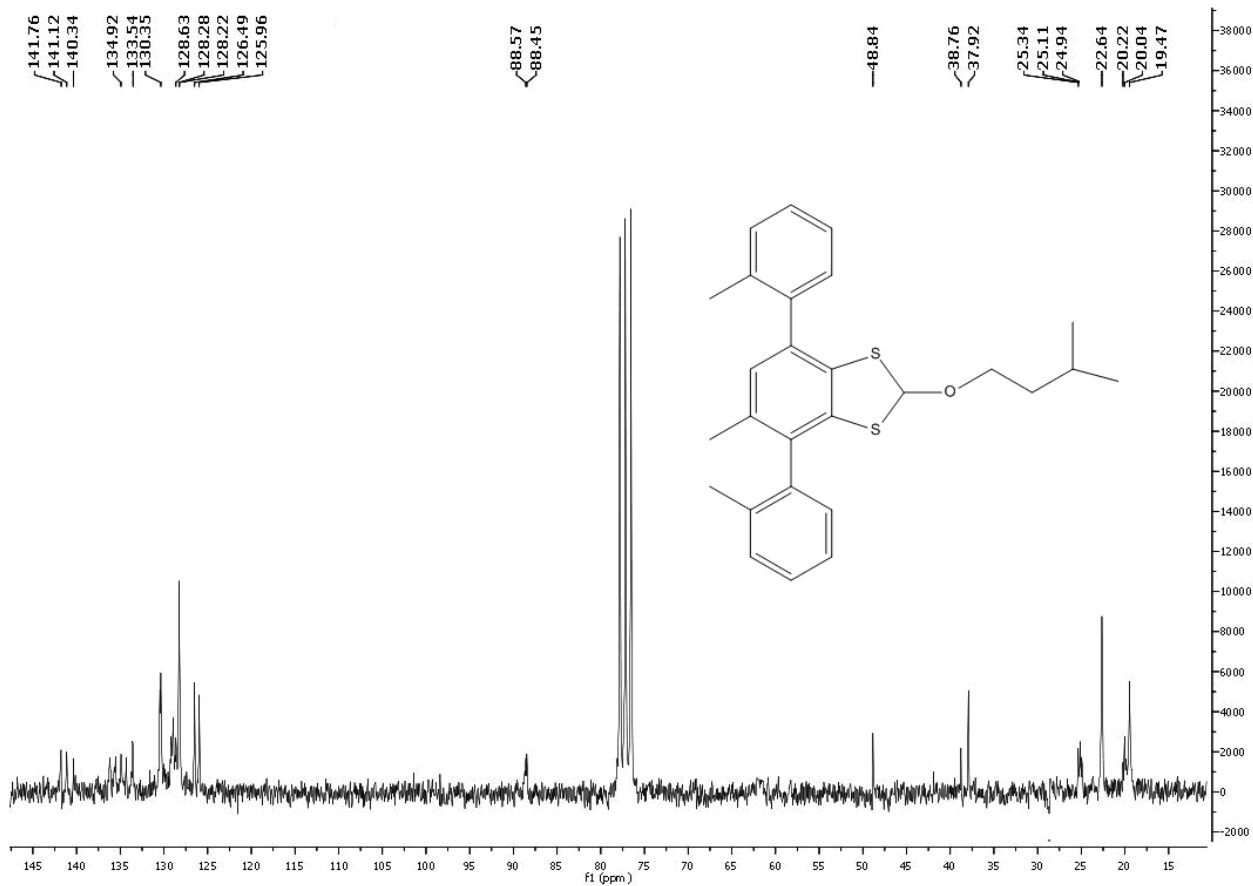

### Expansion between 142-125 ppm

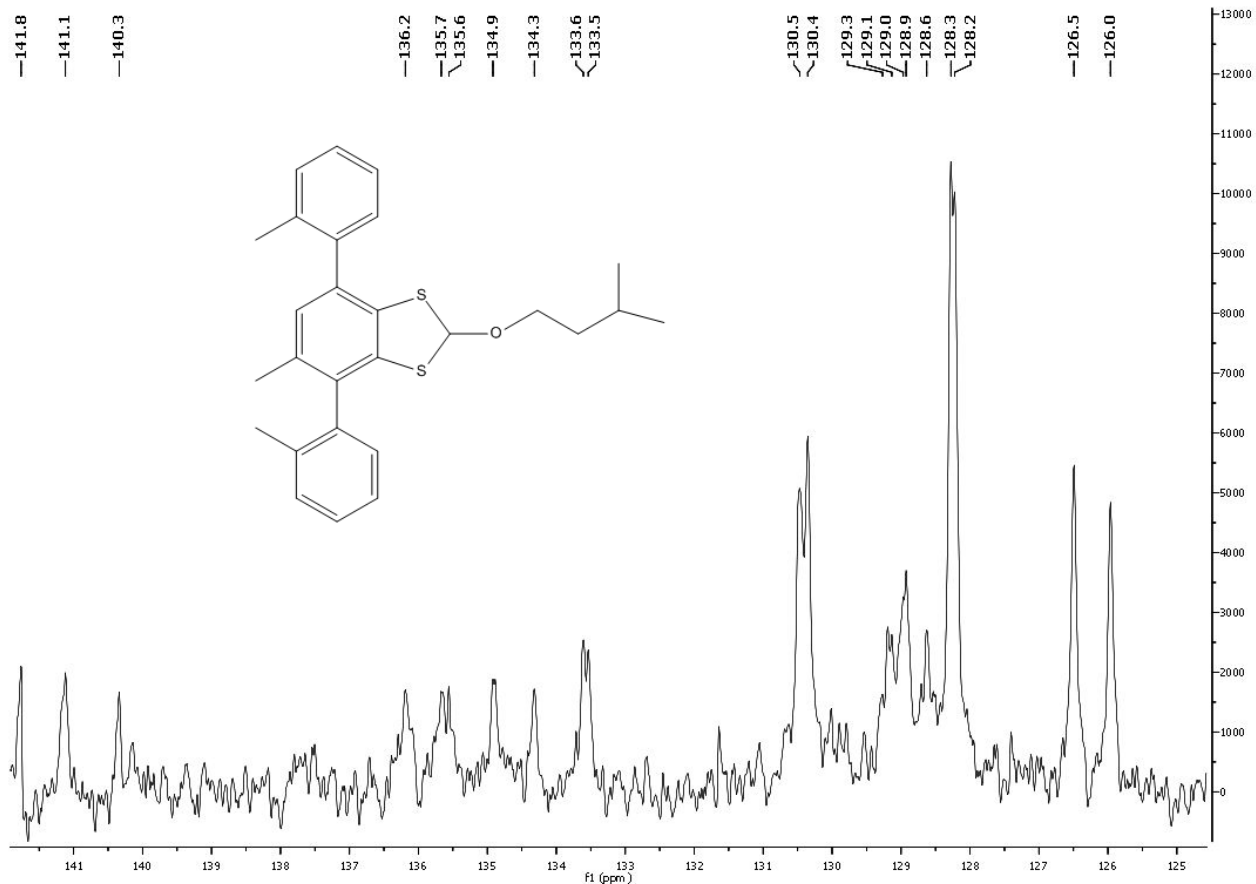

### Expansion between 50-10 ppm

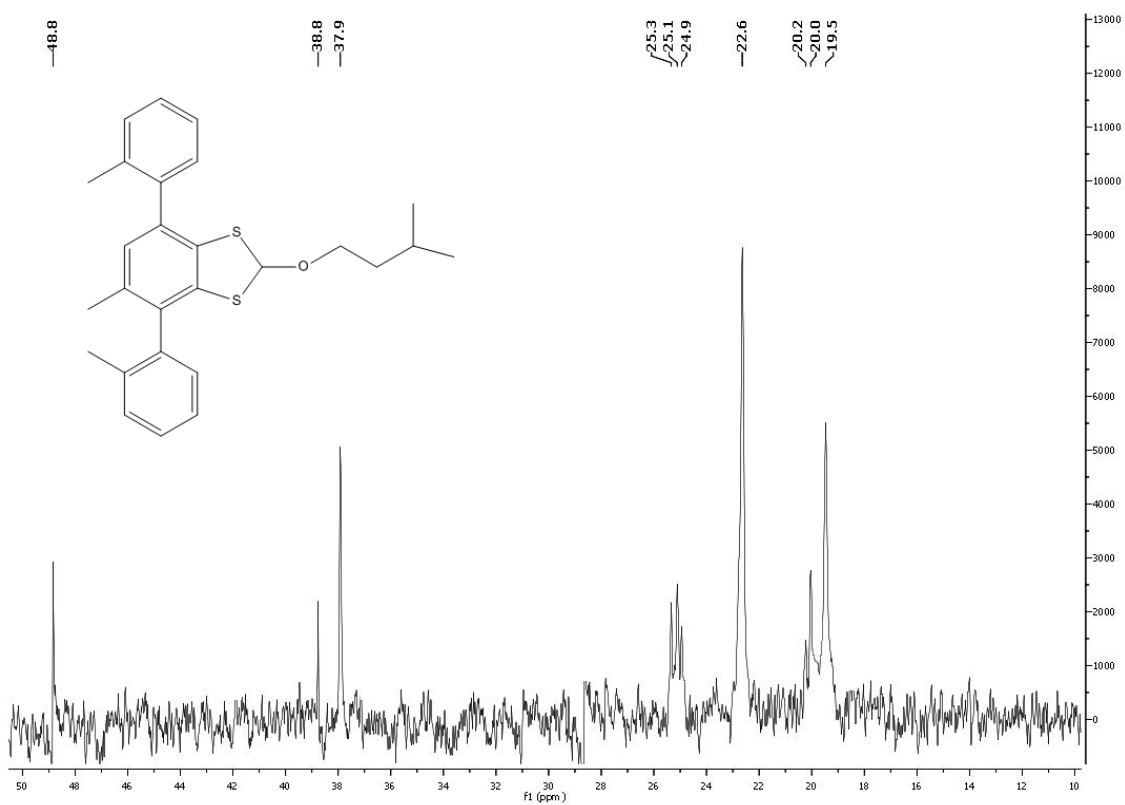

### 11.5 4-Methyl-3,6-bis(*o*-tolyl)-1,2-benzenedisulfonyl chloride (racemic mixture; 14a)

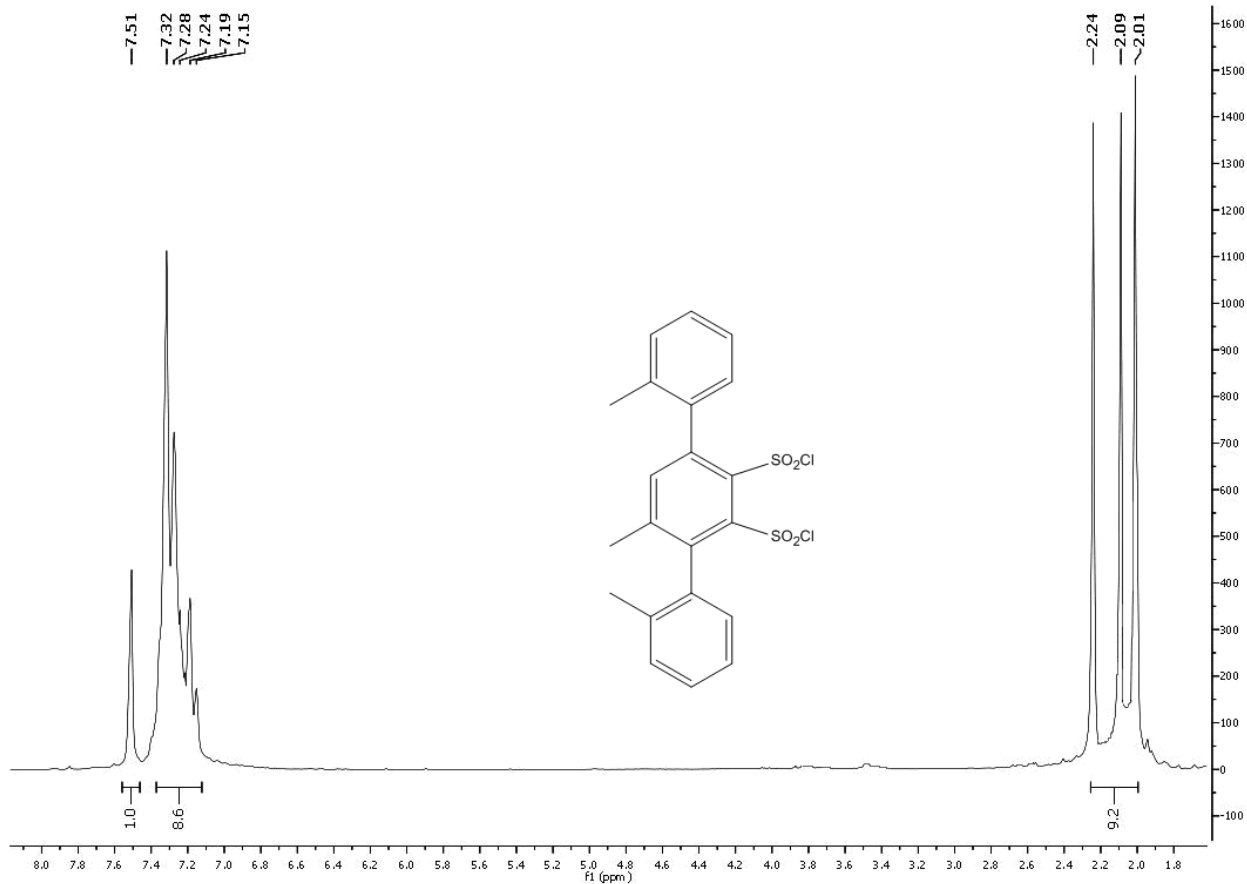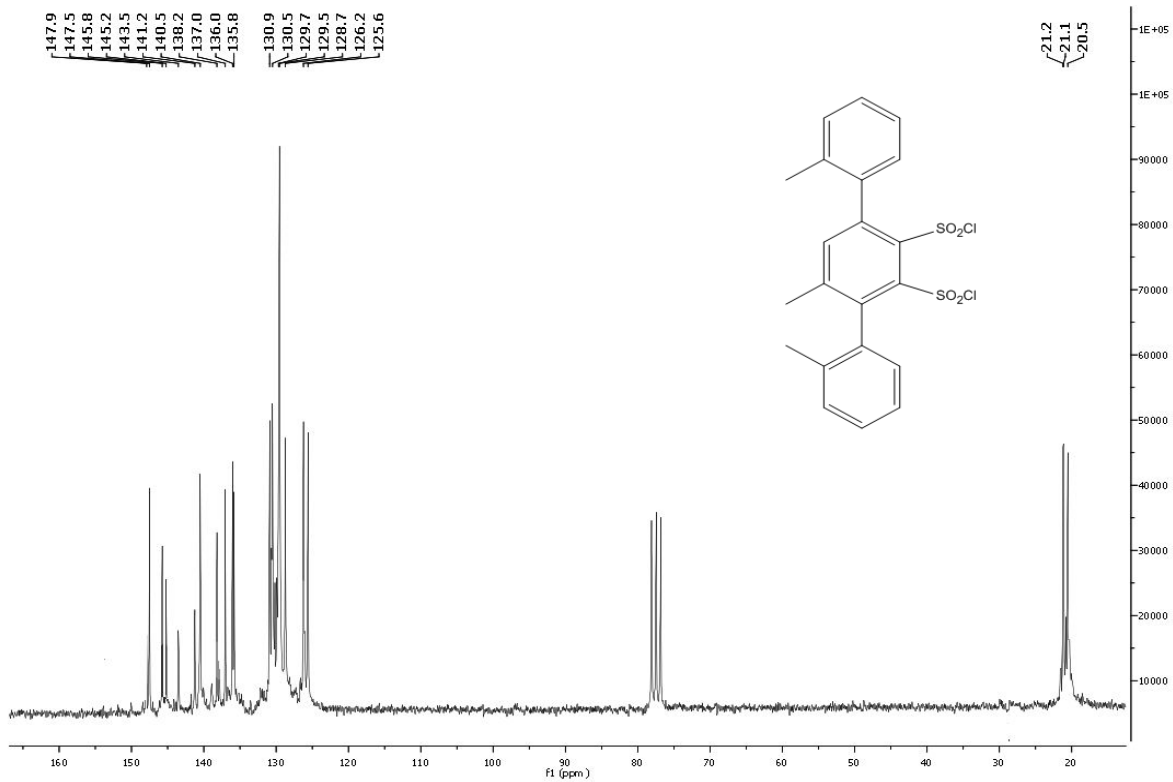

## Expansion between 148-124 ppm

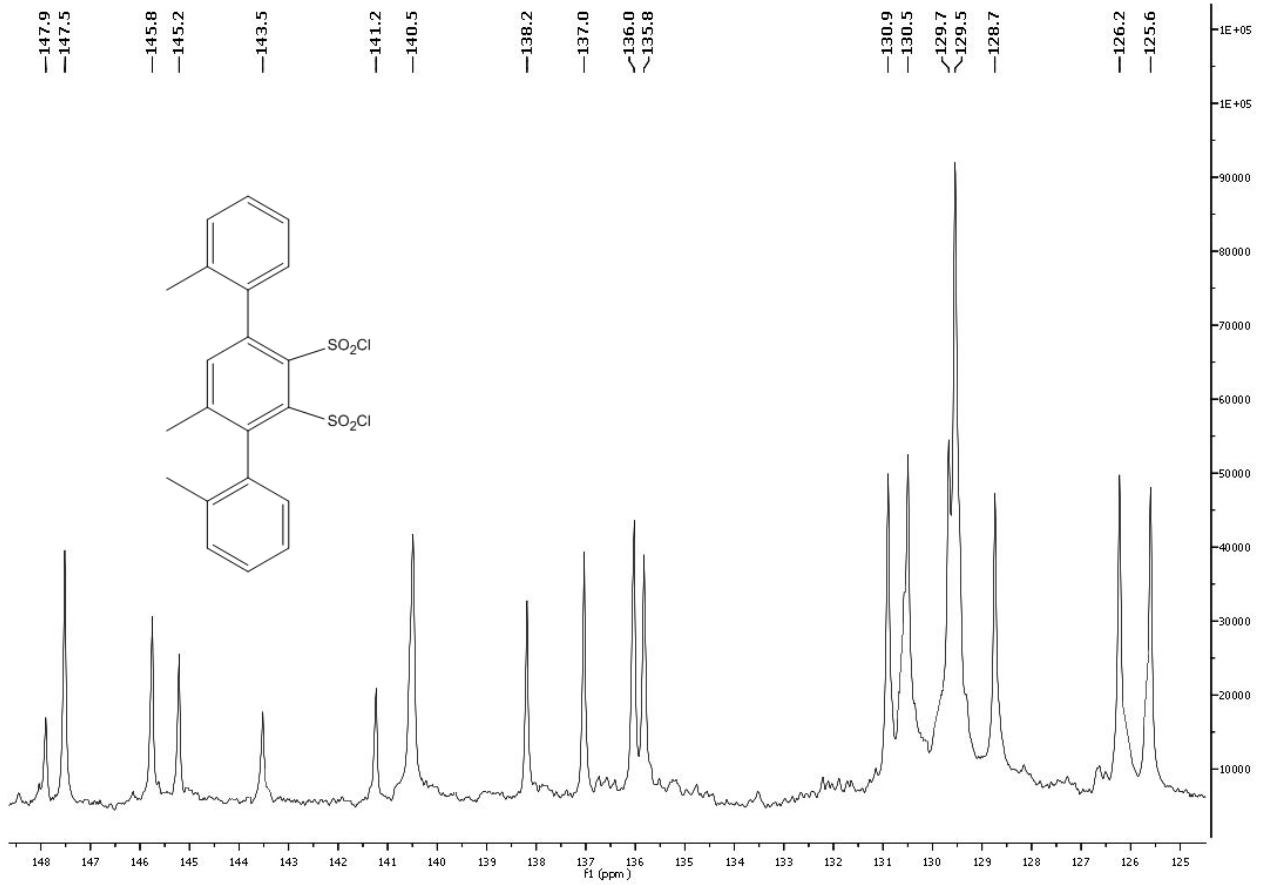

## Expansion between 23-18 ppm

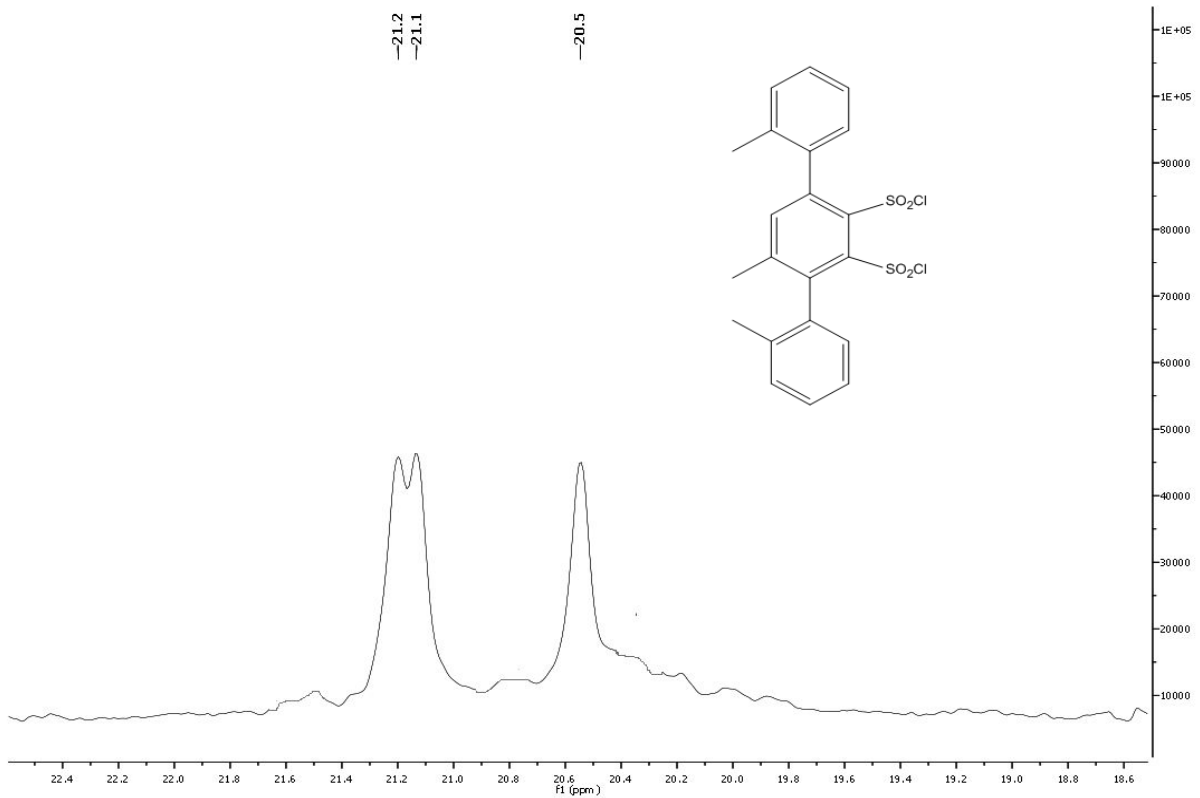

11.6 (-) 4-Methyl-3,6-bis(*o*-tolyl)-1,2-benzenedisulfonyl chloride (14a)

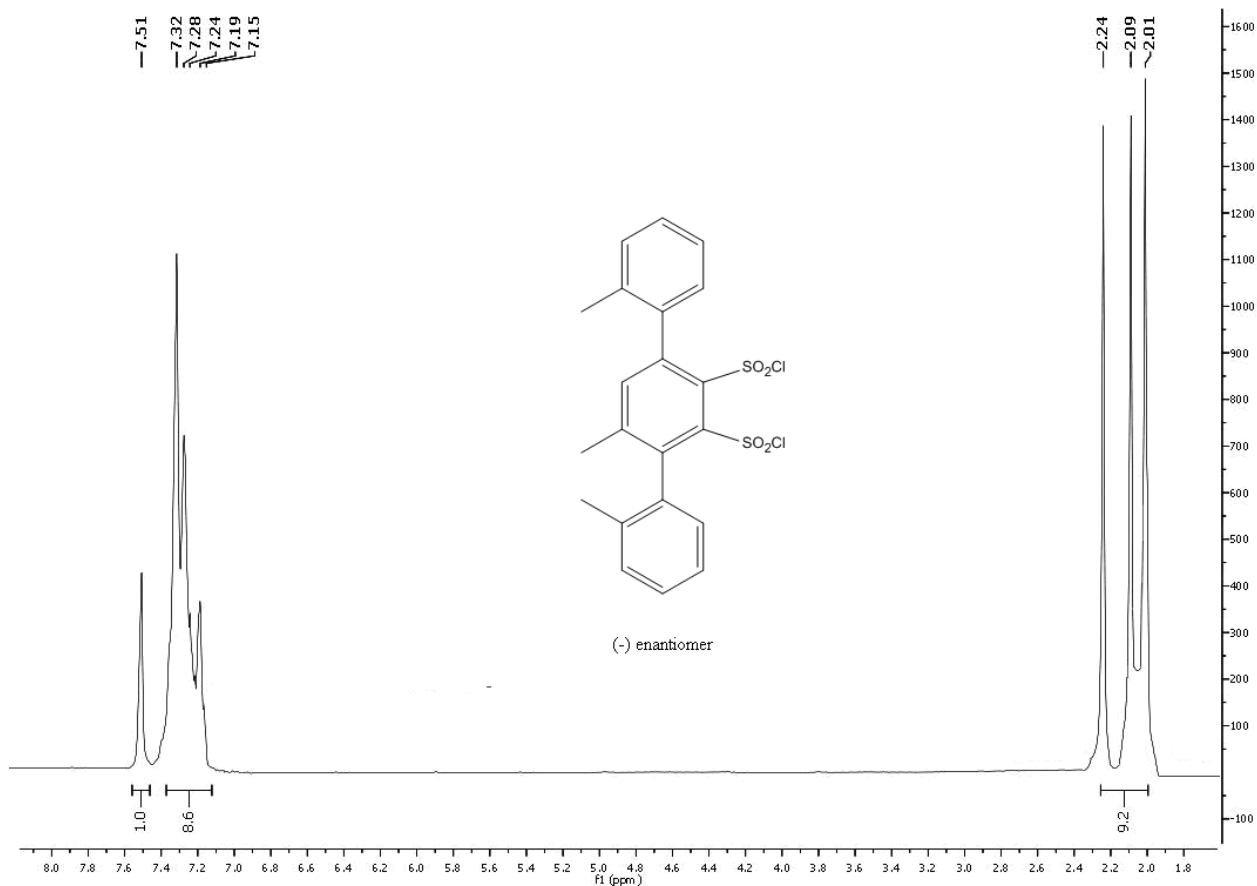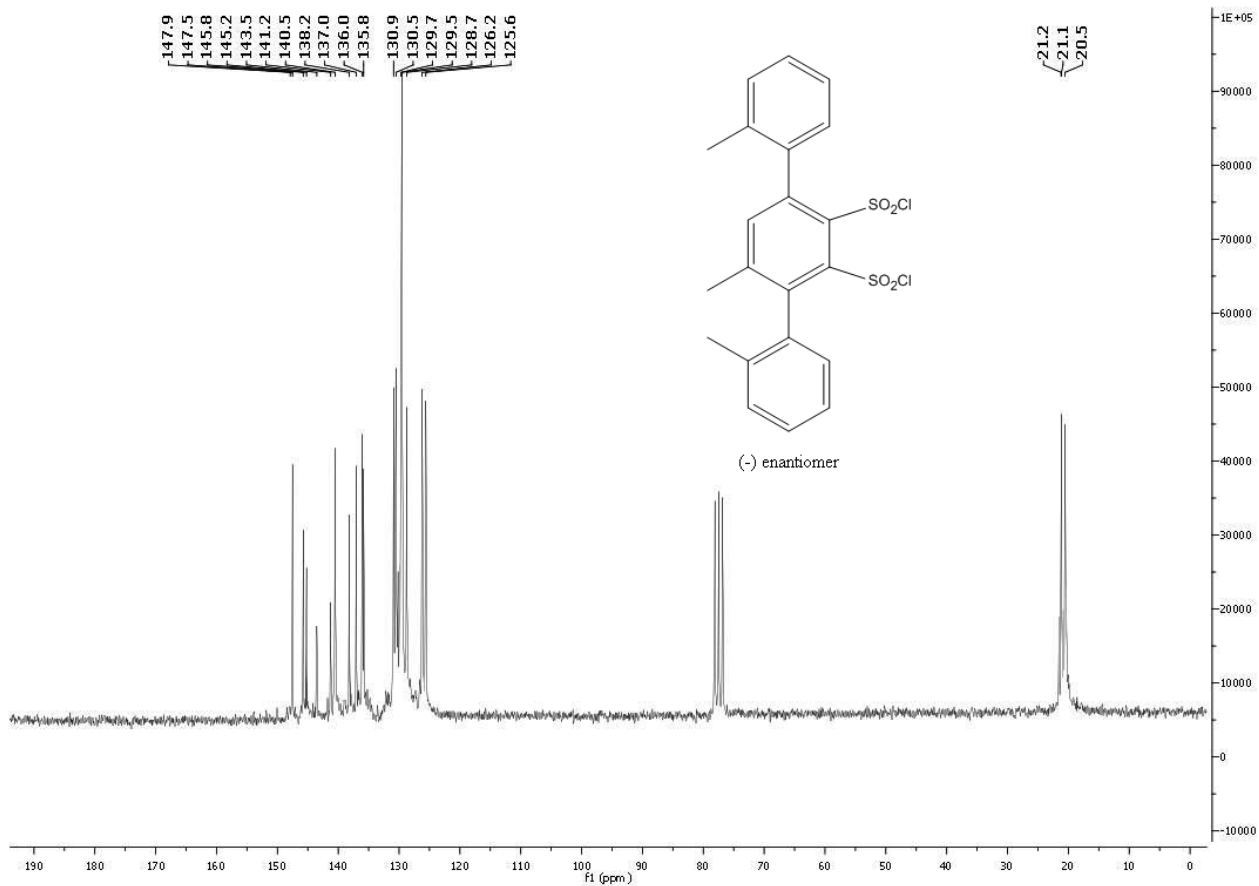

### 11.7 4-Methyl- 3,6-bis(*o*-tolyl)-1,2-benzenedisulfonimide (3a); racemic mixture

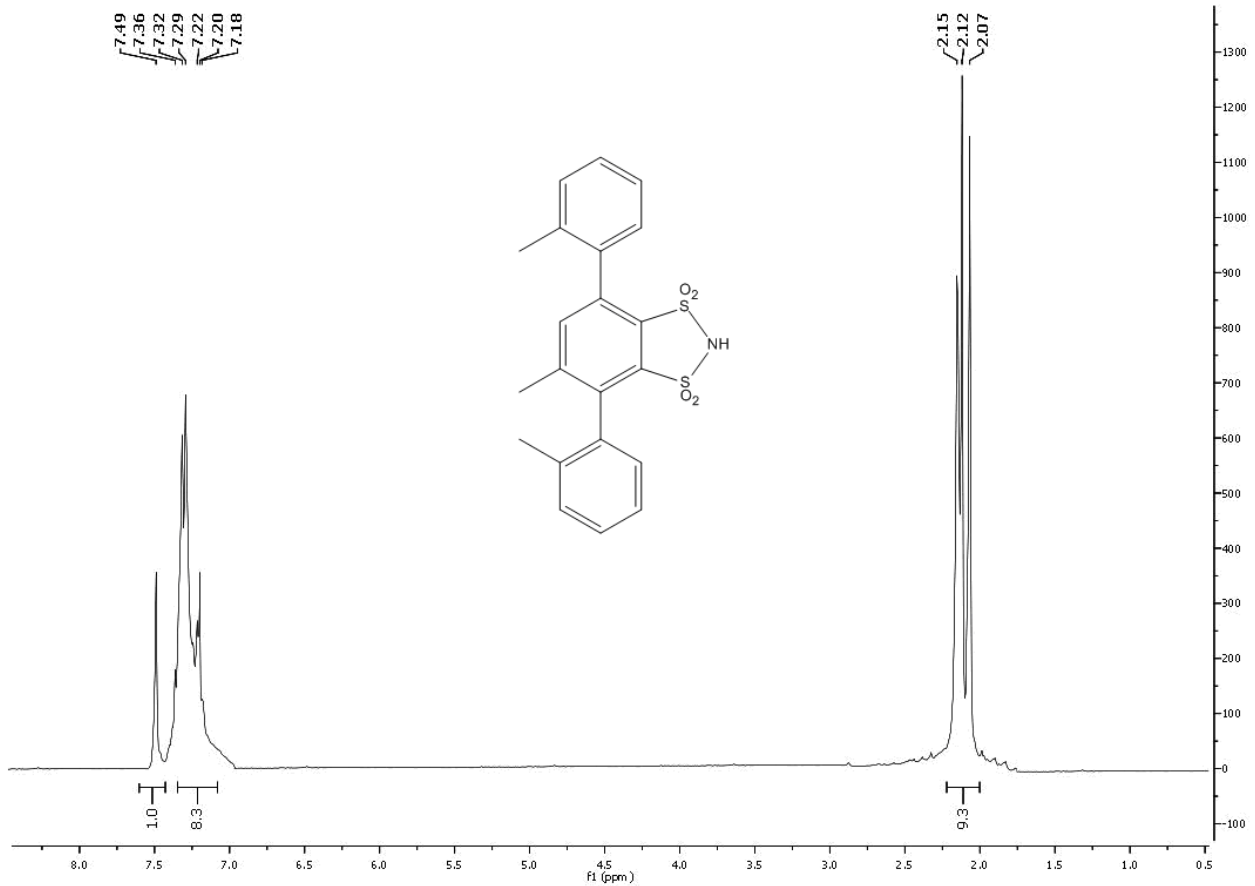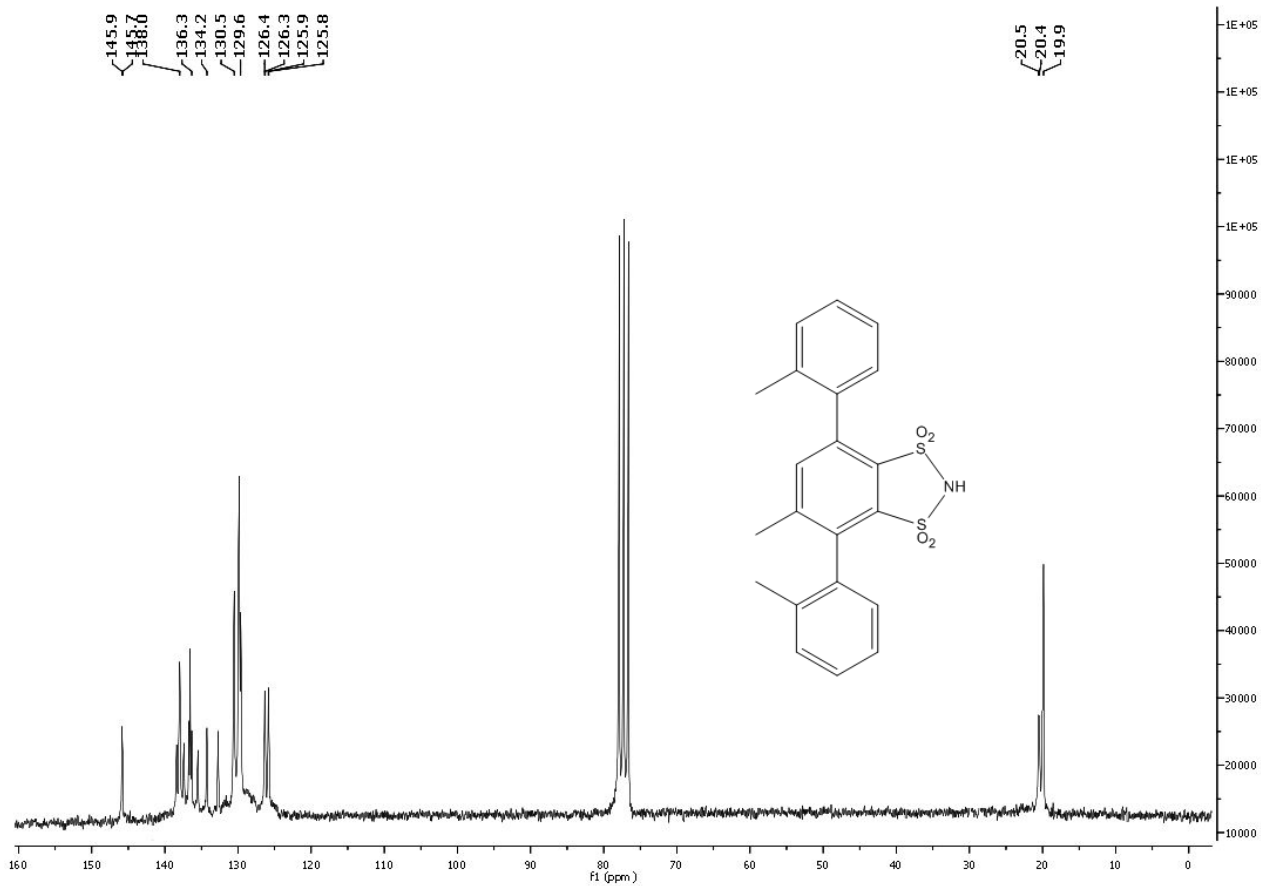



### Expansion between 148-124 ppm

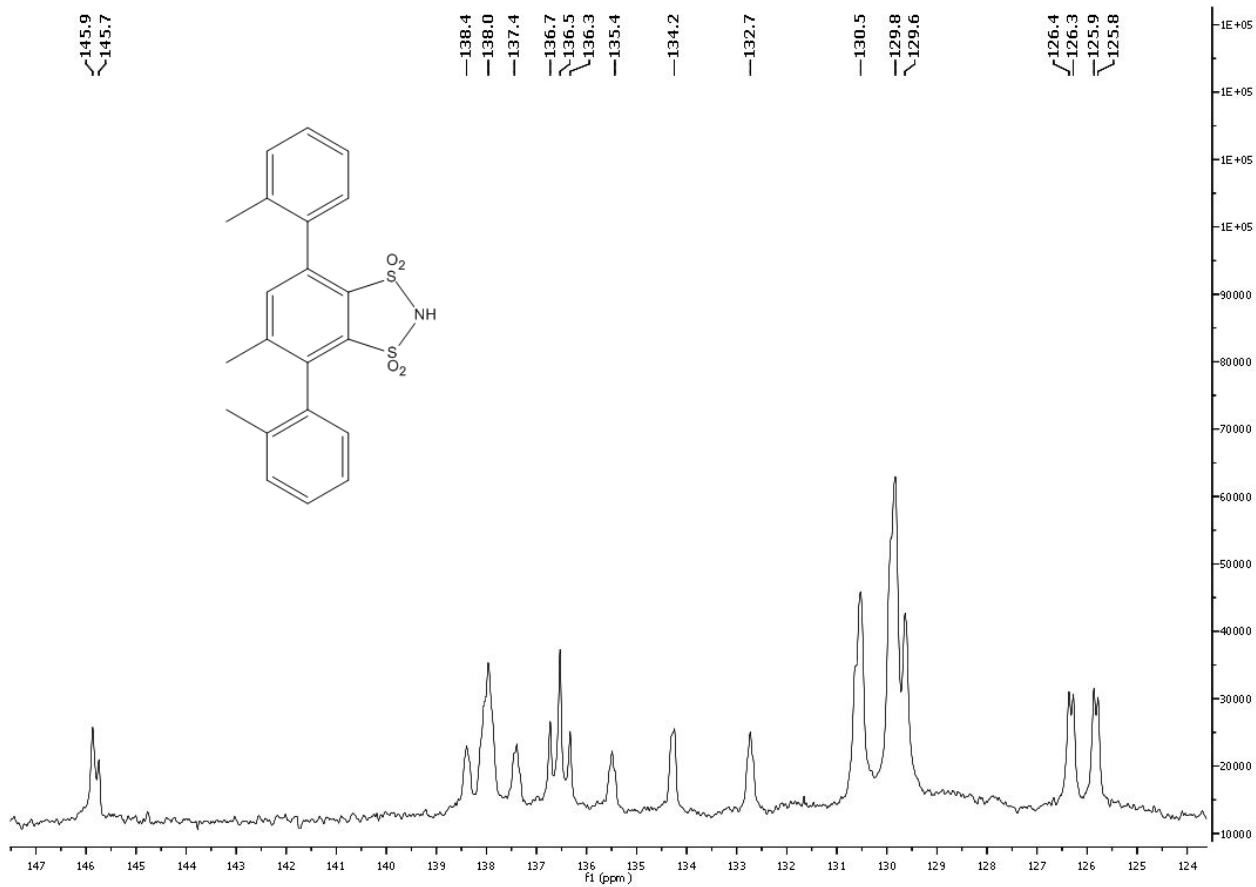

### Expansion between 21-16 ppm

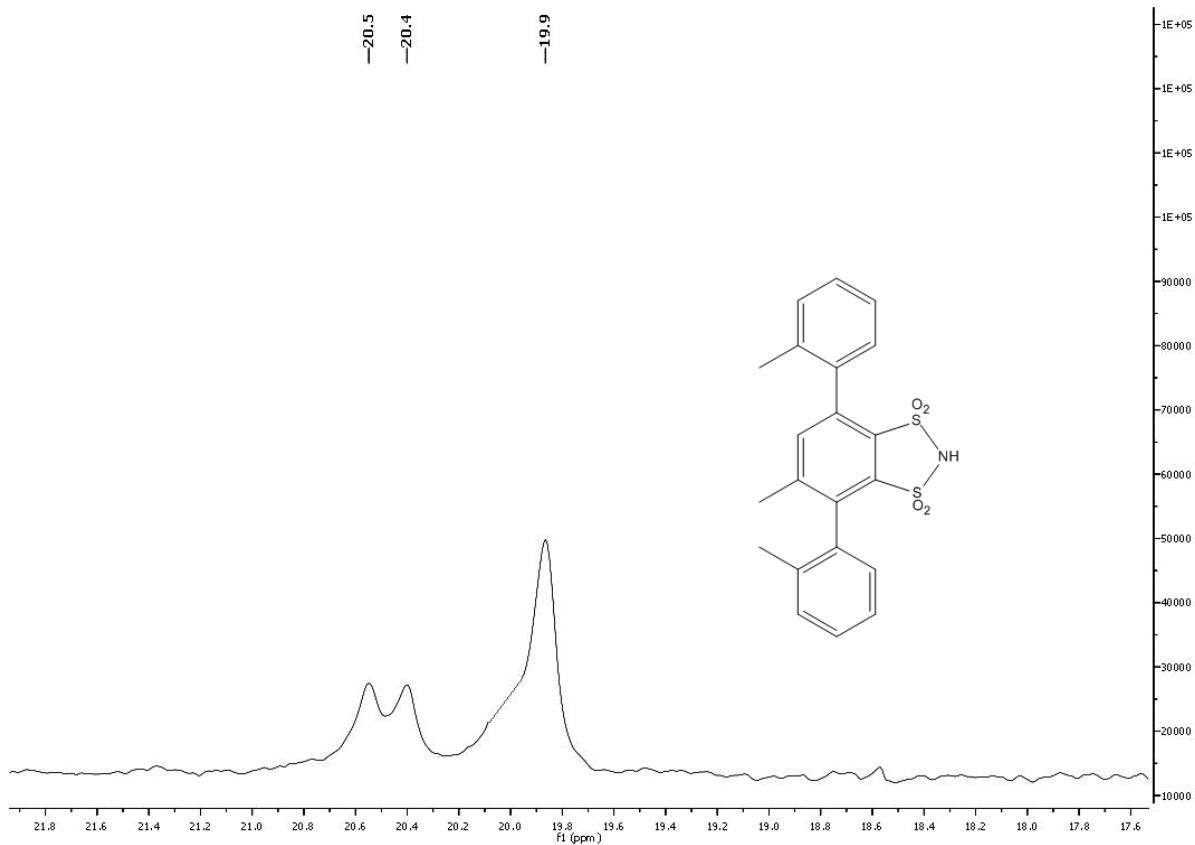

11.8 (-) 4-Methyl-3,6-bis(*o*-tolyl)-1,2-benzenedisulfonimide (3a)

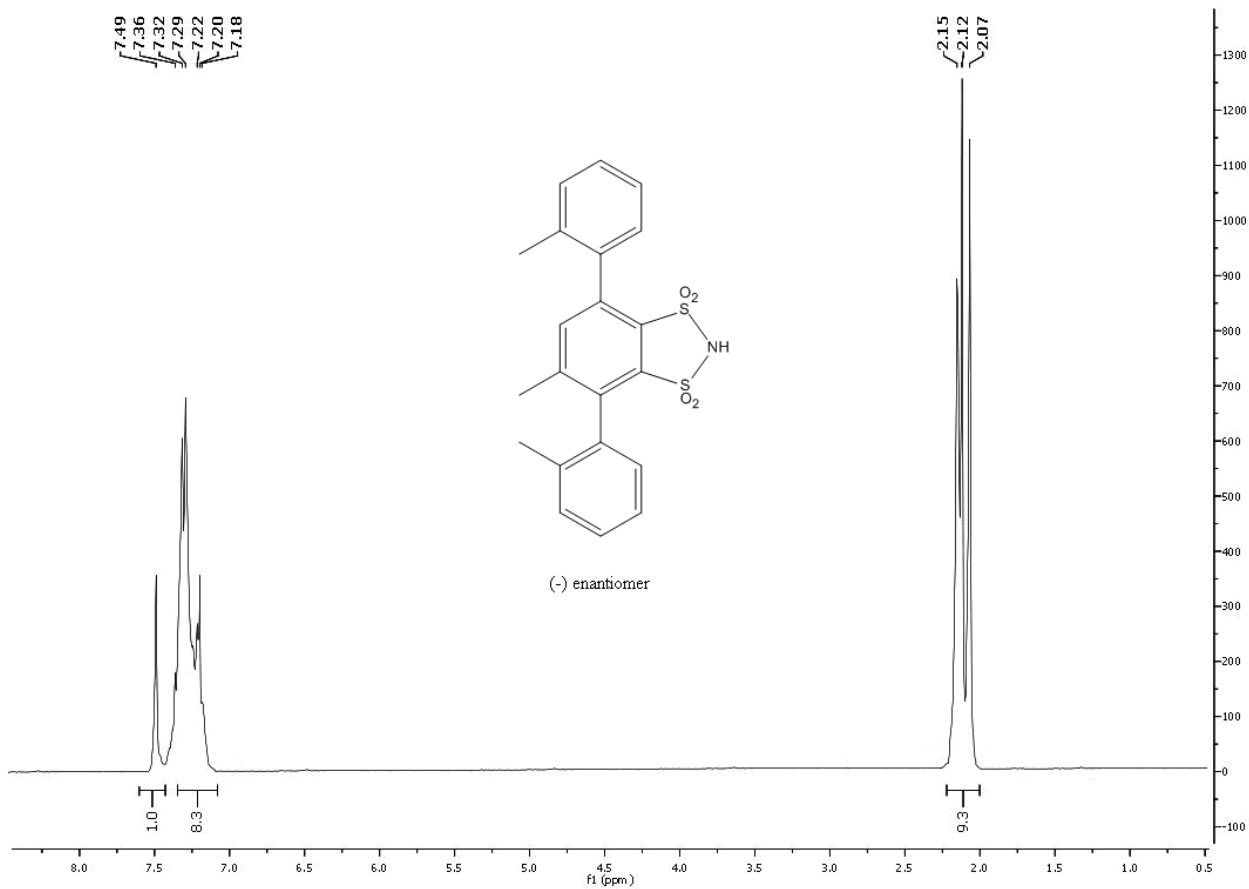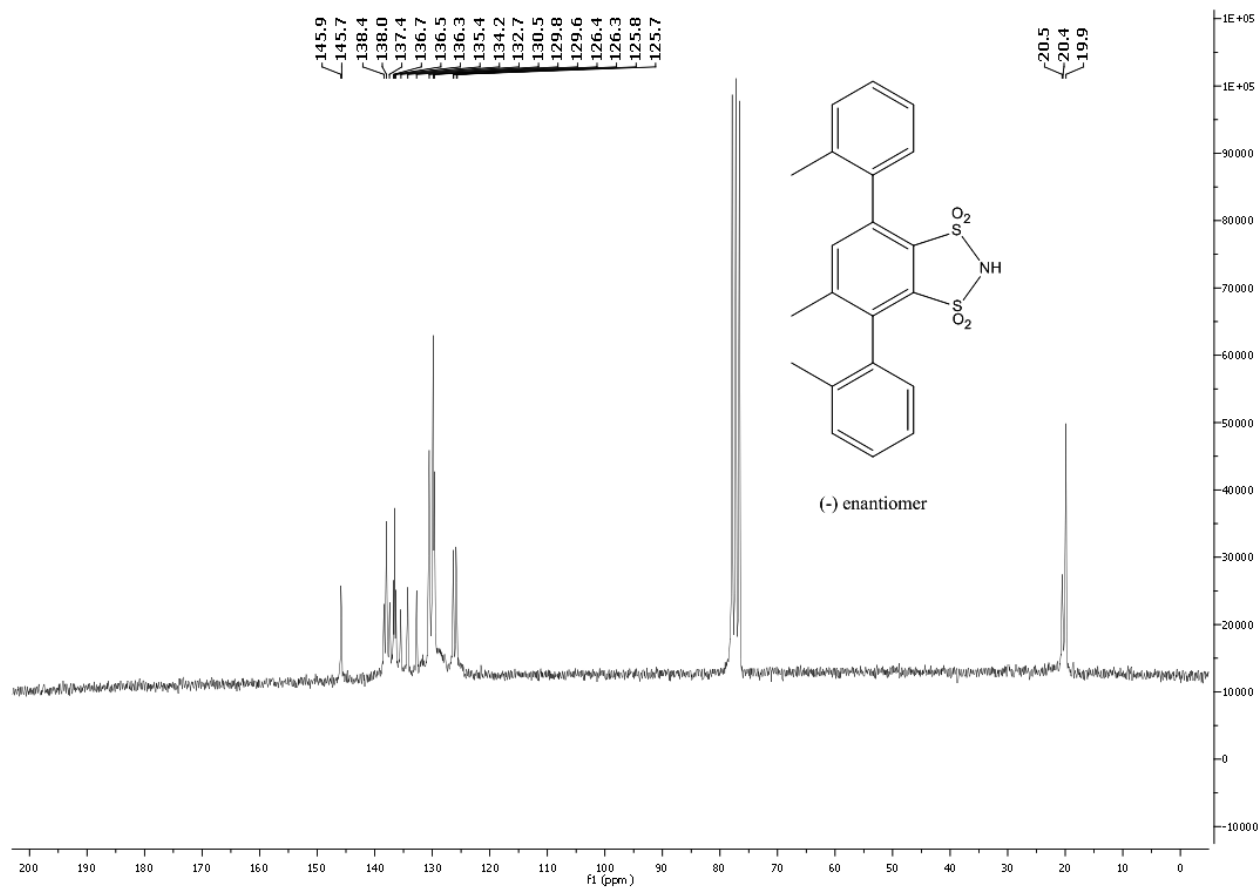

### 11.9 4-Iodo-5,6-dimethyl-2-nitroaniline (5b)

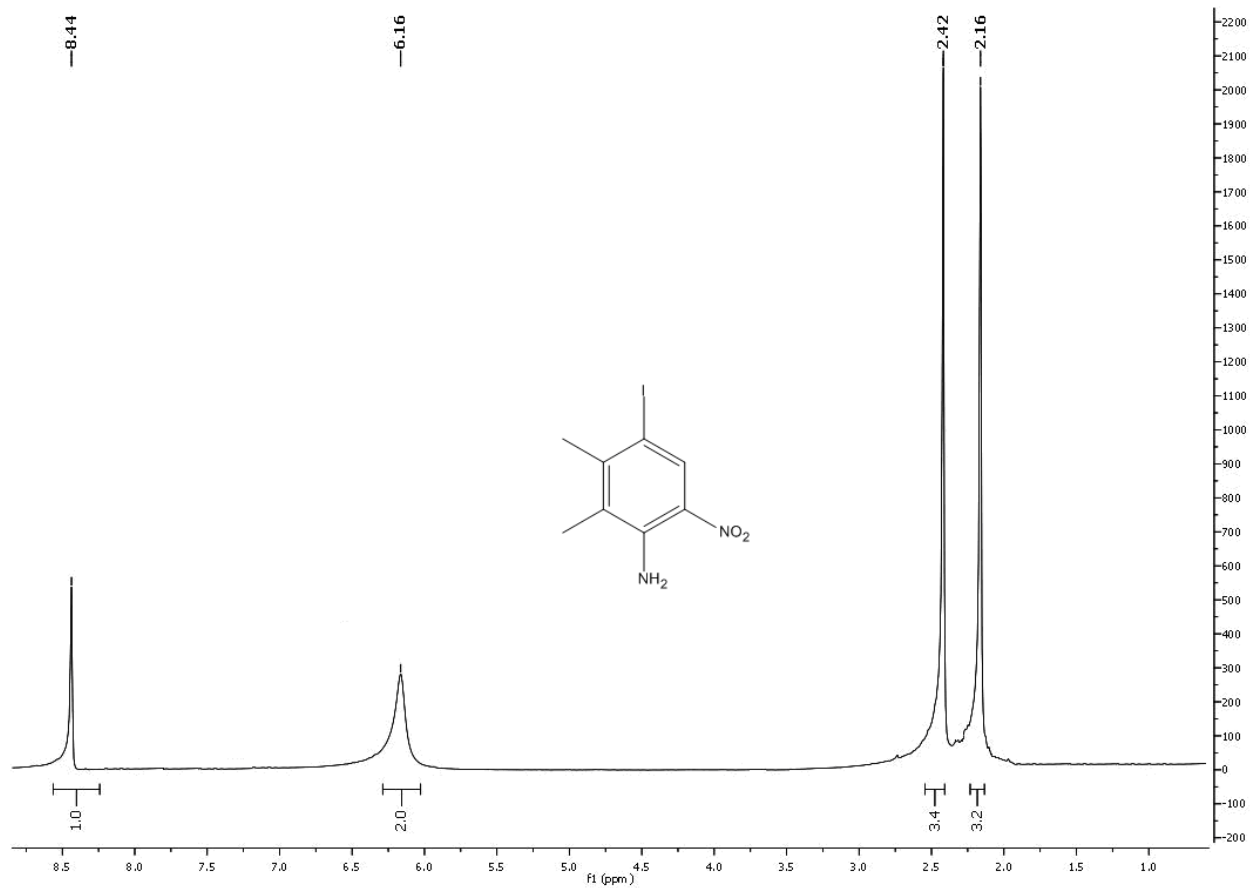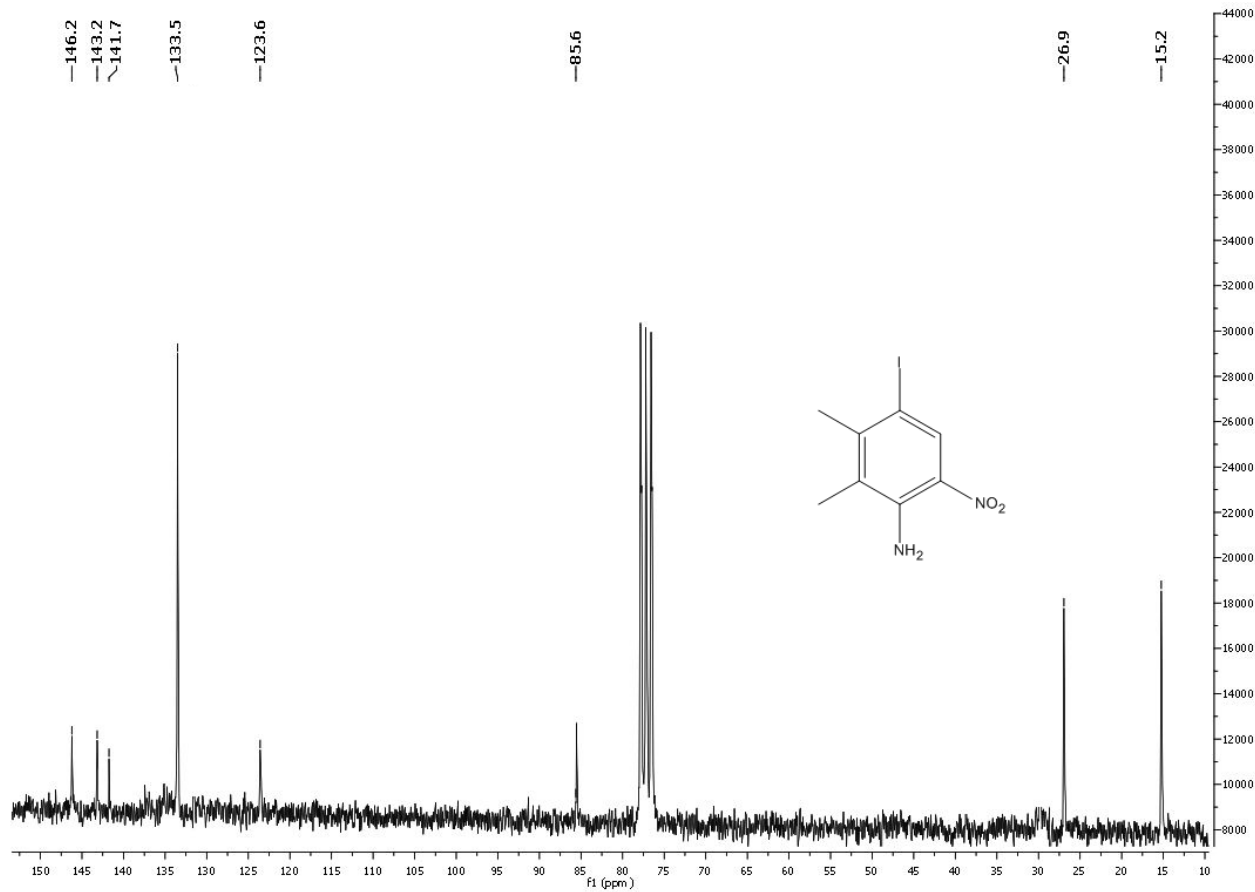

### 11.10 3,6-Diiodo-4-nitro-*o*-xylene (7b)

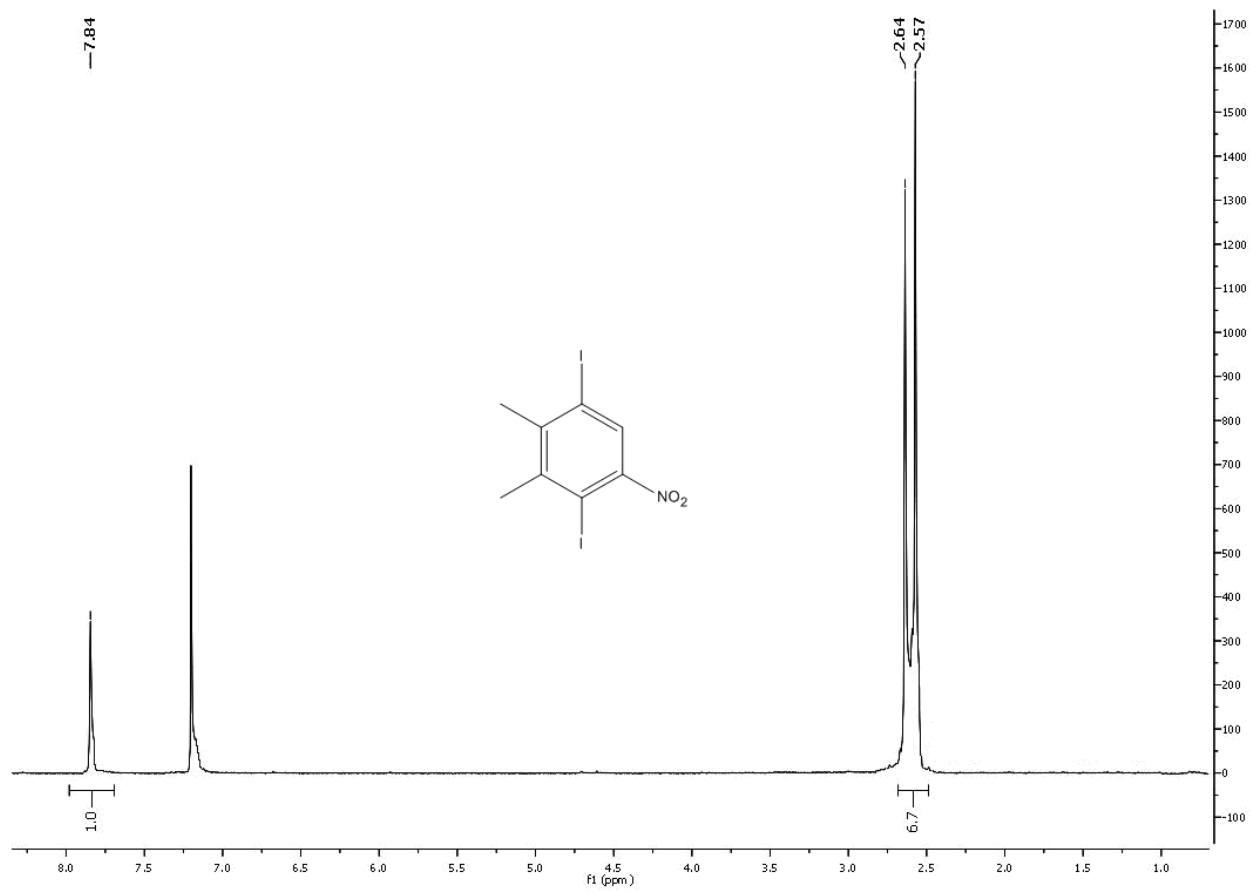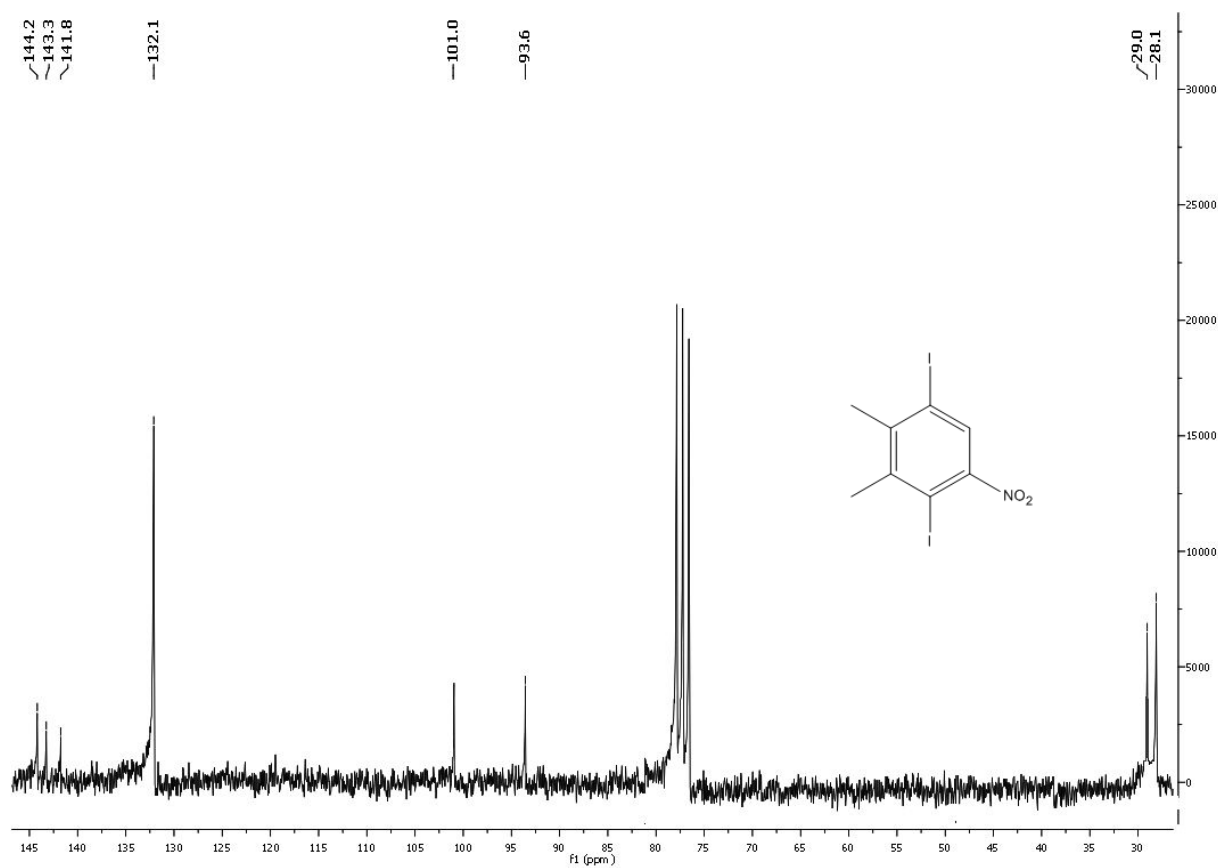

### 11.11 4-Nitro-3,6-bis(*o*-tolyl)benzene (15)

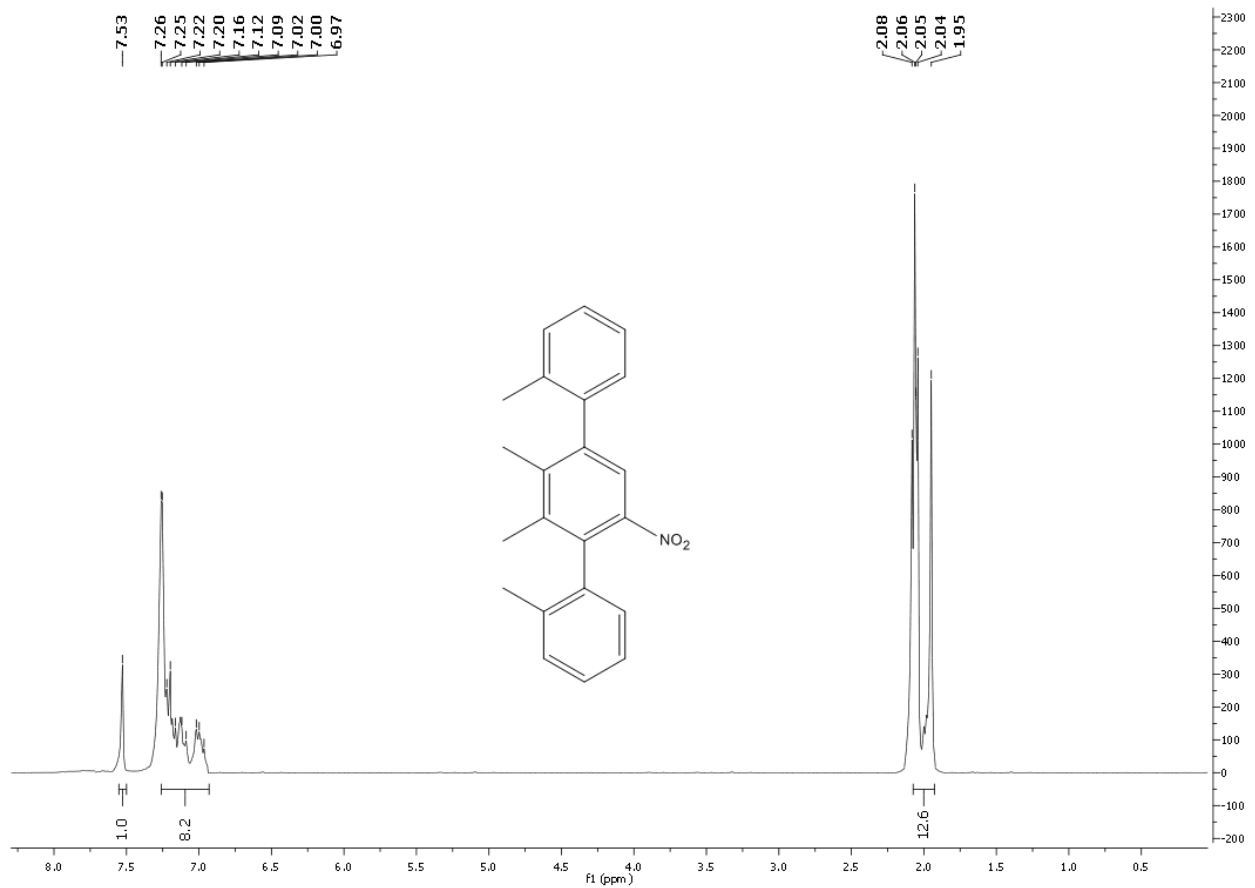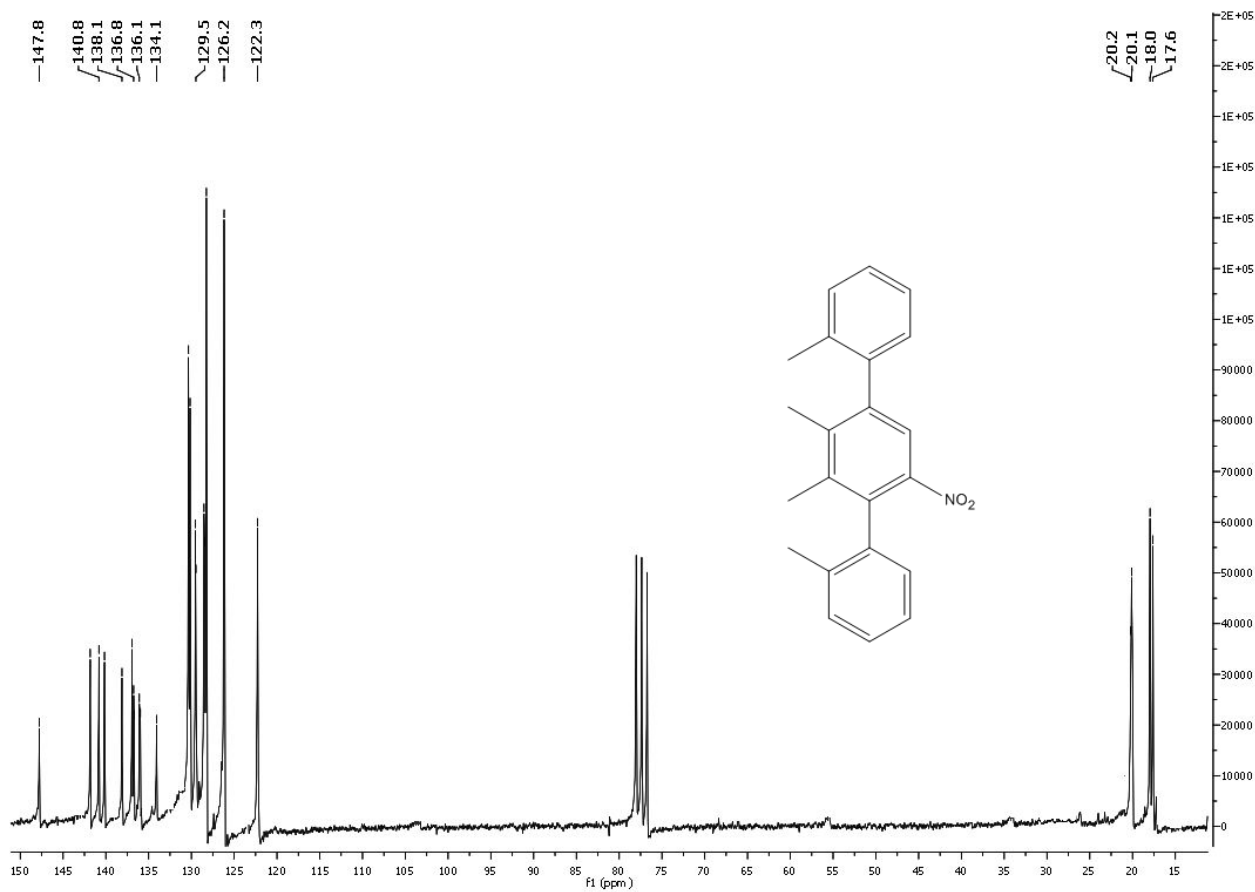

### Expansion between 148-120 ppm

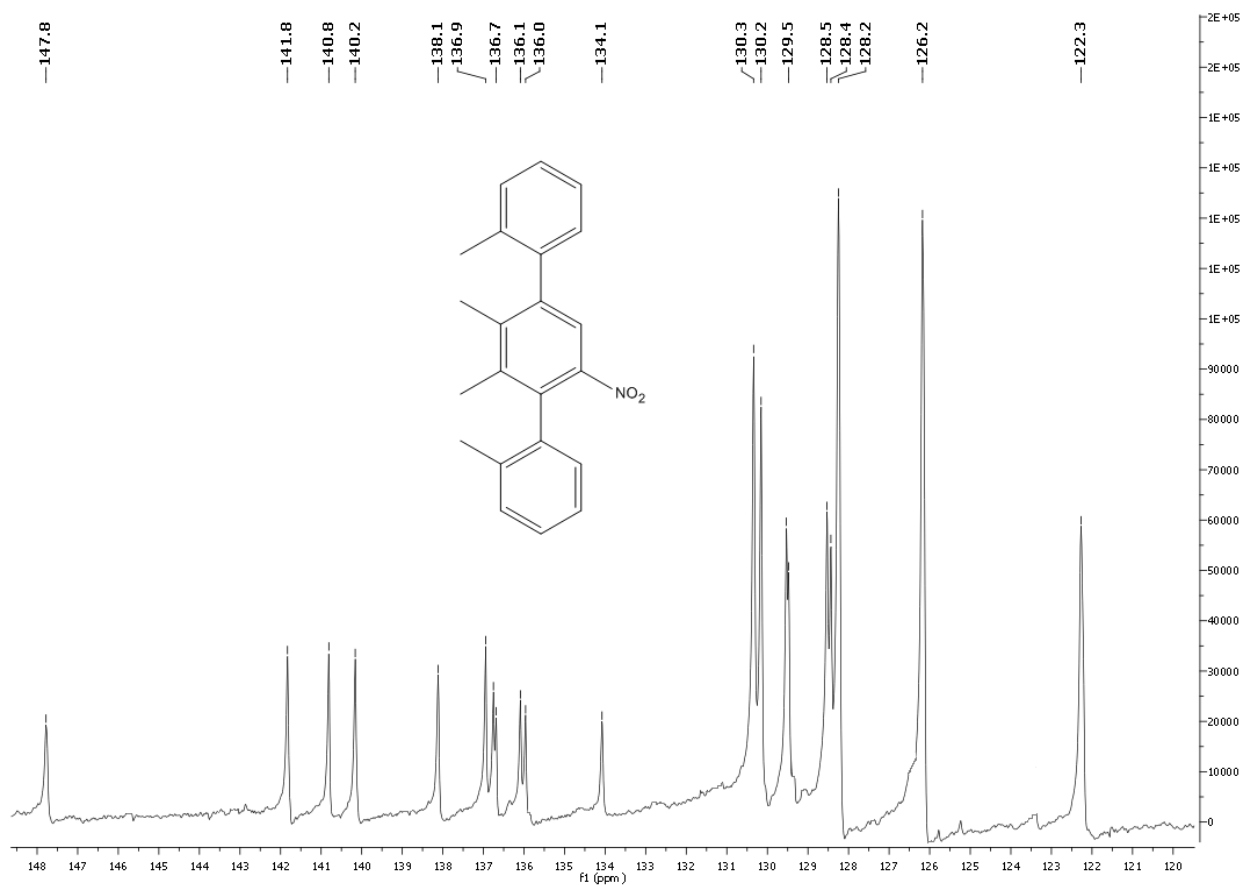

### Expansion between 22-15 ppm

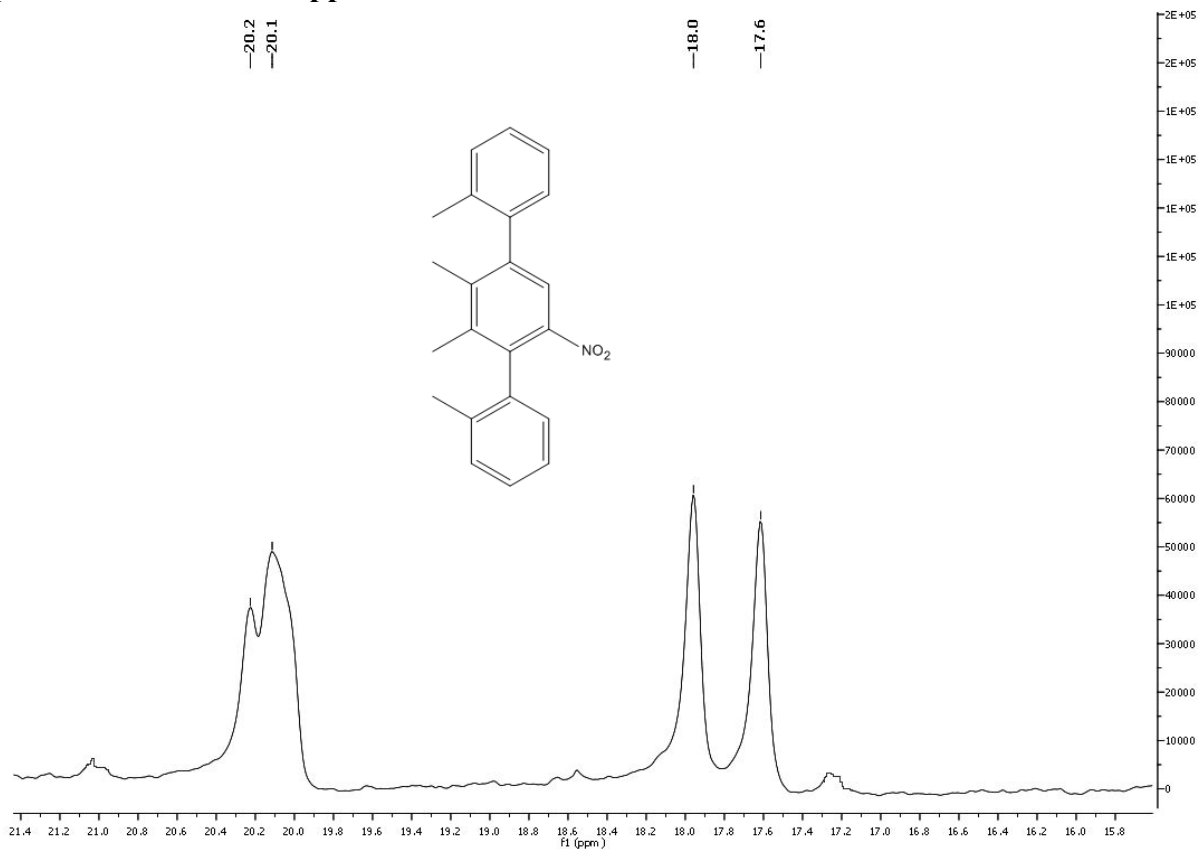

### 11.12 2,5-Diiodo-3,4-dimethylaniline (8b)

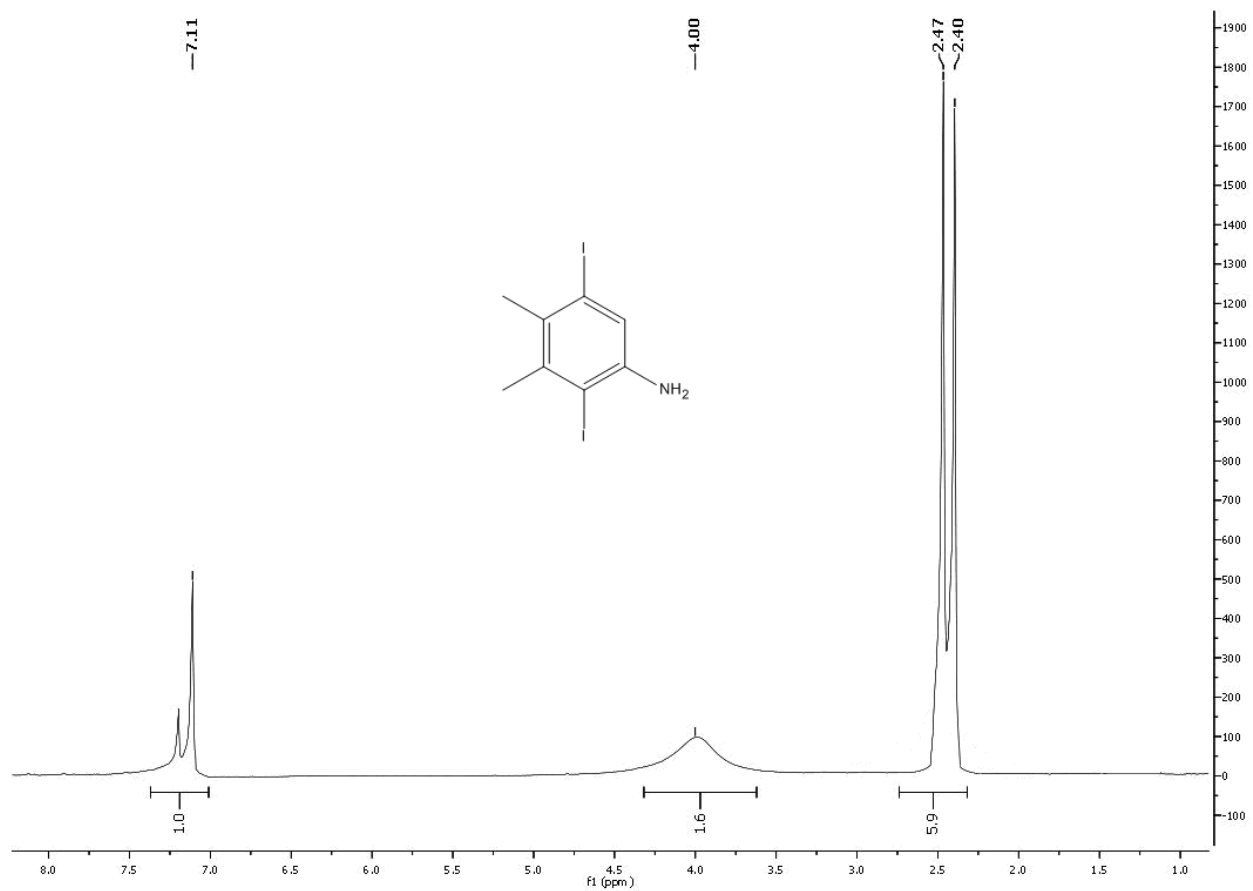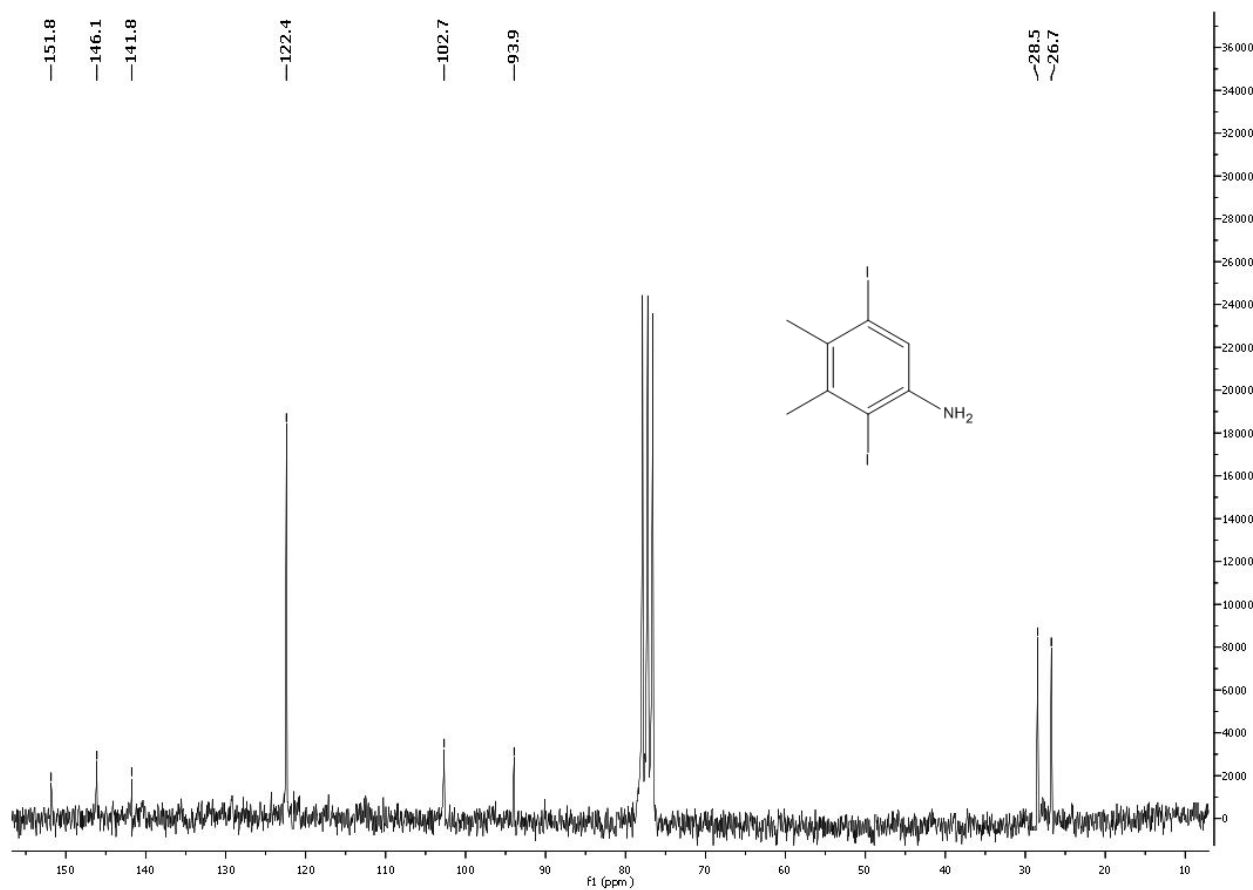

### 11.13 2,5-Bis(*o*-tolyl)-3,4-dimethylaniline (16)

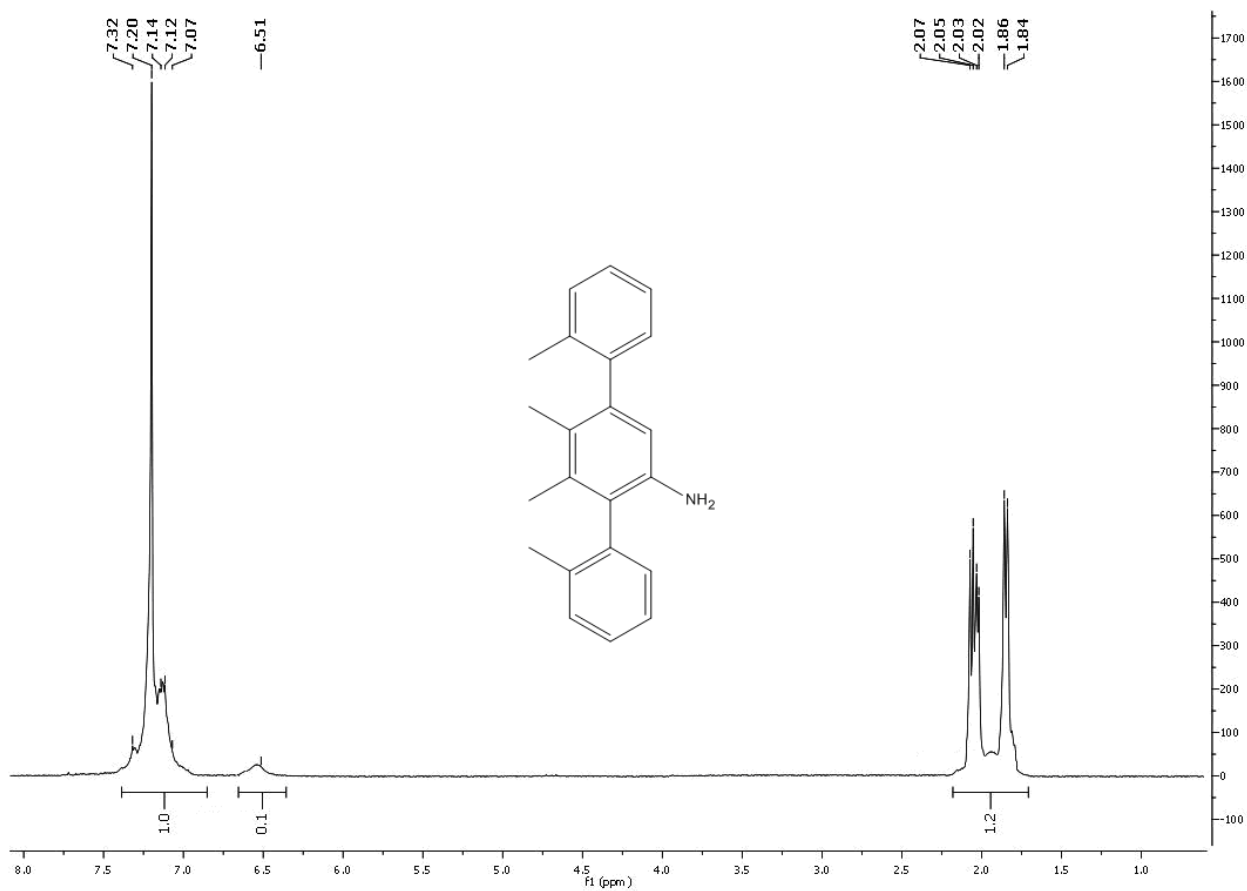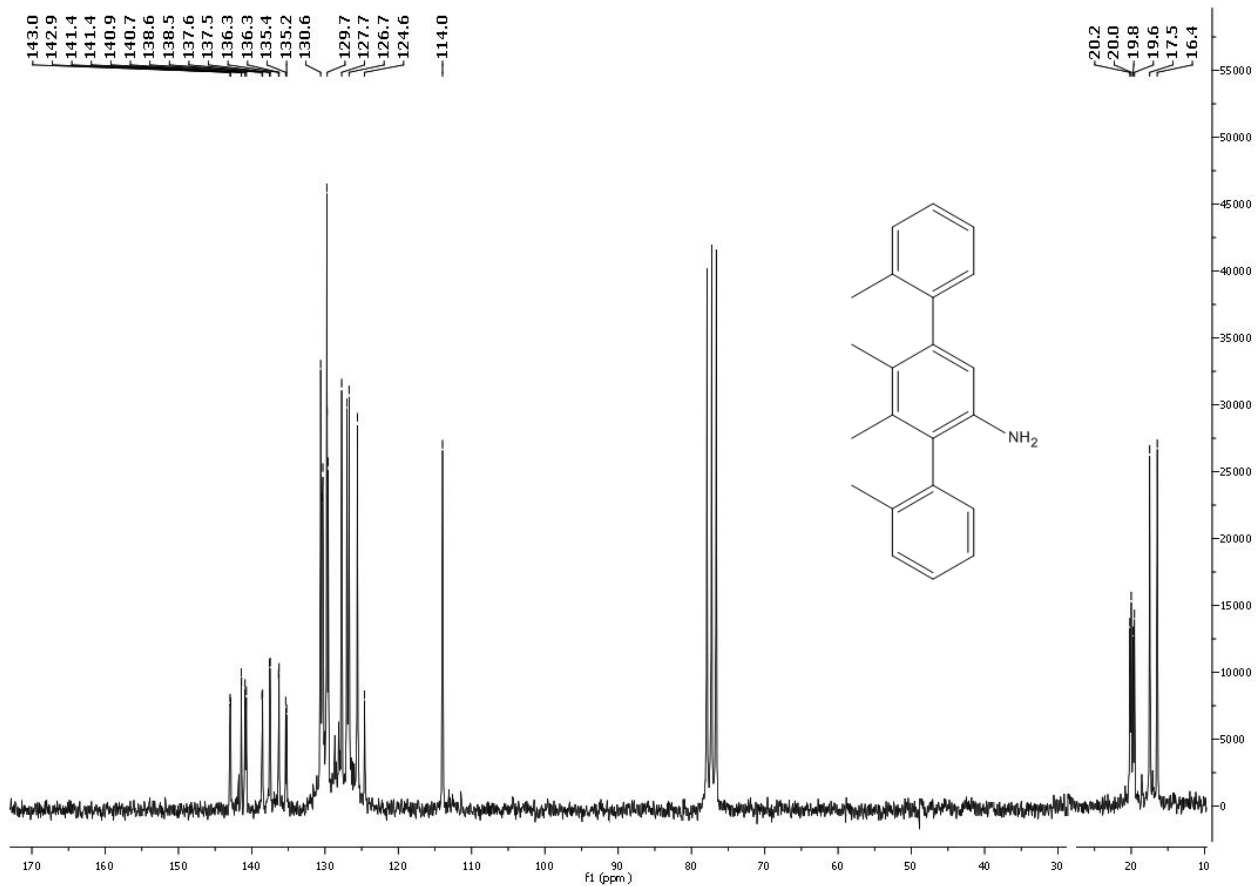



### Expansion between 144-113 ppm

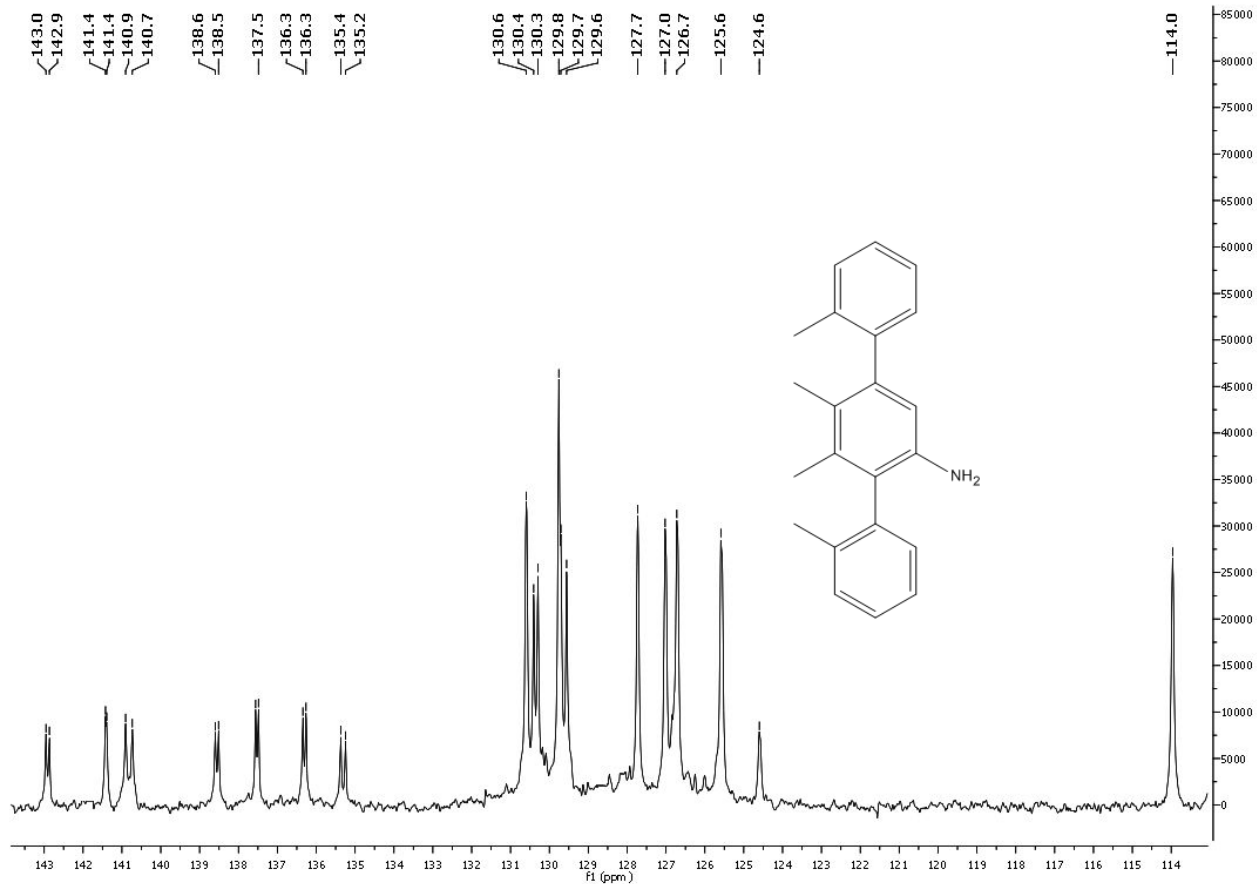

### Expansion between 22-15 ppm

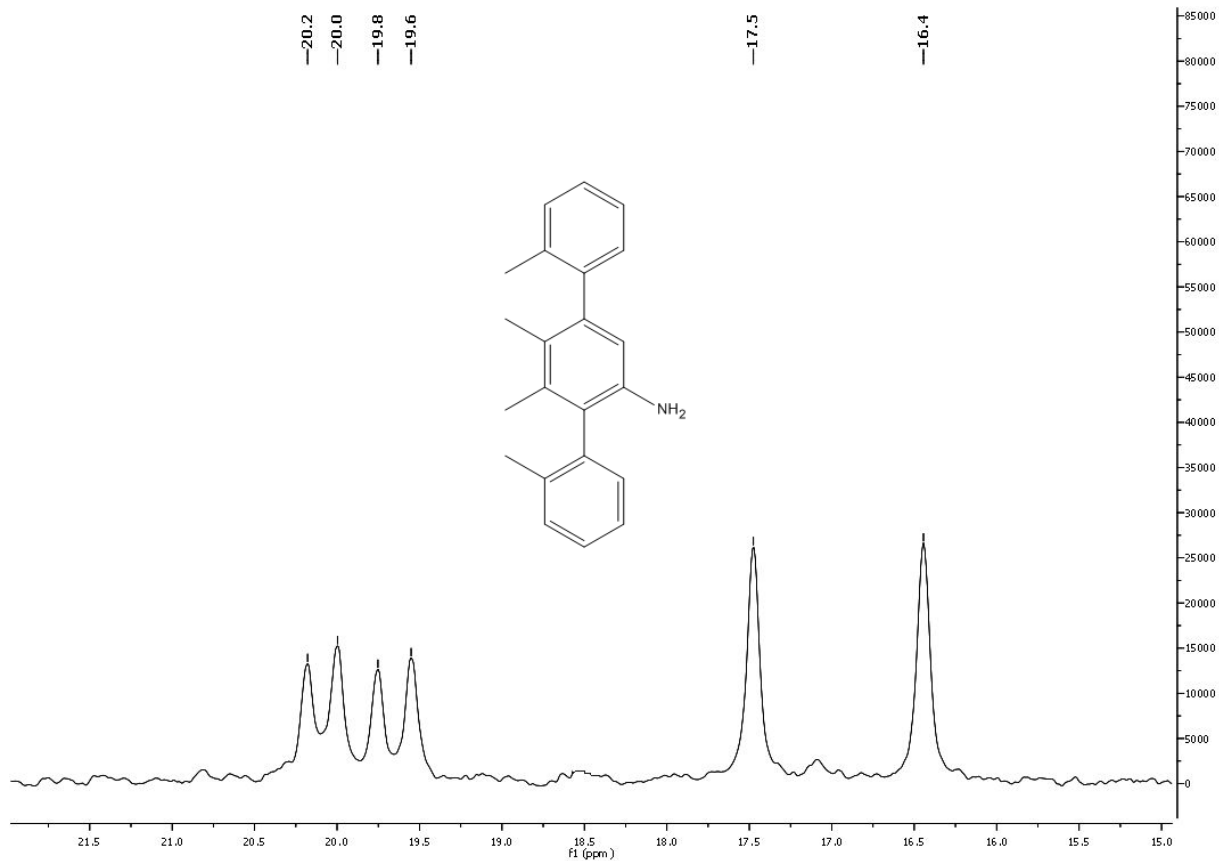

### 11.14 4,7-Diiodo-5,6-dimethylsatin (10b)

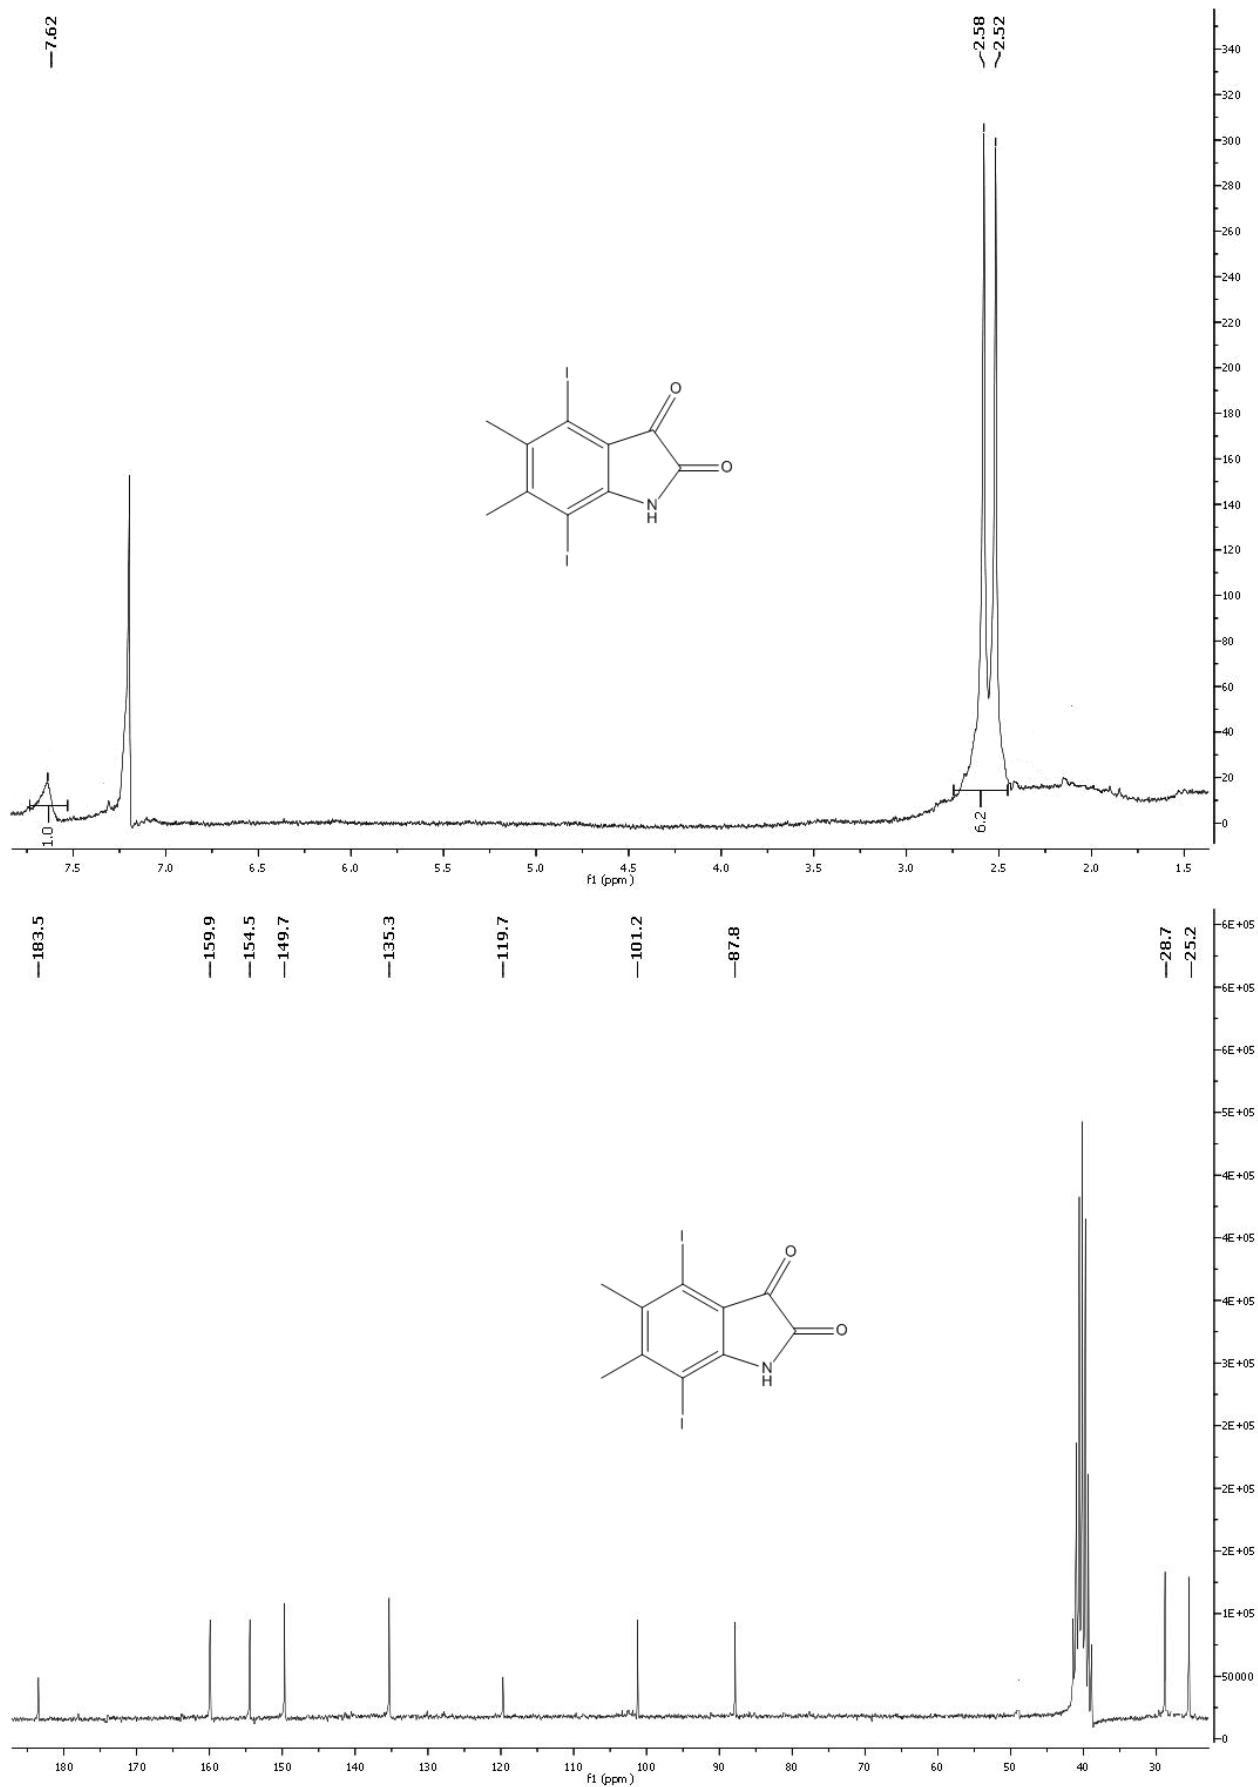

### 11.15 5,6-Dimethyl-4,7-bis(*o*-tolyl)isatin (11b)

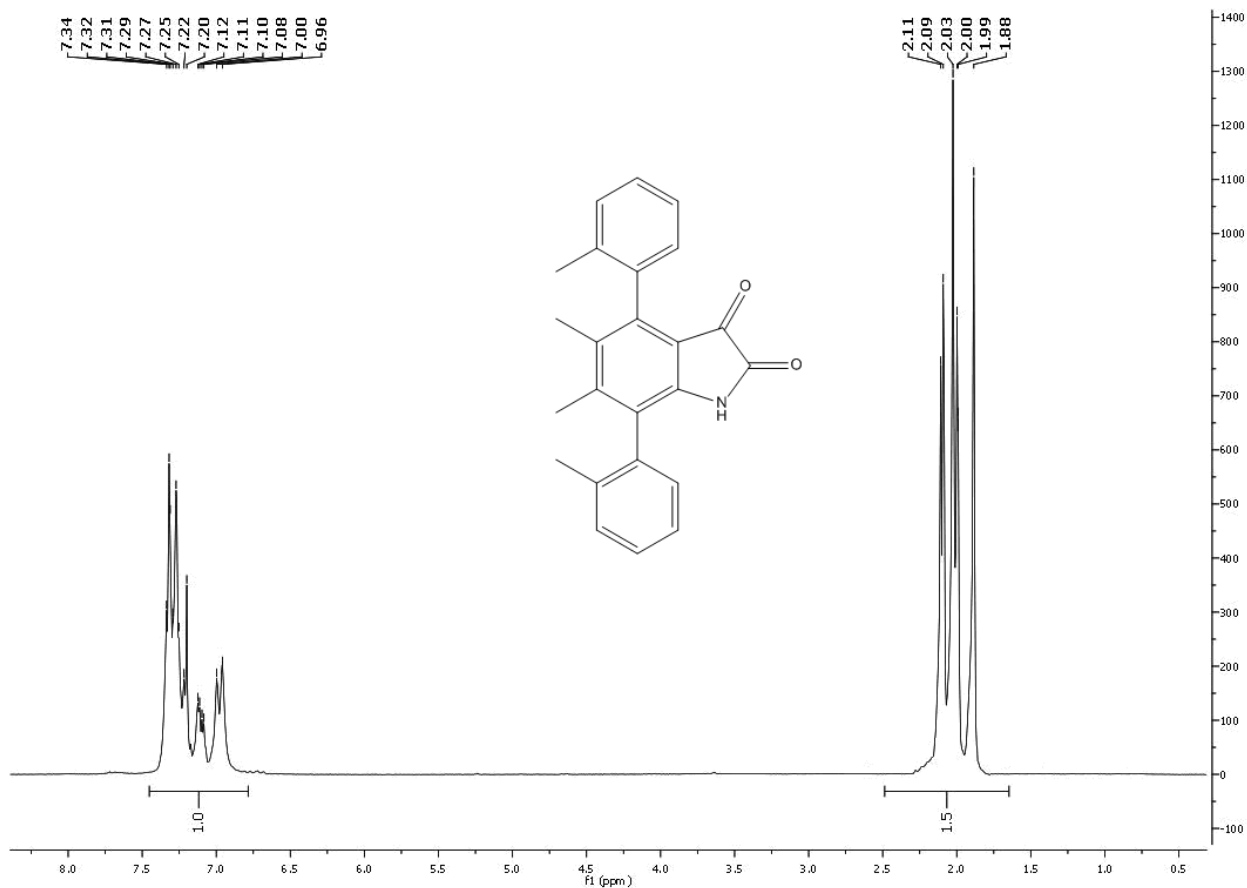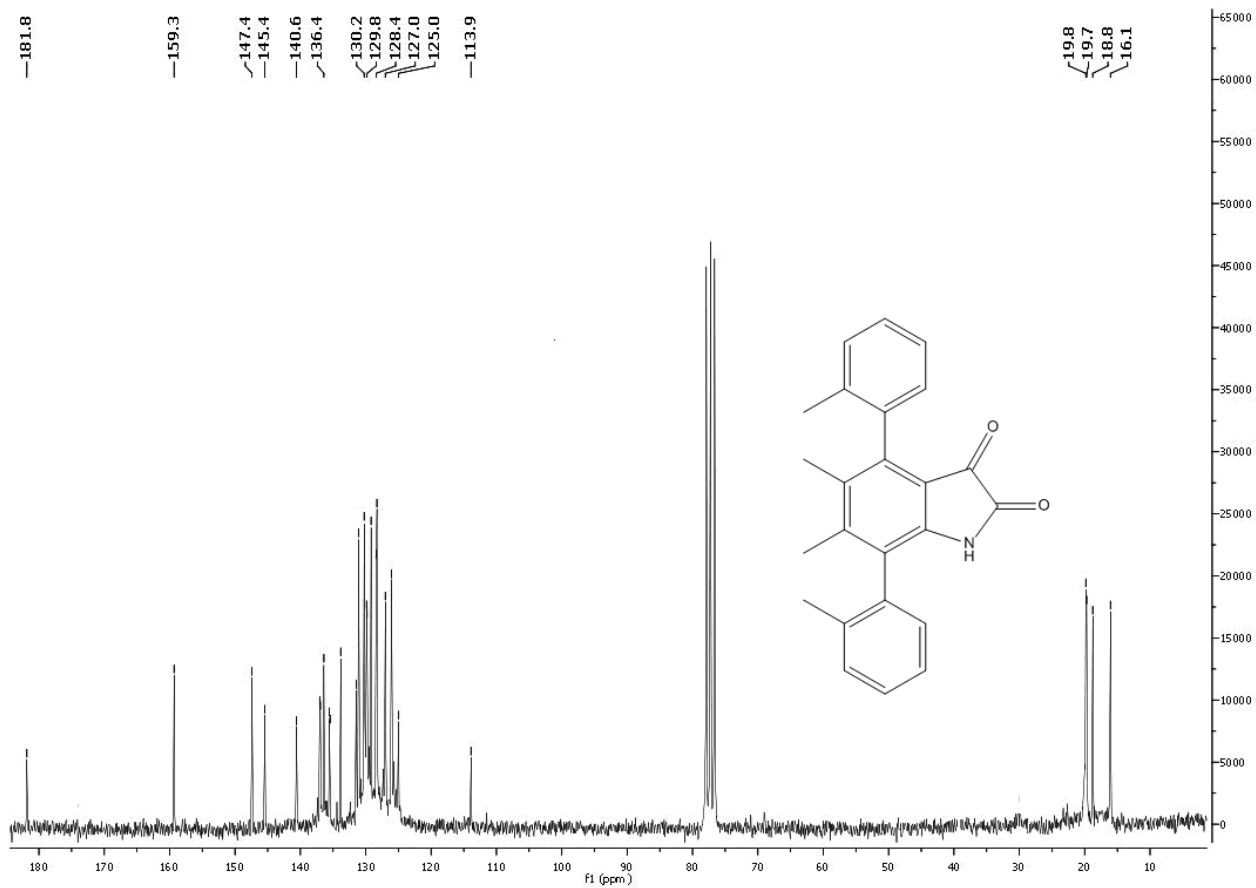

### Expansion between 147-123 ppm

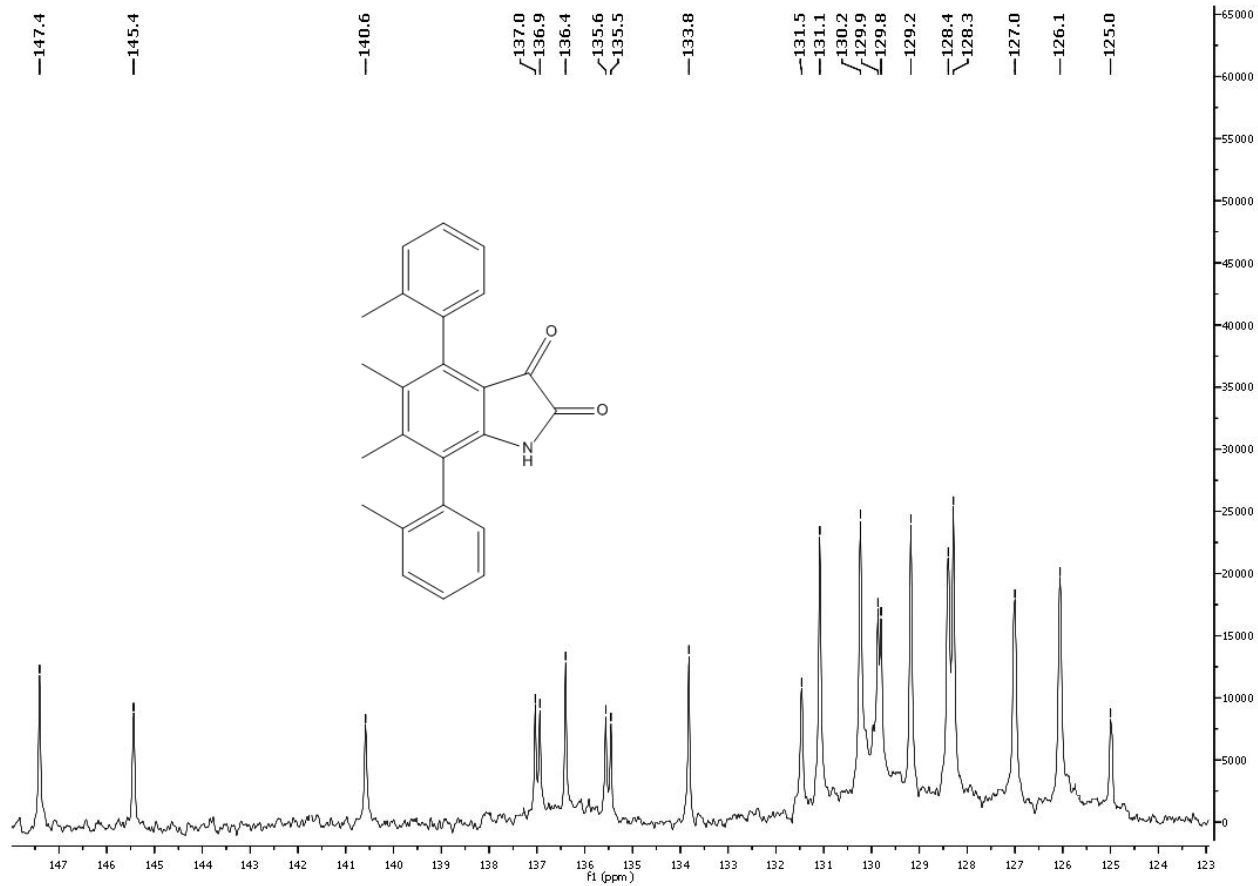

### Expansion between 21-13 ppm

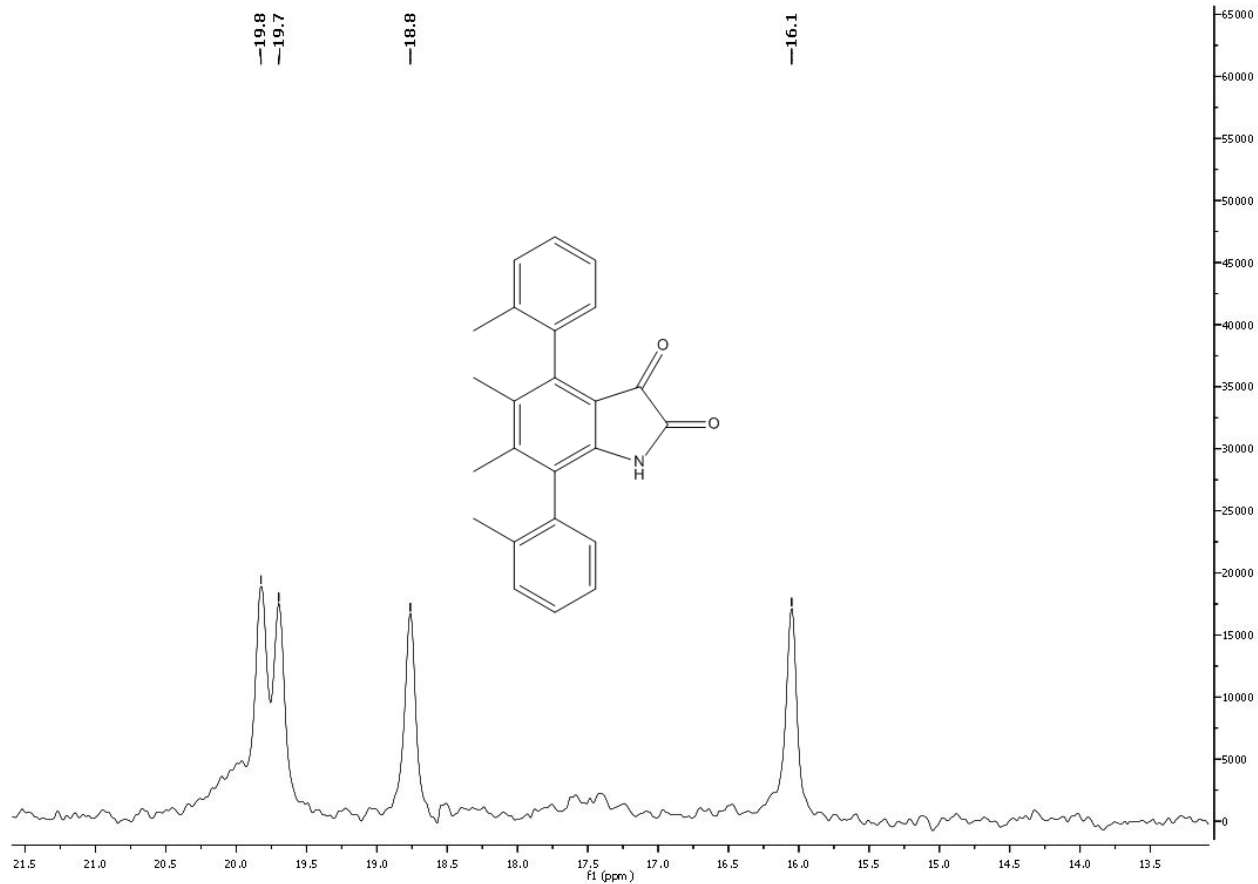

### 11.16 2-Amino-4,5-dimethyl-3,6-bis(*o*-tolyl)benzoic acid (12b)

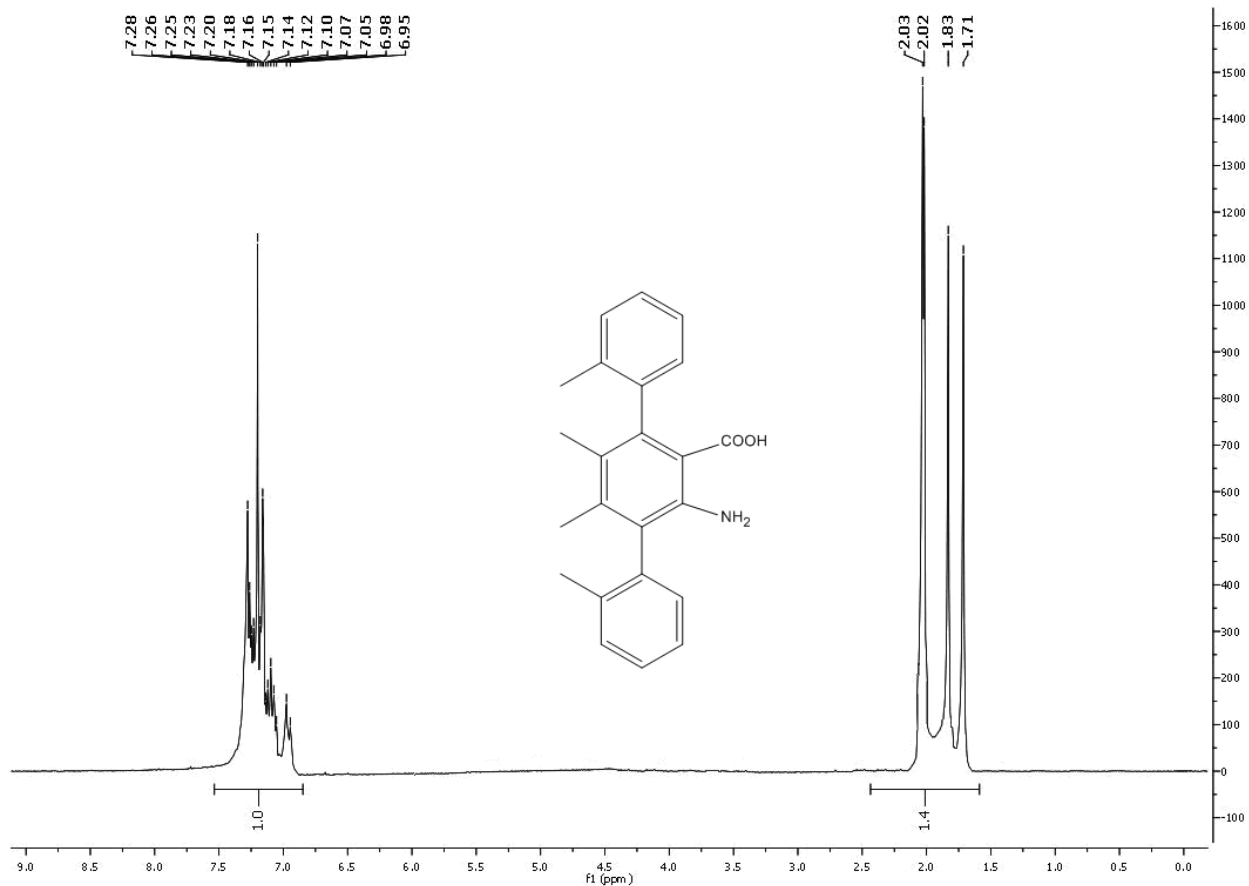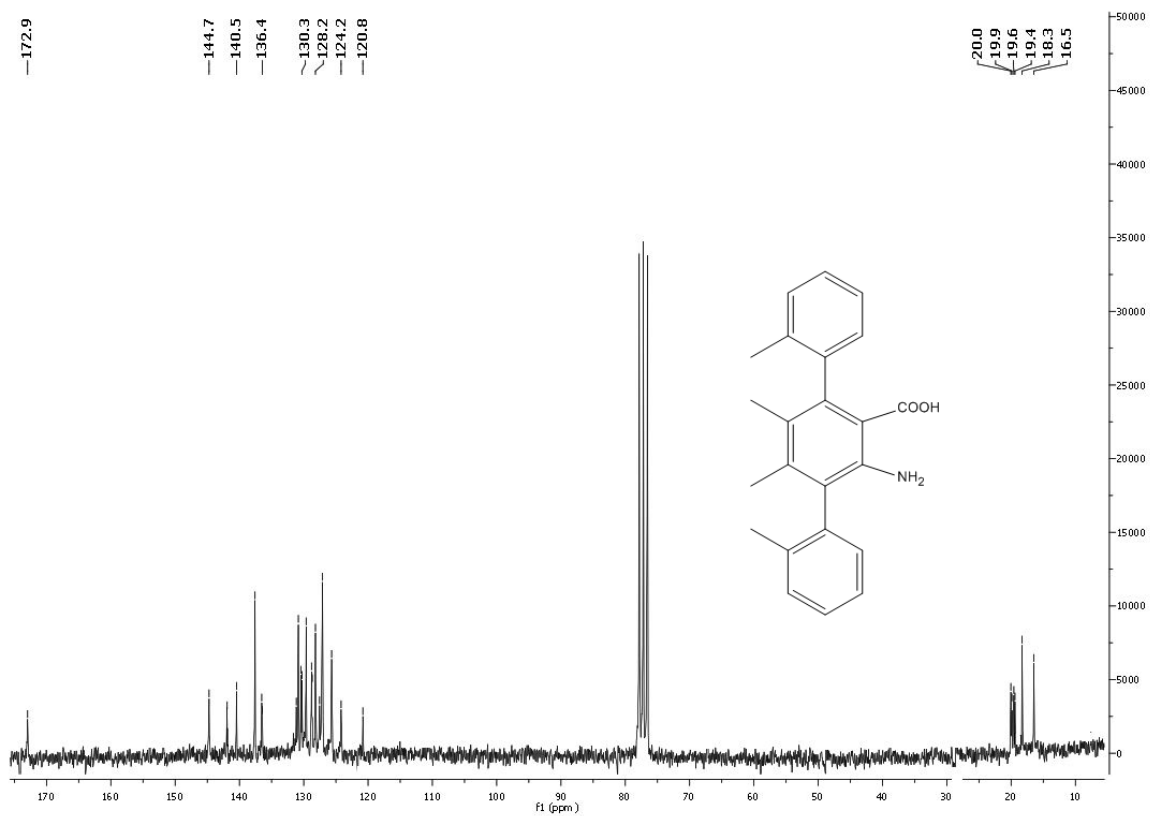

### Expansion between 145-120 ppm

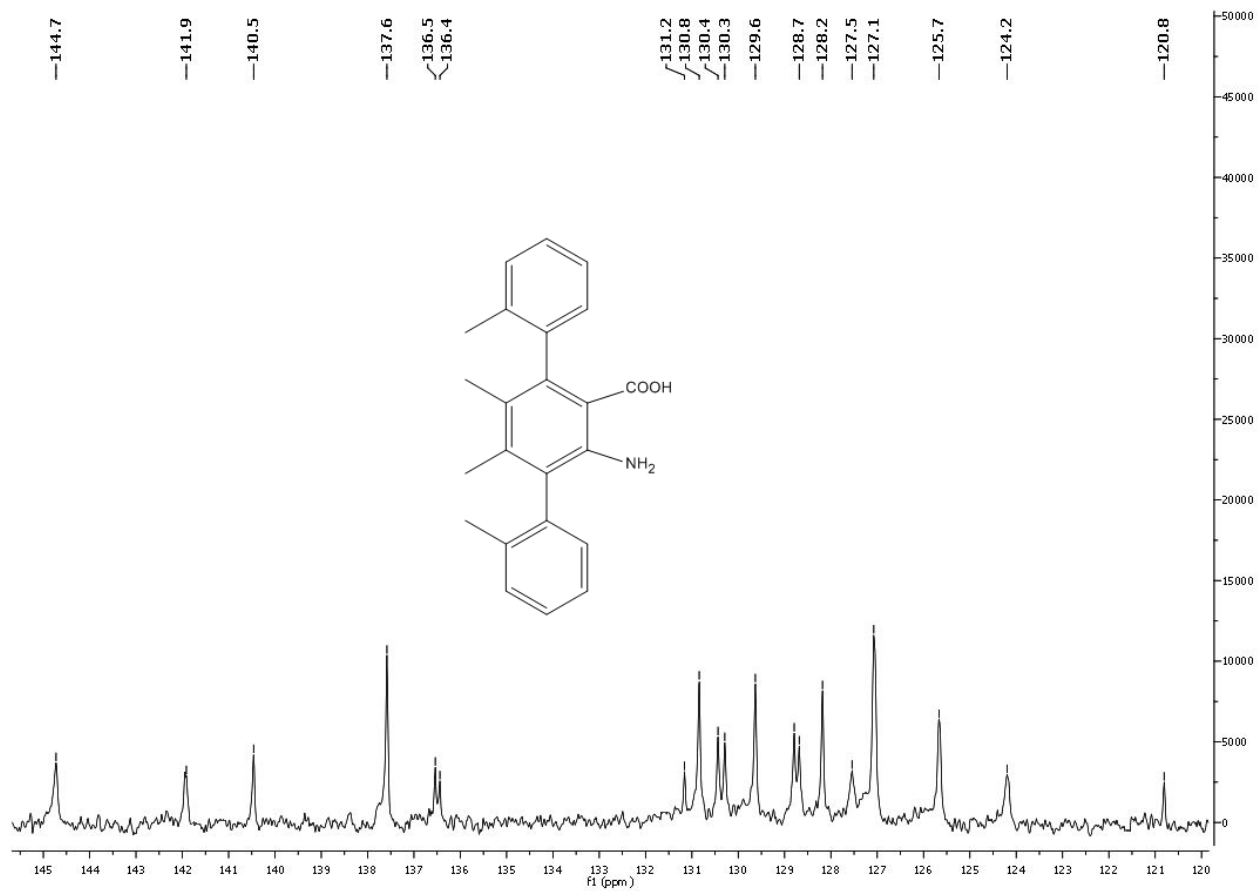

### Expansion between 22-15 ppm

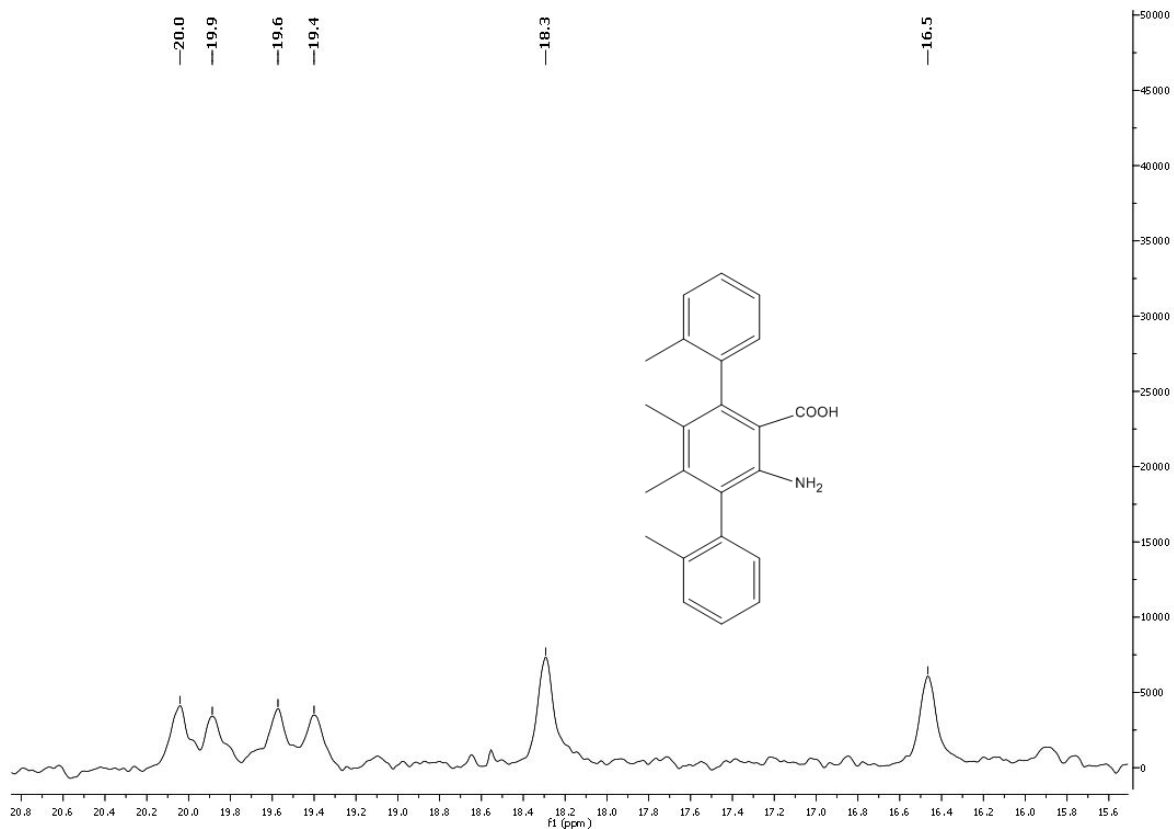

11.17 5,6-Dimethyl-2-(3-methylbutoxy)- 4,7-bis(*o*-tolyl)-1,3-benzodithiole (13b)

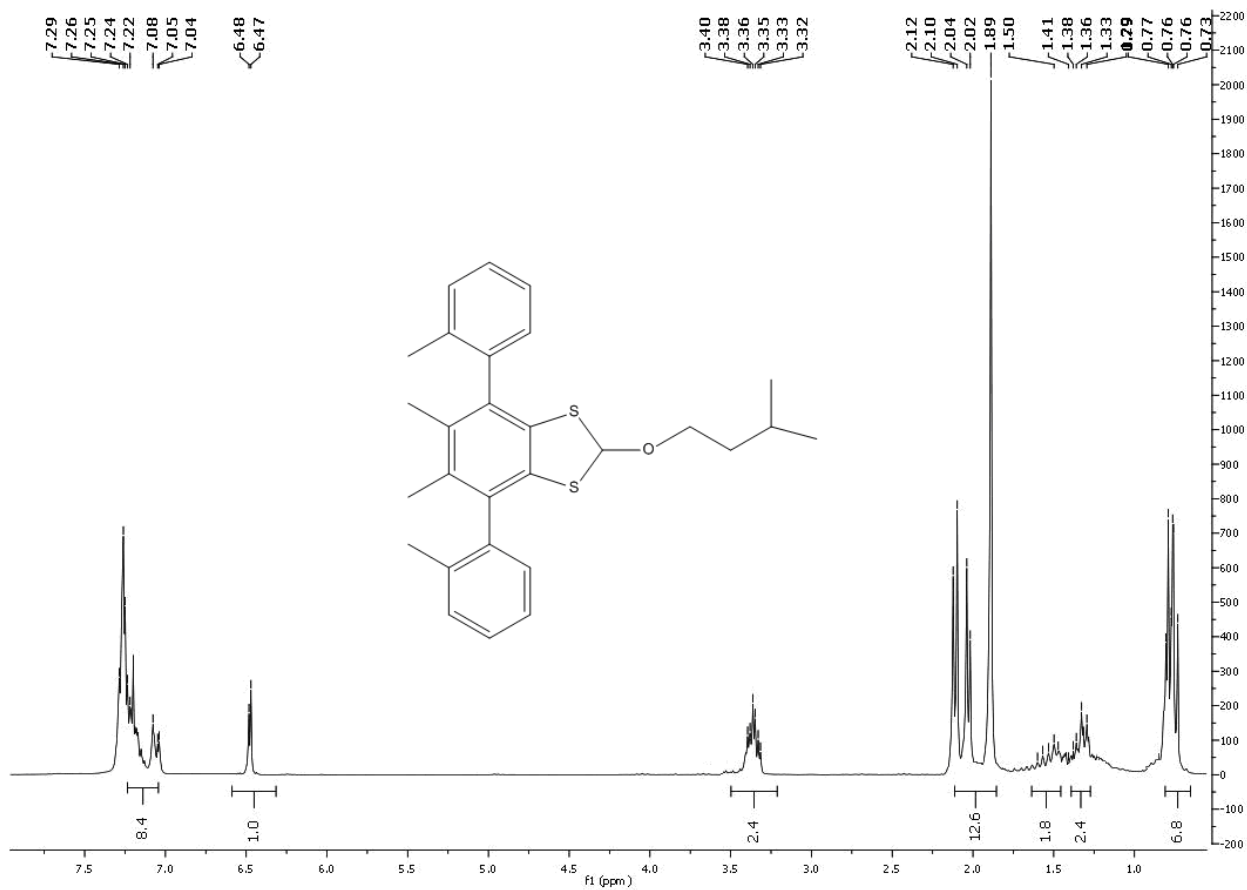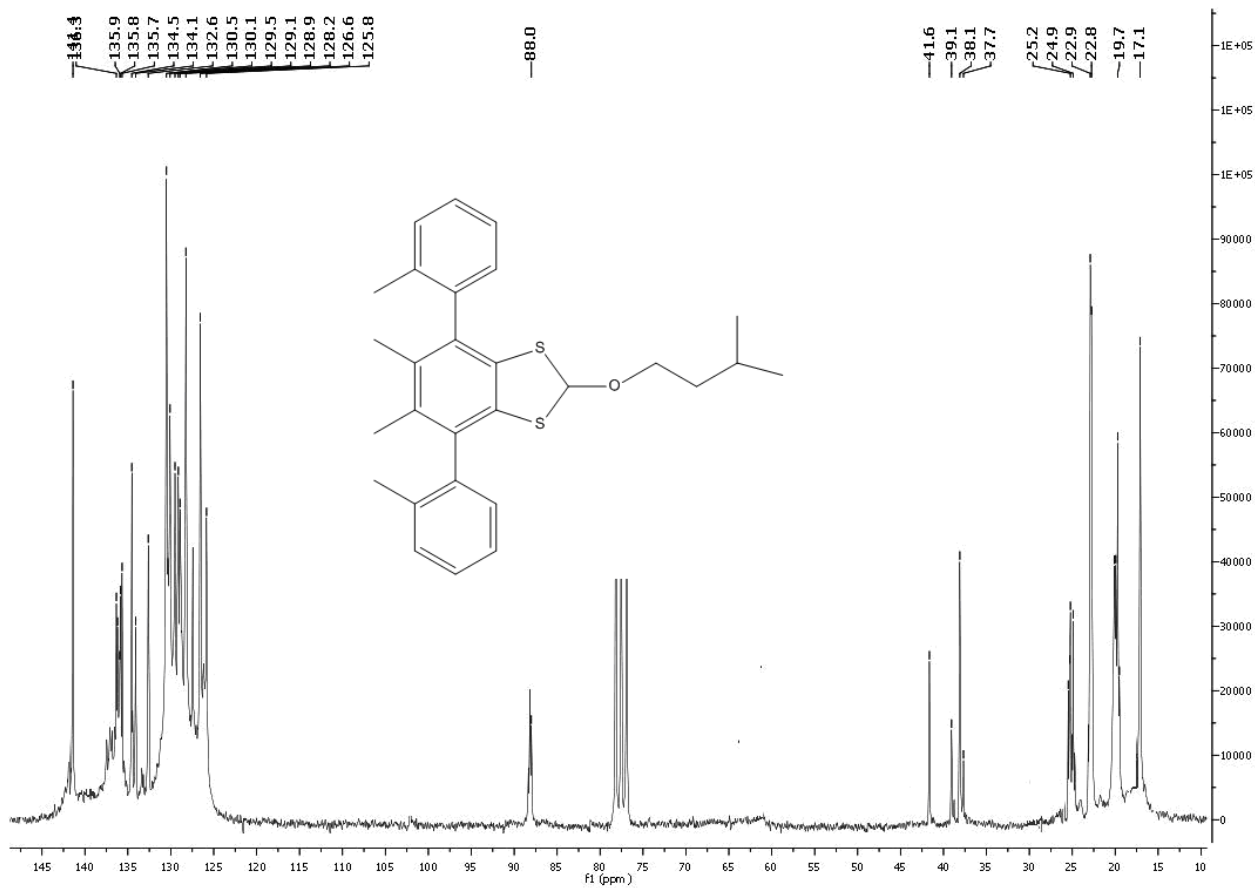

### Expansion between 142-125 ppm

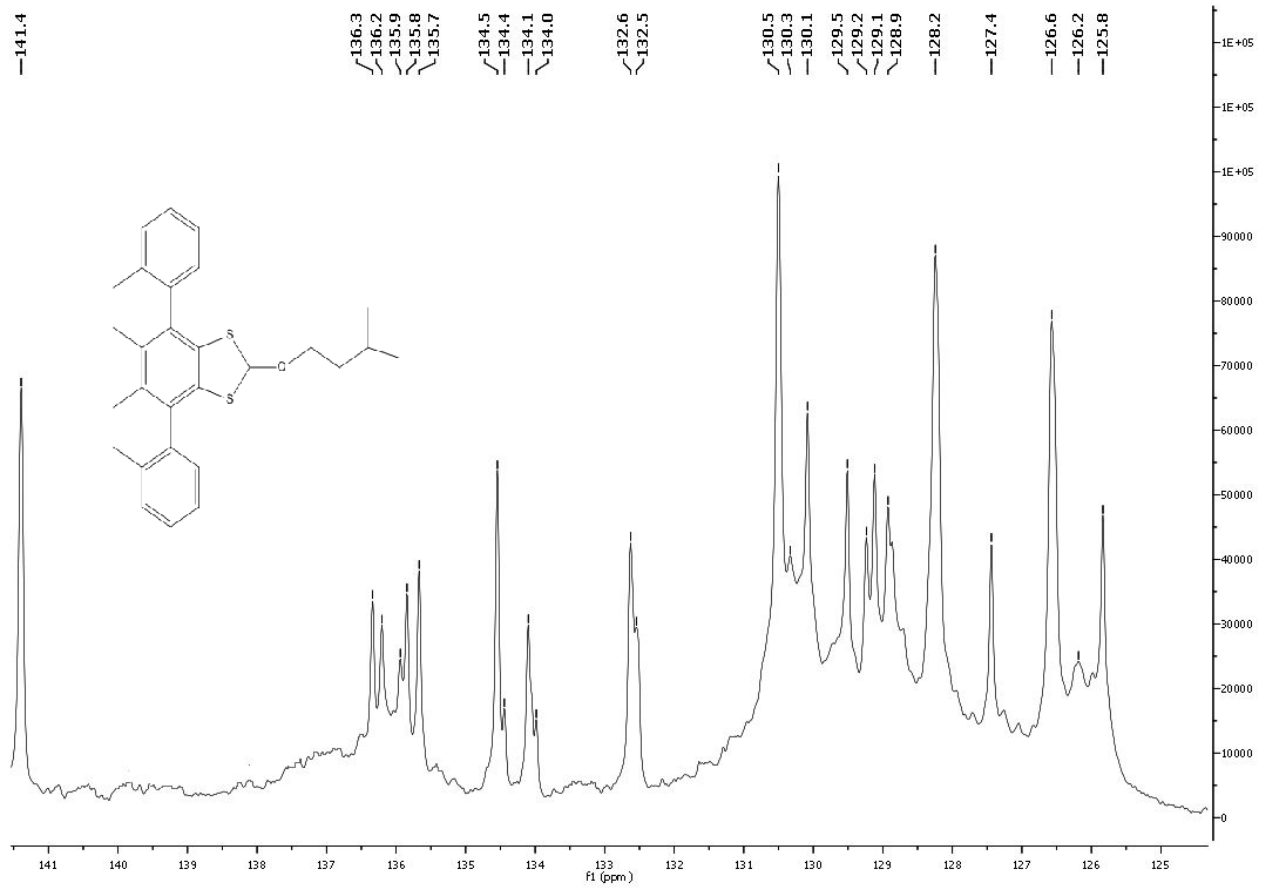

### Expansion between 90-85 ppm

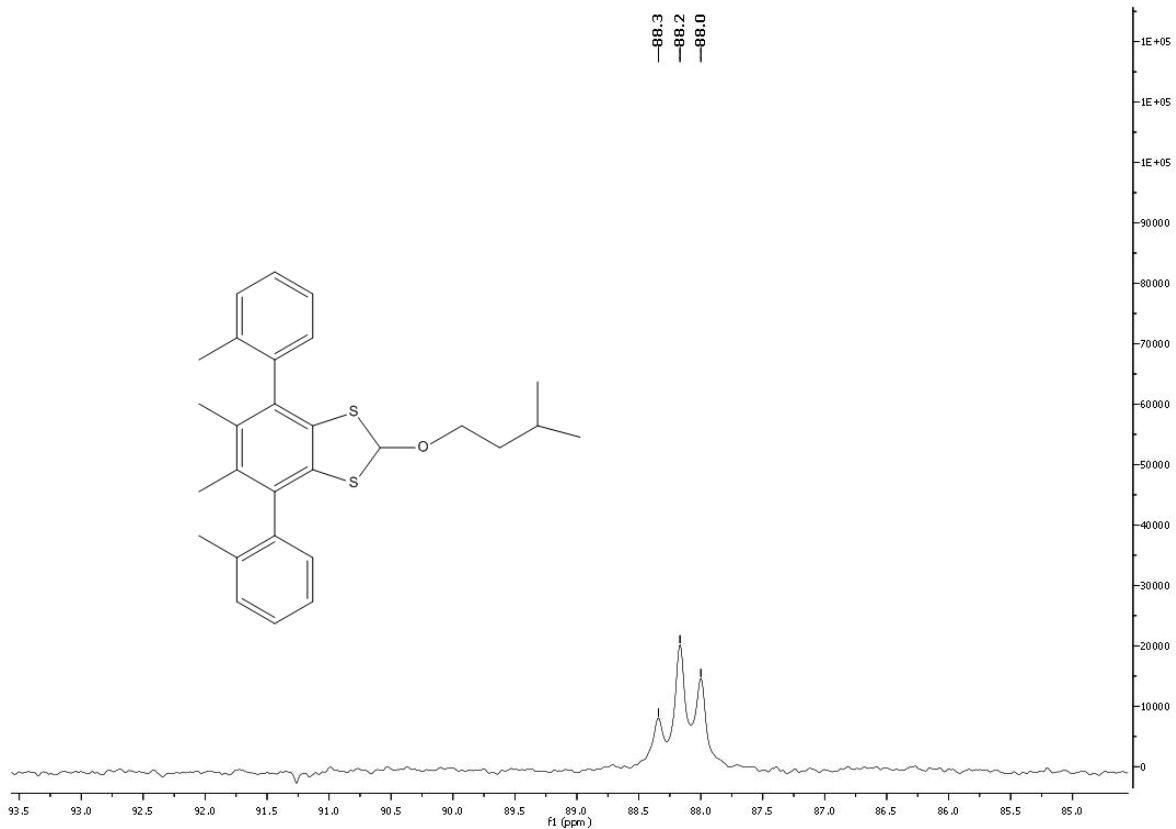



# Expansion between 43-14 ppm

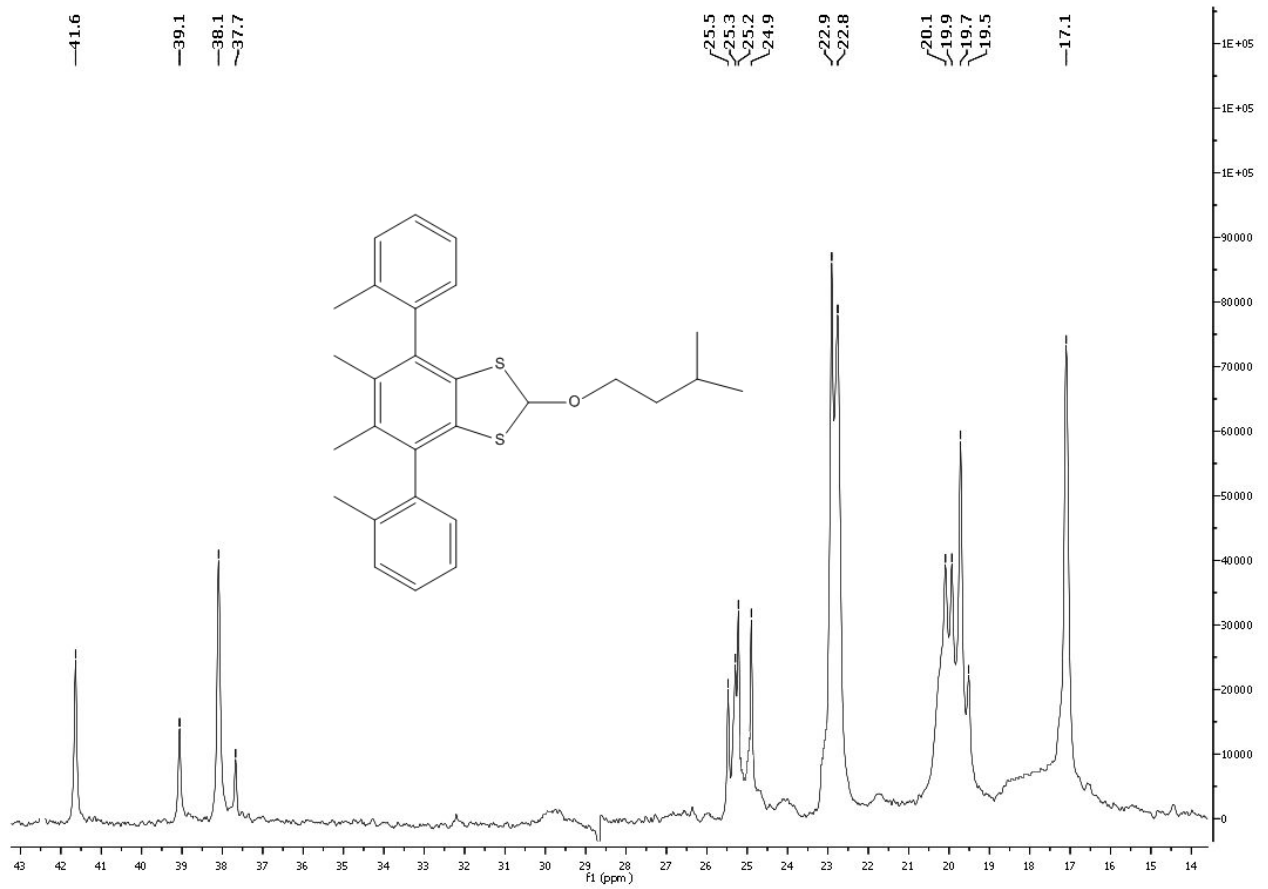



# Expansion between 148-123 ppm

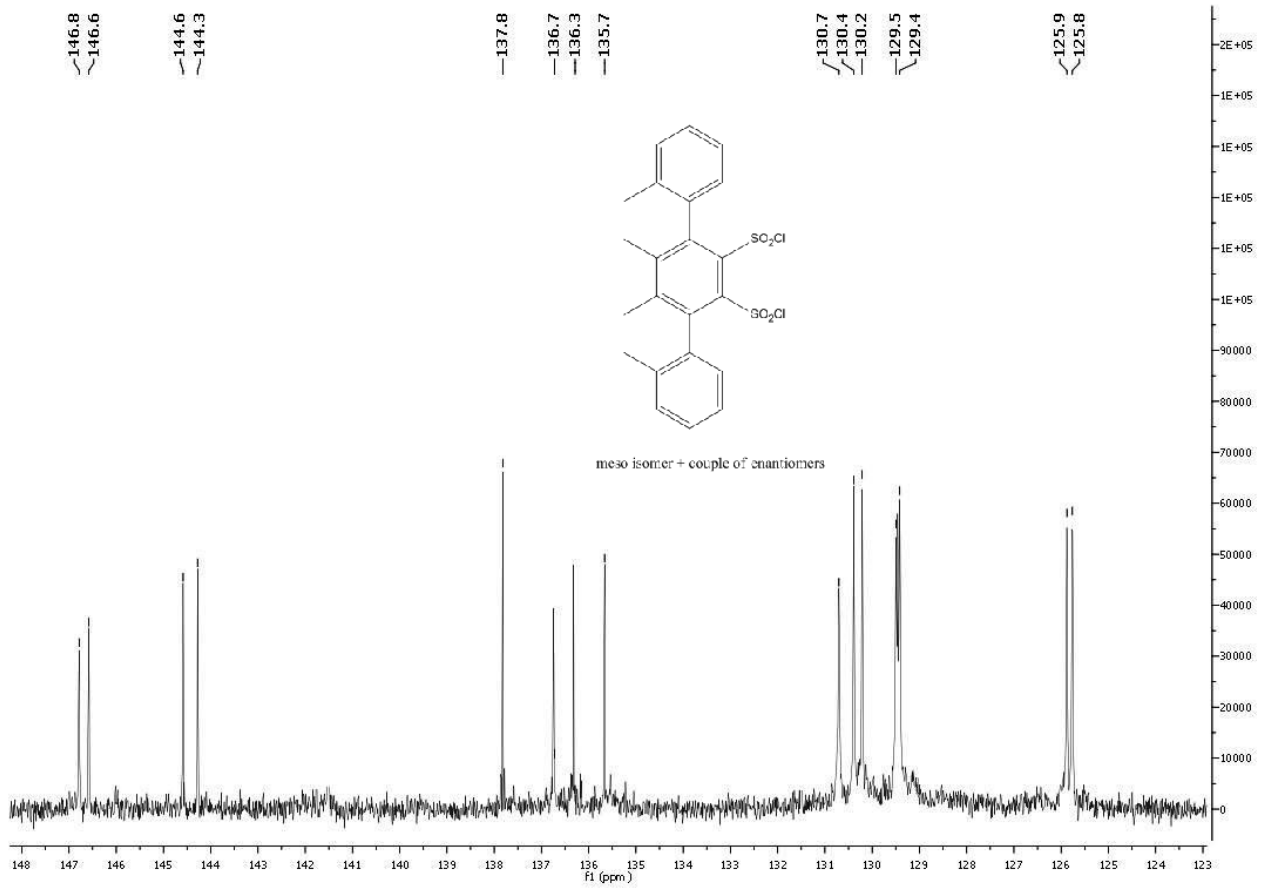

### 11.19 *meso* 4,5-Dimethyl-3,6-bis(*o*-tolyl)-1,2-benzenedisulfonyl chloride (14b)

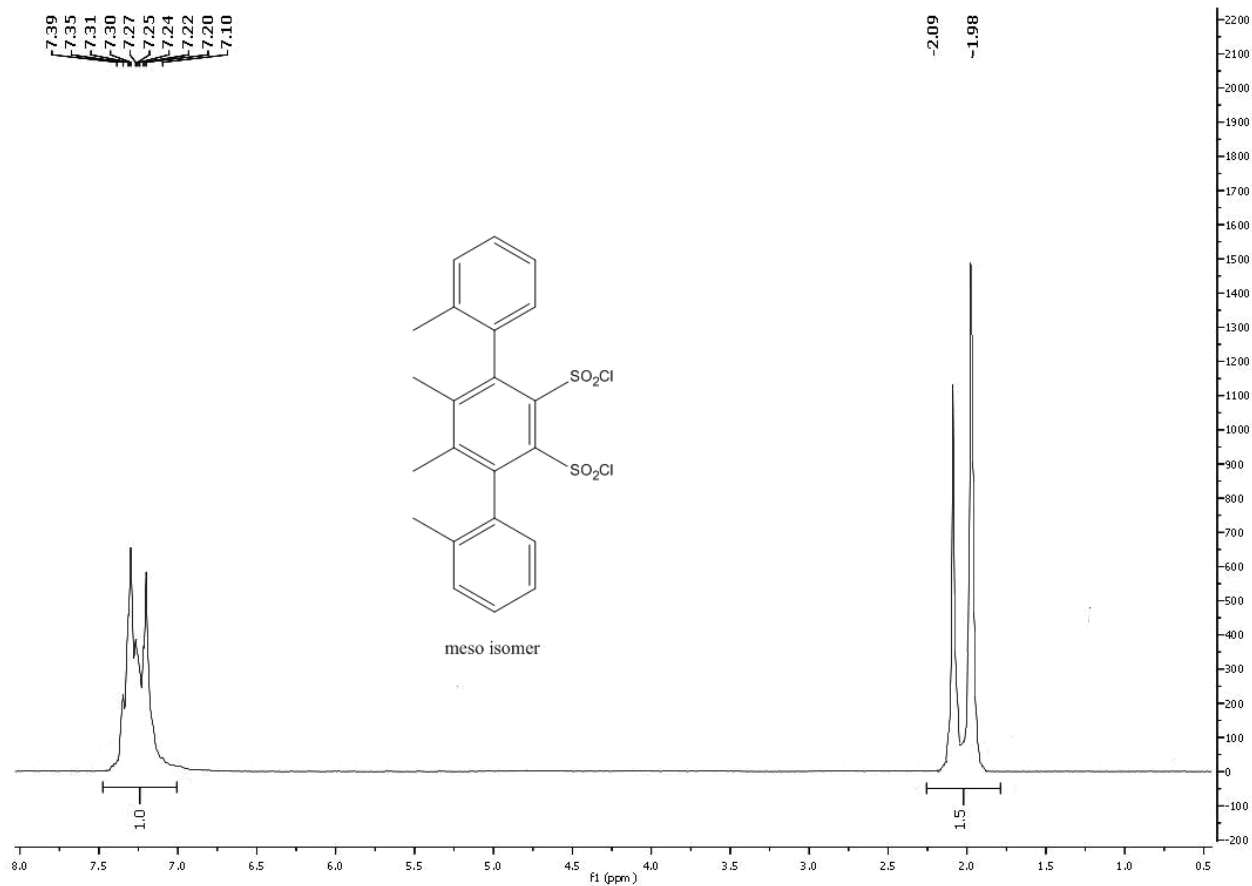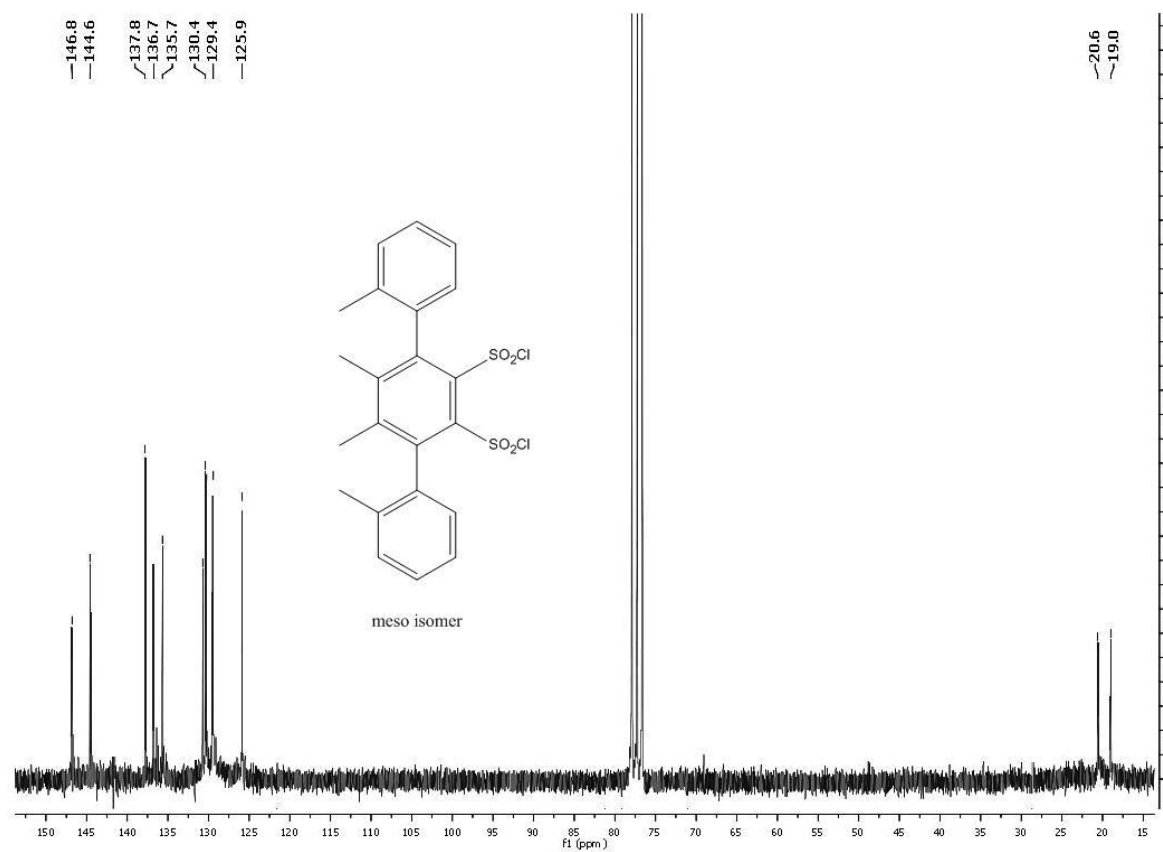

# Expansion between 147-121 ppm

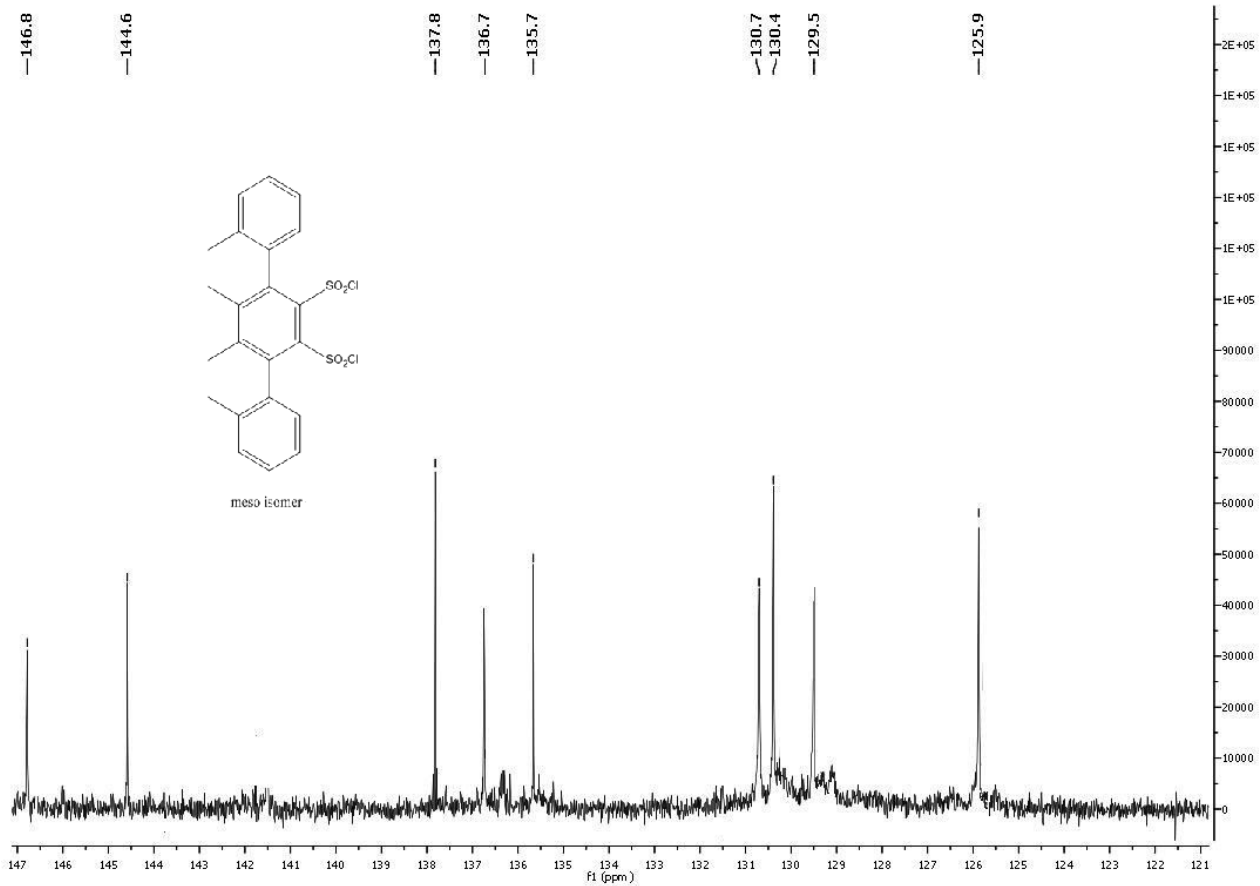

11.20 (-) 4,5-Dimethyl-3,6-(bis-2-tolyl)-1,2-benzenedisulfonyl chloride (14b)

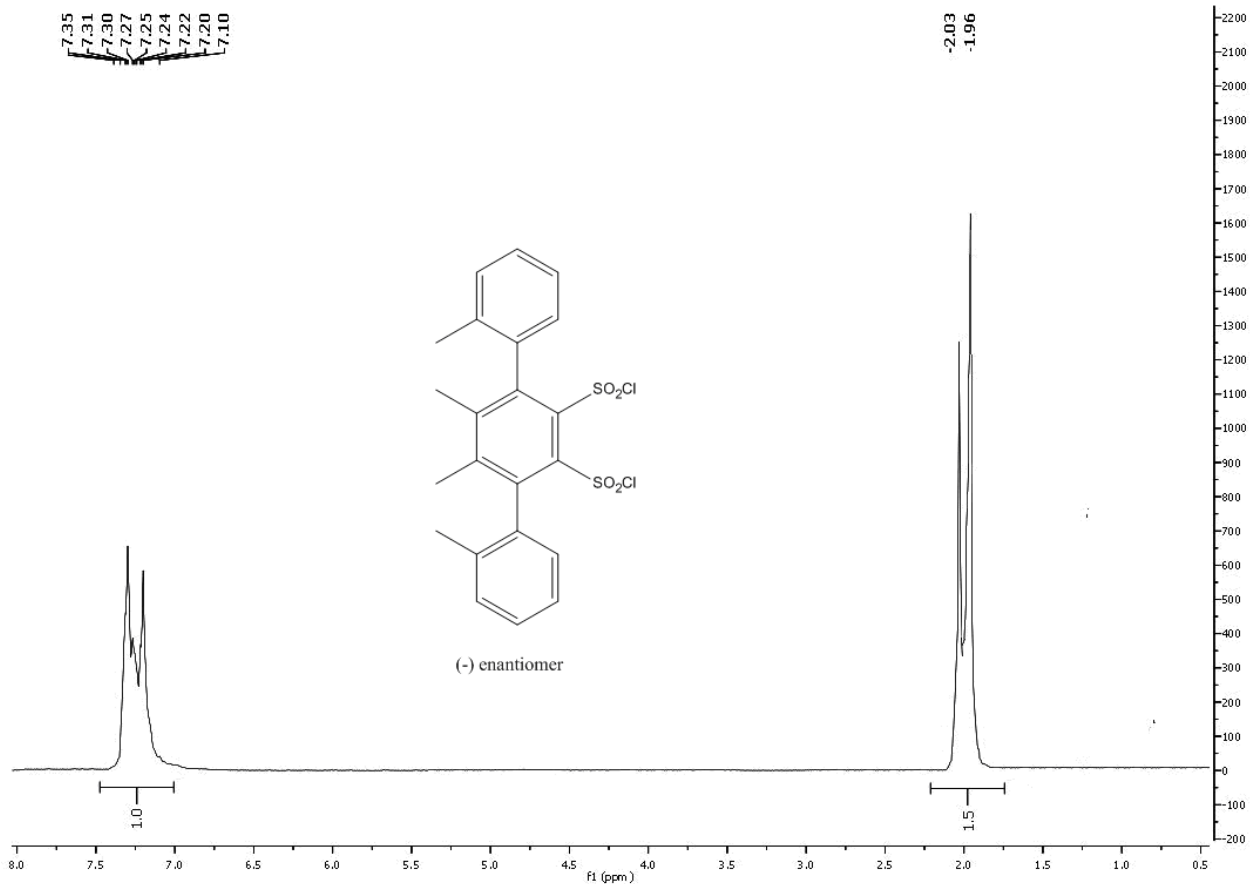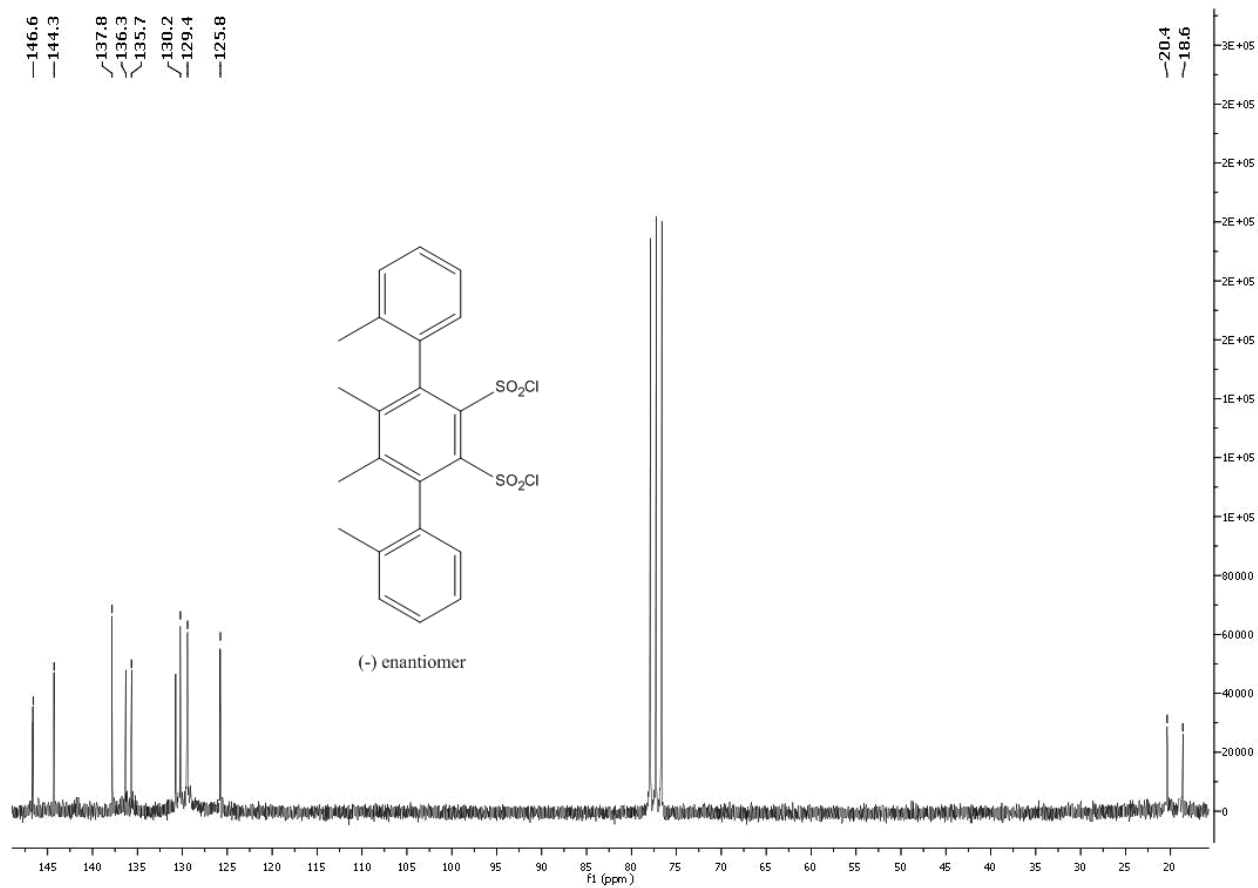

# Expansion between 147-124 ppm

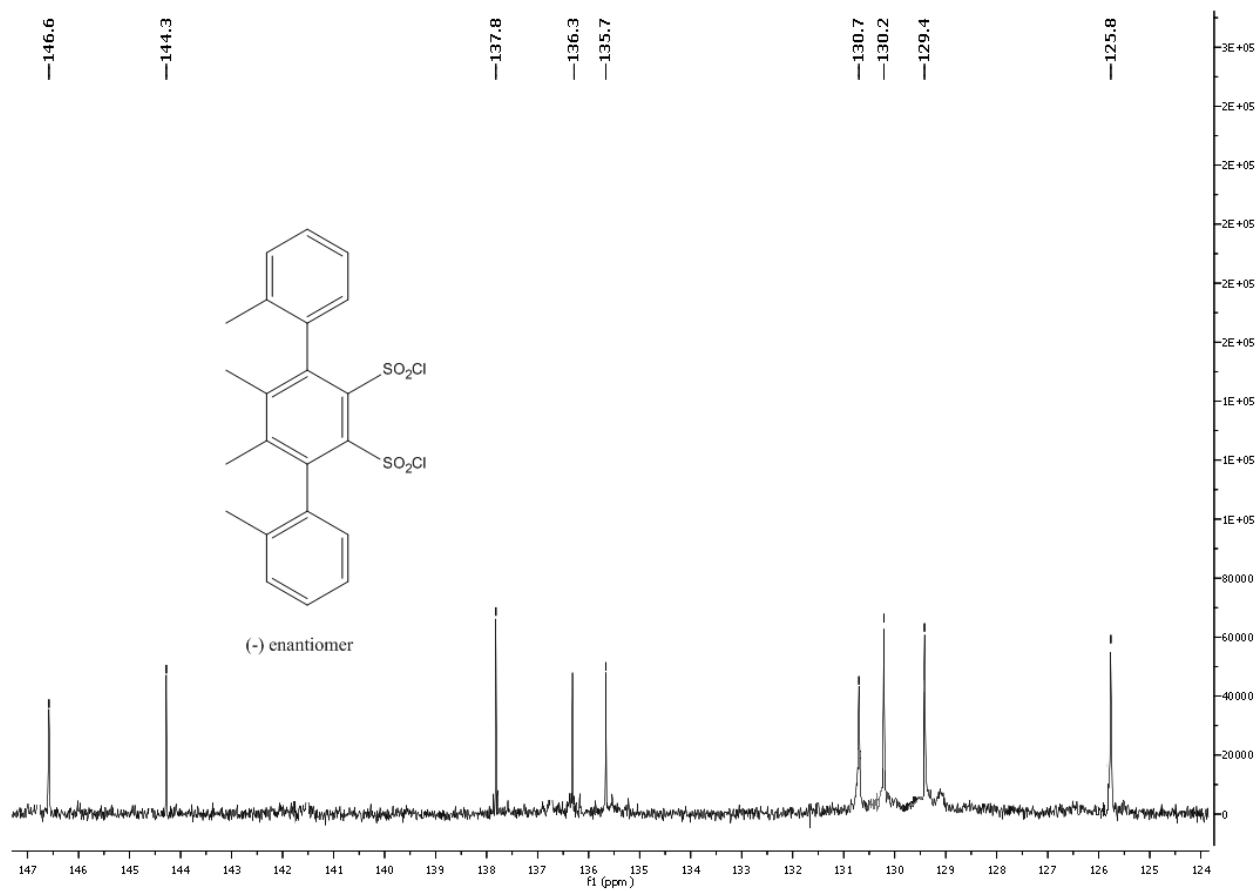

**11.21 4,5-Dimethyl-3,6-bis(*o*-tolyl)-1,2-benzenedisulfonimide (mixture of meso form and couple of atropisomers (3b))**

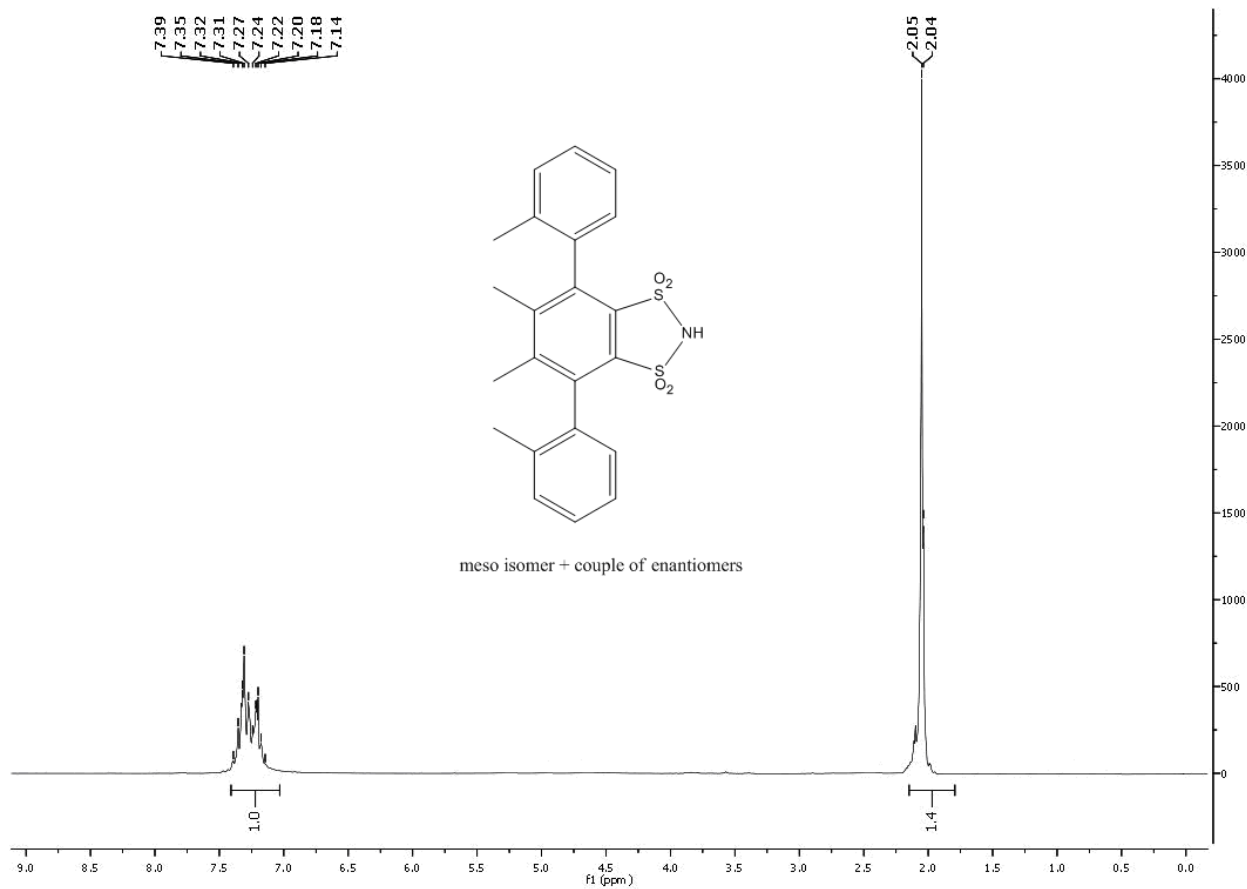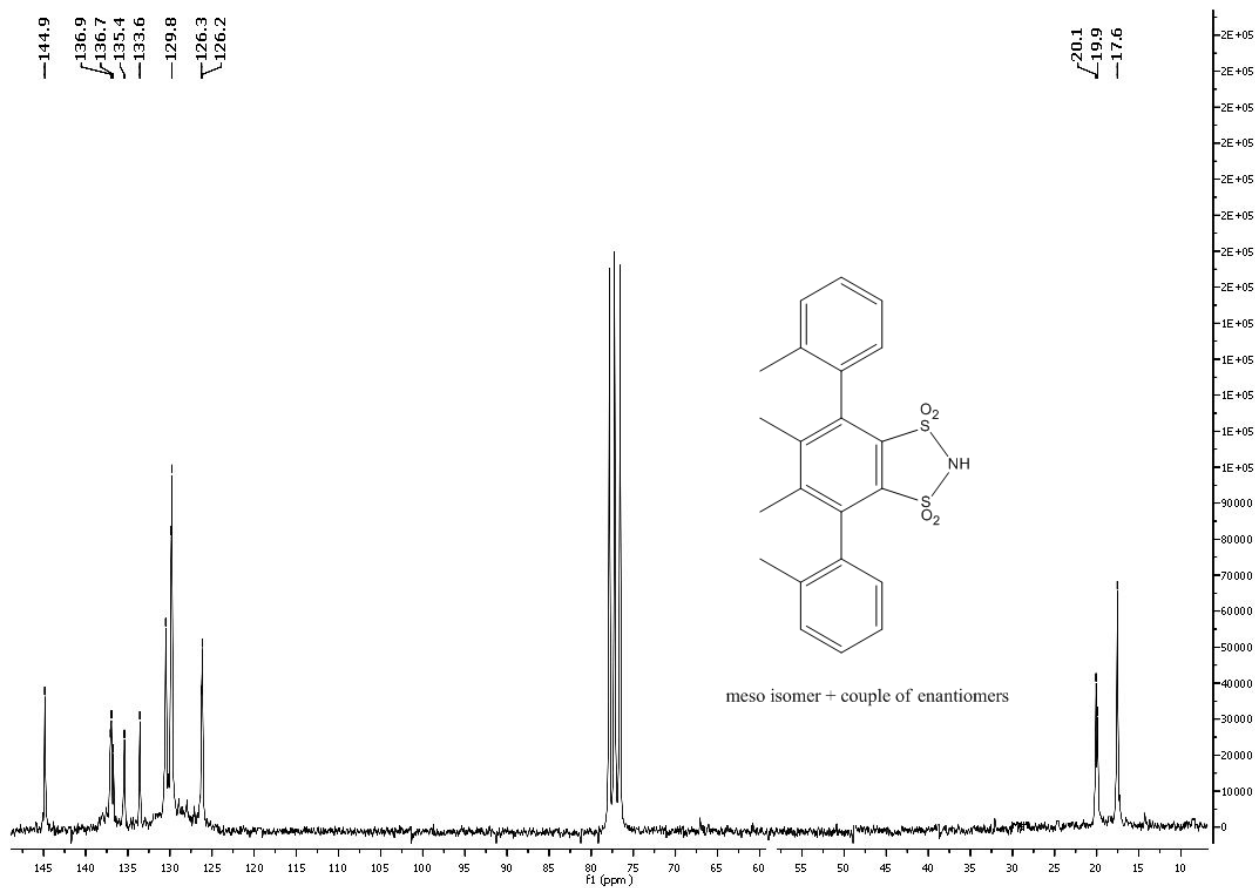



### Expansion between 147-125 ppm

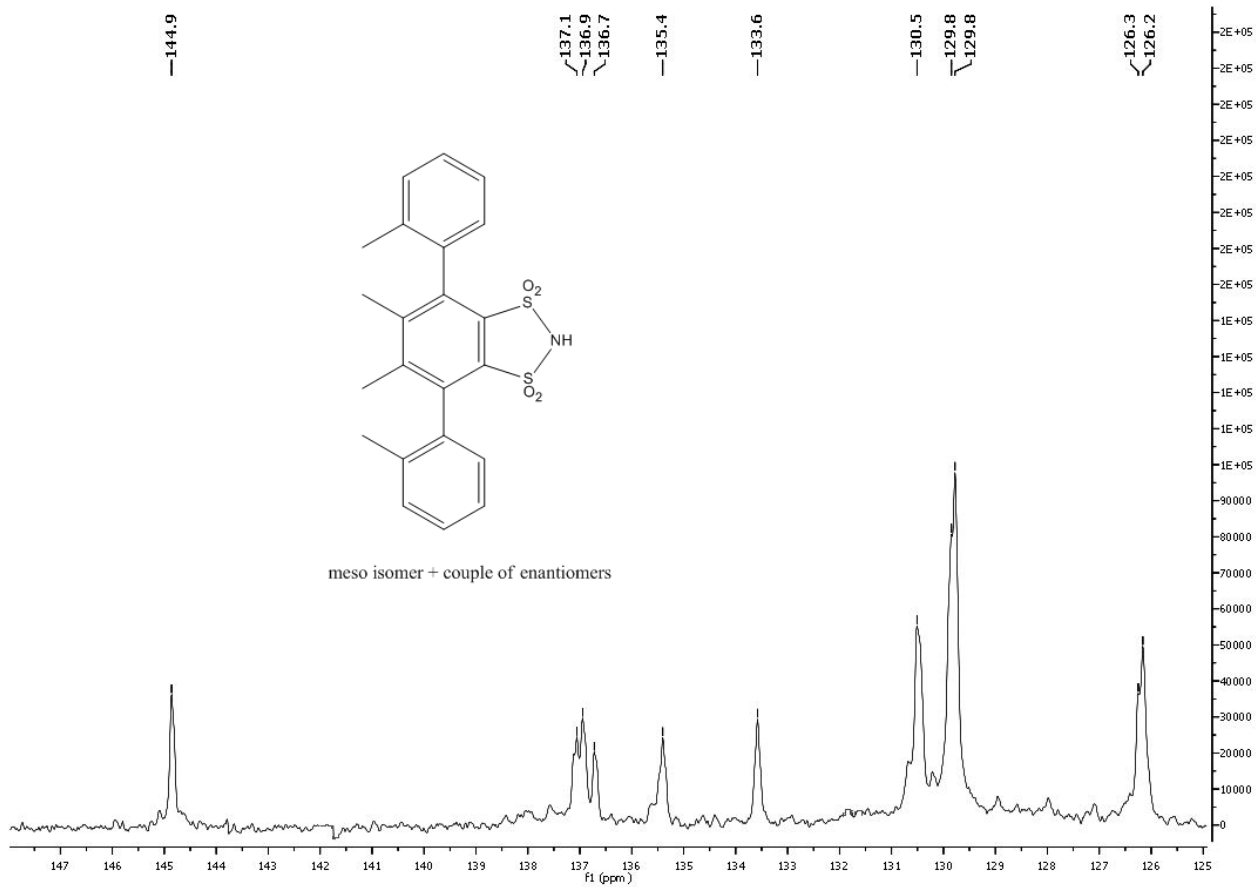

### Expansion between 21-16 ppm

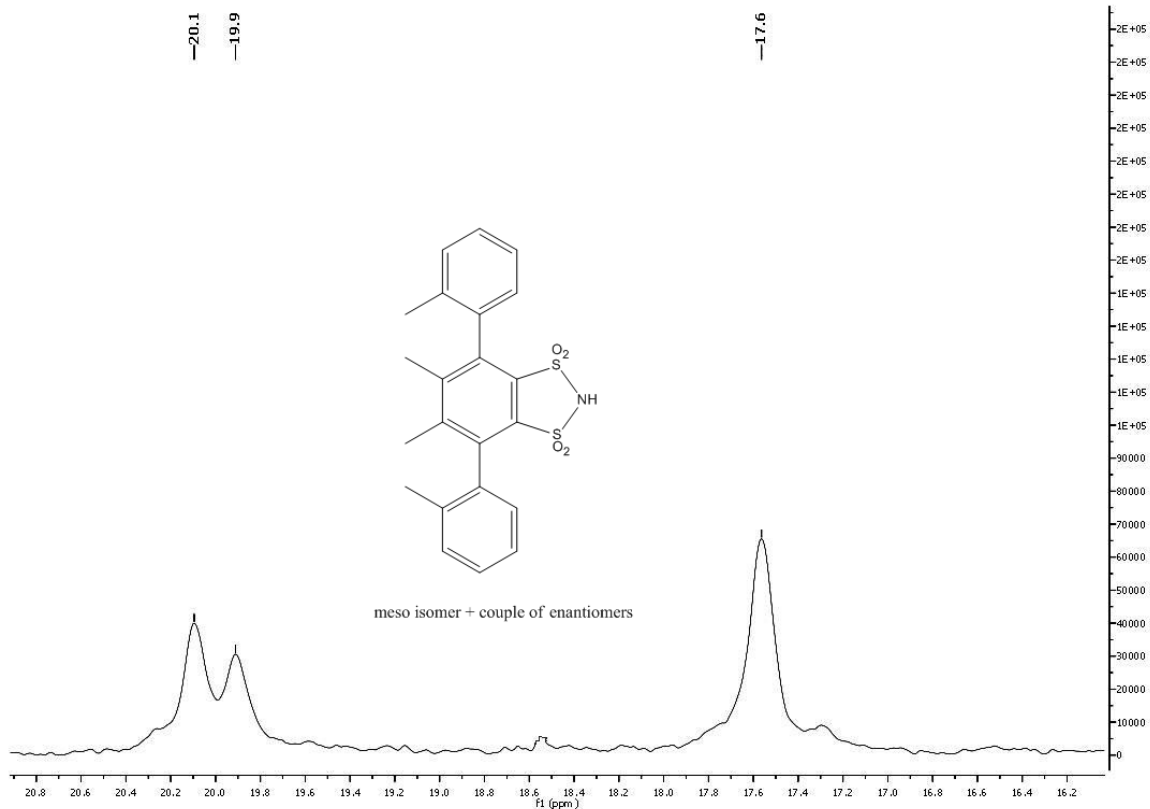

### 11.22 (-) 4,5-Dimethyl-3,6-bis(*o*-tolyl)-1,2-benzenedisulfonimide (3b)

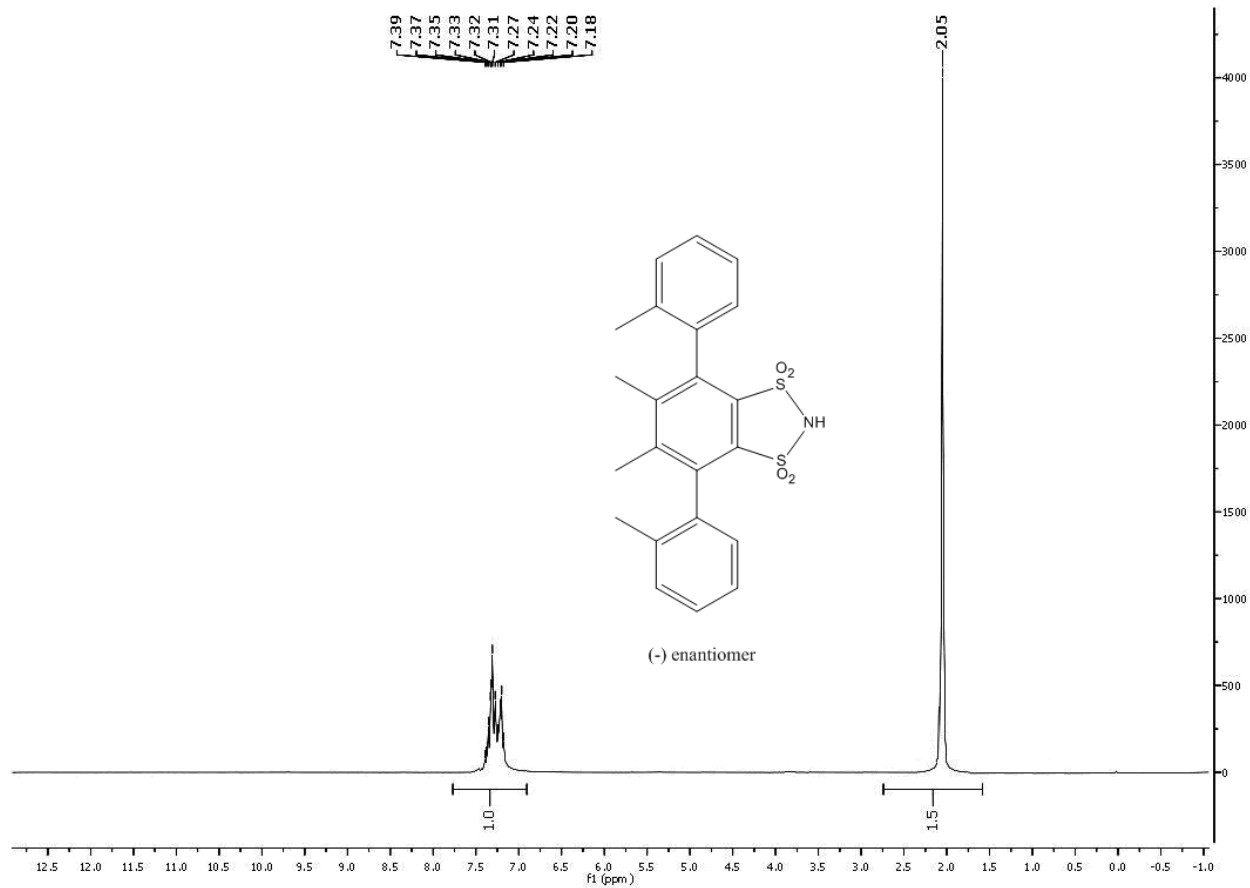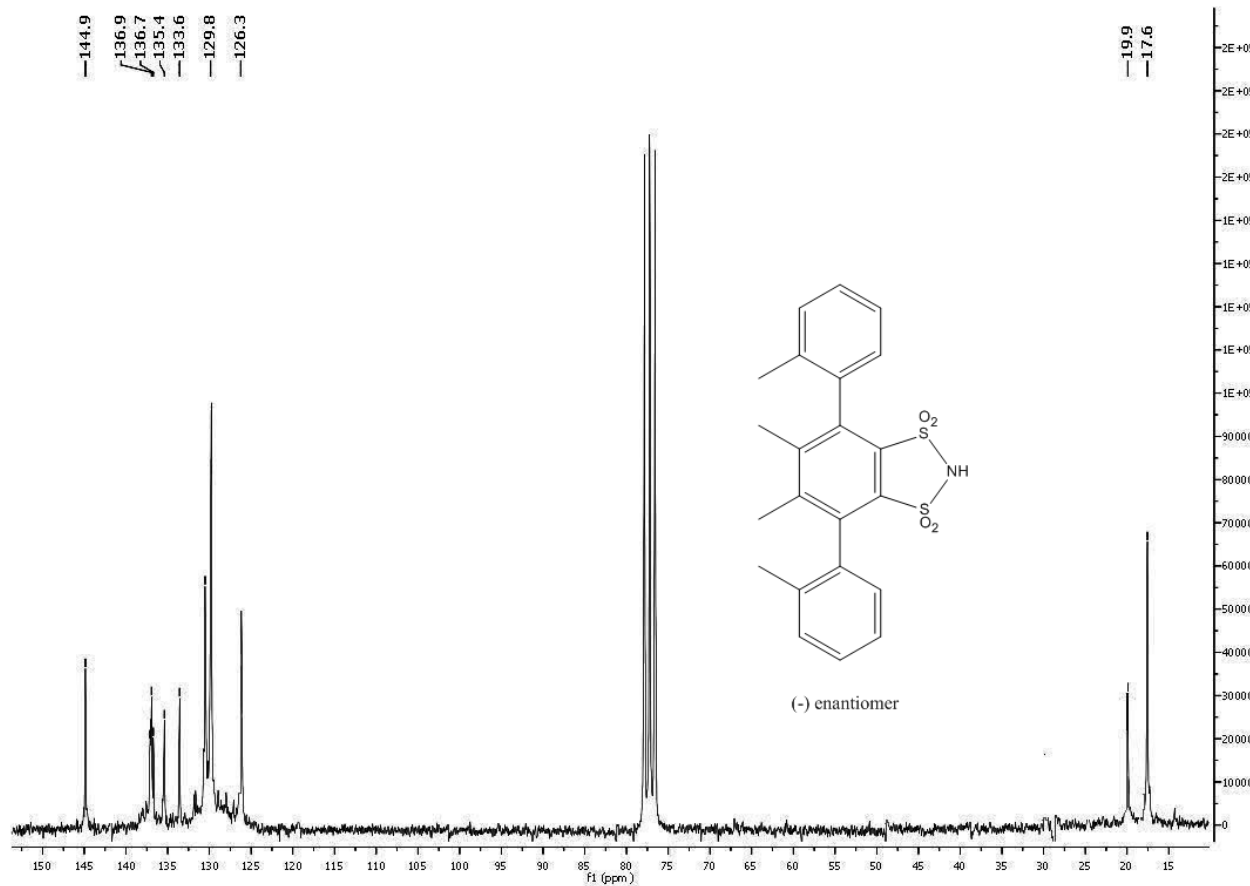

# Expansion between 146-125 ppm

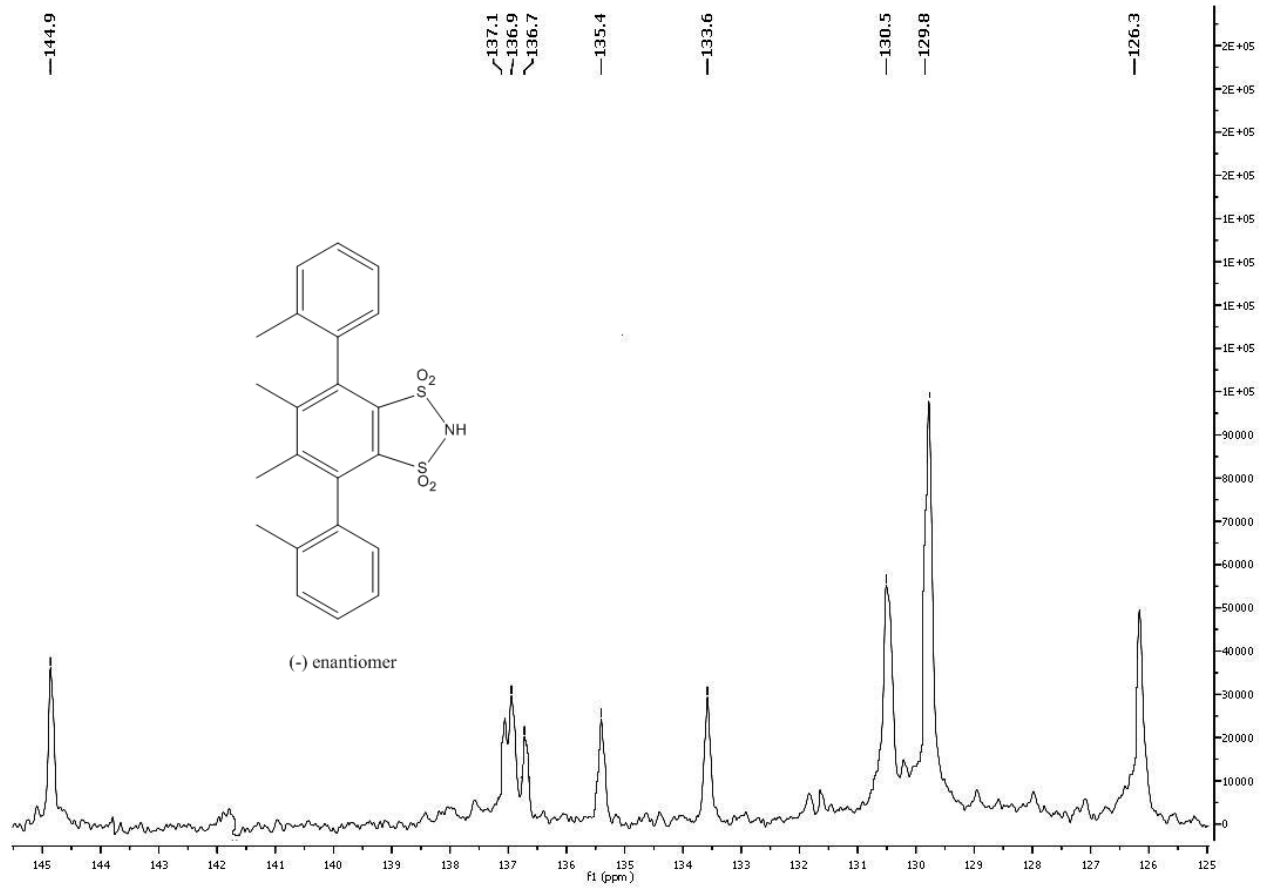

### 11.23 5,6-Dimethyl-4,7-bis(1-naphthyl)isatine (11c)

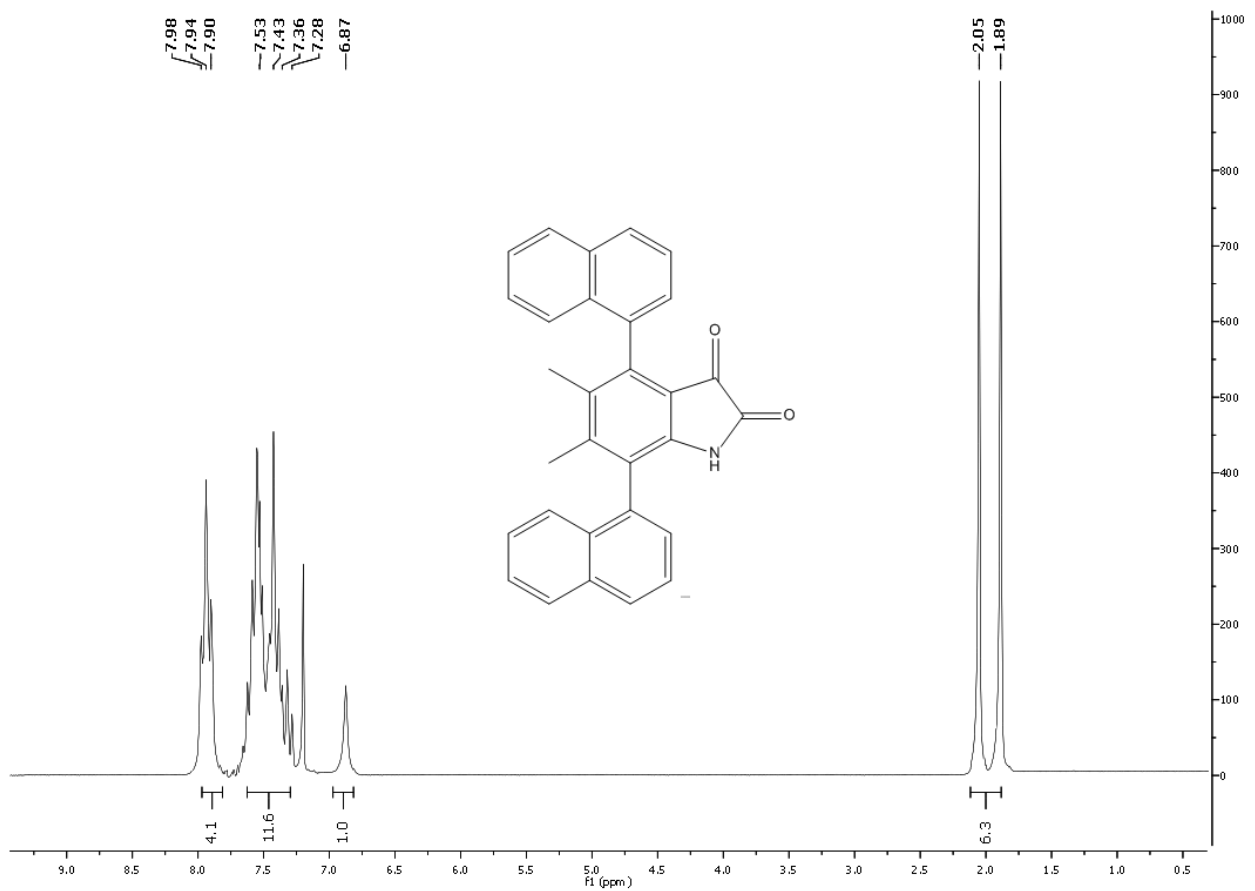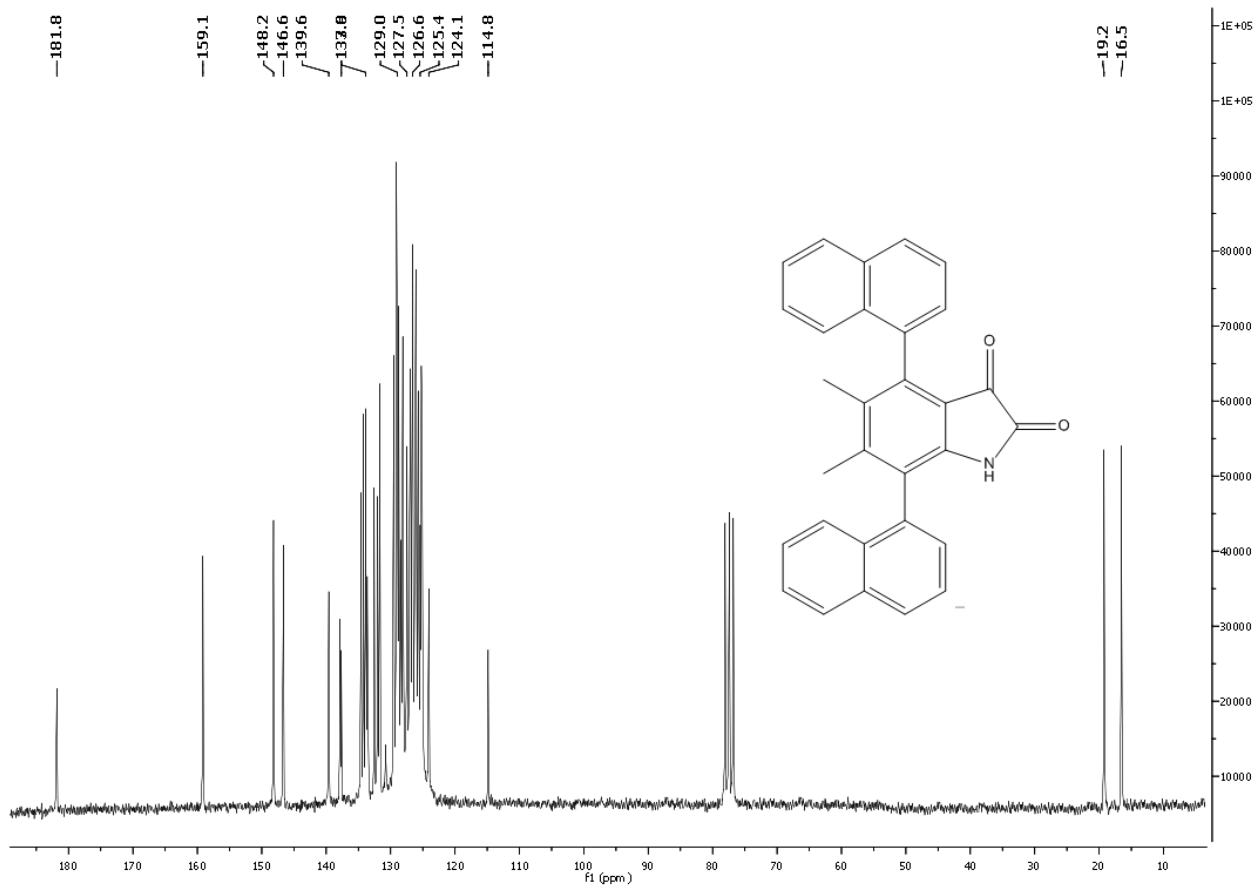

# Expansion between 139-124 ppm

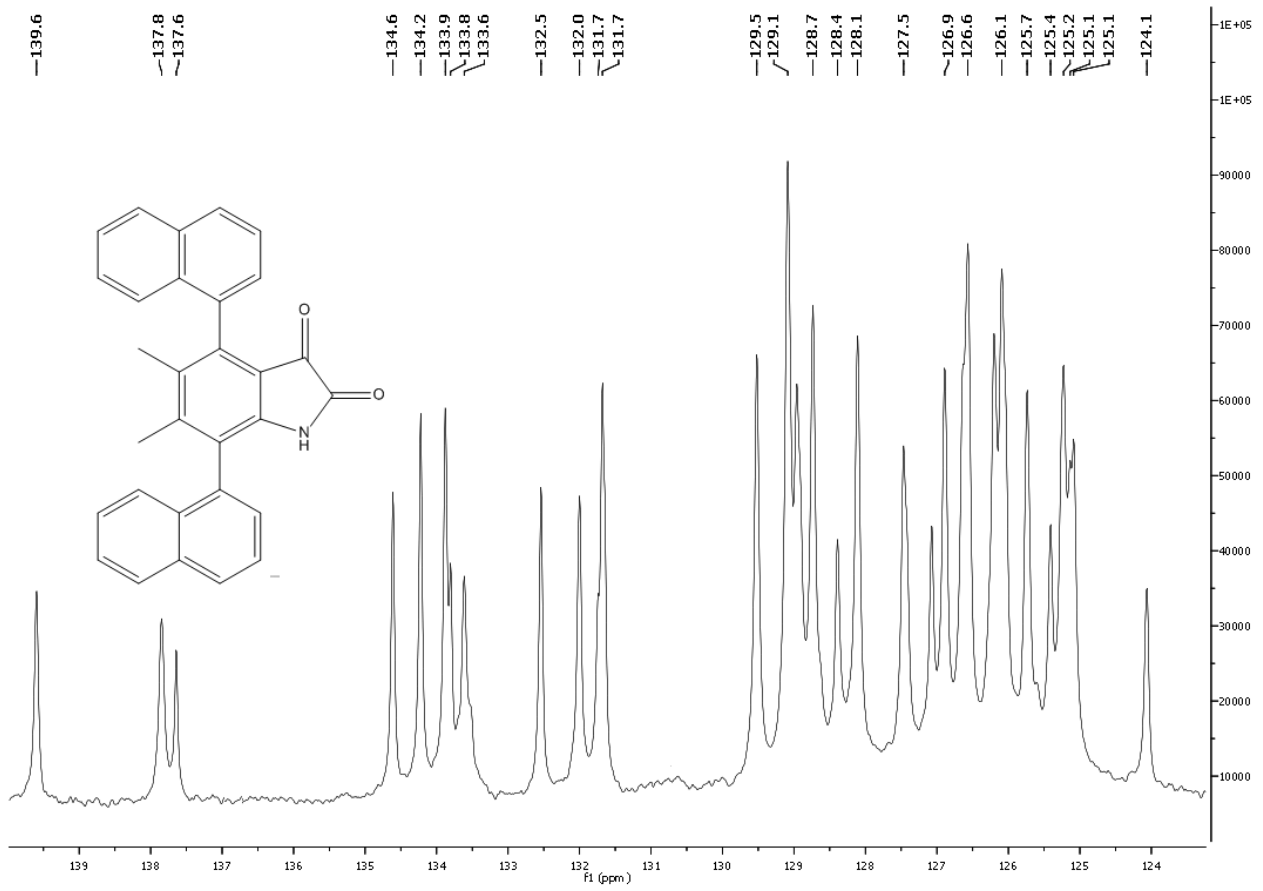

### 11.24 2-Amino-4,5-dimethyl-3,6-bis(1-naphthyl)benzoic acid (12c)

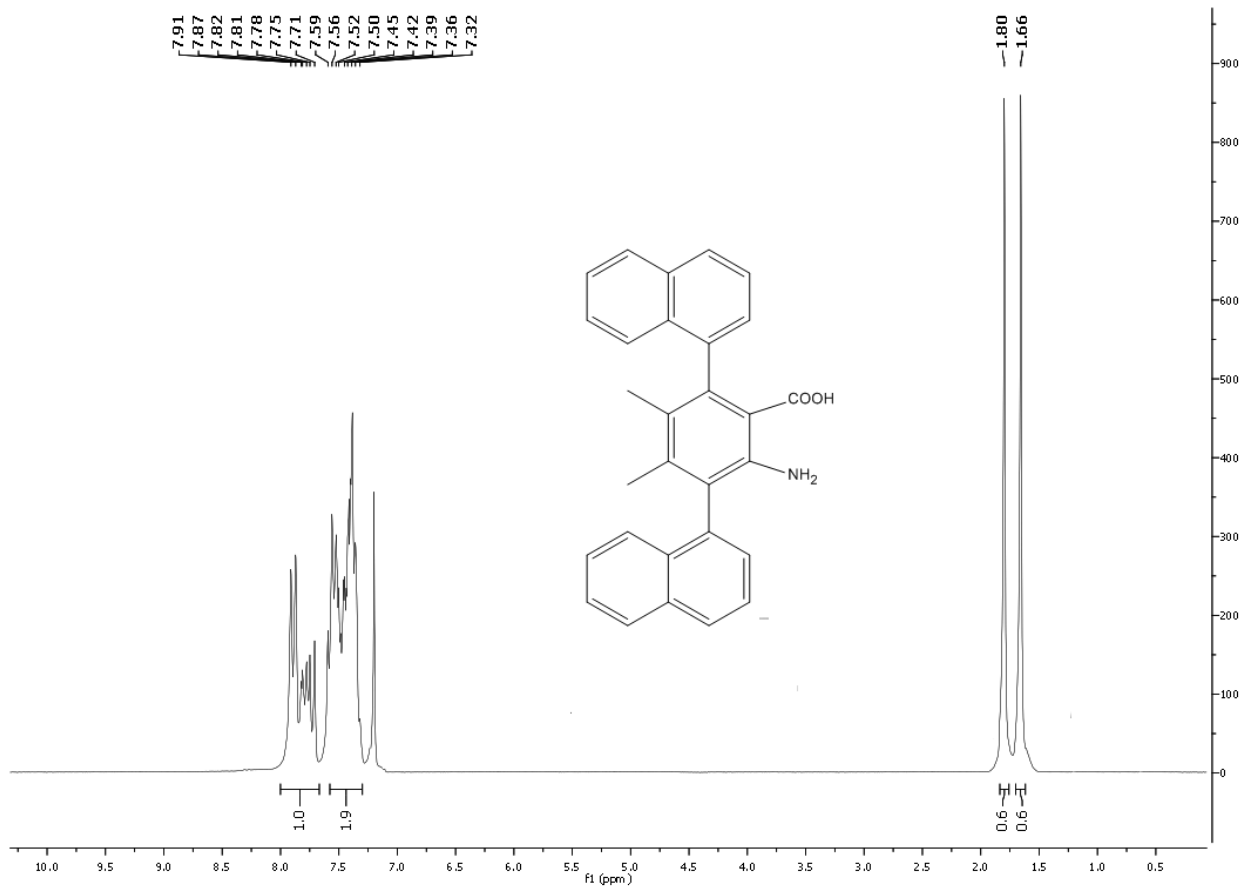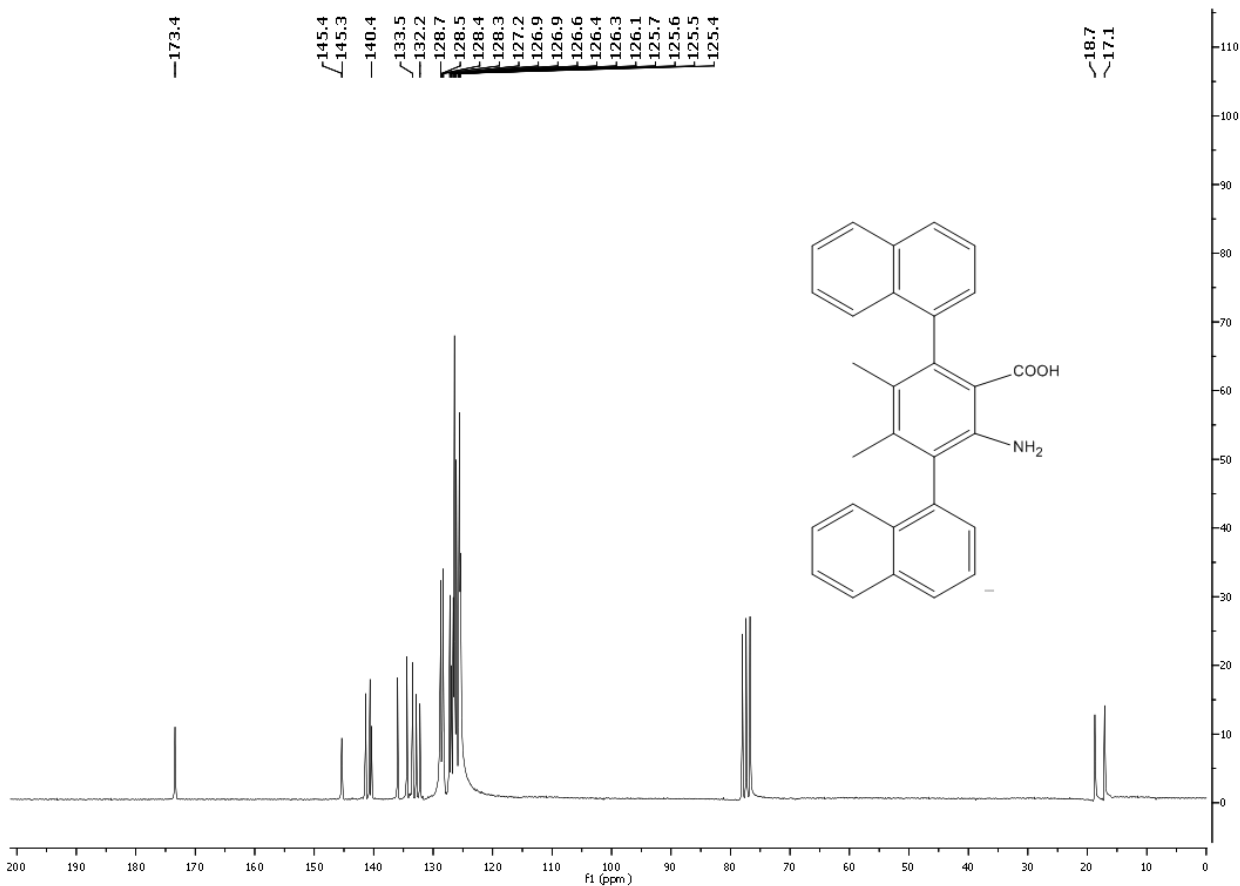

# Expansion between 136-124 ppm

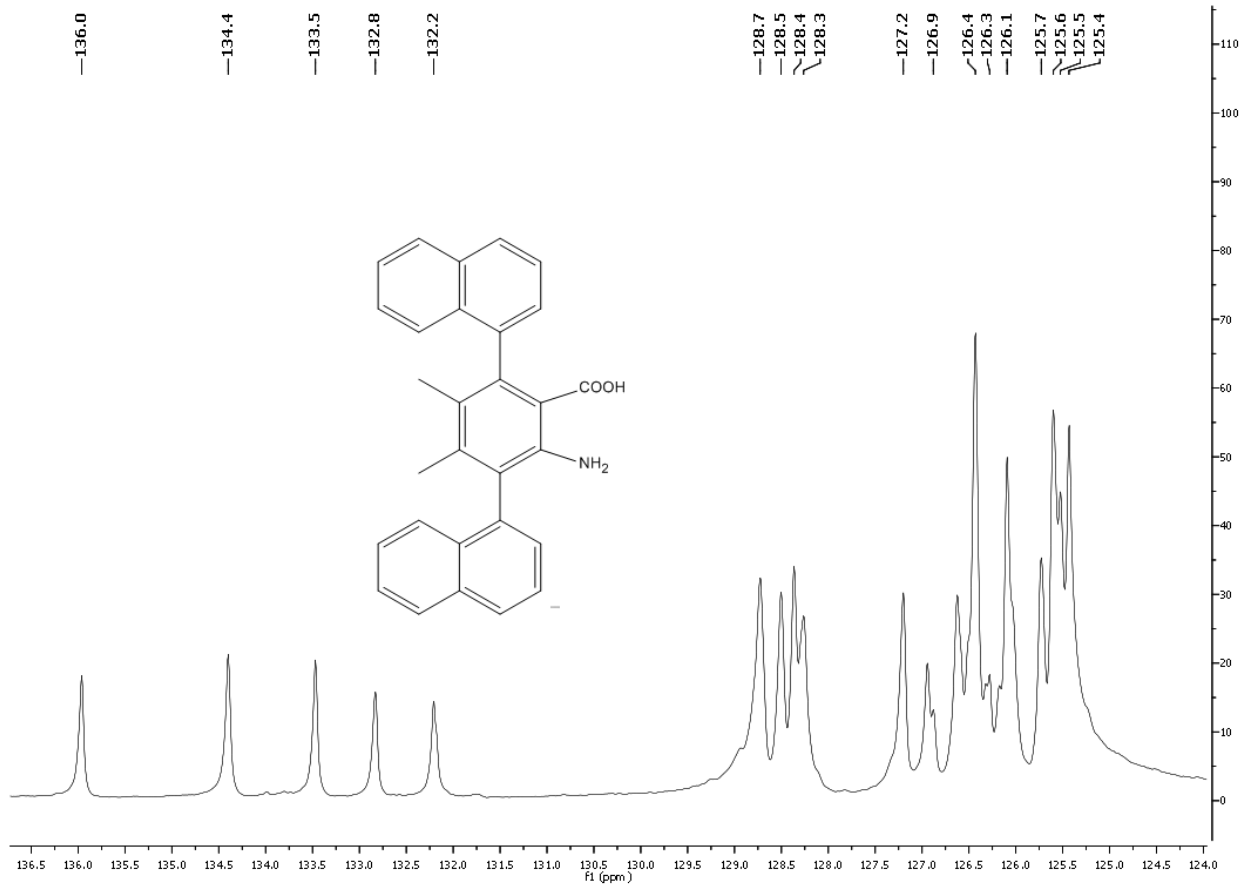

### 11.25 5,6-Dimethyl-2-(3-methylbutoxy)- 4,7-bis(1-naphthyl)-1,3-benzodithiole (13c)

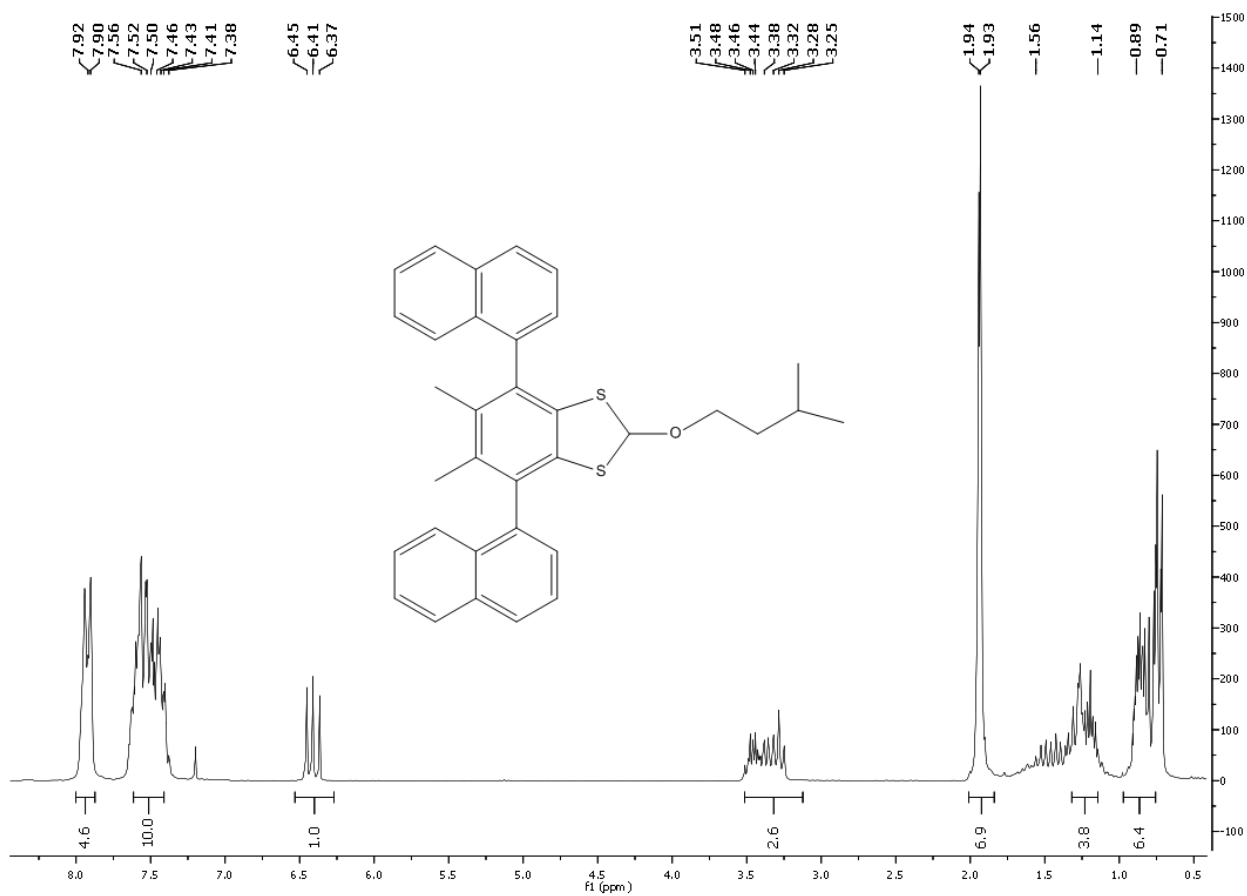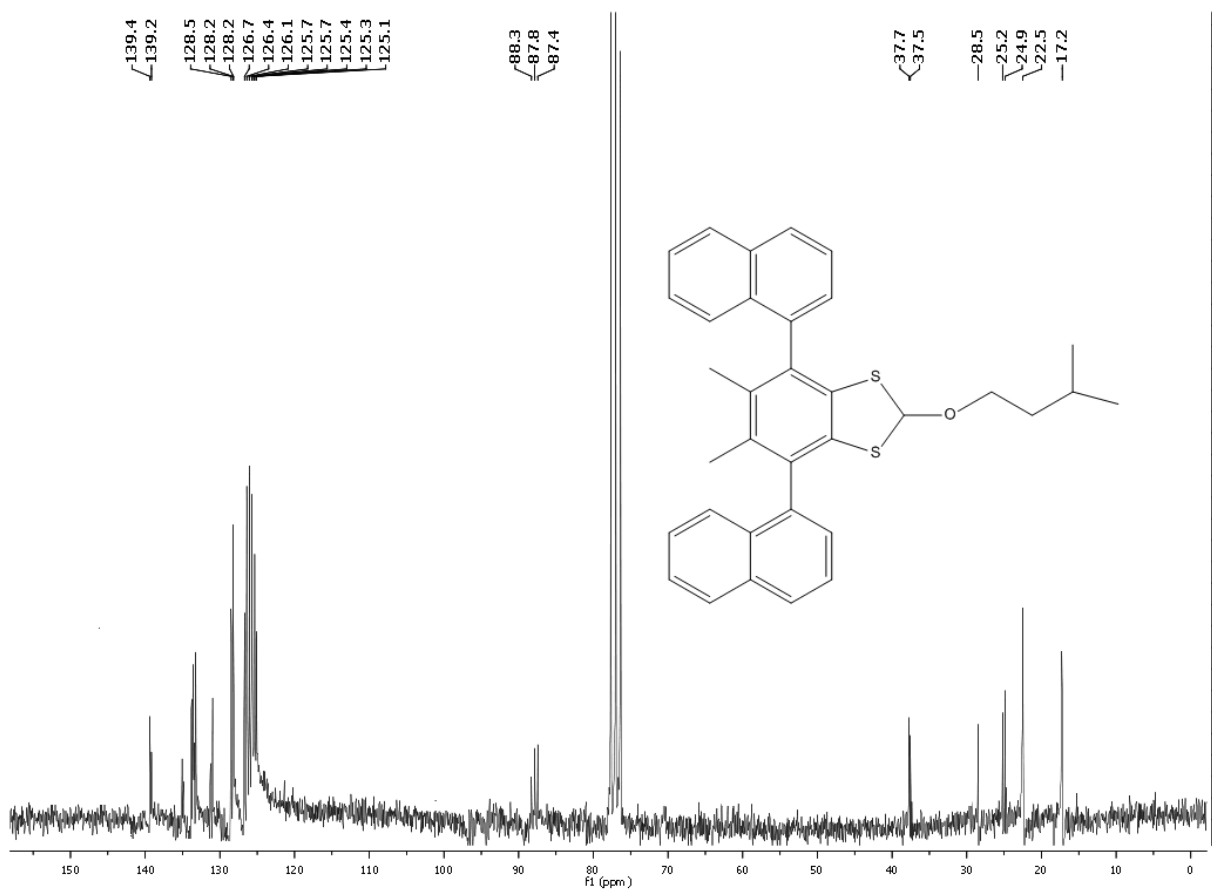



# Expansion between 139-124 ppm

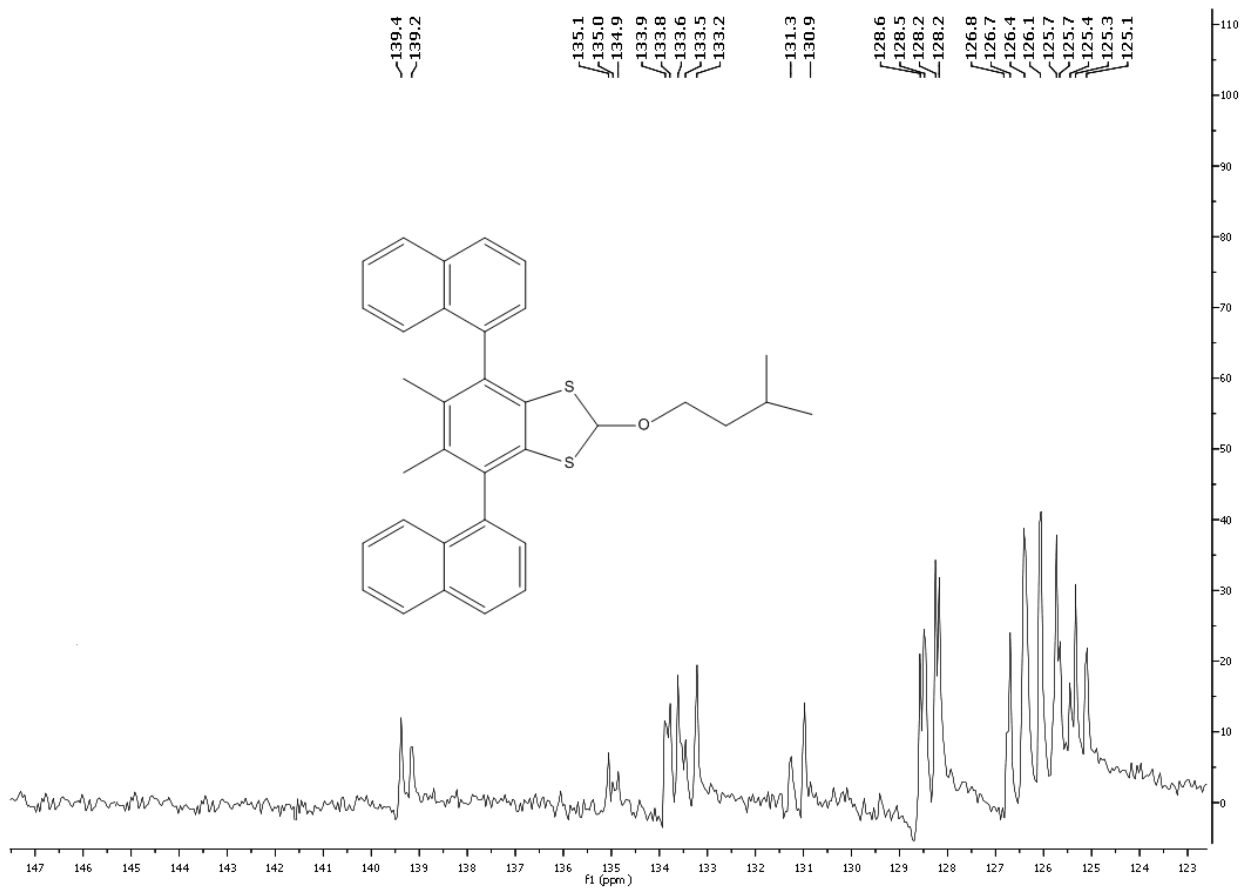

**11.26 4,5-Dimethyl-3,6-bis(1-naphthyl)-1,2-benzenedisulfonyl chloride (mixture of meso form and couple of atropisomers; 14c)**

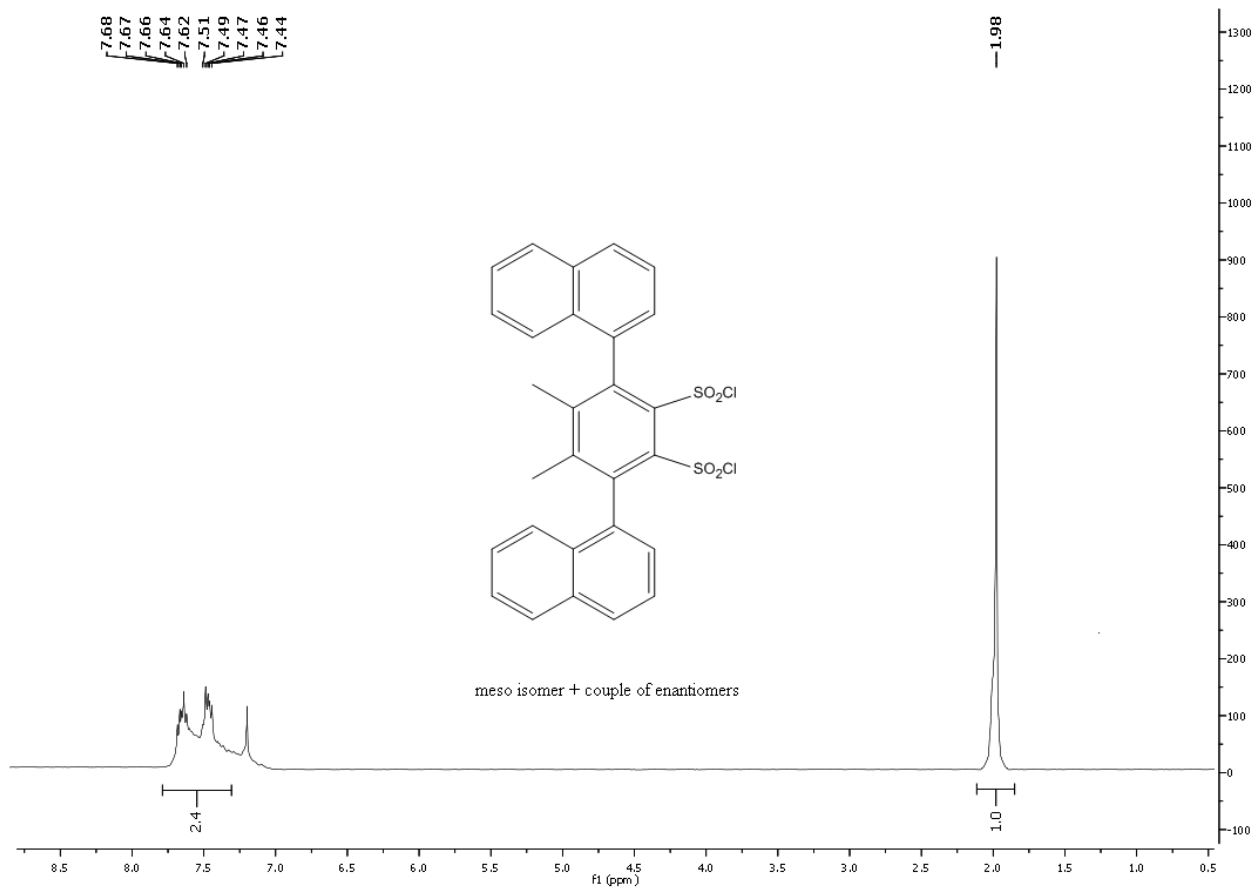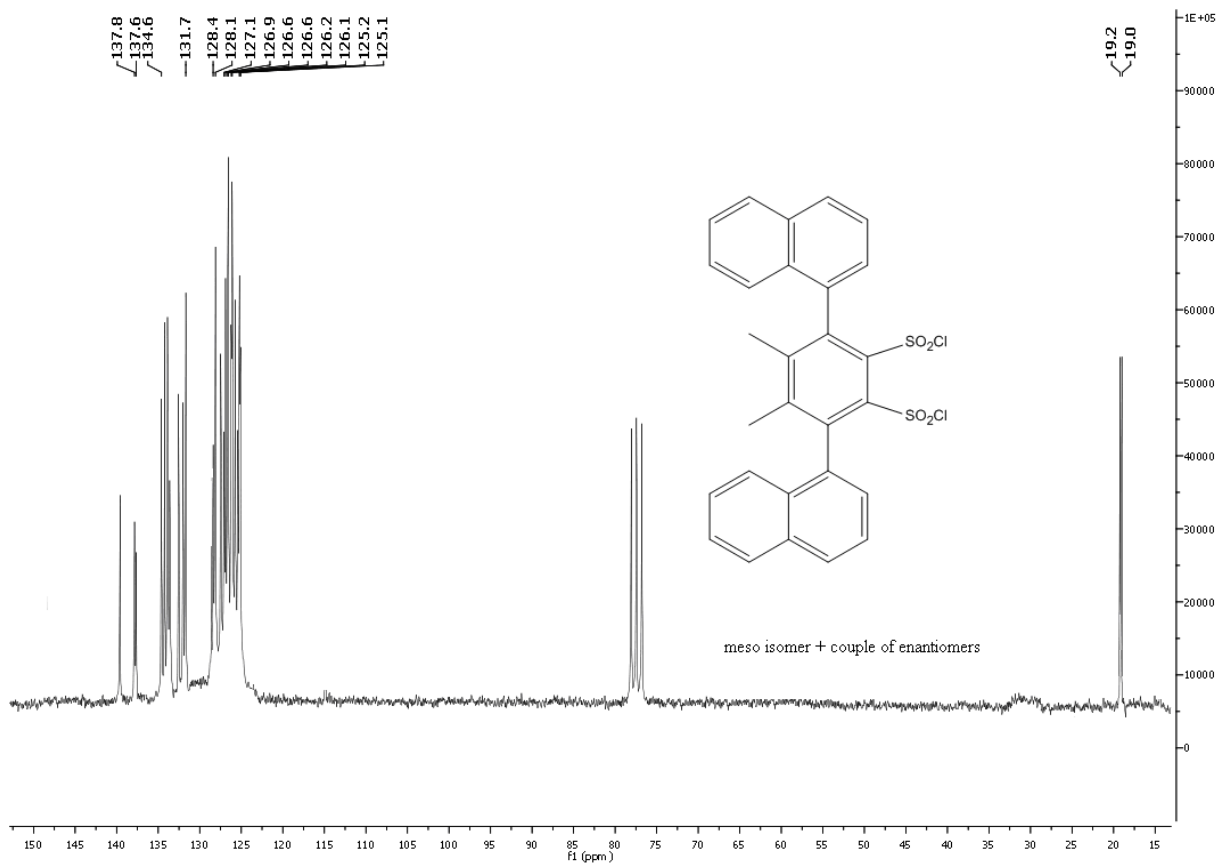

# Expansion between 138-124 ppm

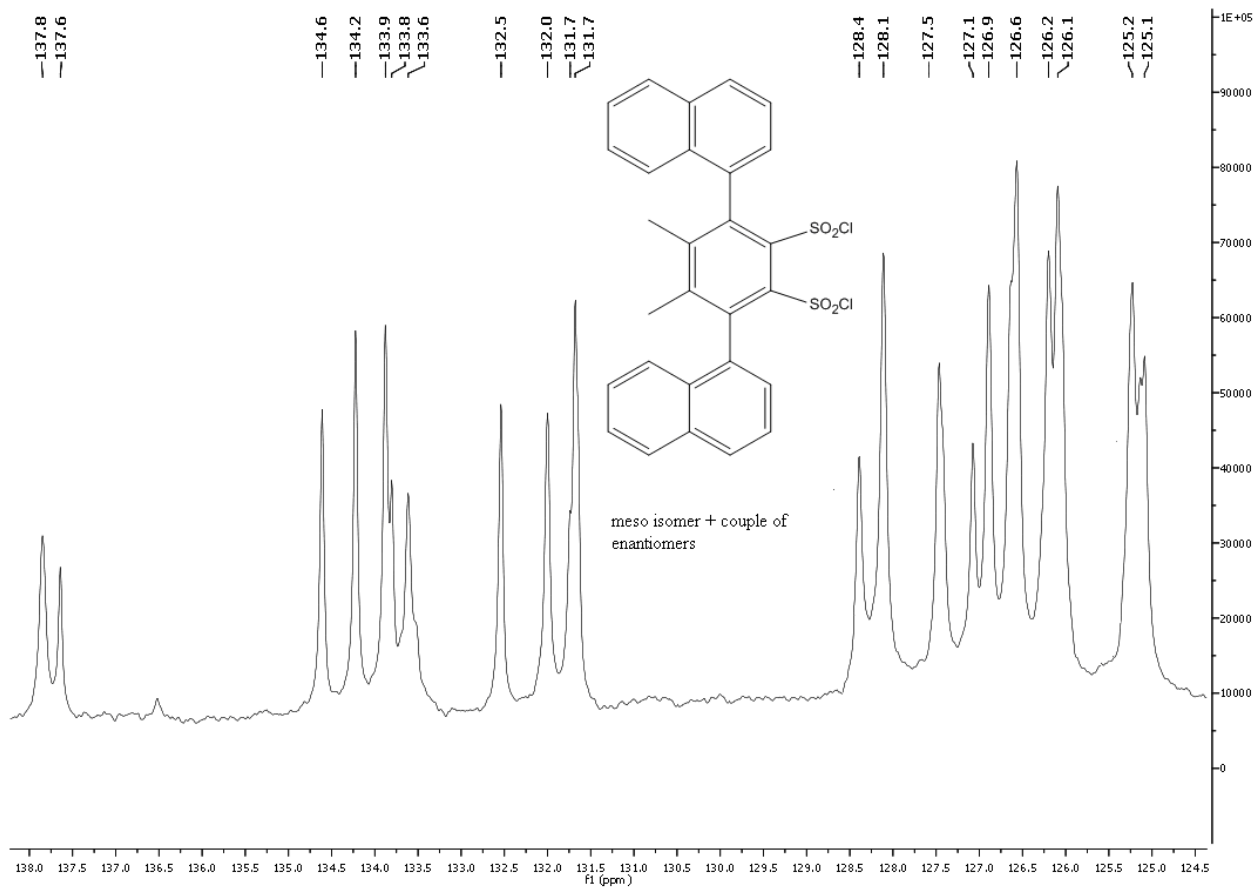

### 11.27 *meso* 4,5-Dimethyl-3,6-bis(1-naphthyl)-1,2-benzenedisulfonyl chloride (14c)

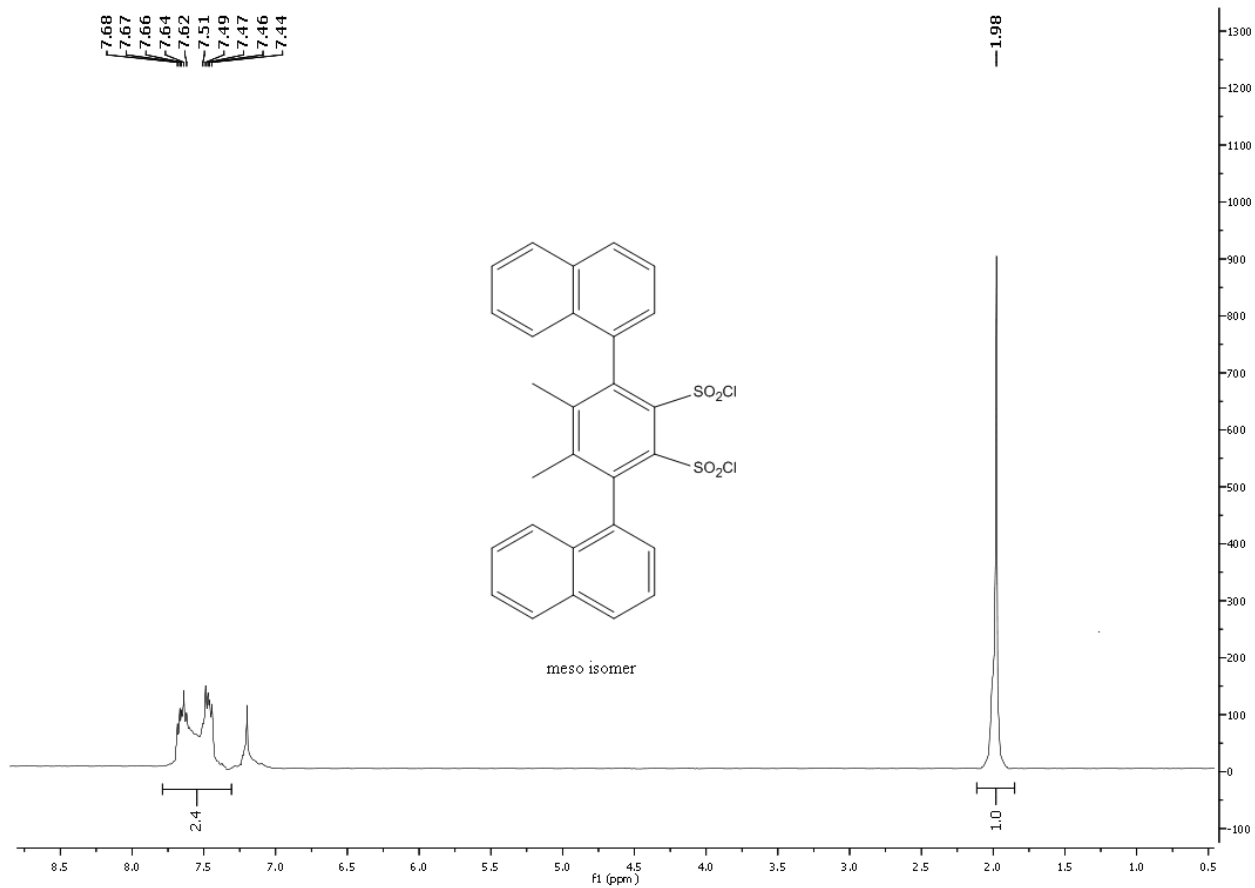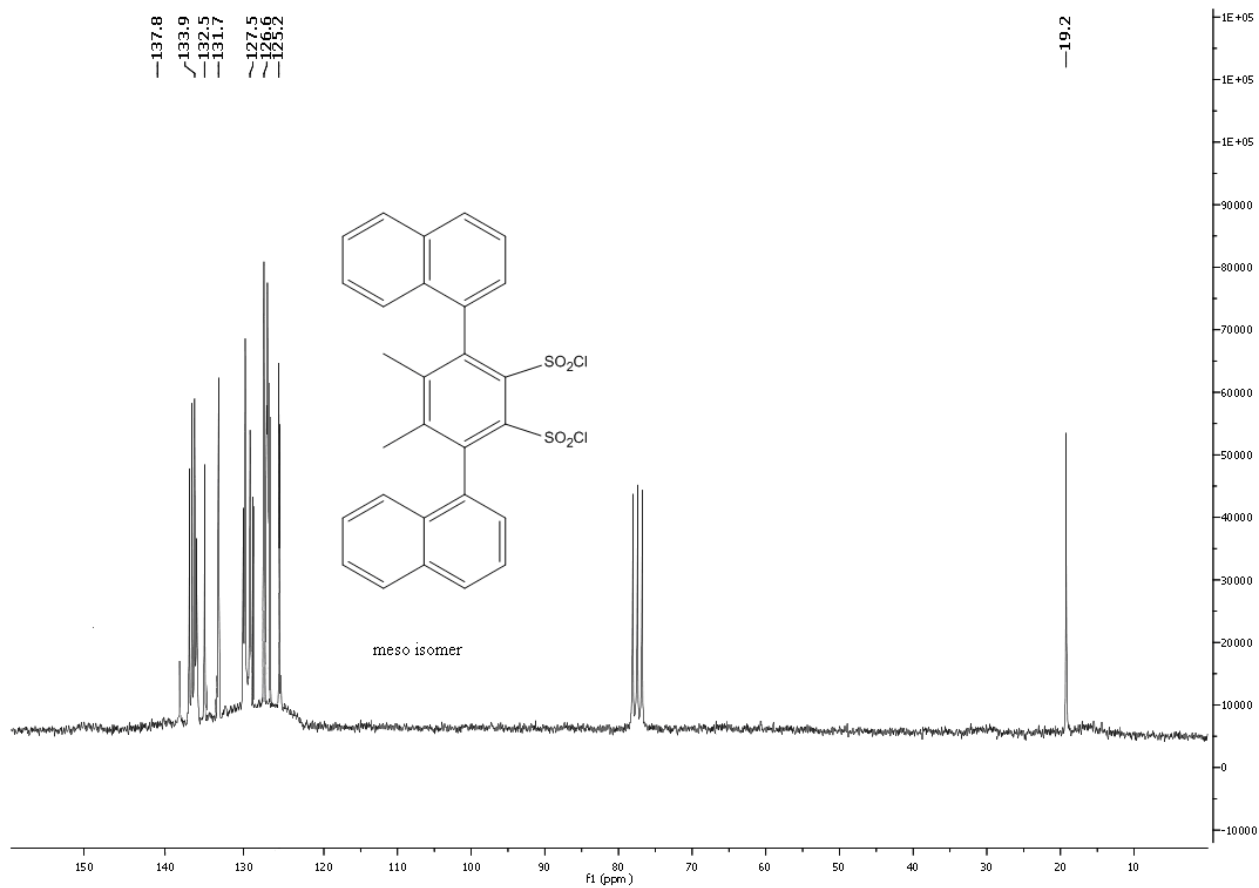

# Expansion between 138-123 ppm

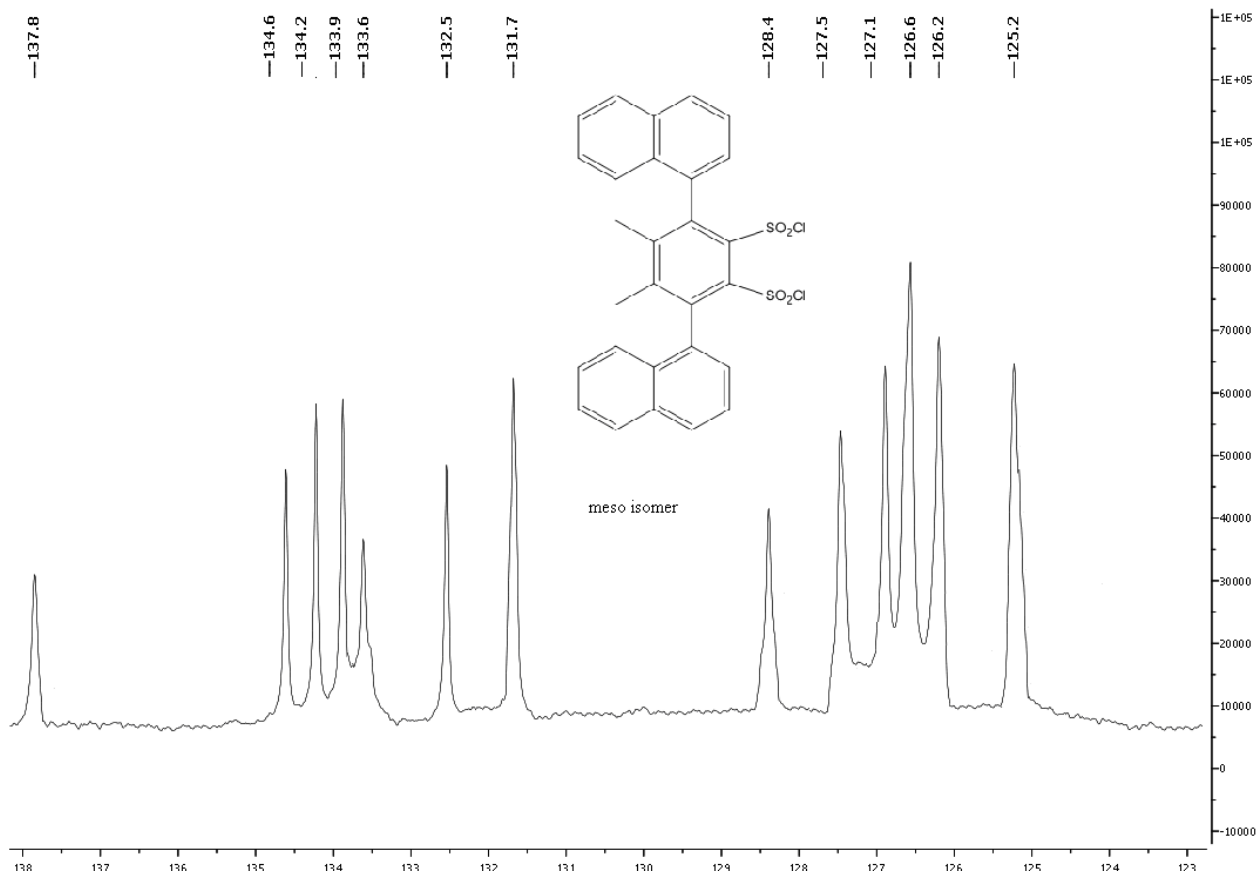

11.28 (-) 4,5-Dimethyl-3,6-bis(1-naphthyl)-1,2-benzenedisulfonyl chloride (14c)

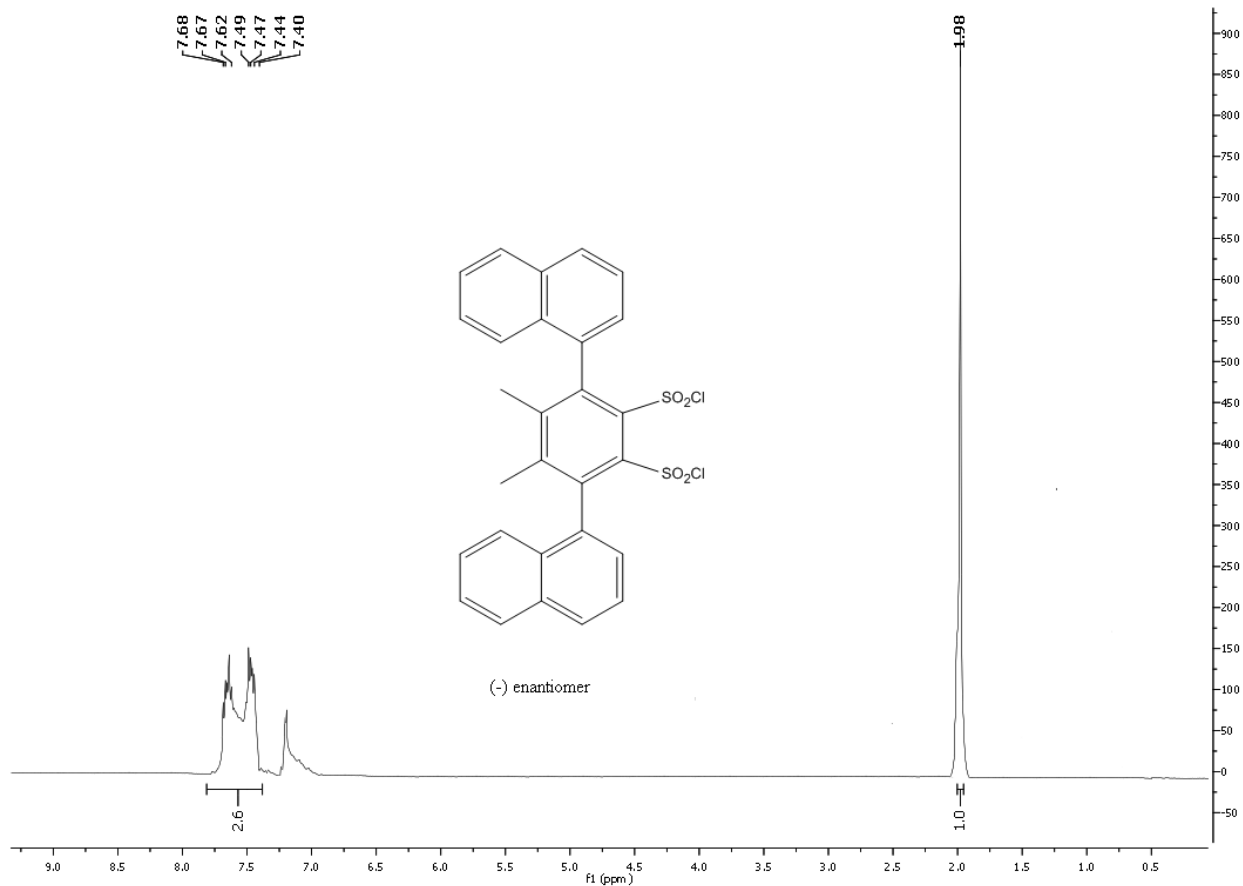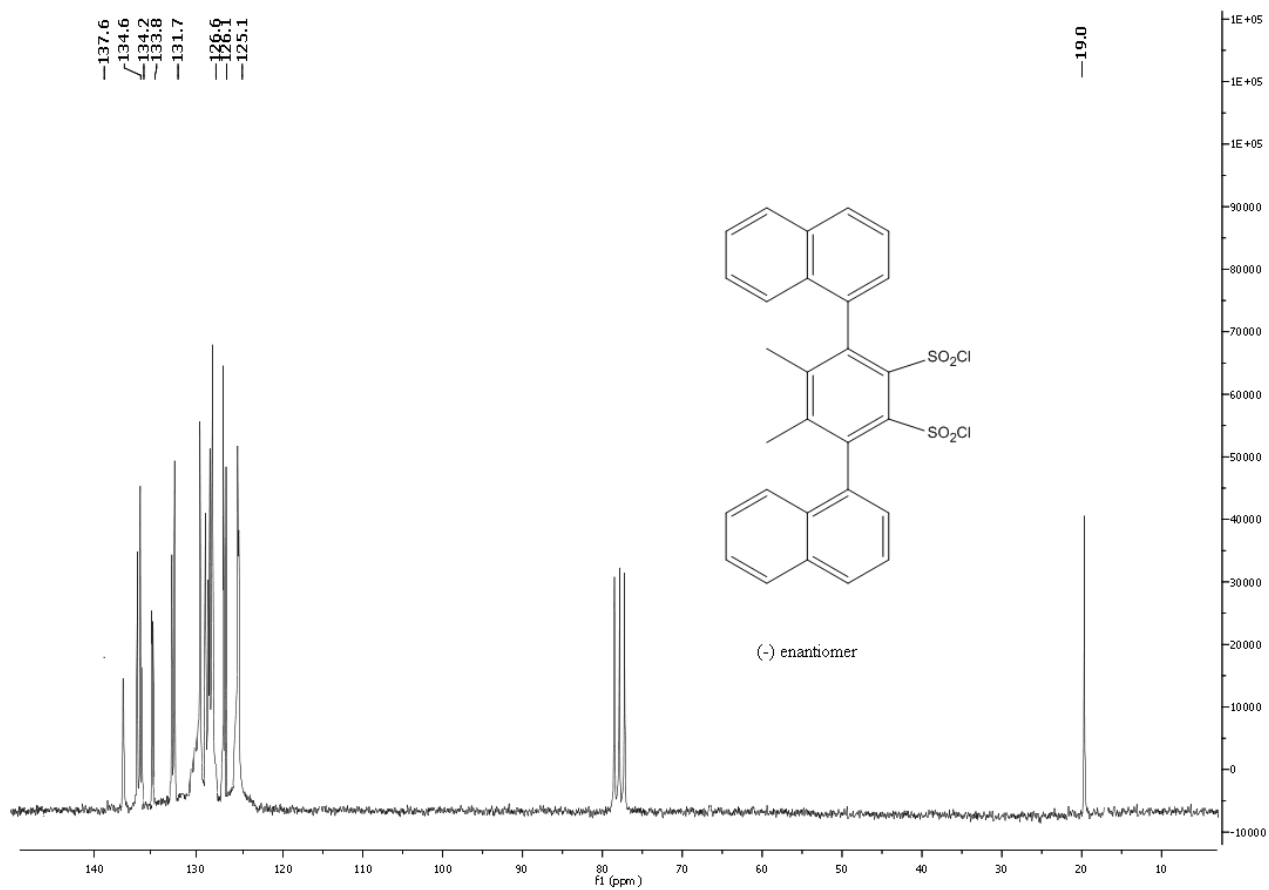

# Expansion between 138-123 ppm

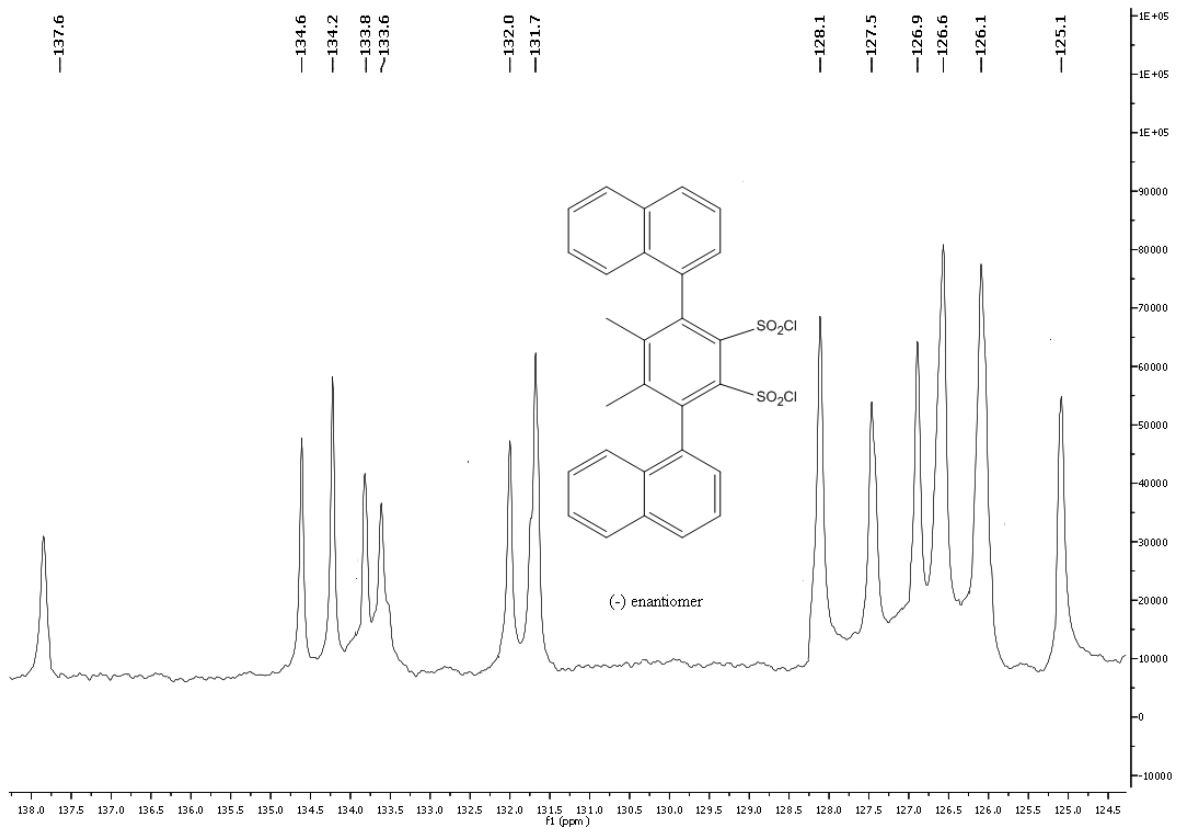

**11.29 4,5-Dimethyl- 3,6-bis(1-naphthyl)-1,2-benzenedisulfonimide (mixture of meso form and couple of atropisomers; 3c)**

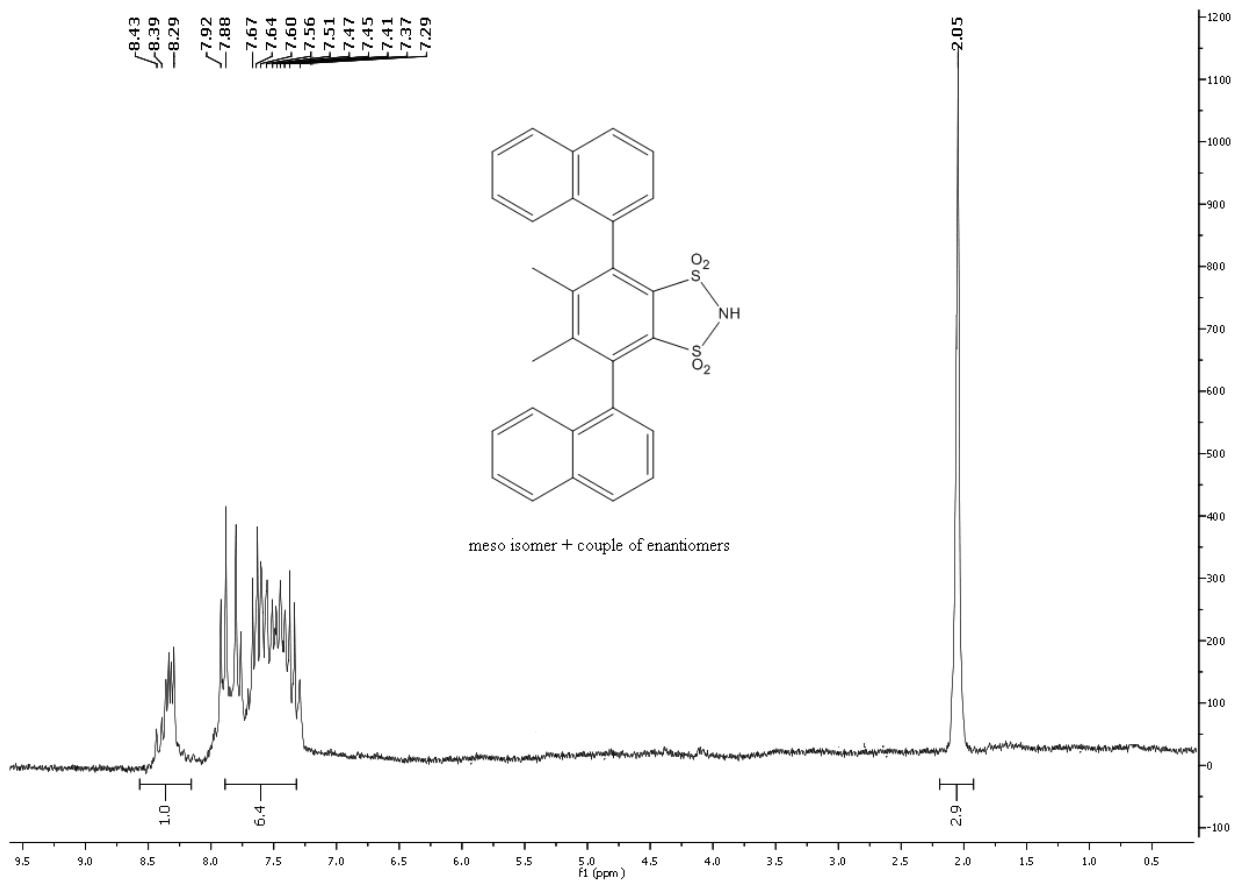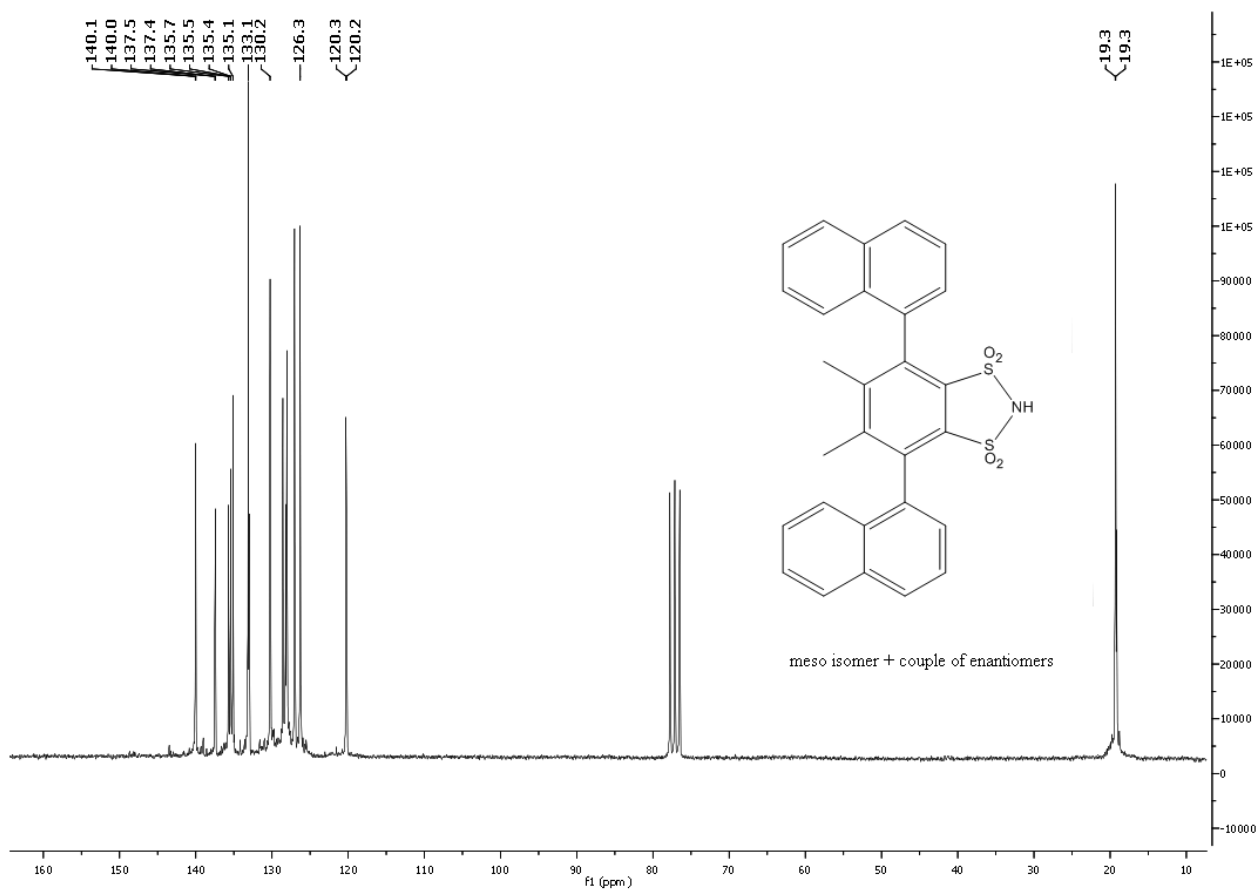



# Expansion between 137-126 ppm

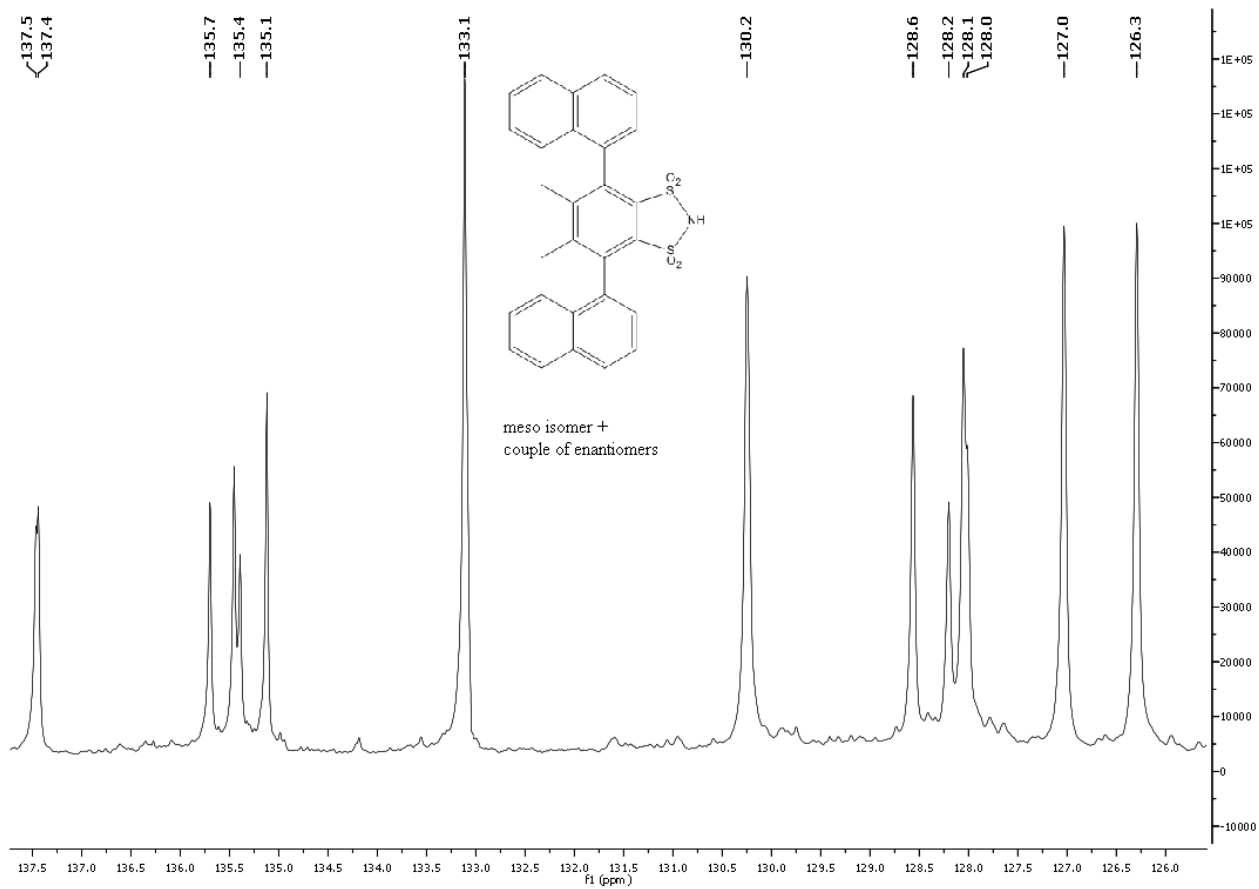

### 11.30 (-) 4,5-Dimethyl-3,6-bis(1-naphthyl)-1,2-benzenedisulfonimide (3c)

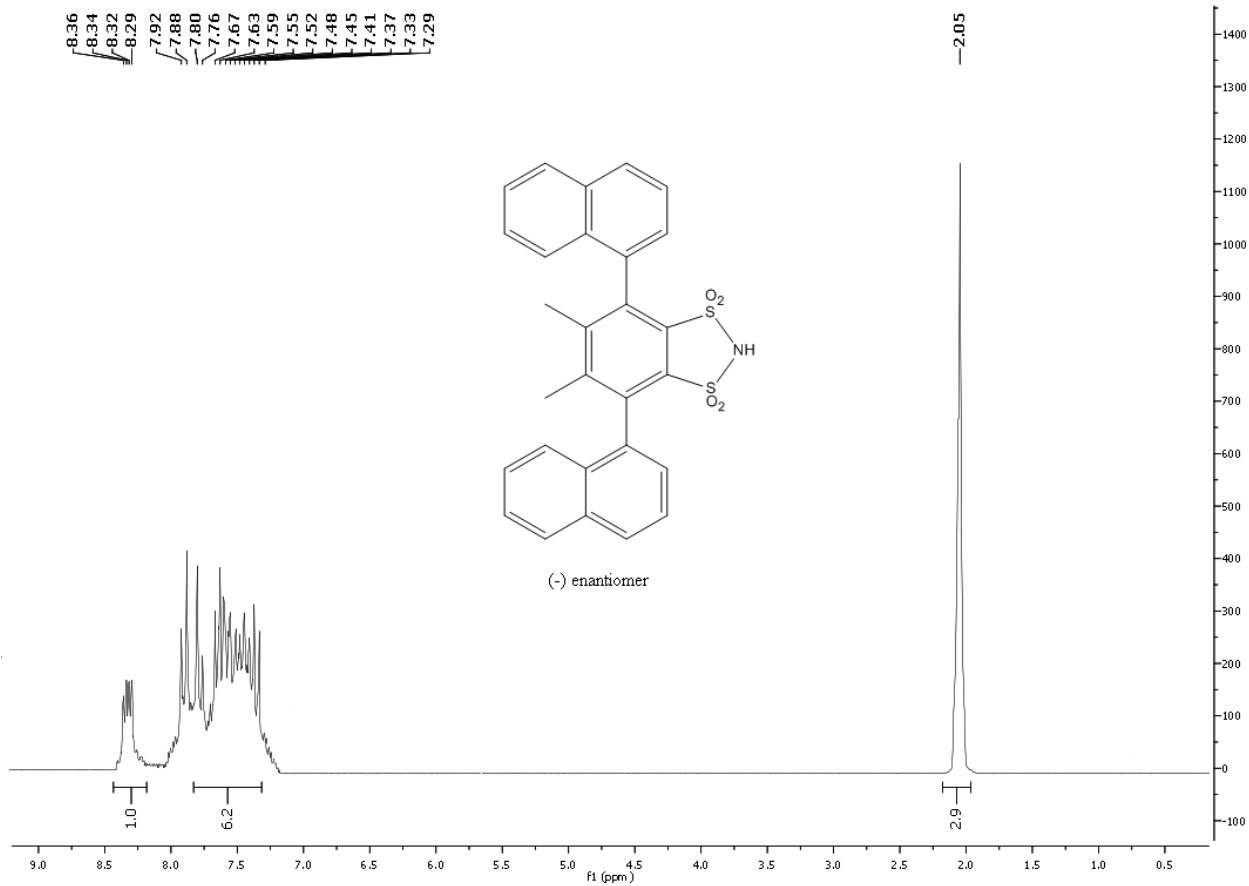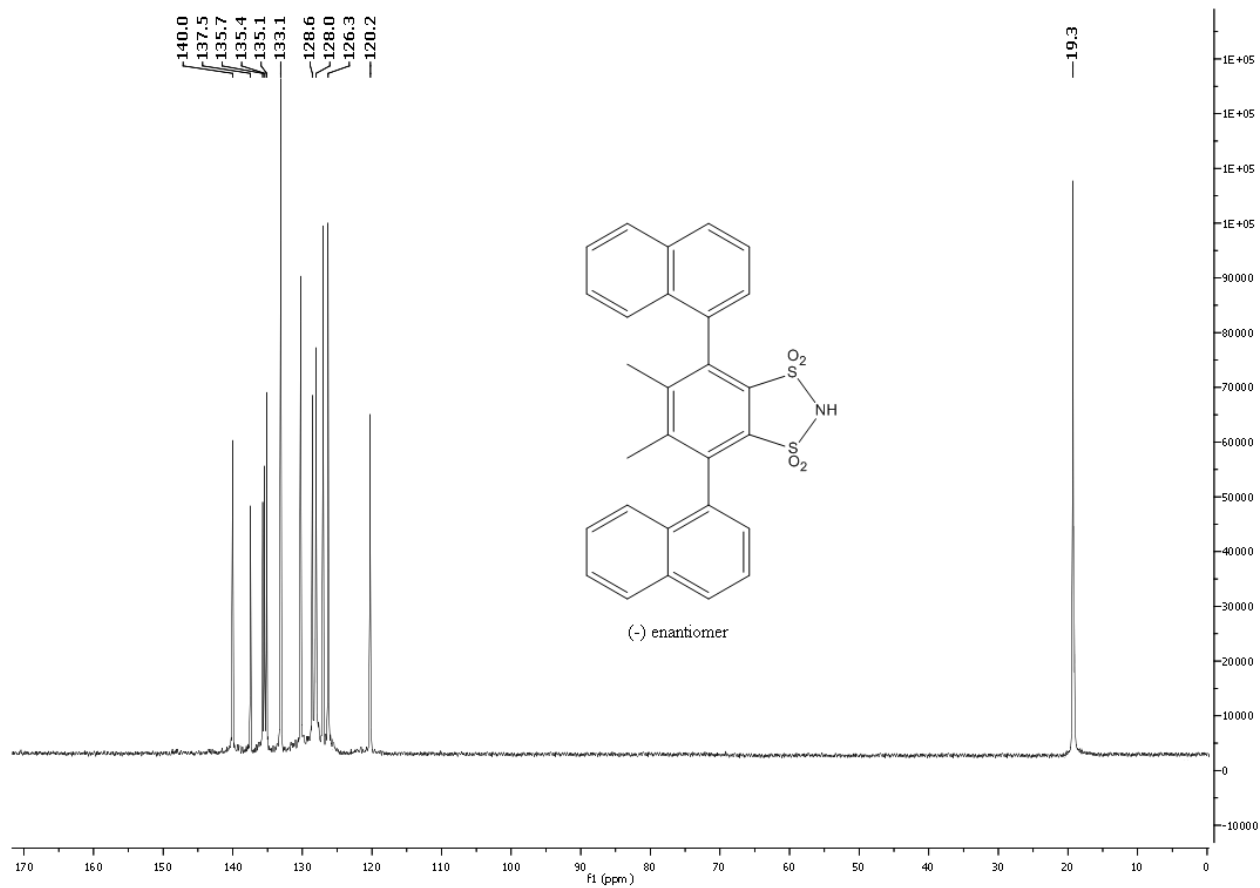

# Expansion between 141-120 ppm

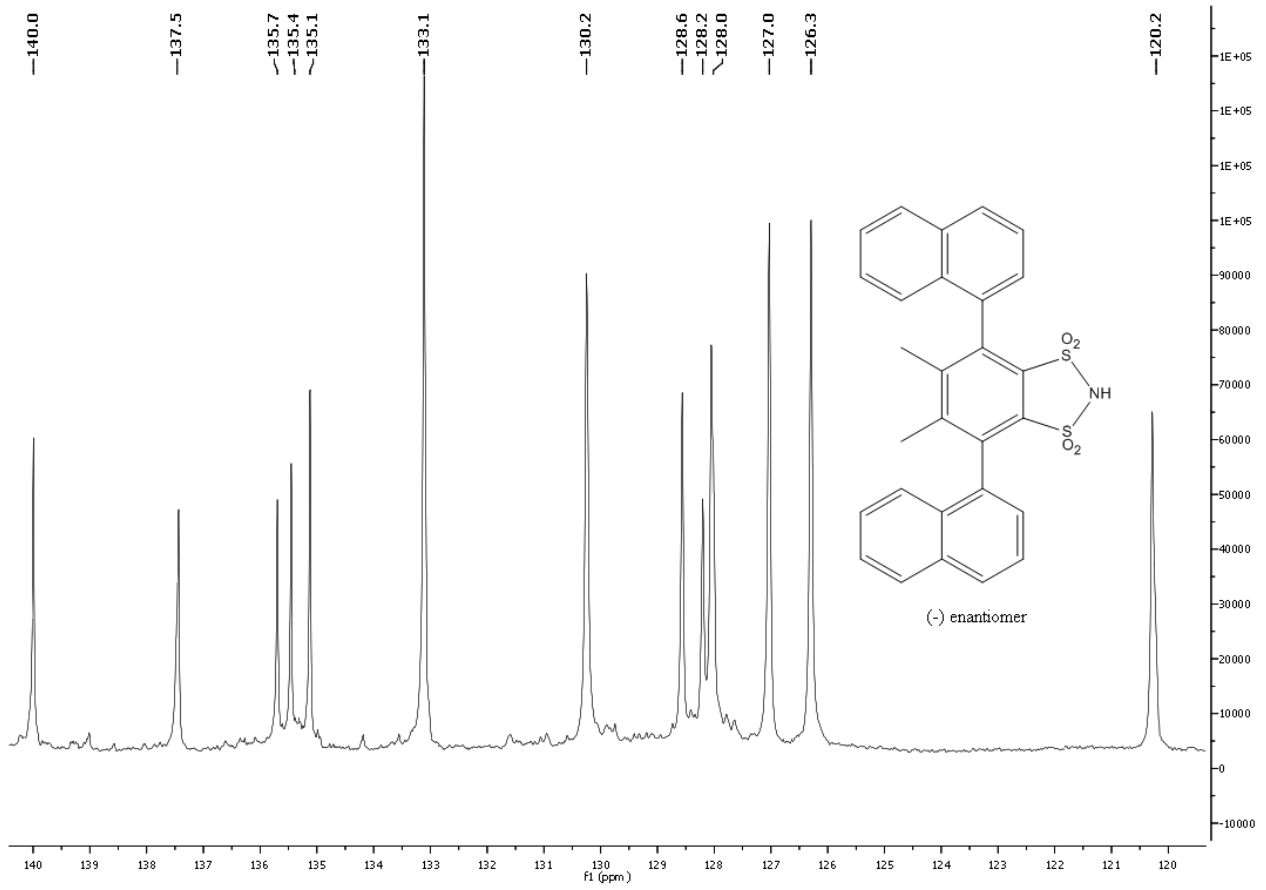

## 12. HPLC spectra of sulfonyl chlorides 14.

### 12.1 Atropisomers of 14a

#### SAMPLE INFORMATION

Sample name: **Atropisomeri solfocloruro monometile** Acquired by: Breeze  
Sample type: Unknown Date acquired: 5/11/2012 15:12:33 AM CEST  
Vial: 1 Acq.Method: solfocloruro  
Injection: # Processed by: Breeze  
Injection volume: 6.00 ul Date processed: 5/11/2012 16:11:36 AM CEST  
Run time: 25 minutes Channel name: 2998 Ch1 254nm@1.2nm  
Sampling rate: 10.00 per sec Channel desc: 2998 Ch1 254nm@1.2nm

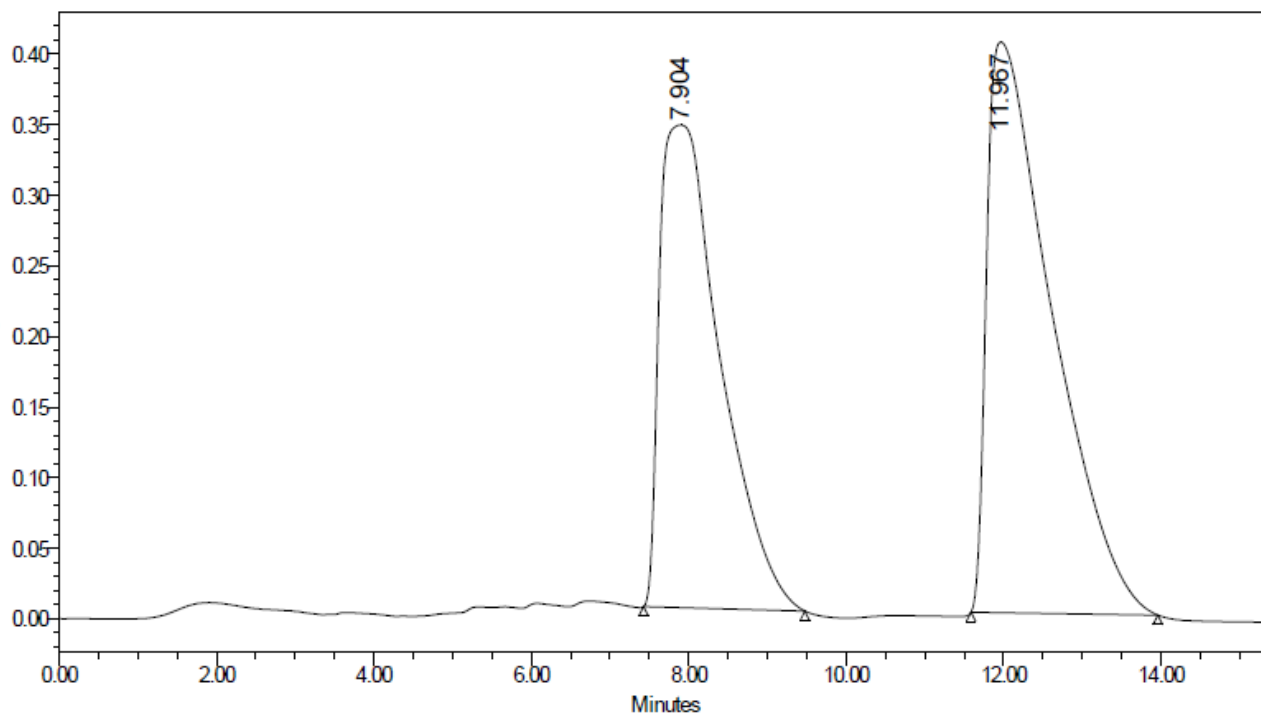

|   | RT(min) | Peak Type      | Area ( $\mu\text{V}\cdot\text{sec}$ ) | % Area | Height ( $\mu\text{V}$ ) | Integration Type | Points Across Peaks | Start Time (min) | End Time (min) |
|---|---------|----------------|---------------------------------------|--------|--------------------------|------------------|---------------------|------------------|----------------|
| 1 | 7.904   | <b>Atrop 1</b> | 18315282                              | 44.01  | 87770                    | BB               | 1670                | 7.428            | 9.477          |
| 2 | 11.967  | <b>Atrop 2</b> | 23301643                              | 55.99  | 43695                    | BB               | 3141                | 11.588           | 13.962         |

## 12.2 Atropisomer (-)14a

### SAMPLE INFORMATION

Sample name: **Enantiomeri solfochloruro monometile**      Acquired by: Breeze  
 Sample type: Unknown      Date acquired: 3/11/2014 08:32:15 AM CEST  
 Vial: 1      Acq.Method: solfochloruro  
 Injection: #      Processed by: Breeze  
 Injection volume: 6.00 ul      Date processed: 3/11/2014 09:10:37 AM CEST  
 Run time: 25 minutes      Channel name: 2998 Ch1 254nm@1.2nm  
 Sampling rate: 10.00 per sec      Channel desc: 2998 Ch1 254nm@1.2nm

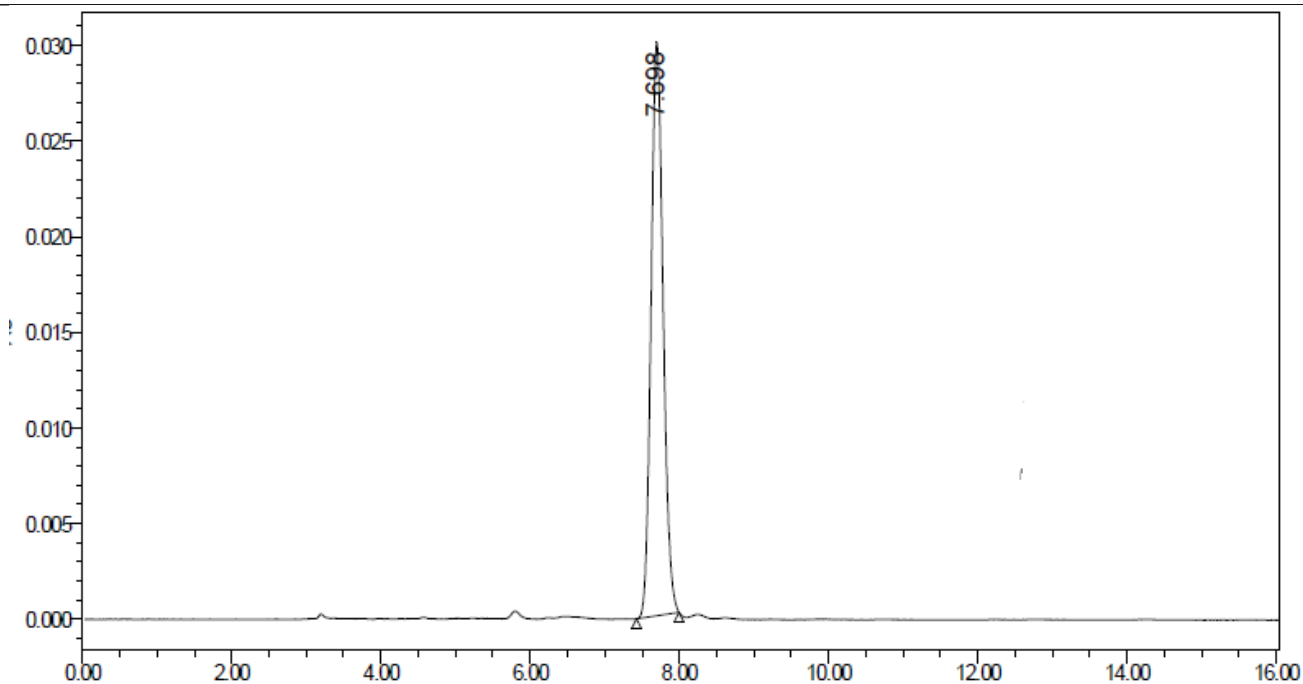

|   | RT(min) | Peak Type     | Area (μV*sec) | Area % | Height (μV) | Integration Type | Points Across Peaks | Start Time (min) | End Time (min) |
|---|---------|---------------|---------------|--------|-------------|------------------|---------------------|------------------|----------------|
| 1 | 7.698   | <b>(-)14a</b> | 337038        | 100.0  | 29981       | BB               | 342                 | 7.425            | 7.995          |

### 12.3 Mixture of meso isomer and couple of atropisomers of 14b

#### SAMPLE INFORMATION

Sample name: **Atropisomeri solfocloruro**

Acquired by: Breeze

Sample type: Unknown

Date acquired: 8/12/2013 10:00:12 AM CEST

Vial: 1

Acq.Method: solfocloruro

Injection: #

Processed by: Breeze

Injection volume: 6.00 ul

Date processed: 8/12/2013 11:15:37 AM CEST

Run time: 25 minutes

Channel name: 2998 Ch1 254nm@1.2nm

Sampling rate: 10.00 per sec

Channel desc: 2998 Ch1 254nm@1.2nm

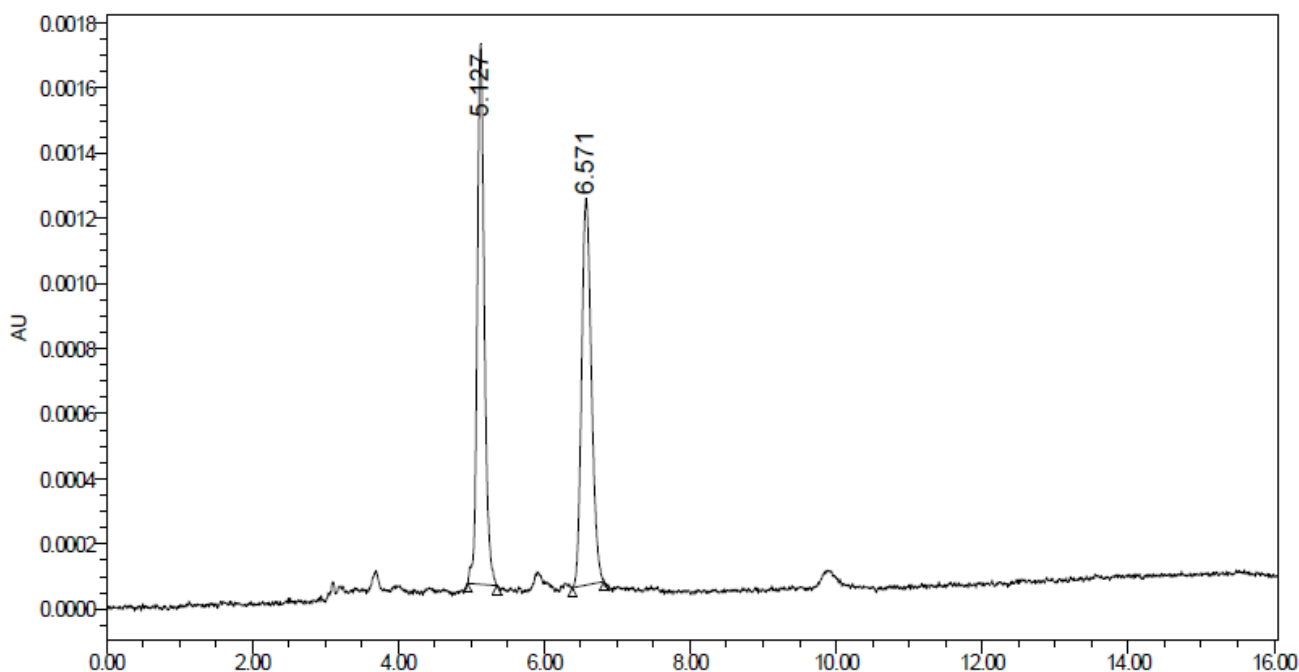

|   | RT(min) | Peak Type         | Area (μV*sec) | % Area | Height (μV) | Integration Type | Points Across Peaks | Start Time (min) | End Time (min) |
|---|---------|-------------------|---------------|--------|-------------|------------------|---------------------|------------------|----------------|
| 1 | 5.127   | <b>Forma meso</b> | 11174         | 50.34  | 1659        | BB               | 240                 | 4.952            | 5.352          |
| 2 | 6.571   | <b>Atrop</b>      | 11020         | 49.66  | 1187        | BB               | 259                 | 6.387            | 6.818          |

## 12.4 Atropisomers of 14b

### SAMPLE INFORMATION

|                                                |                                            |
|------------------------------------------------|--------------------------------------------|
| Sample name: <b>Atropisomeri solfochloruro</b> | Acquired by: Breeze                        |
| Sample type: Unknown                           | Date acquired: 8/14/2013 09:08:29 AM CEST  |
| Vial: 1                                        | Acq.Method: solfochloruro                  |
| Injection: #                                   | Processed by: Breeze                       |
| Injection volume: 6.00 ul                      | Date processed: 8/14/2013 10:02:37 AM CEST |
| Run time: 25 minutes                           | Channel name: 2998 Ch1 254nm@1.2nm         |
| Sampling rate: 4.00 per sec                    | Channel desc: 2998 Ch1 254nm@1.2nm         |

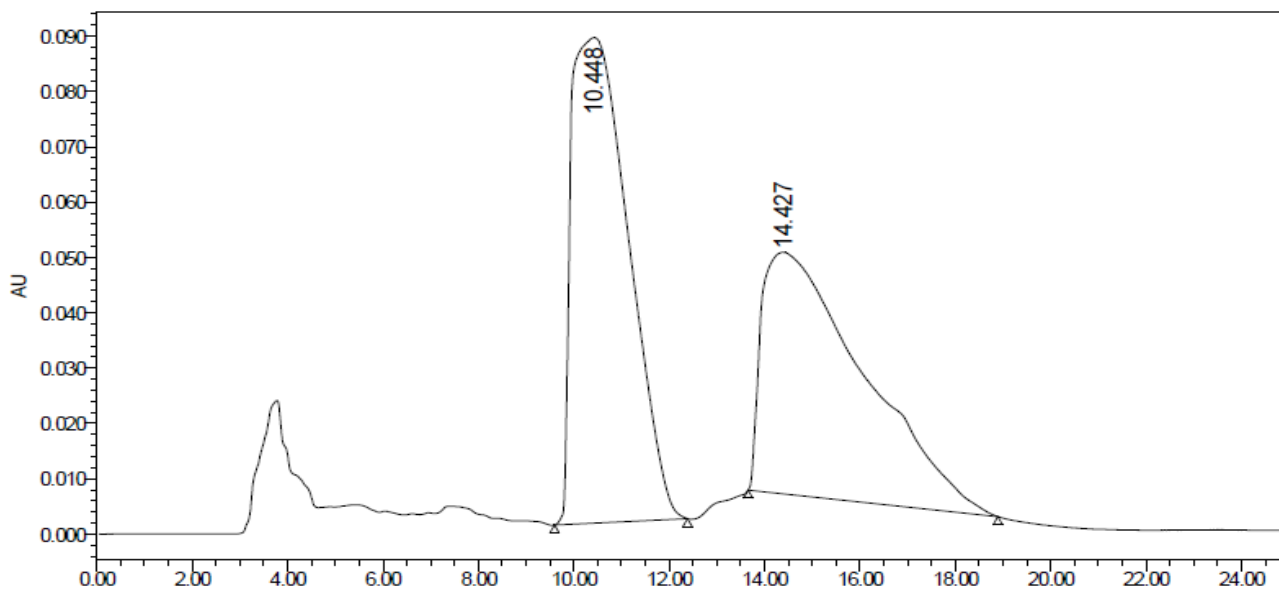

|   | RT(min) | Peak Type      | Area ( $\mu\text{V}\cdot\text{sec}$ ) | % Area | Height ( $\mu\text{V}$ ) | Integration Type | Points Across Peaks | Start Time (min) | End Time (min) |
|---|---------|----------------|---------------------------------------|--------|--------------------------|------------------|---------------------|------------------|----------------|
| 1 | 10.448  | <b>Atrop 1</b> | 7277304                               | 52.72  | 87770                    | BB               | 1670                | 9.568            | 12.382         |
| 2 | 14.427  | <b>Atrop 2</b> | 6527146                               | 47.28  | 43695                    | BB               | 3141                | 13.665           | 18.890         |

## 12.5 Atropisomer (-)14b

### SAMPLE INFORMATION

Sample name: **Enantiomeri solfocloruro**      Acquired by: Breeze  
 Sample type: Unknown      Date acquired: 3/10/2014 08:12:37 AM CEST  
 Vial: 1      Acq.Method: solfocloruro  
 Injection: #      Processed by: Breeze  
 Injection volume: 6.00 ul      Date processed: 3/10/2014 09:04:55 AM CEST  
 Run time: 25 minutes      Channel name: 2998 Ch1 254nm@1.2nm  
 Sampling rate: 10.00 per sec      Channel desc: 2998 Ch1 254nm@1.2nm

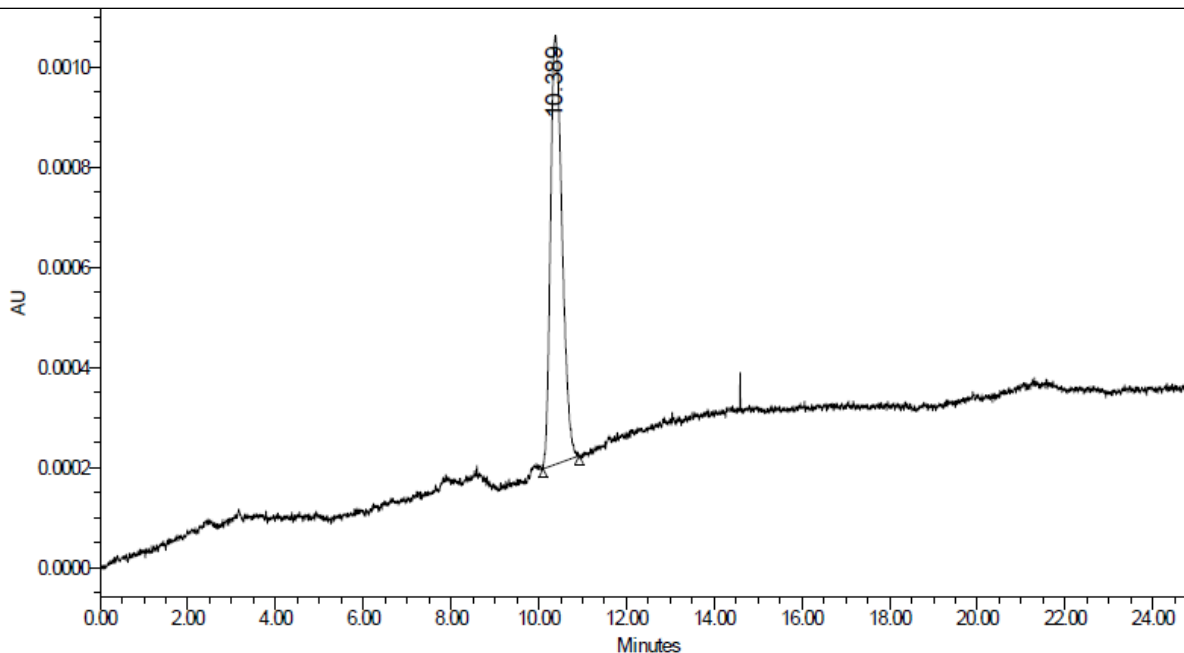

|   | RT(min) | Peak Type     | Area (μV*sec) | % Area | Height (μV) | Integration Type | Points Across Peaks | Start Time (min) | End Time (min) |
|---|---------|---------------|---------------|--------|-------------|------------------|---------------------|------------------|----------------|
| 1 | 10.389  | <b>(-)14b</b> | 15651         | 100.0  | 856         | BB               | 495                 | 10.100           | 10.925         |



## 12.6 Mixture of meso isomer and couple of atropisomers of 14c

### SAMPLE INFORMATION

Sample name: **Atropisomeri solfochloruro naftile** Acquired by: Breeze  
 Sample type: Unknown Date acquired: 12/11/2013 08:16:42 AM CEST  
 Vial: 1 Acq.Method: solfochloruro naftile  
 Injection: # Processed by: Breeze  
 Injection volume: 6.00 ul Date processed: 12/11/2013 10:14:59 AM CEST  
 Run time: 25 minutes Channel name: 2998 Ch1 254nm@1.2nm  
 Sampling rate: 12.00 per sec Channel desc: 2998 Ch1 254nm@1.2nm

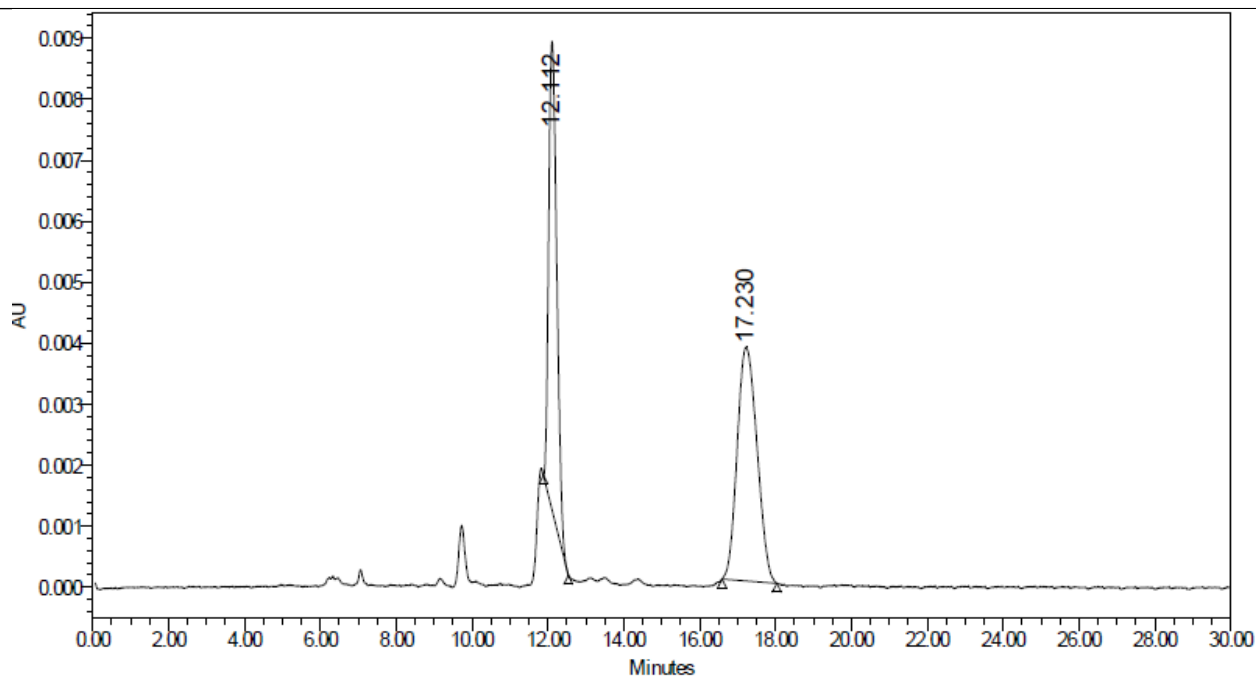

|   | RT(min) | Peak Type         | Area (μV*sec) | % Area | Height (μV) | Integration Type | Points Across Peaks | Start Time (min) | End Time (min) |
|---|---------|-------------------|---------------|--------|-------------|------------------|---------------------|------------------|----------------|
| 1 | 12.112  | <b>Forma meso</b> | 133710        | 49.01  | 7687        | BB               | 393                 | 11.883           | 12.538         |
| 2 | 17.230  | <b>RS + SR</b>    | 139105        | 50.99  | 3837        | BB               | 869                 | 16.587           | 18.035         |

## 12.7 Atropisomers of 14c

### SAMPLE INFORMATION

Sample name: **Atropisomeri solfochloruro naftile**      Acquired by: Breeze  
 Sample type: Unknown      Date acquired: 12/18/2013 14:16:44 AM CEST  
 Vial: 1      Acq.Method: solfochloruro naftile  
 Injection: #      Processed by: Breeze  
 Injection volume: 6.00 ul      Date processed: 12/18/2013 16:22:00 AM CEST  
 Run time: 25 minutes      Channel name: 2998 Ch1 254nm@1.2nm  
 Sampling rate: 6.00 per sec      Channel desc: 2998 Ch1 254nm@1.2nm

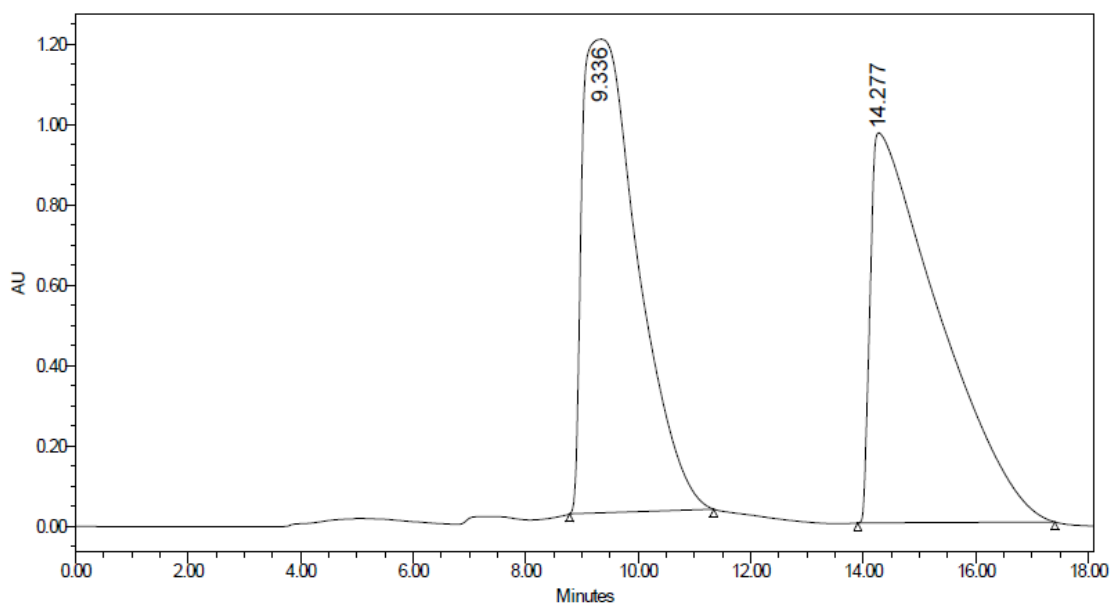

|   | RT(min) | Peak Type    | Area (μV*sec) | % Area | Height (μV) | Integration Type | Points Across Peaks | Start Time (min) | End Time (min) |
|---|---------|--------------|---------------|--------|-------------|------------------|---------------------|------------------|----------------|
| 1 | 9.336   | <b>atrop</b> | 8089847       | 49.42  | 1178        | BB               | 1536                | 8.783            | 11.343         |
| 2 | 14.277  | <b>atrop</b> | 8279335       | 50.58  | 9704        | BB               | 2102                | 13.903           | 17.407         |

## 12. 8 Atropisomer (-)14c

### SAMPLE INFORMATION

|                                                      |                                             |
|------------------------------------------------------|---------------------------------------------|
| Sample name: <b>Enantiomeri solfocloruro naftile</b> | Acquired by: Breeze                         |
| Sample type: Unknown                                 | Date acquired: 03/07/2014 15:36:40 AM CEST  |
| Vial: 1                                              | Acq.Method: solfocloruro naftile            |
| Injection: #                                         | Processed by: Breeze                        |
| Injection volume: 6.00 ul                            | Date processed: 03/07/2014 16:44:55 AM CEST |
| Run time: 25 minutes                                 | Channel name: 2998 Ch1 254nm@1.2nm          |
| Sampling rate: 6.00 per sec                          | Channel desc: 2998 Ch1 254nm@1.2nm          |

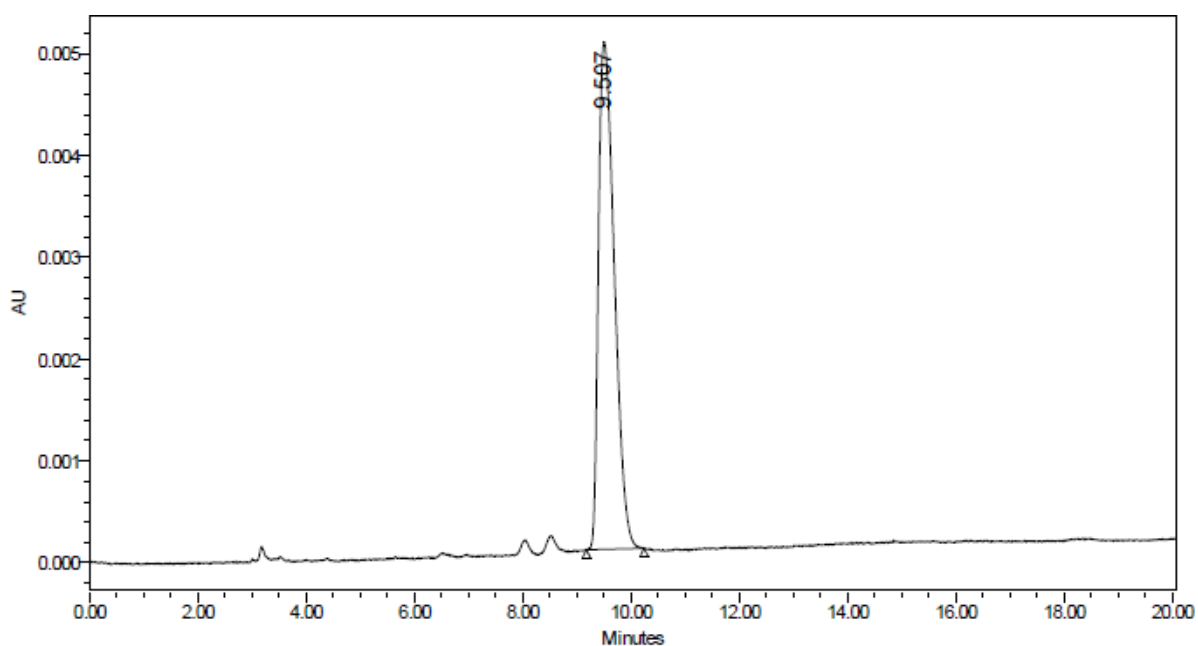

|   | RT(min) | Peak Type     | Area (μV*sec) | % Area | Height (μV) | Integration Type | Points Across Peaks | Start Time (min) | End Time (min) |
|---|---------|---------------|---------------|--------|-------------|------------------|---------------------|------------------|----------------|
| 1 | 9.507   | <b>(-)14c</b> | 101312        | 100.0  | 4986        | BB               | 639                 | 9.175            | 10.240         |

### 13. Spectral and physical data of nitriles 21.

**13.1 2-Phenyl-2-phenylaminopropanenitrile (21a).** White solid; mp 140–141 °C (EtOH; lit.<sup>15</sup> 139–140 °C). <sup>1</sup>H NMR (200 MHz, CDCl<sub>3</sub>): δ = 1.88 (s, 3H), 4.28 (br s, 1 H), 6.51 (d, *J* = 8.2 Hz, 2H), 6.72 (t, *J* = 7.4 Hz, 1H), 7.03–7.11 (m, 2H), 7.33–7.36 (m, 3H), 7.59 (d, *J* = 8.2 Hz, 2H). <sup>13</sup>C NMR (50 MHz, CDCl<sub>3</sub>): δ = 33.5, 57.3, 115.9, 120.1, 121.0, 125.1, 128.8, 129.2, 129.4, 140.1, 143.7. MS (EI) *m/z*: (%) 222 [M<sup>+</sup>](10), 195 (50), 180 (100), 77 (45). IR (CHCl<sub>3</sub>) ν (cm<sup>-1</sup>): 3419 (NH), 2254 (CN).

**13.2 2-(4-Methoxyphenylamino)-2-phenylpropanenitrile (21b).** Pale brown solid; mp 102–103 °C (EtOH; lit.<sup>16</sup> 101–102 °C). <sup>1</sup>H NMR (200 MHz, CDCl<sub>3</sub>): δ = 1.94 (s, 3H), 3.65 (s, 3H), 6.46–6.51 (m, 2H), 6.62–6.67 (m, 2H), 7.31–7.36 (m, 3H), 7.56 (m, 2H). <sup>13</sup>C NMR (50 MHz, CDCl<sub>3</sub>): δ = 33.1, 55.7, 58.4, 114.6, 118.5, 121.3, 125.3, 128.8, 129.4, 137.5, 140.4, 154.2. MS (EI) *m/z*: (%) 225 [M<sup>+</sup> - HCN](65), 210 (100). IR (CHCl<sub>3</sub>) ν (cm<sup>-1</sup>): 3425 (NH), 2251 (CN).

**13.3 2-(4-Nitrophenylamino)-2-phenylpropanenitrile (21c).** Yellow solid; mp 134–135 °C (EtOH; lit.<sup>10b</sup> 134–135 °C). <sup>1</sup>H NMR (200 MHz, CDCl<sub>3</sub>): δ = 1.95 (s, 3H), 5.21 (br s, 1H), 6.50 (d, *J* = 9.2 Hz, 2H), 7.33–7.52 (m, 5H), 7.95 (d, *J* = 9.2 Hz, 2H). <sup>13</sup>C NMR (50 MHz, CDCl<sub>3</sub>): δ = 33.1, 56.7, 115.8, 120.0, 120.7, 124.8, 126.4, 129.3, 142.9, 147.3, 148.3. MS (EI) *m/z*: (%) 240 [M<sup>+</sup> - HCN](72), 225 (100), 179 (60). IR (CHCl<sub>3</sub>) ν (cm<sup>-1</sup>): 3429 (NH), 2248 (CN).

**13.4 2-(4-Bromophenylamino)-2-phenylpropanenitrile (21d).** Brown solid; 1.10 g (yield 73 %); mp 122–123 °C (EtOH; lit.<sup>10b</sup> 122–123 °C). <sup>1</sup>H NMR (200 MHz, CDCl<sub>3</sub>): δ = 1.86 (s, 3H), 4.49 (br s, 1H), 6.36 (d, *J* = 8.4 Hz, 2H), 7.13 (d, *J* = 8.4 Hz, 2H), 7.31–7.40 (m, 3H), 7.51–7.55 (m, 2H). <sup>13</sup>C NMR δ (50 MHz, CDCl<sub>3</sub>): δ = 33.4, 57.3, 112.2, 117.5, 120.7, 125.0, 129.0, 129.6, 132.0, 139.4, 142.8. MS (EI) *m/z*: (%) 273 [M<sup>+</sup> + 2 - HCN](65), 273 [M<sup>+</sup> - HCN](65), 260 (100), 258 (100). IR (CHCl<sub>3</sub>) ν (cm<sup>-1</sup>): 3433 (NH), 2254 (CN).

**13.5 2-(4-Fluorophenylamino)-2-phenylpropanenitrile (21e).** Pale grey solid; 1.10 g (yield 92%); mp 125–126 °C (EtOH; lit.<sup>10b</sup> 125–126 °C). <sup>1</sup>H NMR (200 MHz, CDCl<sub>3</sub>): δ = 1.86 (s, 3H), 6.41–6.48 (m, 2H), 6.72–6.81 (m, 2H), 7.30–7.40 (m, 3H), 7.54–7.58 (m, 2H). <sup>13</sup>C NMR (50 MHz, CDCl<sub>3</sub>): δ = 33.3, 57.9, 115.6, 116.0, 117.6 (d, *J*<sub>2</sub> = 7.6 Hz), 120.8, 125.1, 128.9, 129.5, 139.8, 157.5 (d, *J*<sub>1</sub> = 236.5 Hz). MS (EI) *m/z*: (%) 213 [M<sup>+</sup> - HCN](65), 198 (100). IR (CHCl<sub>3</sub>) ν (cm<sup>-1</sup>): 3431 (NH), 2256 (CN).

**13.6 2-(2-Methoxyphenylamino)-2-phenylpropanenitrile (21f).** Pale brown solid; mp 80–81 °C (EtOH; lit.<sup>10b</sup> 80–81 °C). <sup>1</sup>H NMR (200 MHz, CDCl<sub>3</sub>): δ = 1.93 (s, 3H), 3.86 (s, 3H), 4.90 (br s, 1H), 6.19–6.23 (m, 1H), 6.56–6.79 (m, 3H), 7.29–7.38 (m, 3H), 7.55–7.60 (m, 2H). <sup>13</sup>C NMR (50 MHz, CDCl<sub>3</sub>): δ = 33.6, 55.7, 57.1, 109.8, 114.3, 119.4, 120.9, 125.1, 128.7, 129.4, 133.5, 140.4, 147.5. MS (EI) *m/z*: (%) 225 [M<sup>+</sup> -HCN](45), 210 (100). IR (CHCl<sub>3</sub>) ν (cm<sup>-1</sup>): 3430 (NH), 2258 (CN).

**13.7 2-(3-Methoxyphenylamino)-2-phenylpropanenitrile (21g).** Pale brown solid; 1.06 g (yield 84 %); mp 105 °C (EtOH; lit.<sup>16</sup> 102–105 °C). <sup>1</sup>H NMR (200 MHz, CDCl<sub>3</sub>): δ = 1.86 (s, 3H), 3.58 (s, 3H), 6.08–6.11 (m, 2H), 6.30–6.35 (m, 1H), 6.97 (t, *J* = 7.7 Hz, 1H), 7.28–7.35 (m, 3H), 7.57–7.61 (m, 2H). <sup>13</sup>C NMR (50 MHz, CDCl<sub>3</sub>): δ = 33.4, 55.2, 57.4, 102.0, 105.5, 108.7, 121.0, 125.0, 128.8, 129.5, 130.0, 140.3, 145.3, 160.5. MS (EI) *m/z*: (%) 225 [M<sup>+</sup> -HCN](60), 210 (100). IR (CHCl<sub>3</sub>) ν (cm<sup>-1</sup>): 3440 (NH), 2251 (CN).

**13.8 2-Phenylamino-2-(4-tolyl)propanenitrile (21h):** pale grey solid; 1.04 g (yield 88 %); mp 129–130 °C (EtOH; lit.<sup>17</sup> 126–128 °C). <sup>1</sup>H NMR (200 MHz, CDCl<sub>3</sub>): δ = 1.87 (s, 3H), 2.32 (s, 3H), 4.29 (br s, 1H), 6.53 (d, *J* = 8.4 Hz, 2H), 6.72 (t, *J* = 7.7 Hz, 1H), 7.04–7.18 (m, 4H), 7.47 (d, *J* = 8.4 Hz, 2H). <sup>13</sup>C NMR (50 MHz, CDCl<sub>3</sub>): δ = 21.3, 33.6, 57.1, 115.9, 120.0, 125.0, 128.7, 129.2, 130.1, 137.2, 138.6, 143.9. MS (EI) *m/z*: (%) 209 [M<sup>+</sup> -HCN](85), 194 (100), 77 (35). IR (CHCl<sub>3</sub>) ν (cm<sup>-1</sup>): 3428 (NH), 2242 (CN).

**13.9 2-(4-Nitrophenylamino)-2-(4-tolyl)propanenitrile (21i).** Yellow solid; 1.15 g (yield 82 %); mp 102–103 °C (EtOH; lit.<sup>10b</sup> 102–103 °C). <sup>1</sup>H NMR (200 MHz, CDCl<sub>3</sub>): δ = 1.93 (s, 3H), 2.30 (s, 3H), 3.93 (br s, 1H), 6.50 (d, *J* = 9.0 Hz, 2H), 7.16 (d, *J* = 8.0 Hz, 2H), 7.37 (d, *J* = 8.0 Hz, 2H), 7.95 (d, *J* = 9.0 Hz, 2H). <sup>13</sup>C NMR (50 MHz, CDCl<sub>3</sub>): δ = 21.2, 33.2, 56.7, 113.6, 114.5, 124.7, 125.8, 126.6, 130.4, 135.7, 139.3, 149.4. MS (EI) *m/z*: (%) 254 [M<sup>+</sup> -HCN](75), 239 (100), 193 (50). IR (CHCl<sub>3</sub>) ν (cm<sup>-1</sup>): 3421 (NH), 2255 (CN).

**13.10 2-(4-Methoxyphenylamino)-2-(4-tolyl)propanenitrile (21j).** Pale grey solid; 1.13 g (yield 85%); mp 88–89 °C (EtOH; lit.<sup>10b</sup> 88–89 °C). <sup>1</sup>H NMR (200 MHz, CDCl<sub>3</sub>): δ = 1.83 (s, 3H), 2.32 (s, 3H), 3.64 (s, 3H), 4.05 (br s, 1H), 6.50 (d, *J* = 9.0 Hz, 2H), 6.66 (d, *J* = 9.0 Hz, 2H), 7.16 (d, *J* = 8.0 Hz, 2H), 7.47 (d, *J* = 8.0 Hz, 2H). <sup>13</sup>C NMR (50 MHz, CDCl<sub>3</sub>): δ = 21.3, 33.4, 55.7, 58.1, 114.6, 115.0, 118.4, 125.2, 128.7, 129.5, 130.0, 138.6, 154.1. MS (EI) *m/z*: (%) 239 [M<sup>+</sup> -HCN](70), 225 (100). IR (CHCl<sub>3</sub>) ν (cm<sup>-1</sup>): 3438 (NH), 2241 (CN).

**13.11 2-(4-Methoxyphenylamino)-2-(4-nitrophenyl)propanenitrile (21k).** Pale yellow solid; 1.25 g (yield 84 %); mp 109–111 °C (EtOH; lit.<sup>16</sup> 107–109 °C). <sup>1</sup>H NMR (200 MHz, CDCl<sub>3</sub>): δ = 1.86 (s, 3H), 3.63 (s, 3H), 4.24 (br s, 1H), 6.43 (d, *J* = 8.4 Hz, 2H), 6.64 (d, *J* = 8.4 Hz, 2H), 7.77 (d, *J* = 8.4 Hz, 2H), 8.19 (d, *J* = 8.4 Hz, 2H). <sup>13</sup>C NMR (50 MHz, CDCl<sub>3</sub>): δ = 32.8, 55.7, 57.9, 114.8, 118.3, 120.3, 124.7, 126.6, 136.7, 147.6, 148.2, 154.5. MS (EI) *m/z*: (%) 270 [M<sup>+</sup> -HCN](100), 255 (100), 209 (40). IR (CHCl<sub>3</sub>) ν (cm<sup>-1</sup>): 3424 (NH), 2251 (CN).

**13.12 2-Phenyl-2-phenylaminoacetonitrile (21m).** White solid; mp 79 °C (EtOH; lit.<sup>18</sup> 76–78 °C). <sup>1</sup>H NMR (200 MHz, CDCl<sub>3</sub>): δ = 4.09 (br s, 1H), 5.37 (s, 1H), 6.72–6.75 (m, 2H), 6.88 (t, *J* = 7.7 Hz, 1H), 7.21–7.29 (m, 2H), 7.34–7.41 (m, 3H), 7.54–7.56 (m, 2H). <sup>13</sup>C NMR (50 MHz, CDCl<sub>3</sub>): δ = 50.3, 114.4, 118.6, 120.4, 127.5, 129.6, 129.7, 129.8, 134.2, 145.0. MS (EI) *m/z*: (%) 208 [M<sup>+</sup>] (15), 181 (90), 180 (100), 116 (15), 77 (20). IR (CHCl<sub>3</sub>) ν (cm<sup>-1</sup>): 3415 (NH), 2240 (CN).

**13.13 2-(4-Nitrophenyl)-2-phenylaminoacetonitrile (21n).** Pale brown waxy solid. <sup>1</sup>H NMR (200 MHz, CDCl<sub>3</sub>): δ = 4.18 (br s, 1H), 5.53 (s, 1H), 6.71 (d, *J* = 8.1 Hz, 2H), 6.85–6.92 (m, 1H), 7.20–7.26 (m, 2H), 7.77 (d, *J* = 8.0 Hz, 2H), 8.25 (d, *J* = 8.0 Hz, 2H). <sup>13</sup>C NMR (50 MHz, CDCl<sub>3</sub>): δ = 49.9, 114.7, 117.6, 127.3, 128.4, 129.6, 129.8, 130.7, 141.1, 144.3. MS (EI) *m/z*: (%) 253 [M<sup>+</sup>] (10), 226 (90), 225 (100), 77(20). IR (CHCl<sub>3</sub>) ν (cm<sup>-1</sup>): 3419 (NH), 2238 (CN).

**13.14 2-Phenylamino-2-(4-tolyl)acetonitrile (21o).** White solid; mp 77–78 °C (EtOH; lit.<sup>20</sup> 76–78 °C). <sup>1</sup>H NMR (200 MHz, CDCl<sub>3</sub>): δ = 2.36 (s, 3H), 4.09 (br s, 1H), 5.33 (s, 1H), 6.73 (d, *J* = 8.0 Hz, 2H), 6.86 (t, *J* = 7.6 Hz, 1H), 7.20–7.28 (m, 4H), 7.44 (d, *J* = 8.0 Hz, 2H). <sup>13</sup>C NMR (50 MHz, CDCl<sub>3</sub>): δ = 21.1, 50.1, 114.4, 118.7, 120.4, 127.4, 129.4, 130.2, 131.2, 139.8, 145.0. MS (EI) *m/z*: (%) 222 [M<sup>+</sup>] (10), 195 (85), 194 (100), 77 (20). IR (CHCl<sub>3</sub>) ν (cm<sup>-1</sup>): 3416 (NH), 2231 (CN).

**13.15 2-Phenylamino-2-(2-thienyl)acetonitrile (21p).** Pale yellow solid; mp 101–102 °C (EtOH; lit.<sup>21</sup> 100–102 °C). <sup>1</sup>H NMR (200 MHz, CDCl<sub>3</sub>): δ = 4.08 (br s, 1H), 5.59 (s, 1H), 6.73–6.77 (m, 2H), 6.84–6.92 (m, 1H), 6.97–7.02 (m, 1H), 7.20–7.34 (m, 4H). <sup>13</sup>C NMR (50 MHz, CDCl<sub>3</sub>): δ = 46.4, 114.9, 117.7, 121.0, 127.3, 127.4, 127.5, 129.8, 136.9, 144.2. MS (EI) *m/z*: (%) 214 [M<sup>+</sup>] (5), 187 (90), 186 (100), 77 (10). IR (CHCl<sub>3</sub>) ν (cm<sup>-1</sup>): 3411 (NH), 2232 (CN).

## 14. $^1\text{H}$ and $^{13}\text{C}$ NMR spectra of nitriles 21

### 14.1 2-Phenyl-2-phenylaminopropanenitrile (21a).

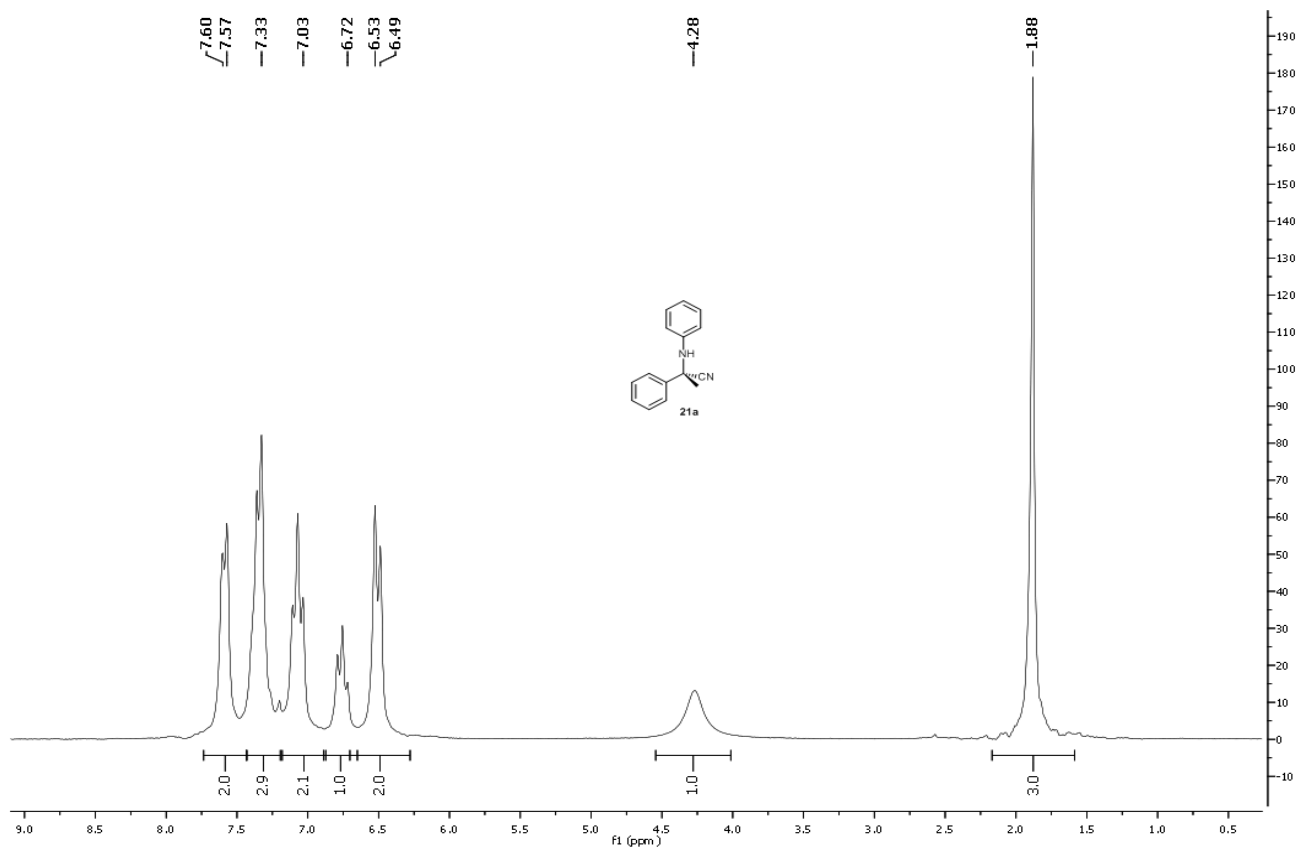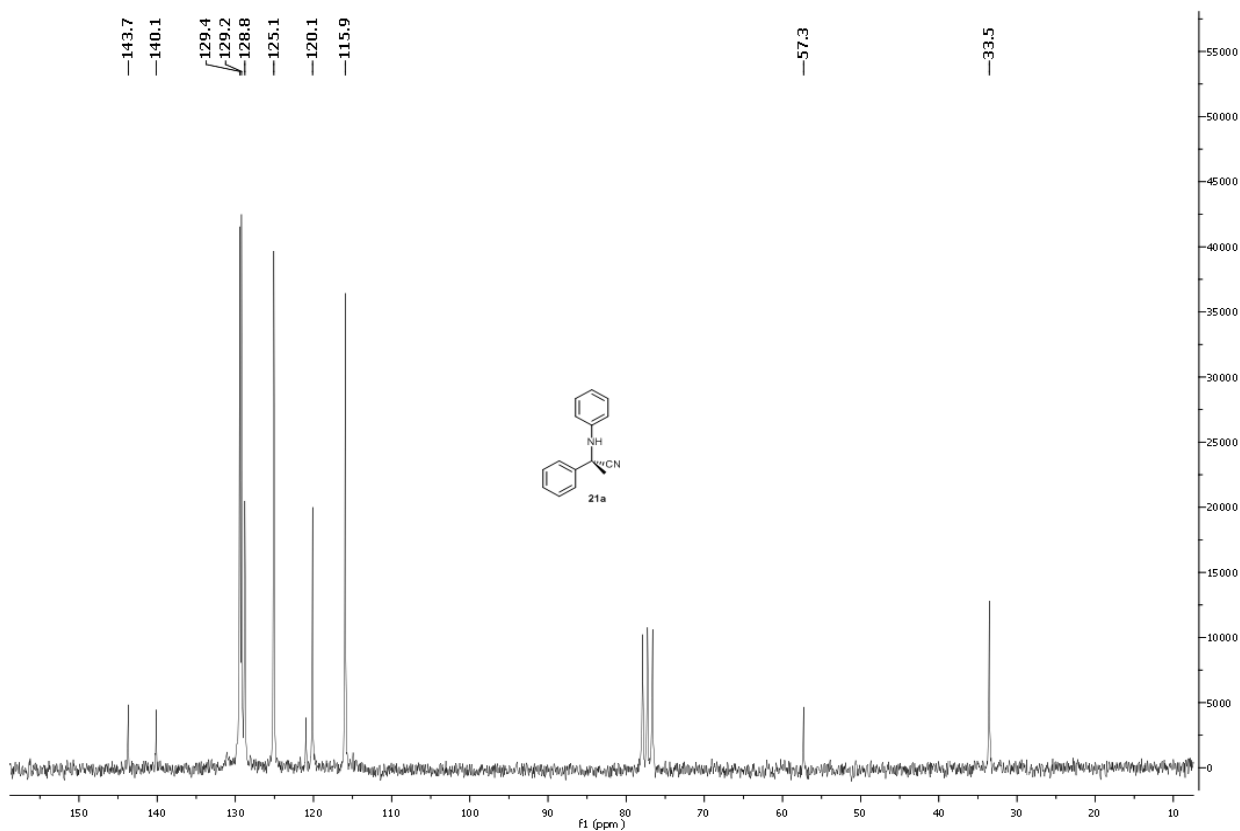

14.2 2-(4-Methoxyphenylamino)-2-phenylpropanenitrile (21b).

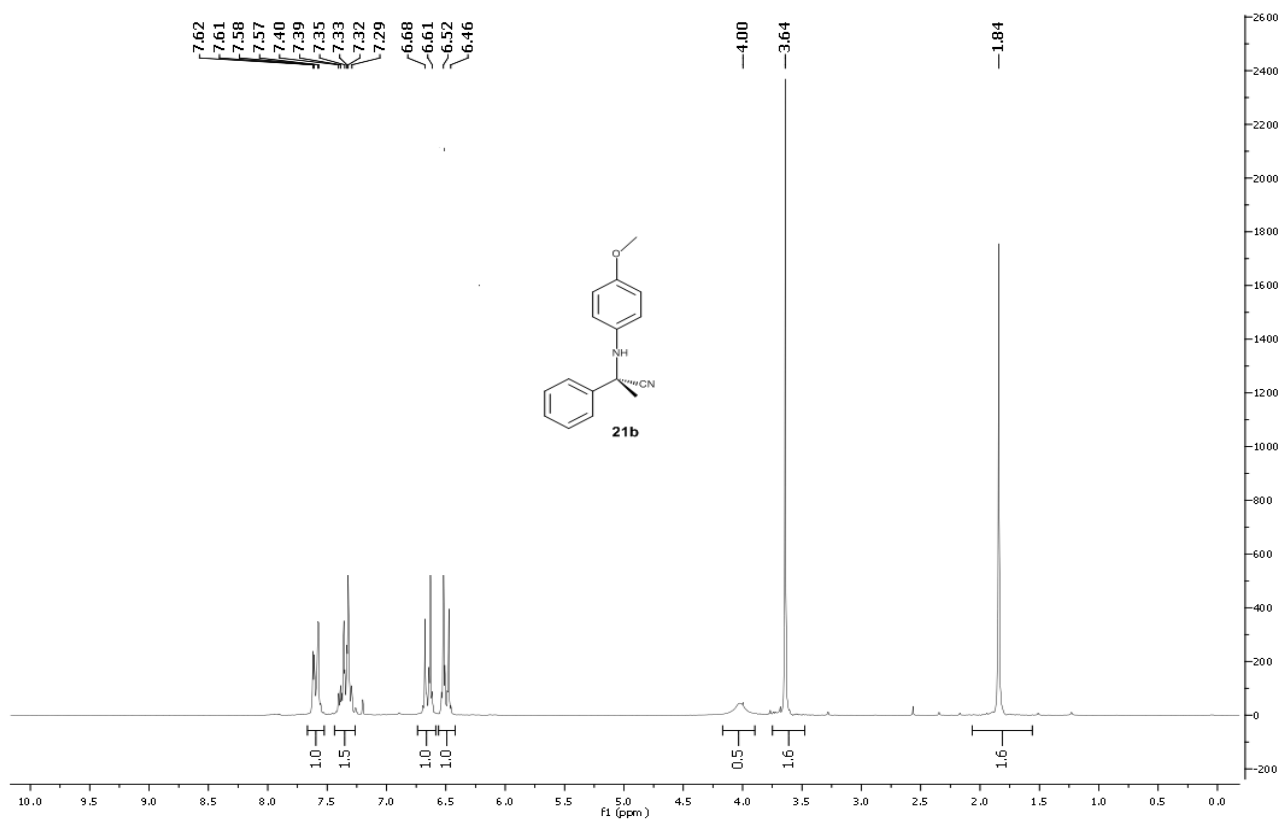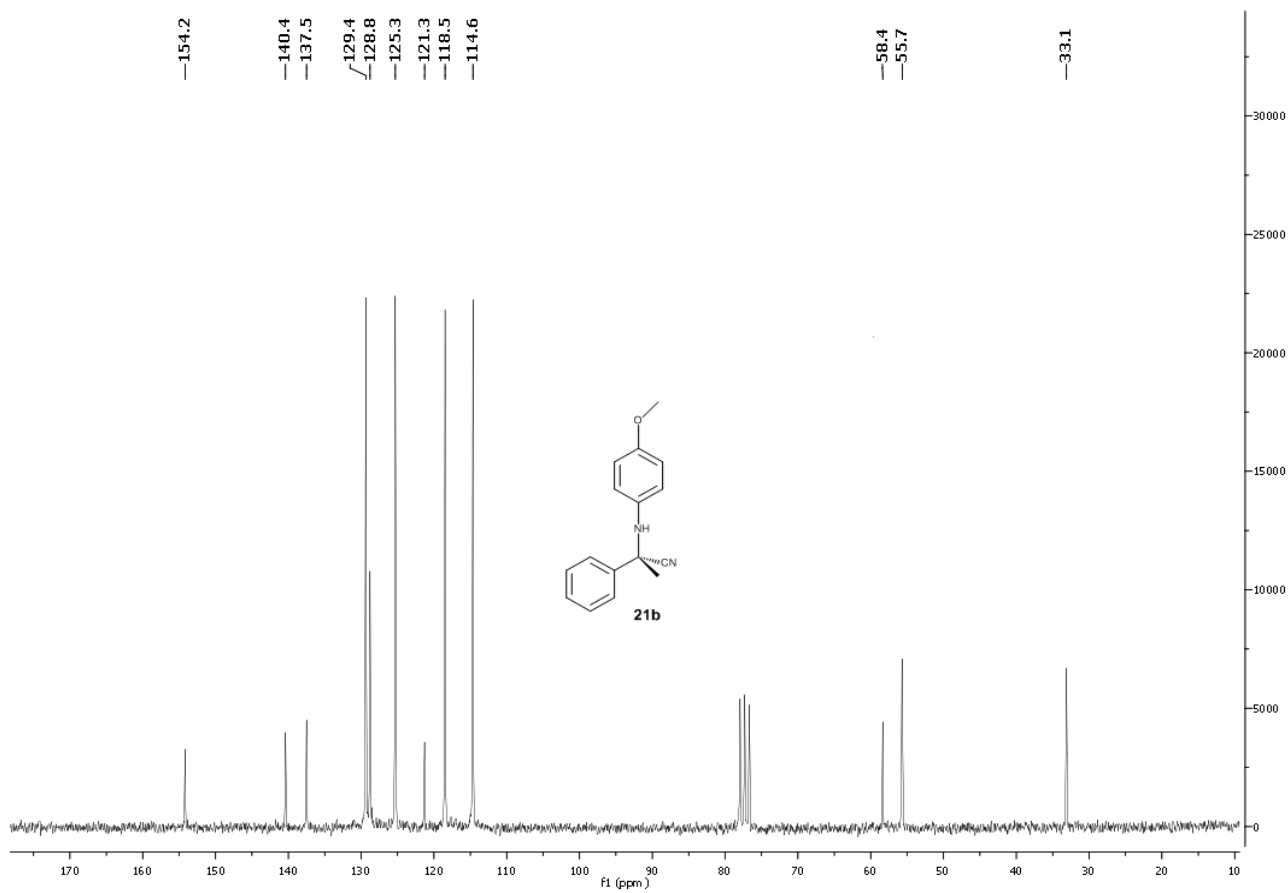



### 14.3 2-(4-Nitrophenylamino)-2-phenylpropanenitrile (21c).

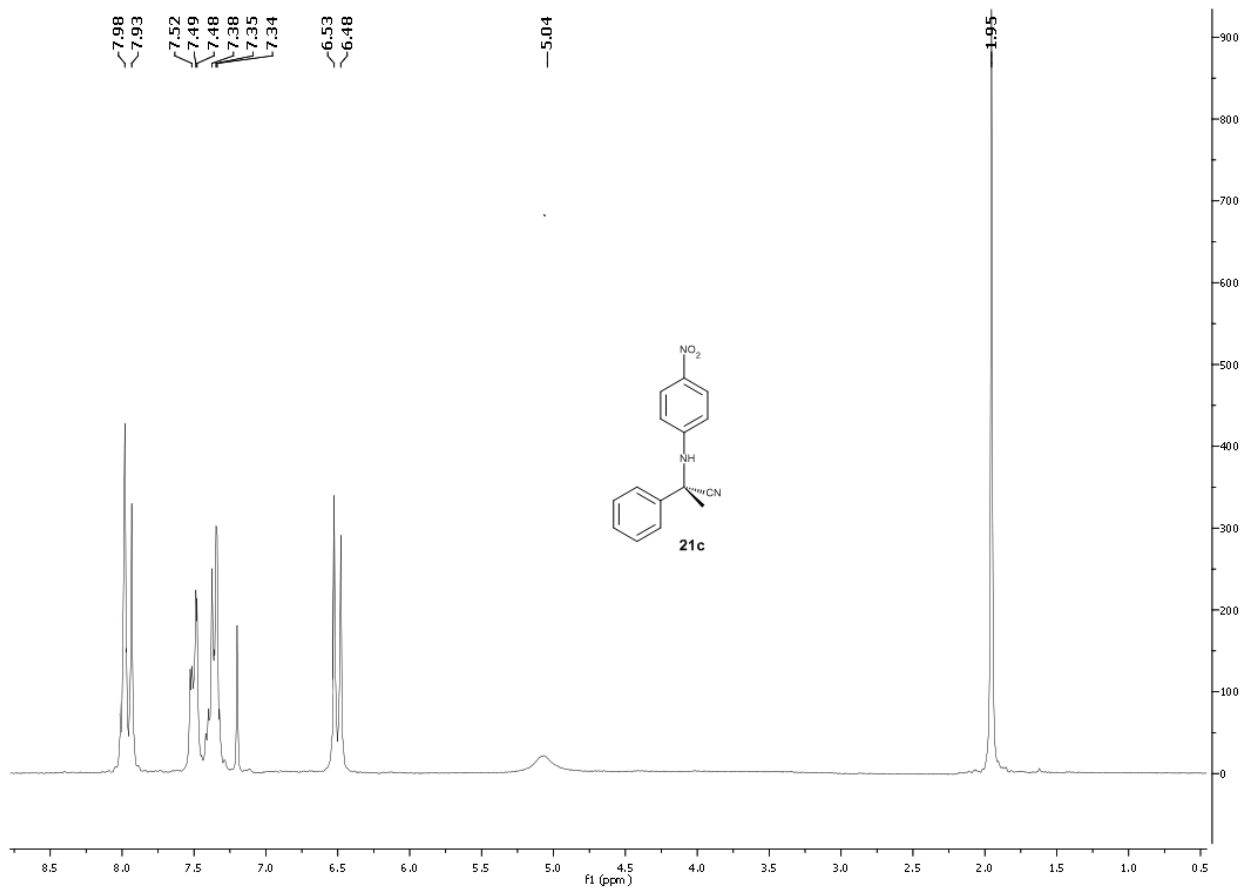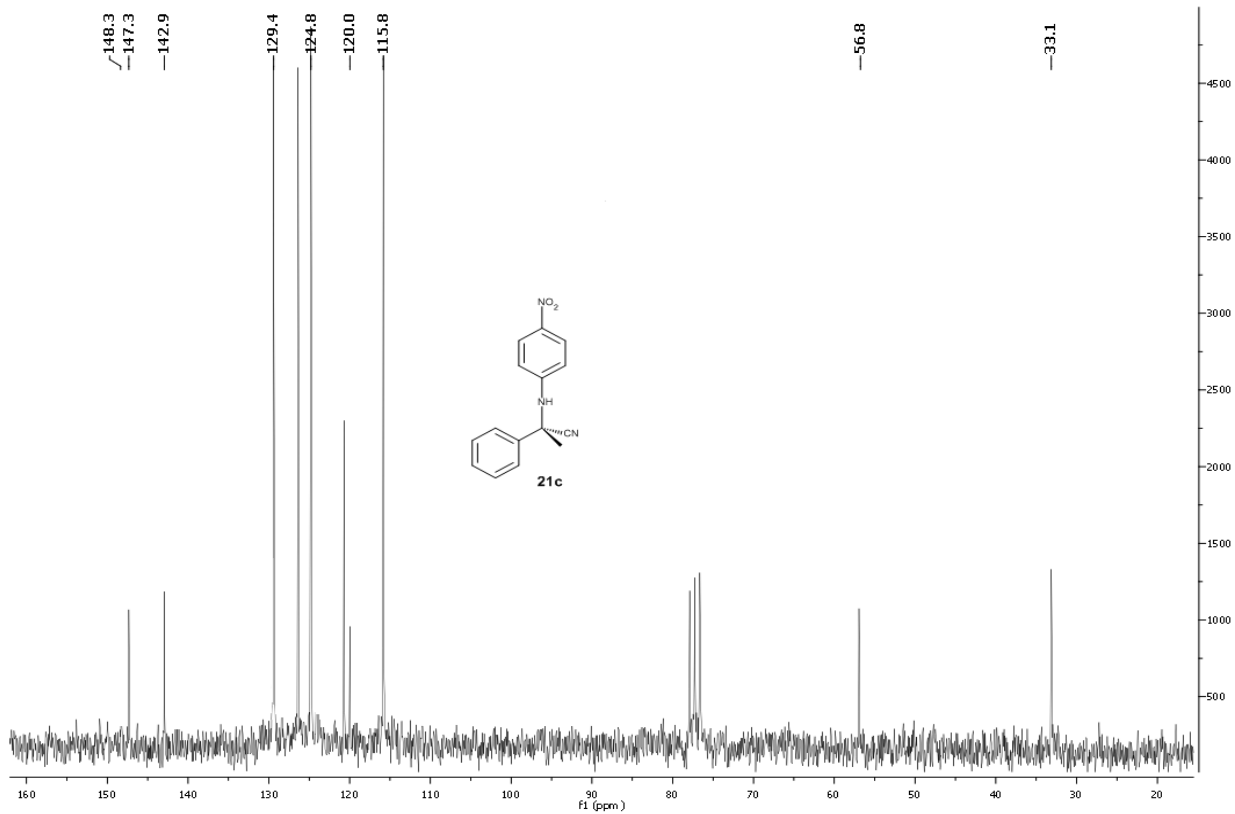

### 14.4 2-(4-Bromophenylamino)-2-phenylpropanenitrile (21d).

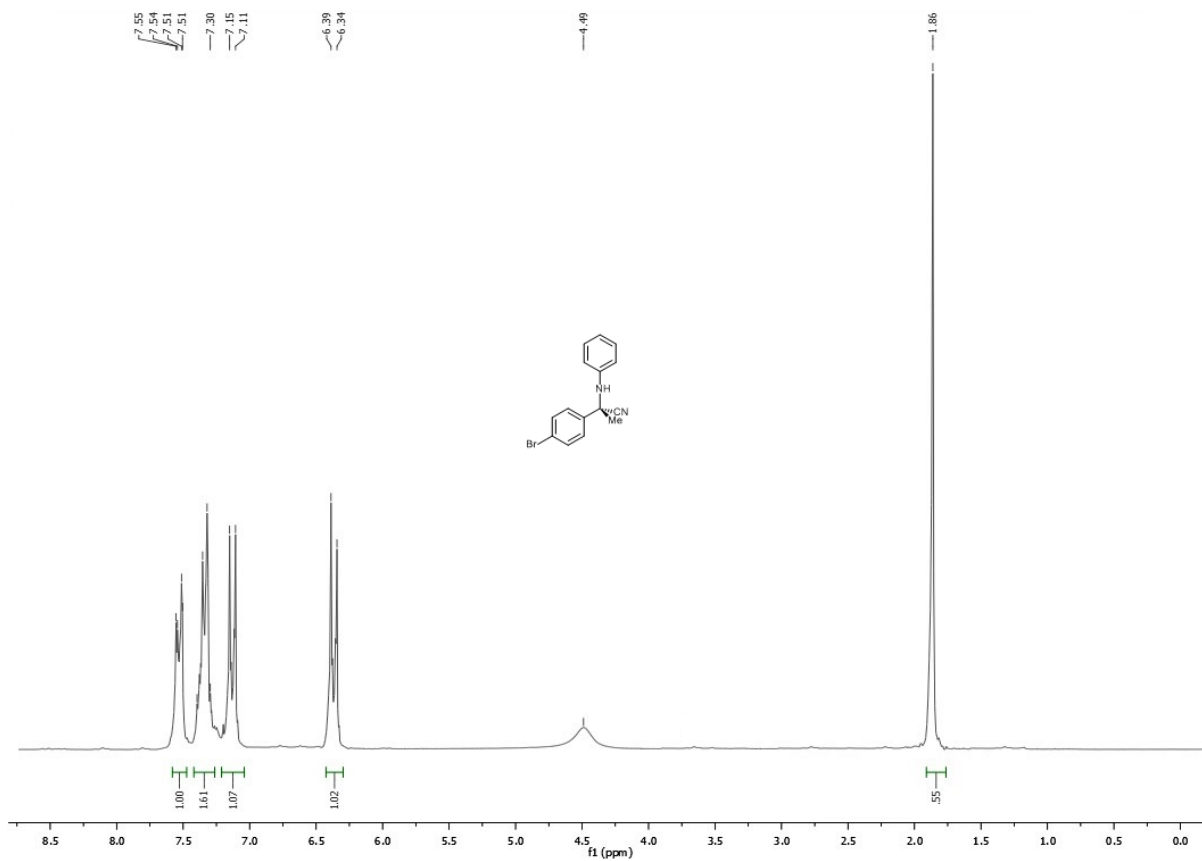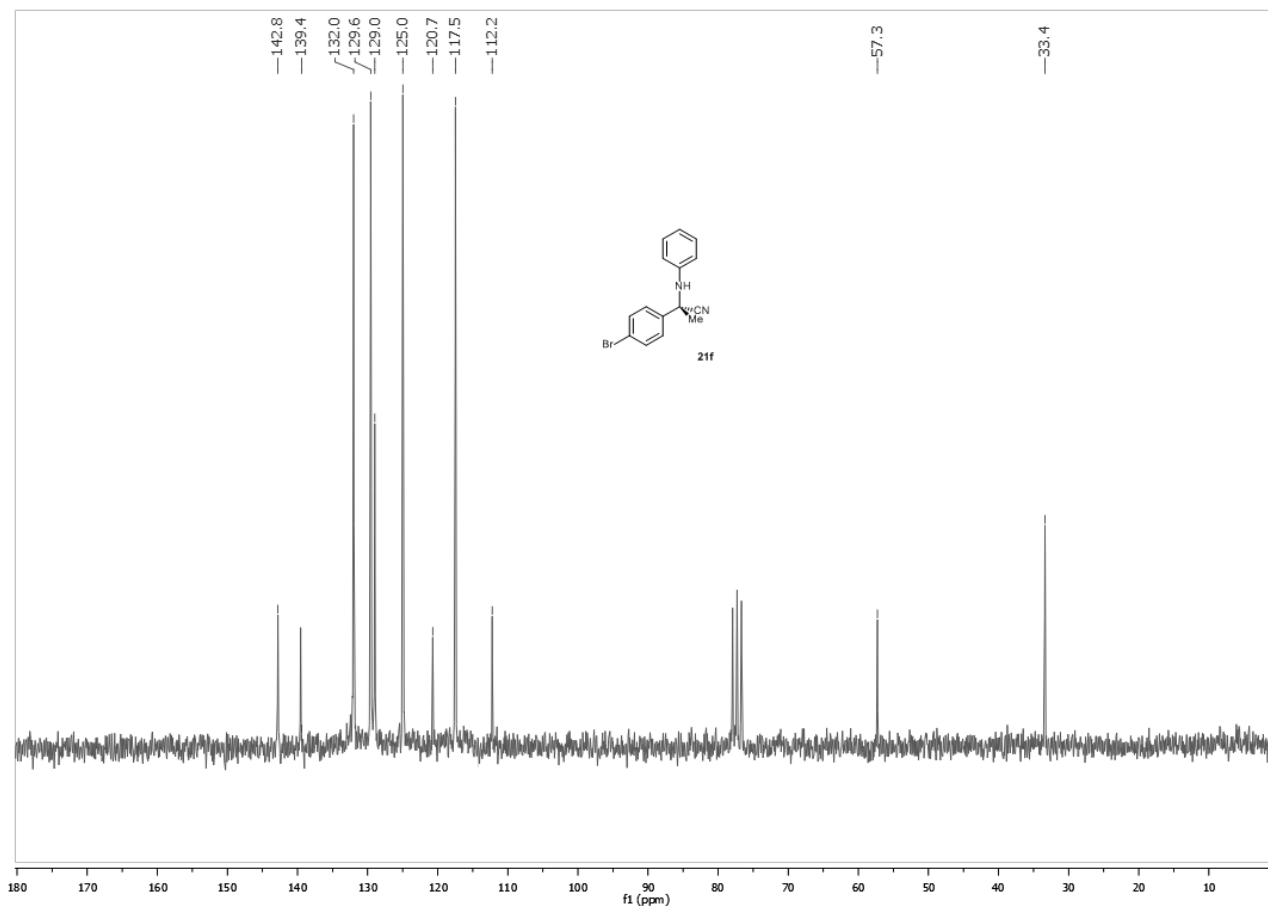

### 14.5 2-(4-Fluorophenylamino)-2-phenylpropanenitrile (21e).

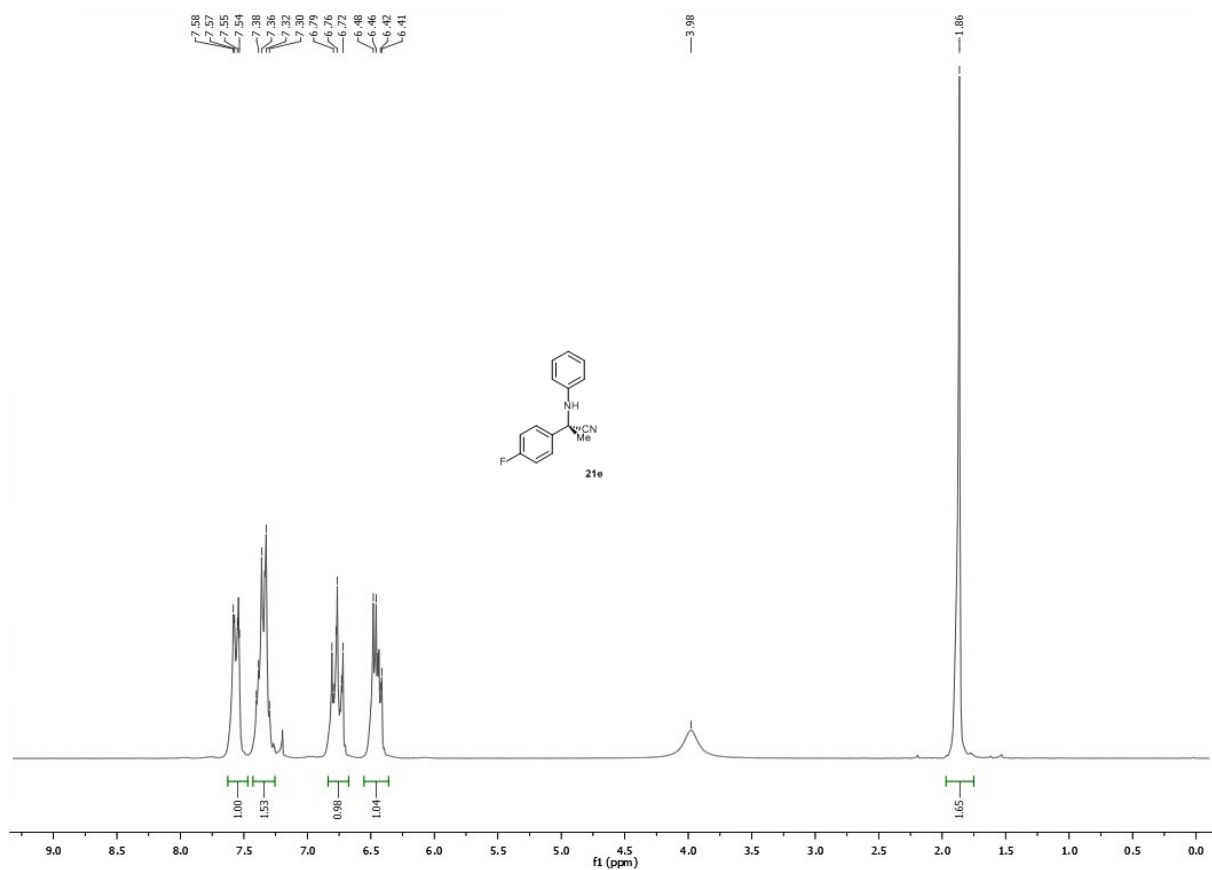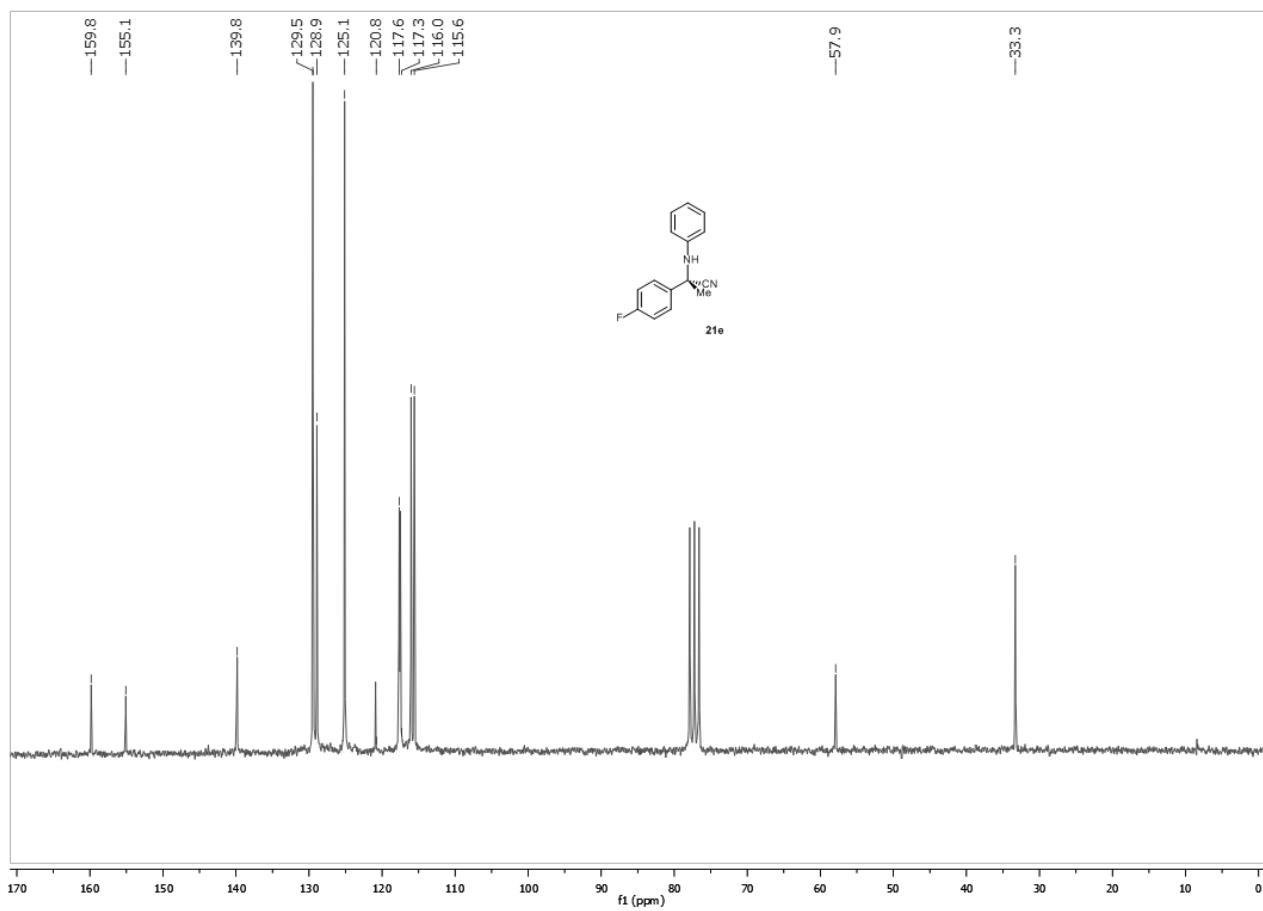

# 14.6 2-(2-Methoxyphenylamino)-2-phenylpropanenitrile (21f).

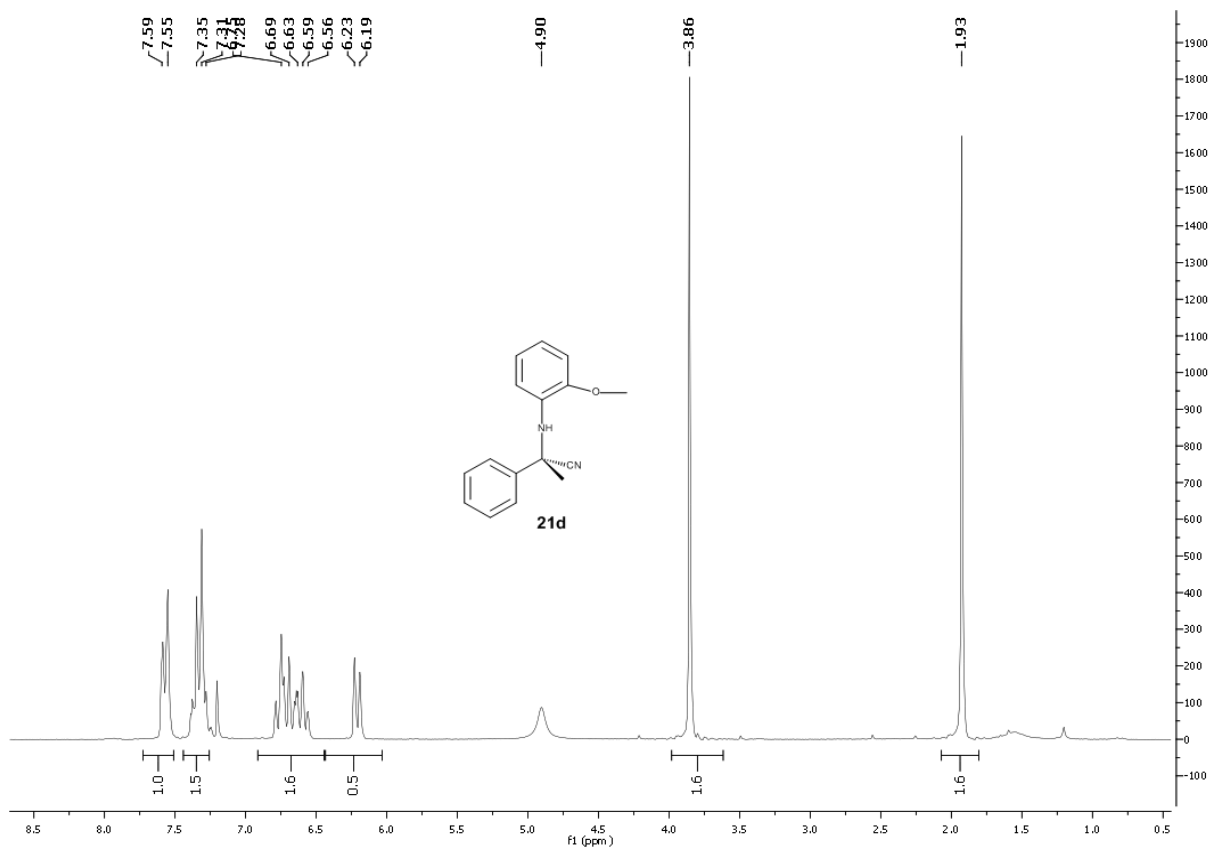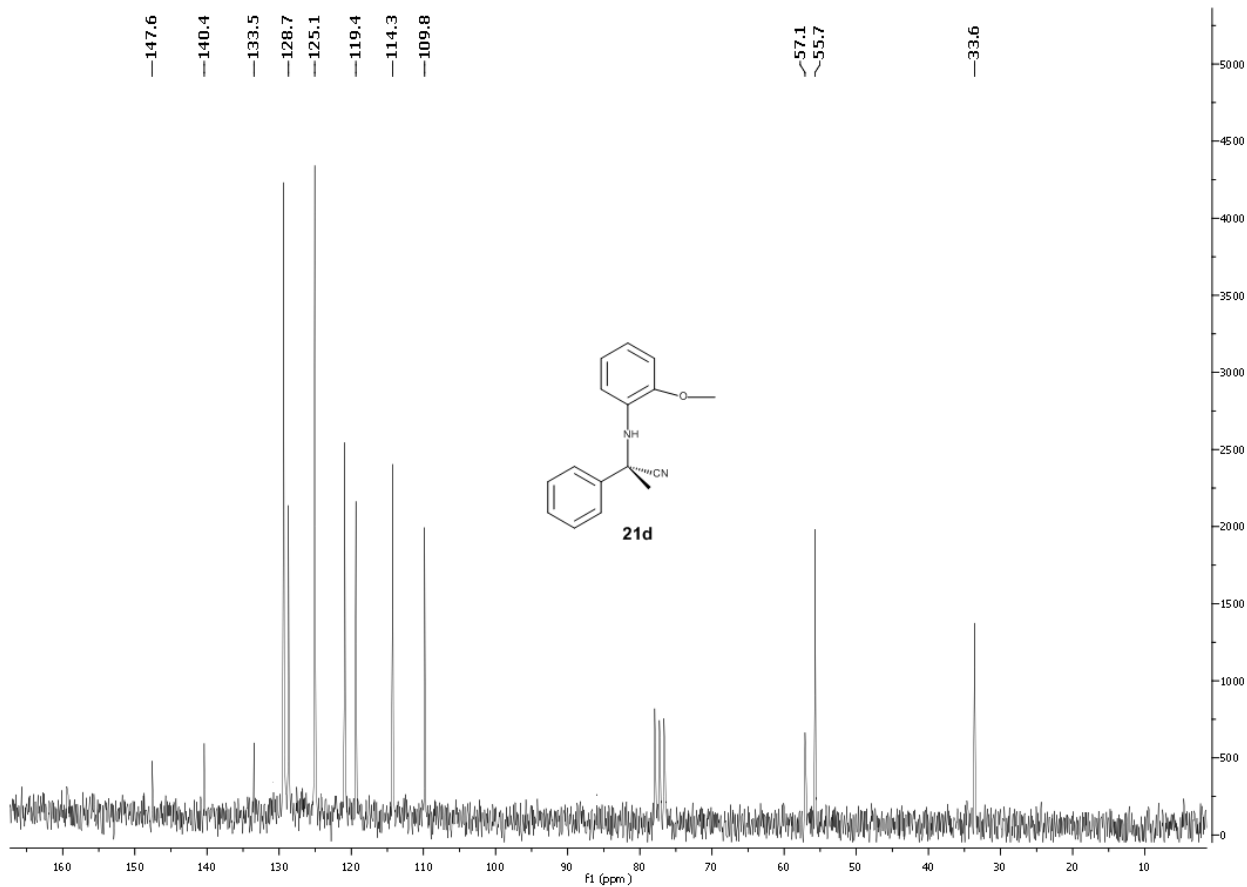

### 14.7 2-(3-Methoxyphenylamino)-2-phenylpropanenitrile (21g)

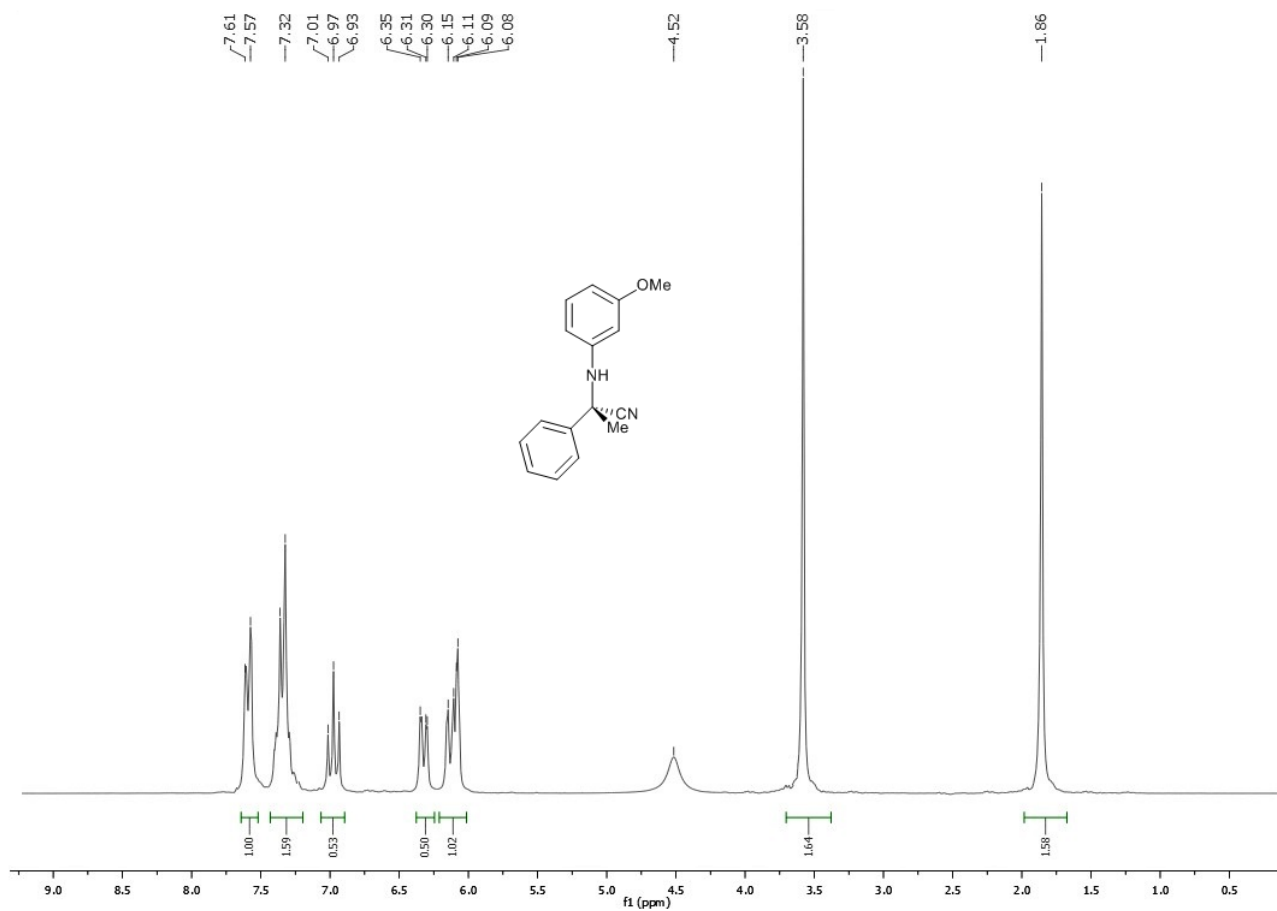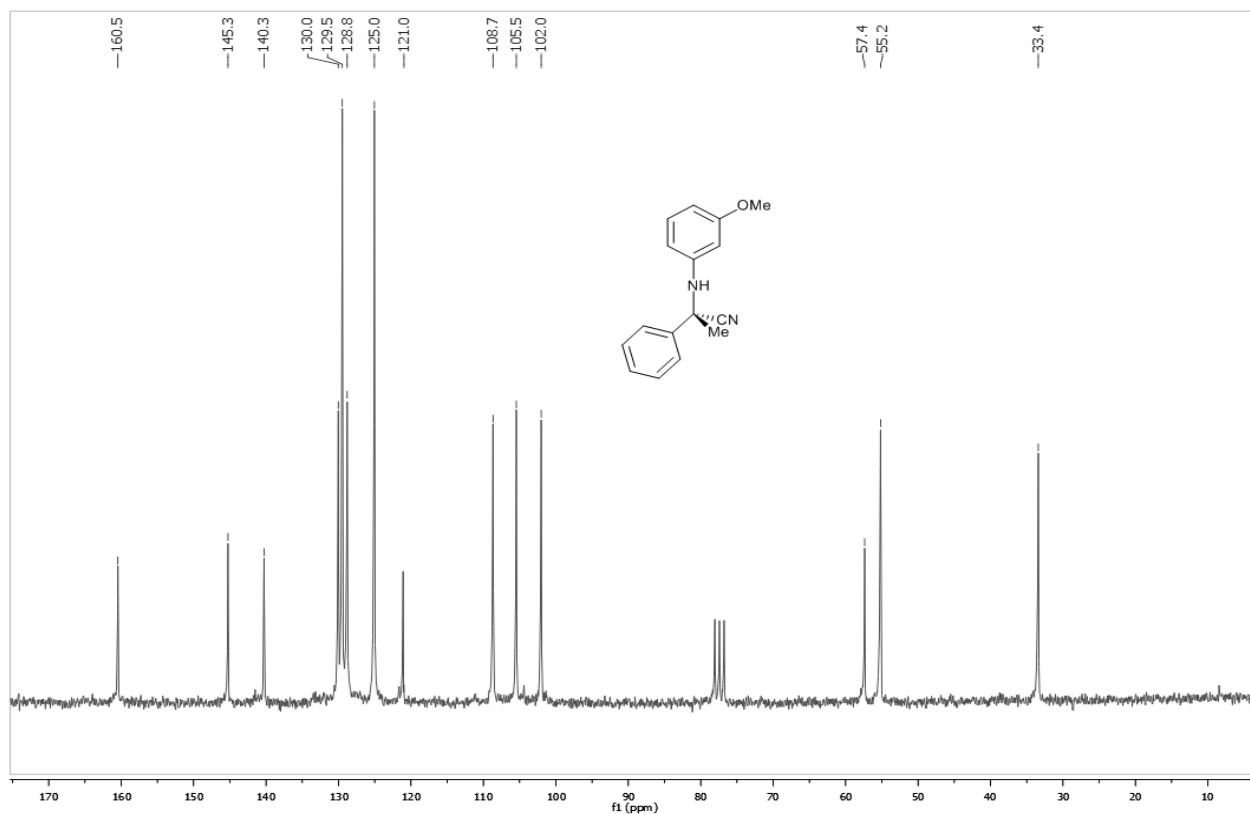

### 14.8 2-Phenylamino-2-(4-tolyl)propanenitrile (21h)

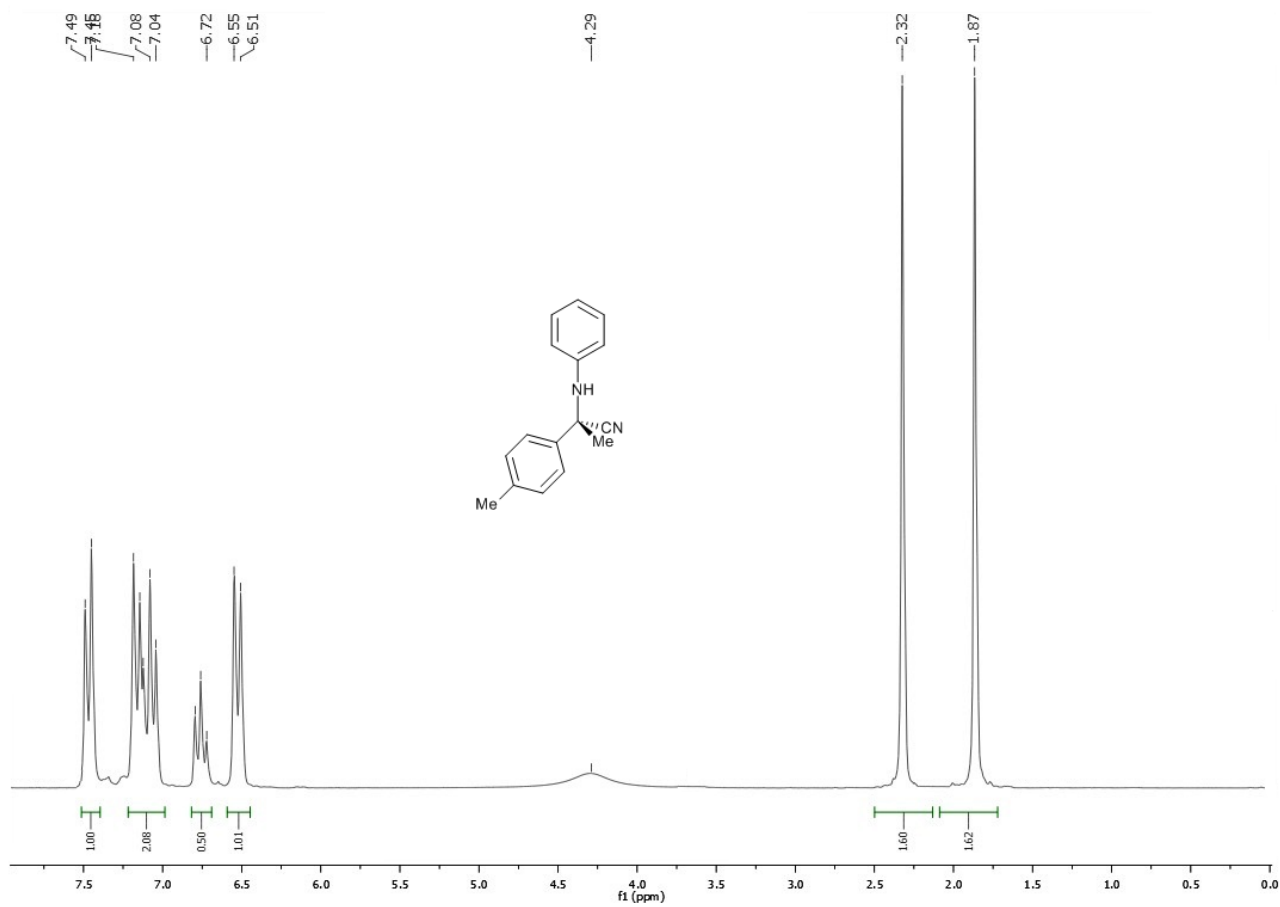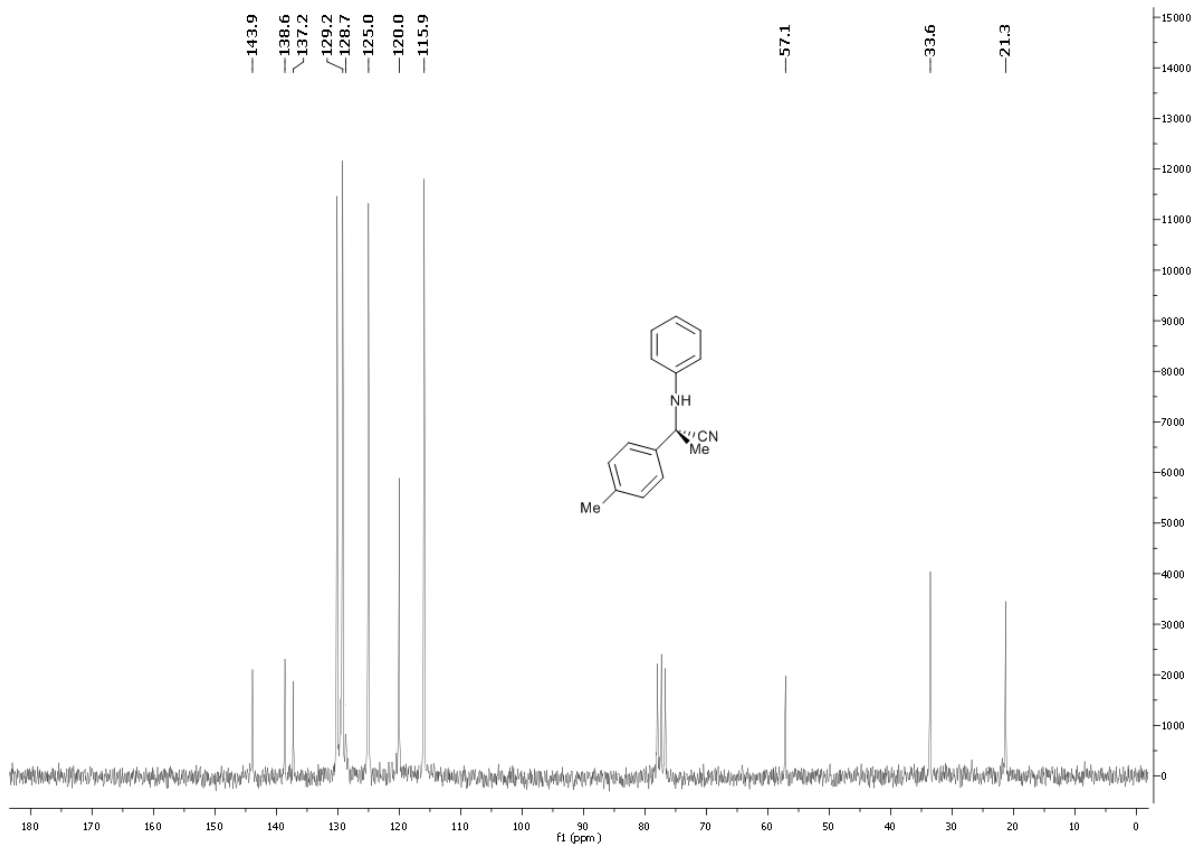

### 14.9 2-(4-Nitrophenylamino)-2-(4-tolyl)propanenitrile (21i)

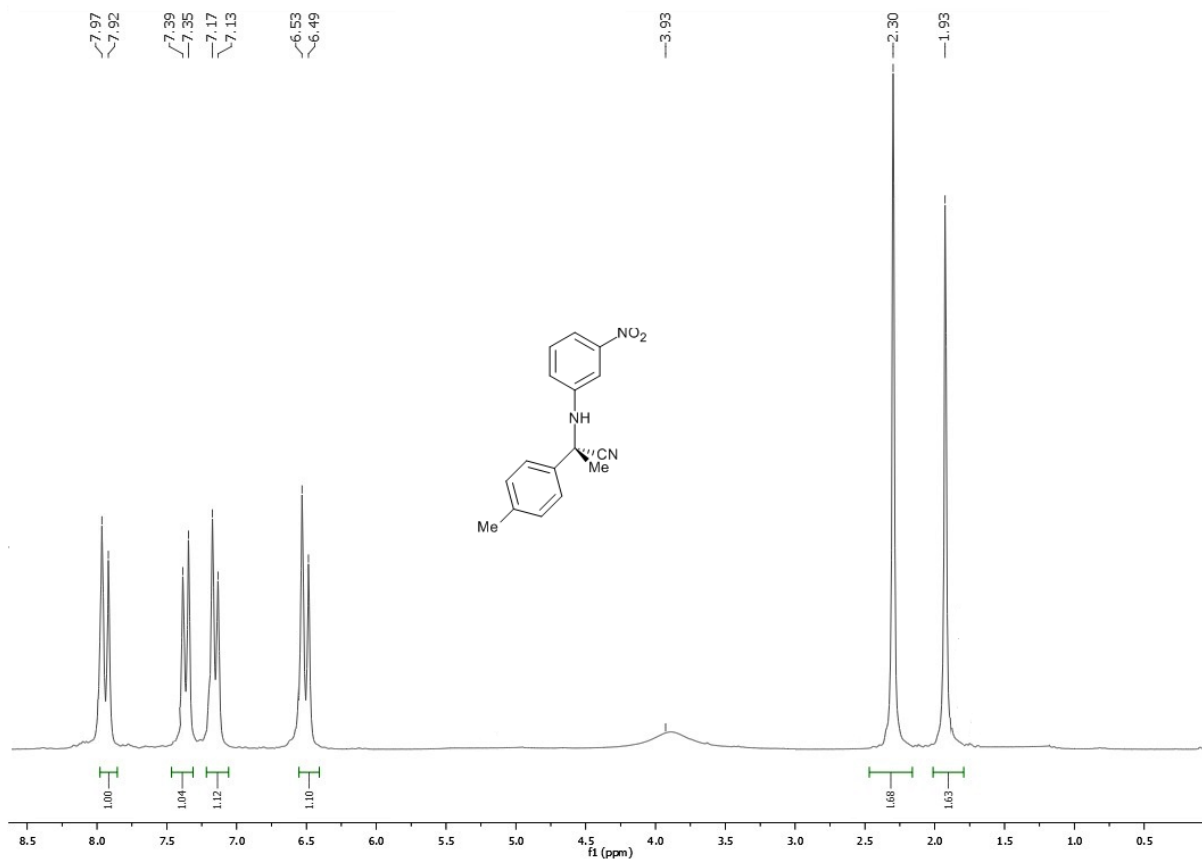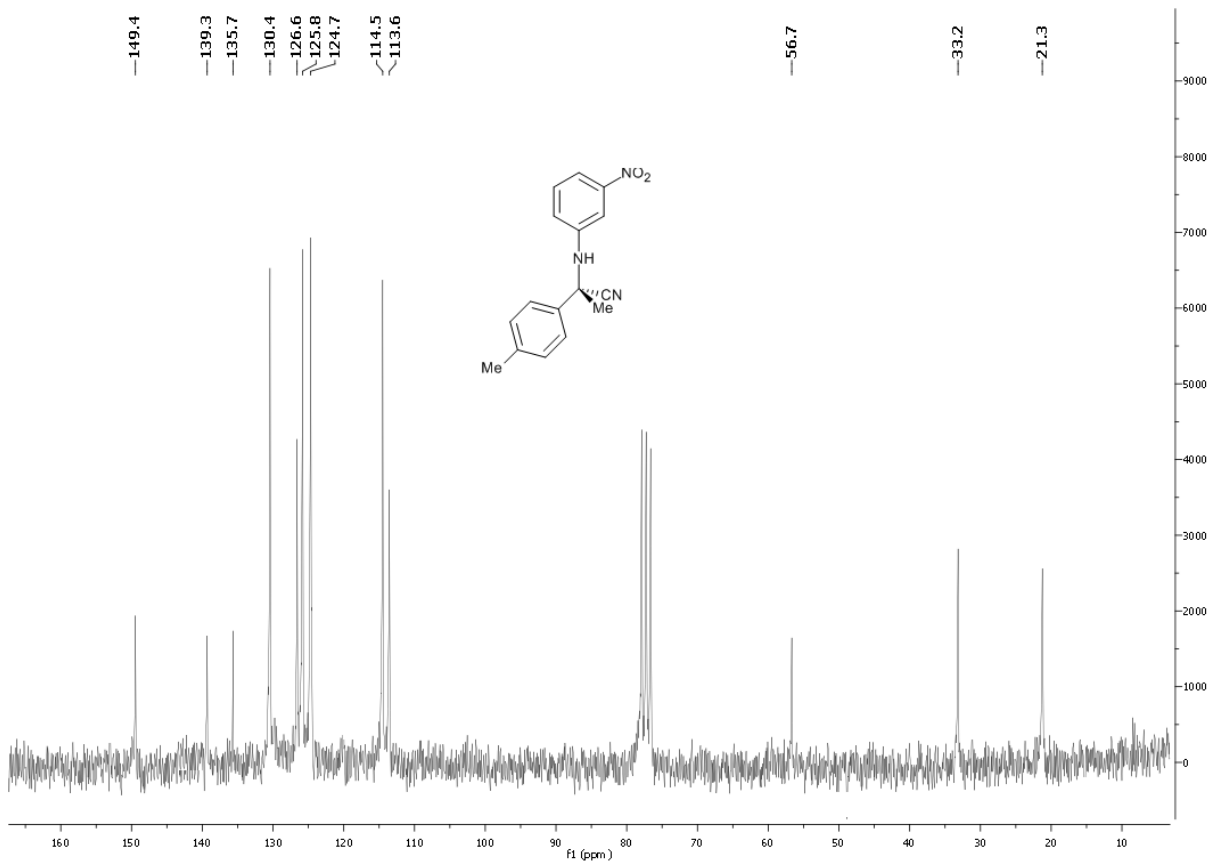

### 14.10 2-(4-Methoxyphenylamino)-2-(4-tolyl)propanenitrile (21j)

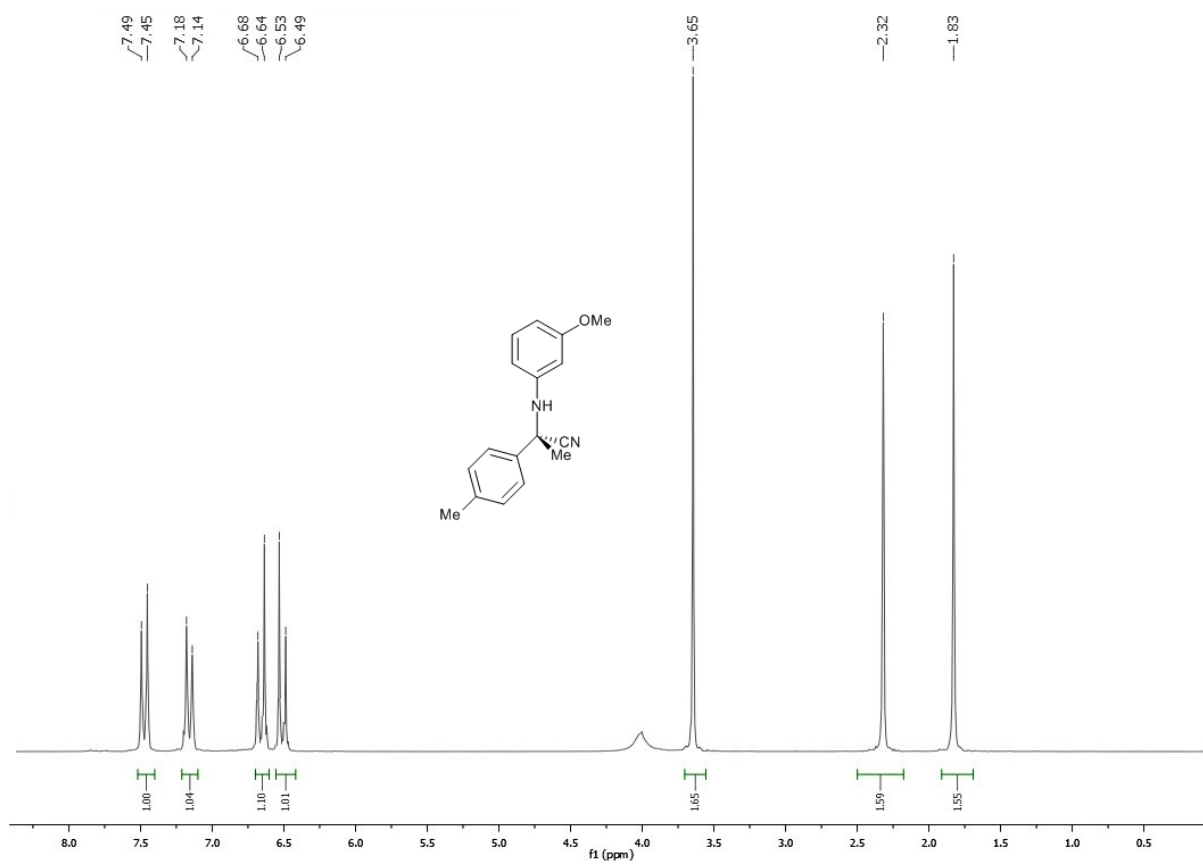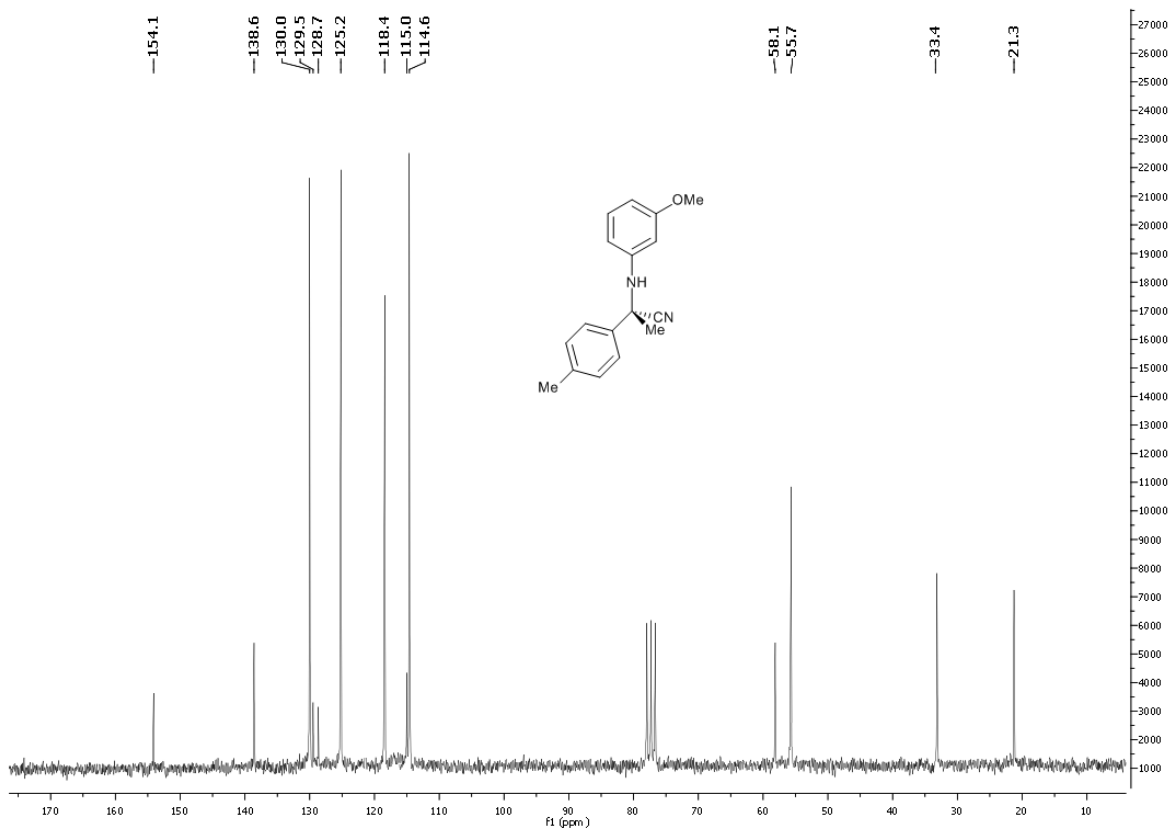



### 14.11 2-(4-Methoxyphenylamino)-2-(4-Nitrophenyl)propanenitrile (21k)

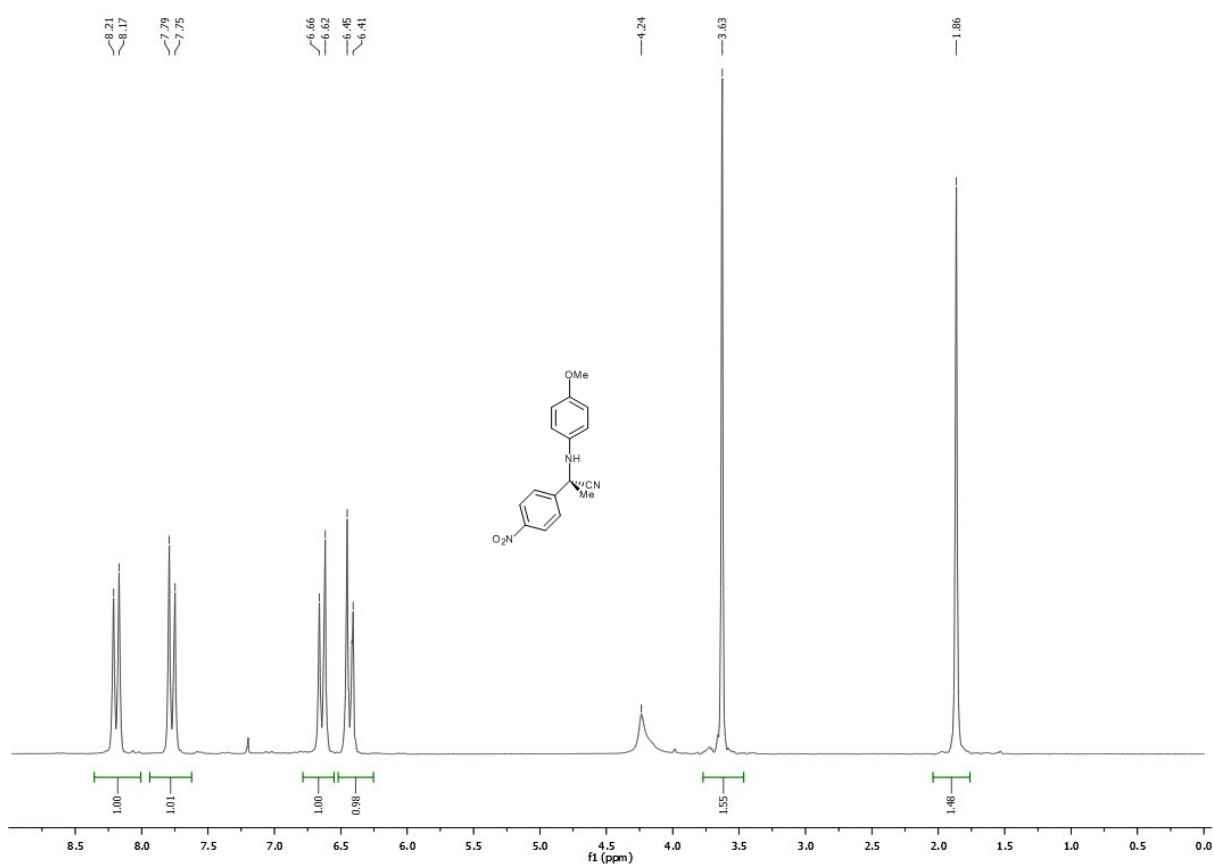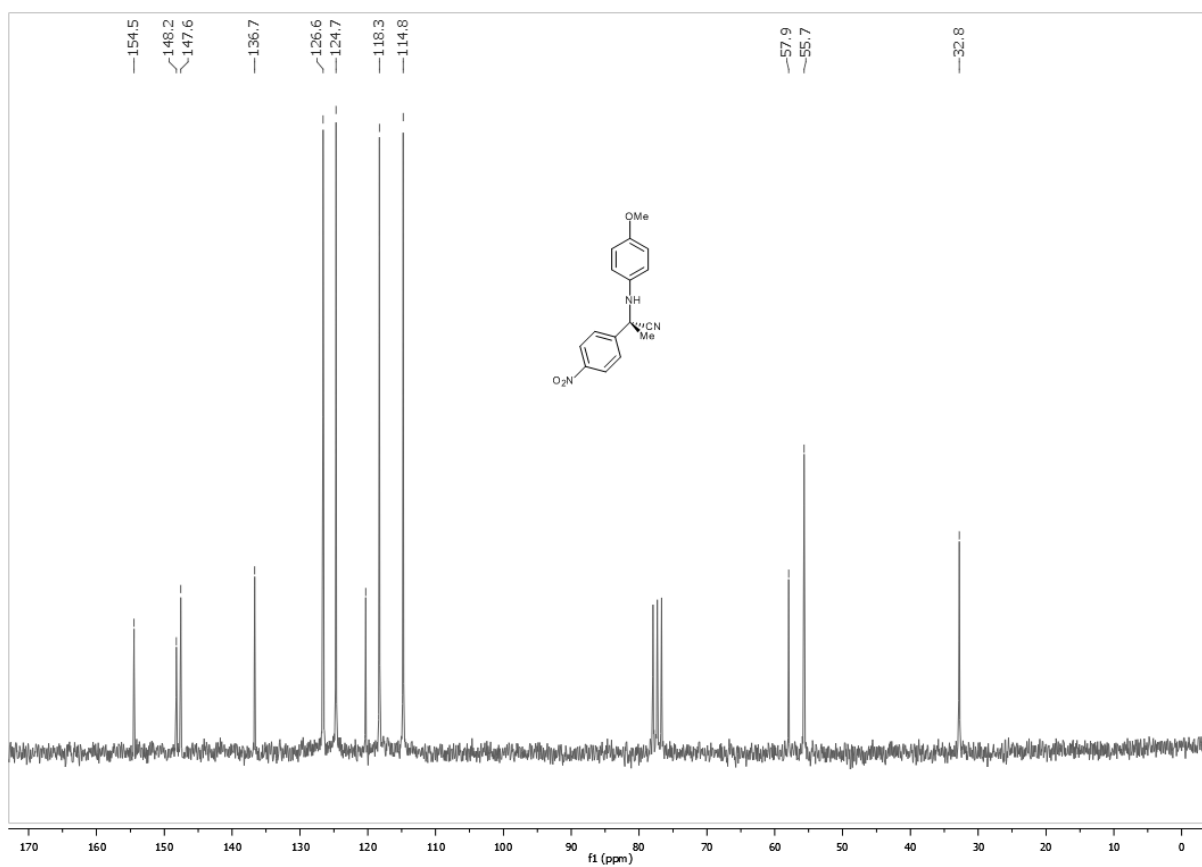

# 14.12 2-Methyl-2-phenylaminopentanenitrile (21I)

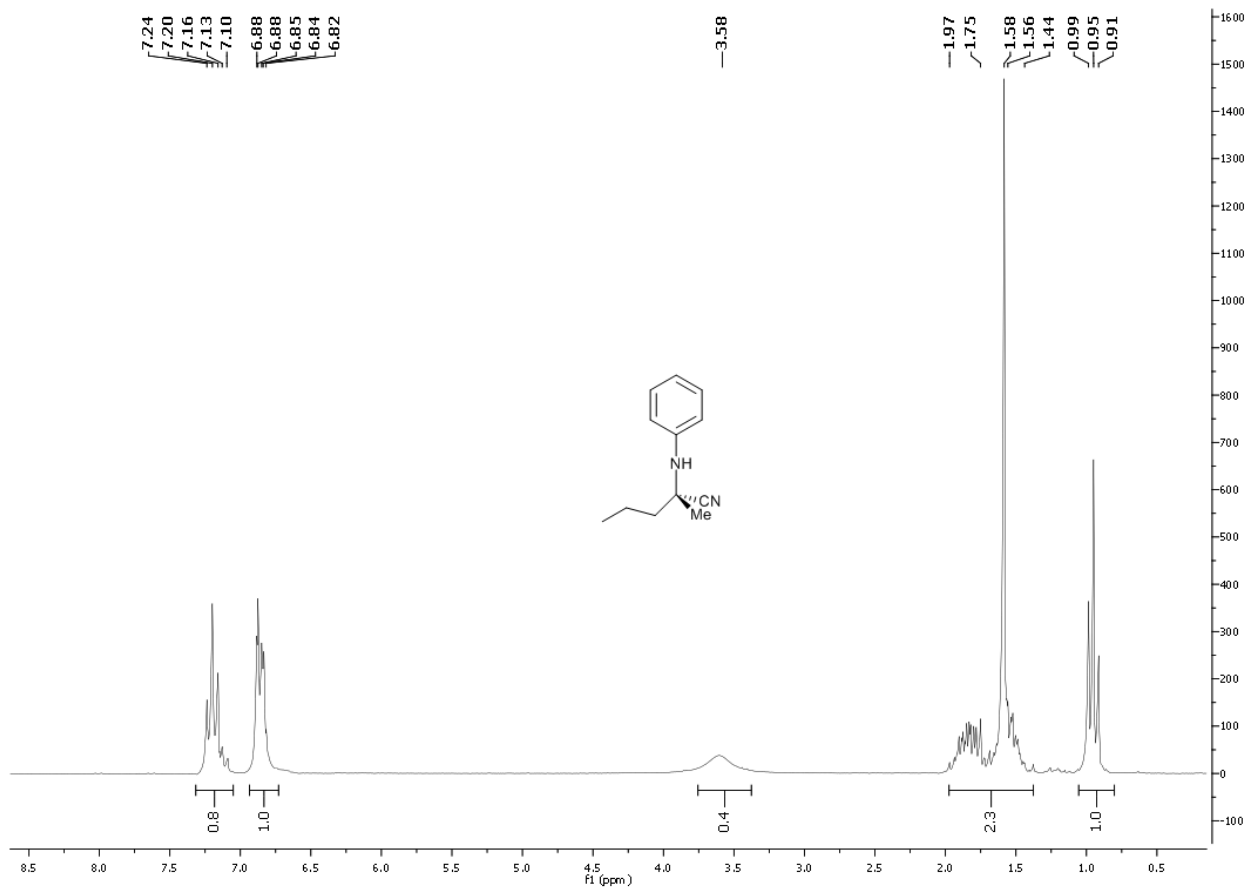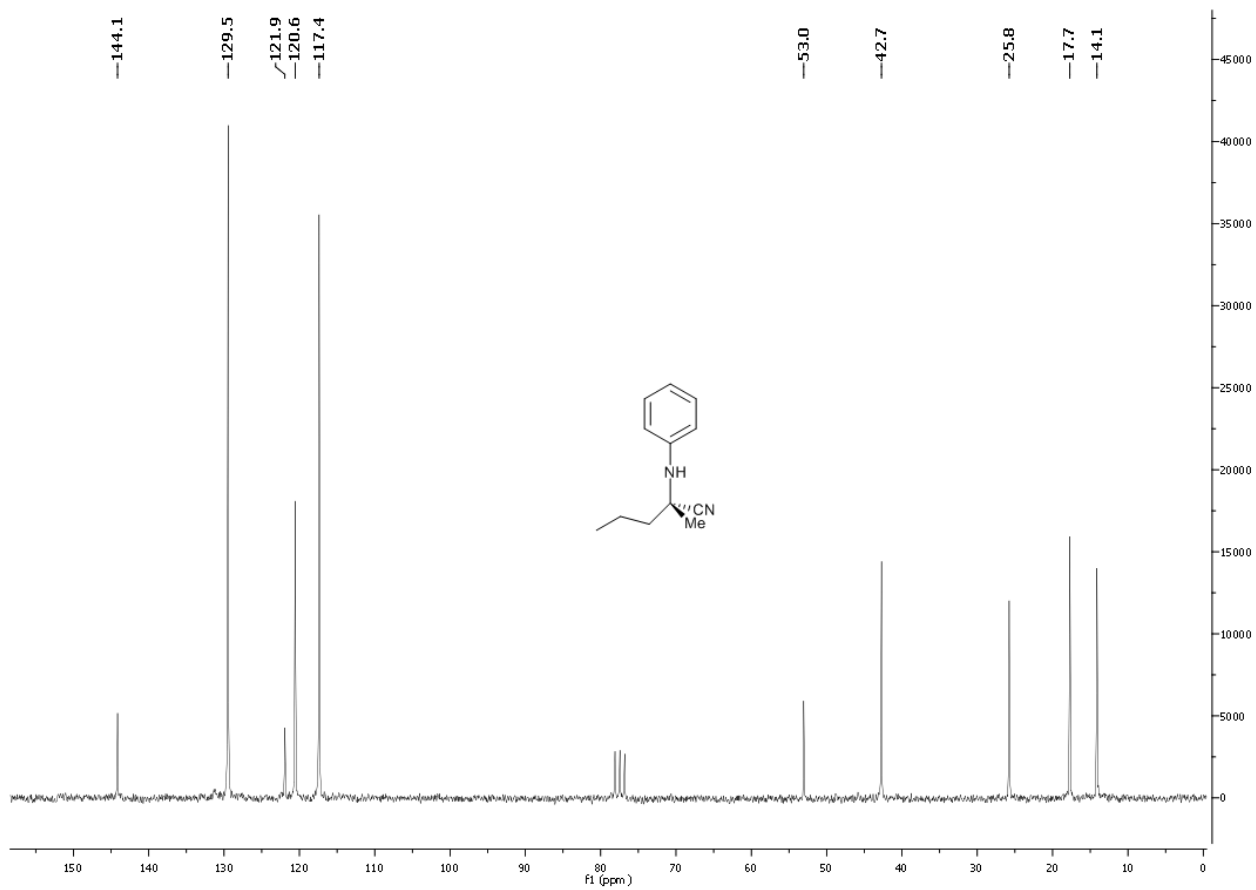

### 14.13 2-Phenyl-2-phenylaminoacetonitrile (21m).

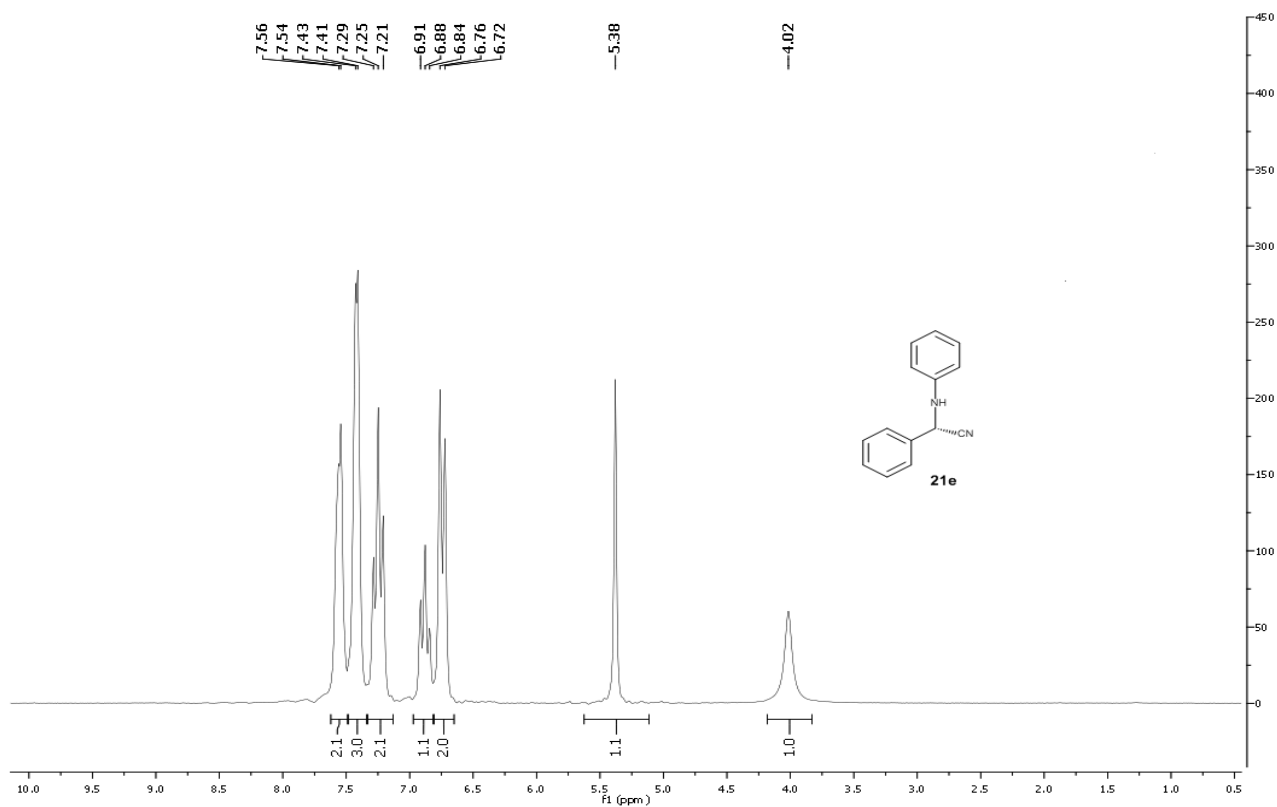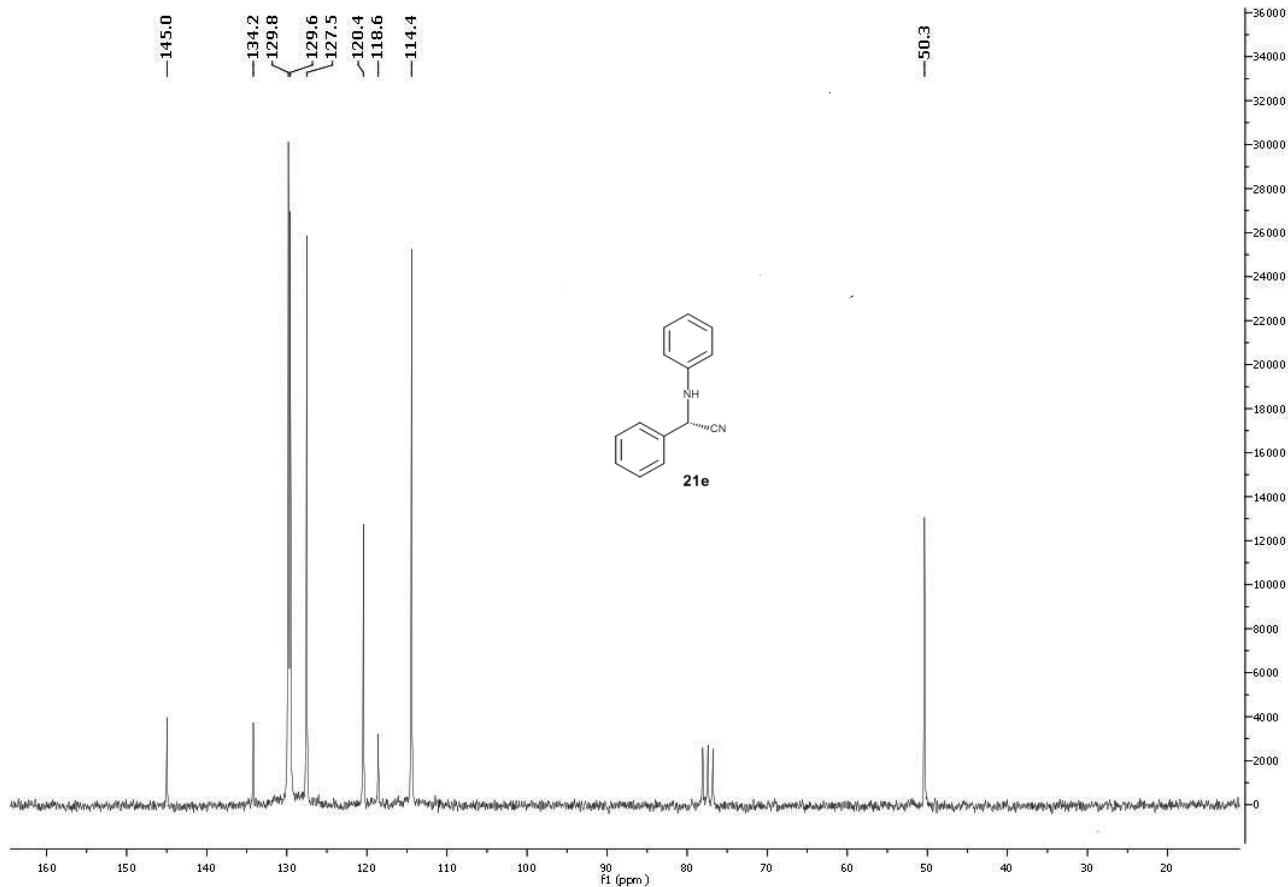

### 14.14 2-(4-Nitrophenyl)-2-phenylaminoacetonitrile (21n)

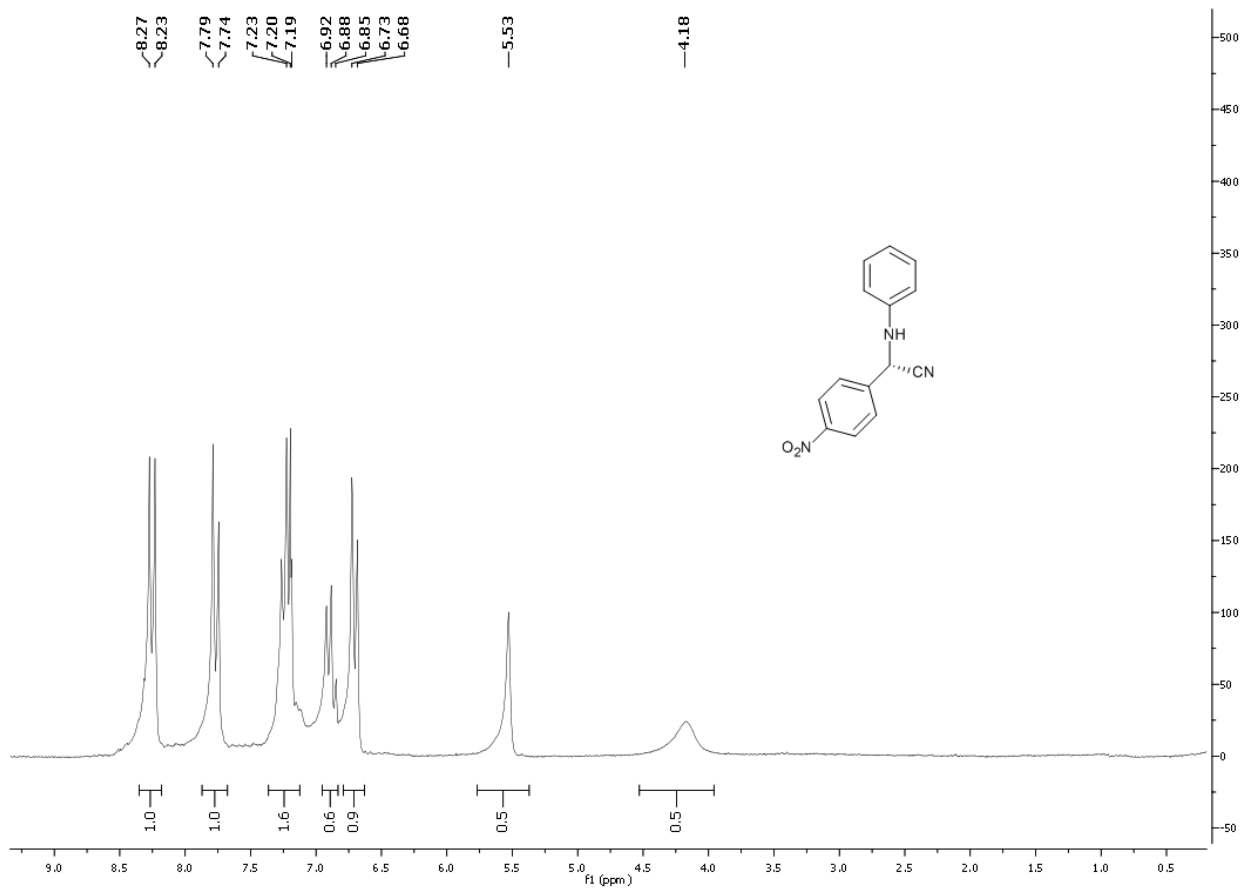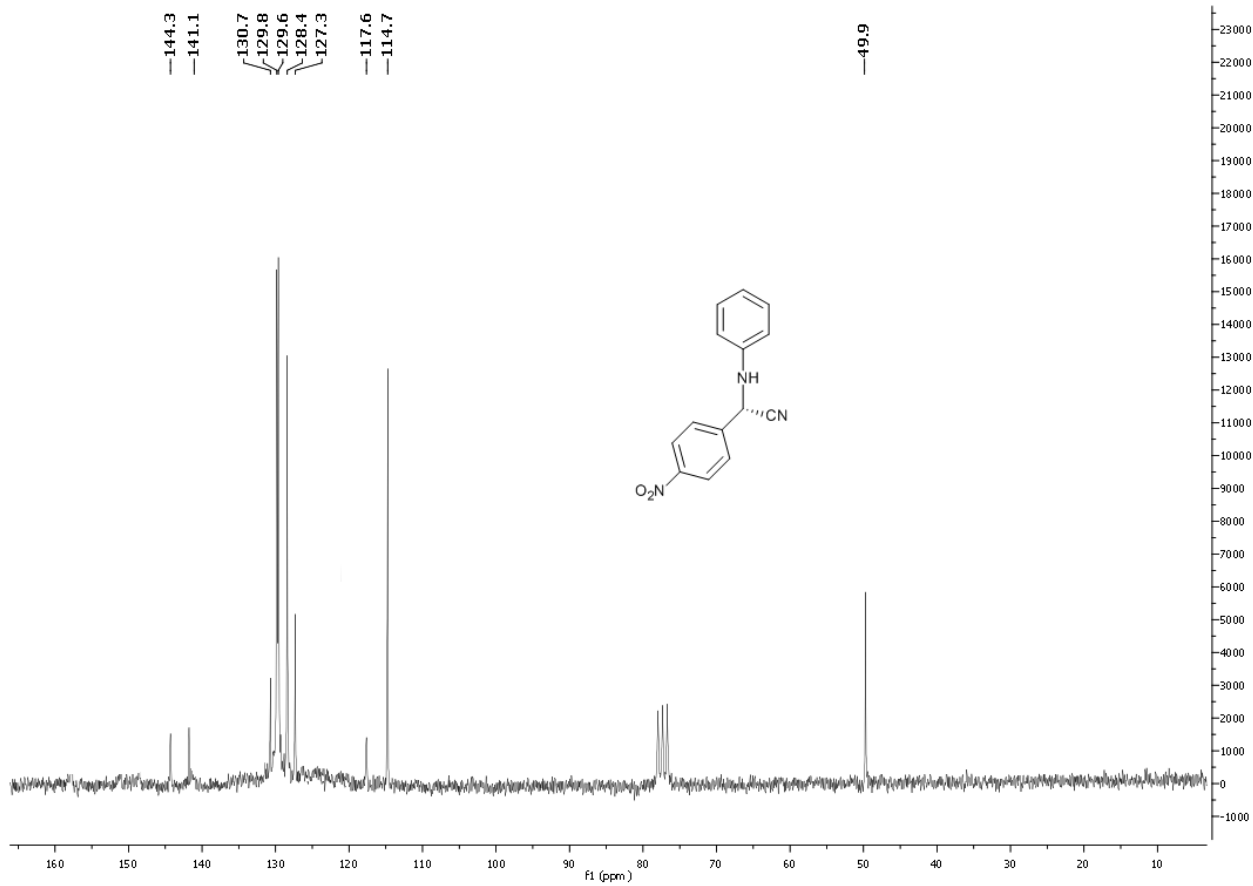

### 14.15 2-Phenylamino-2-(4-tolyl)acetonitrile (21o)

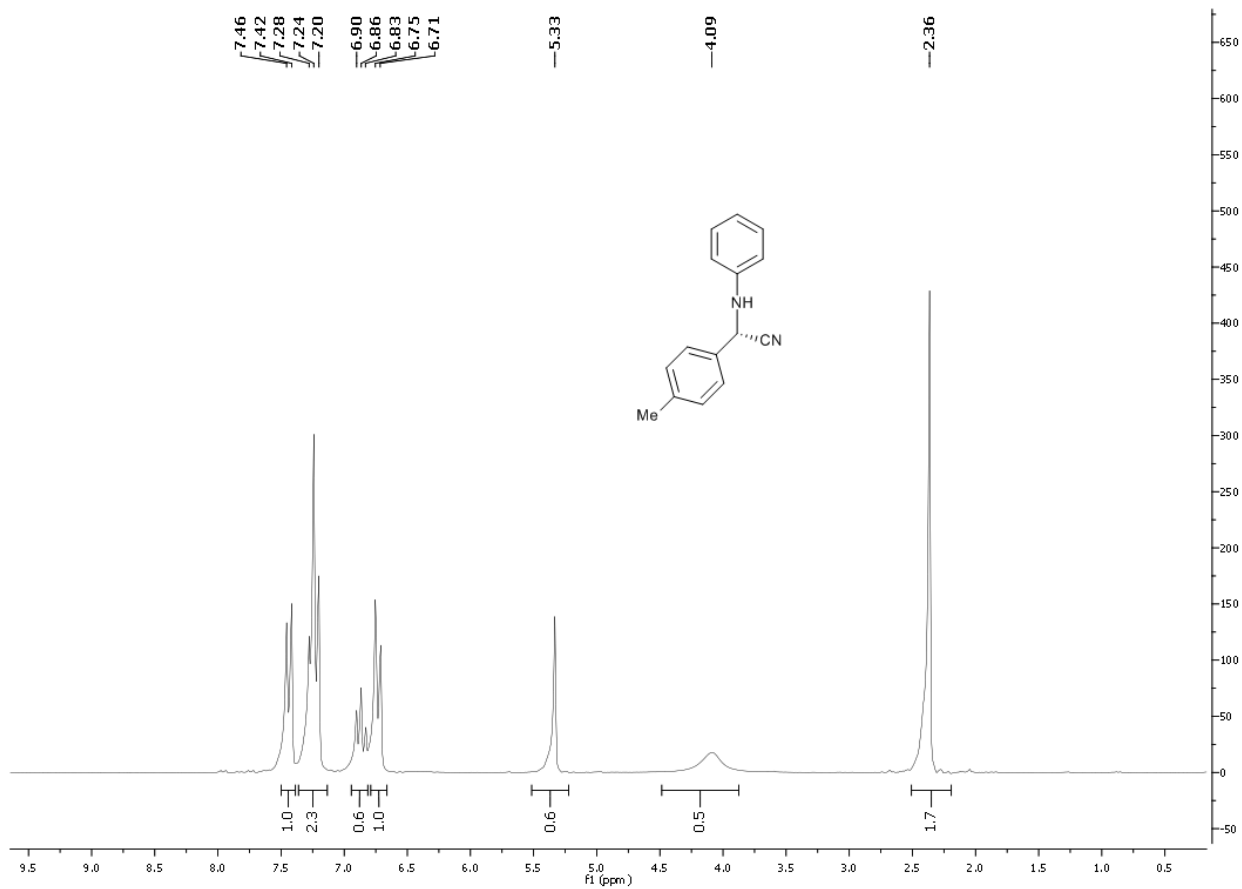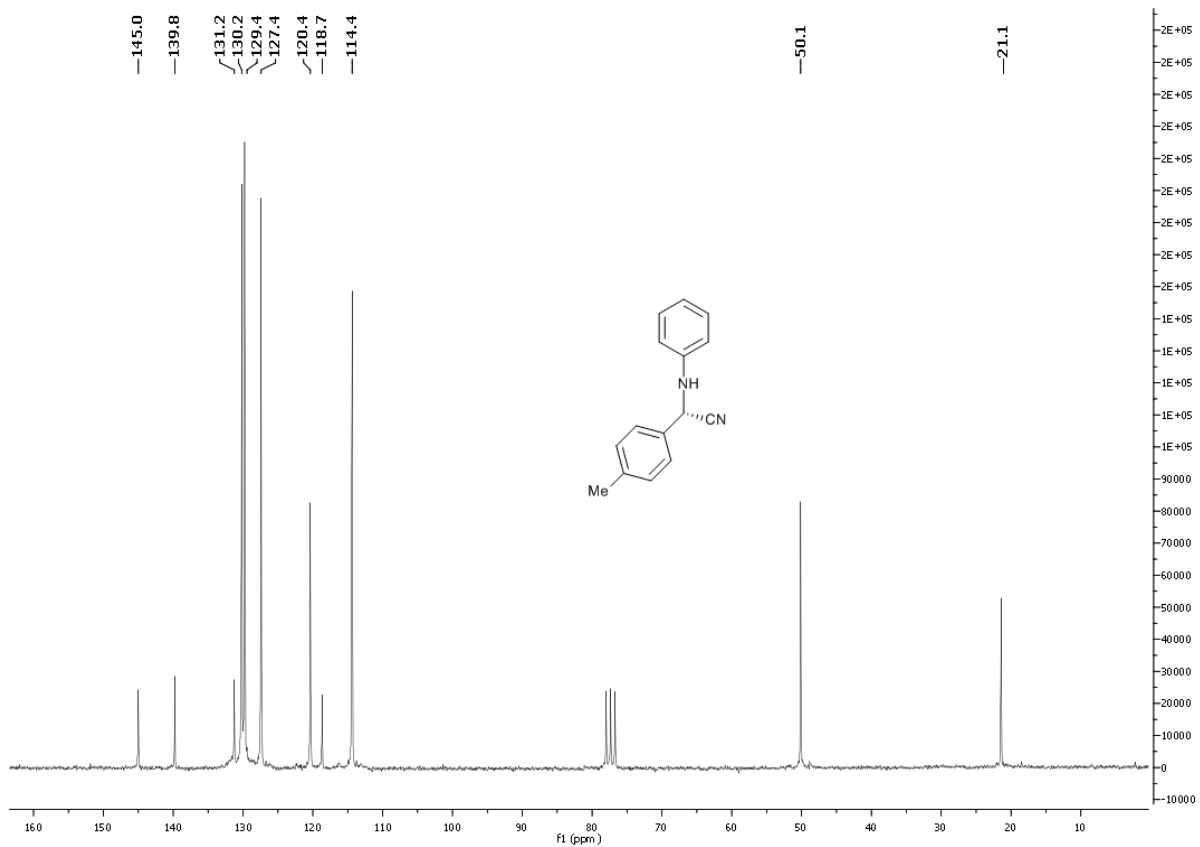

# 14.16 2-Phenylamino-2-(2-thienyl)acetonitrile (21o)

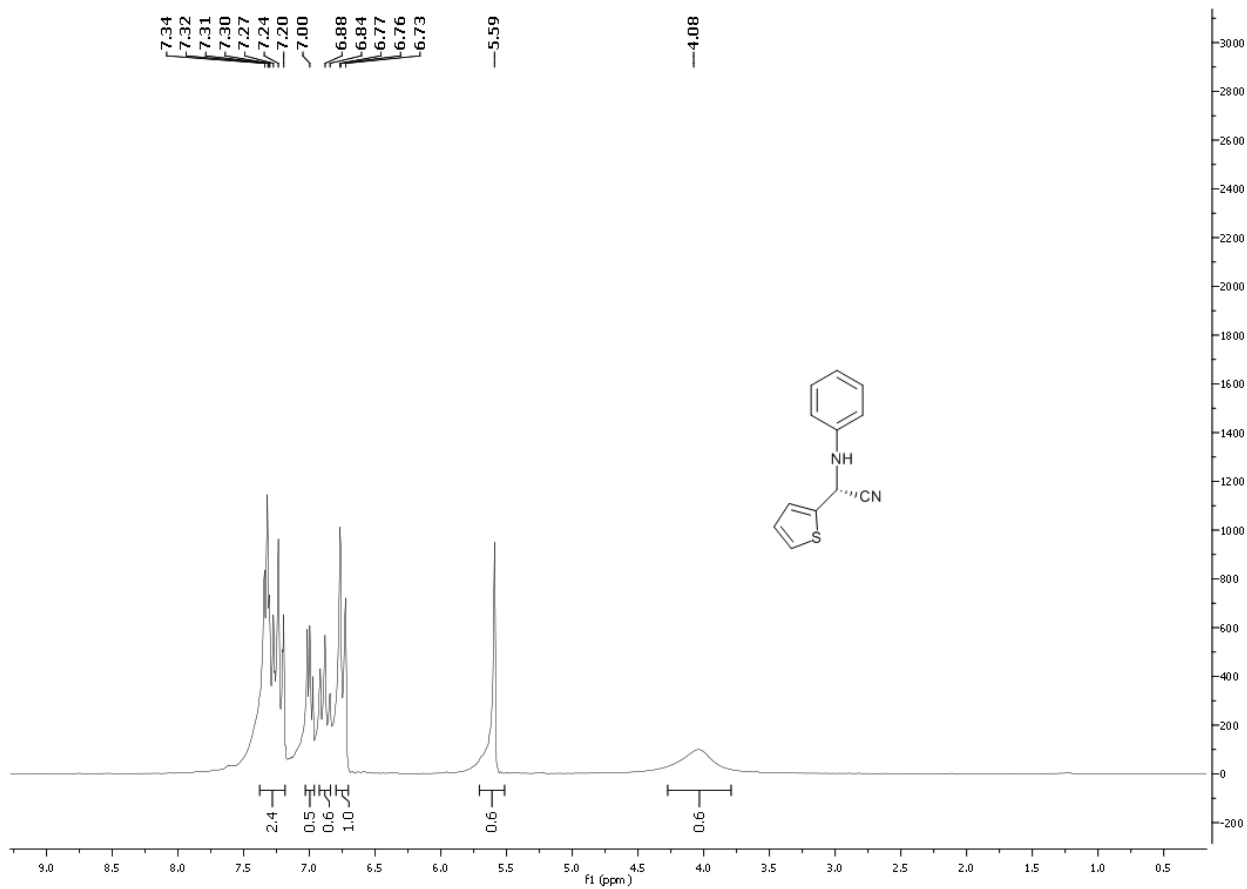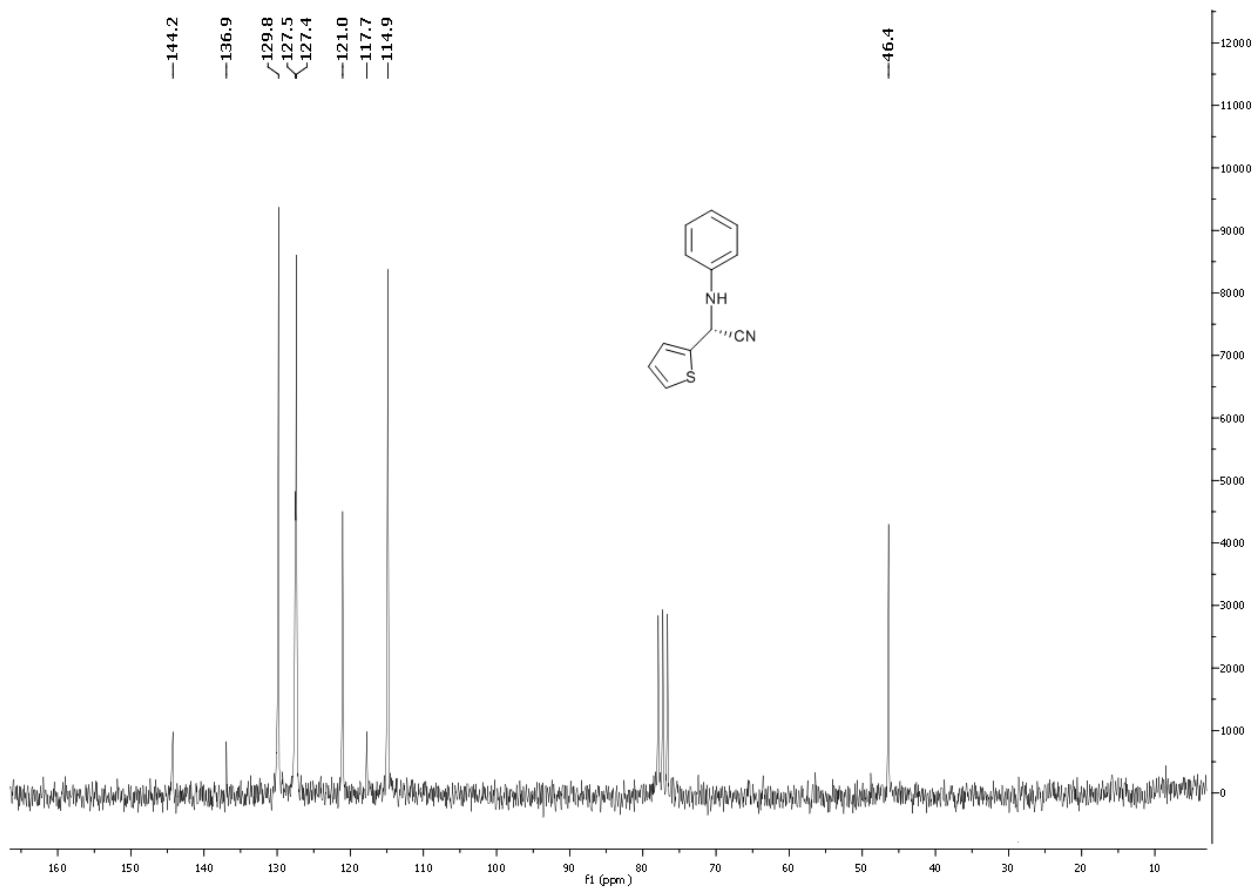

## 15. Chiral GC spectra of nitriles 21

### 15.1 Enantiomers of 2-phenyl-2-phenylaminopropanenitrile (21a)

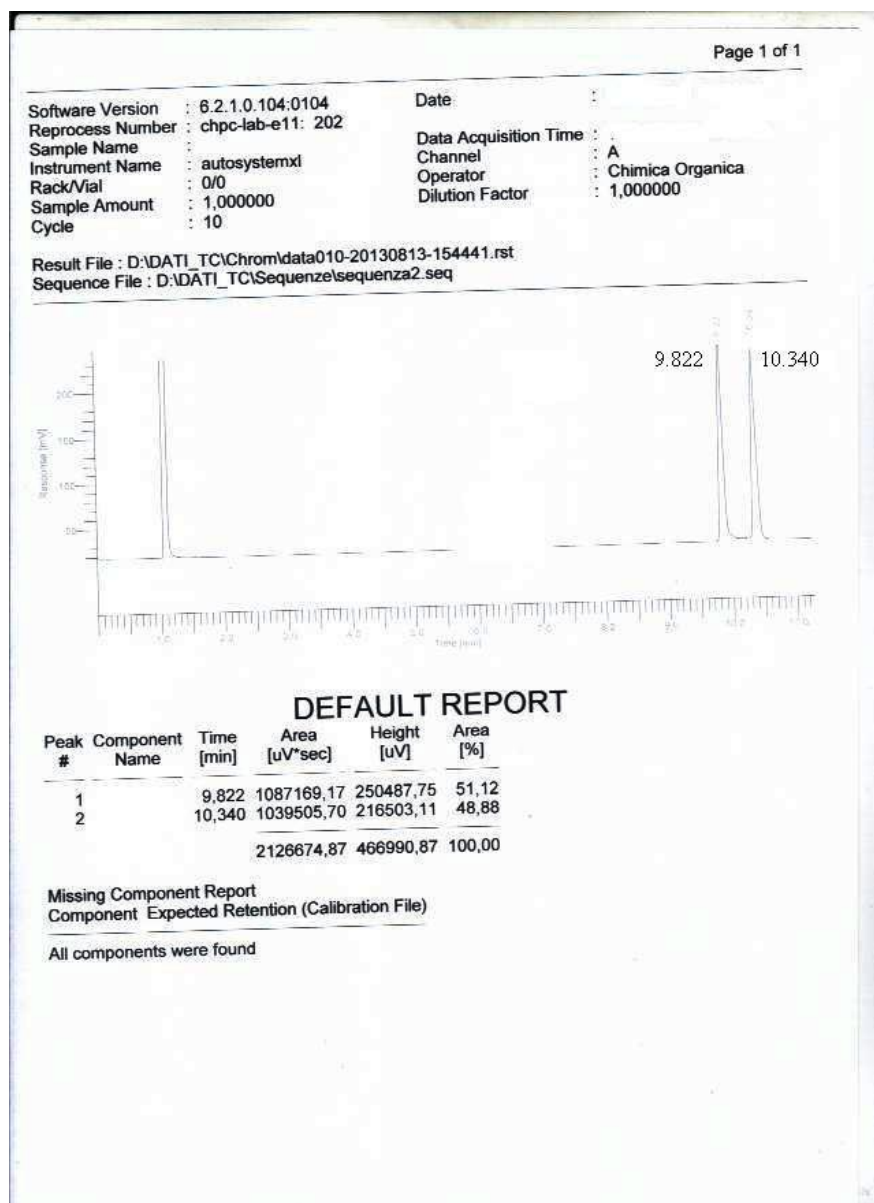

15.2 2-Phenyl-2-phenylaminopropanenitrile (21a), obtained at 0°C in the presence of catalyst 3a

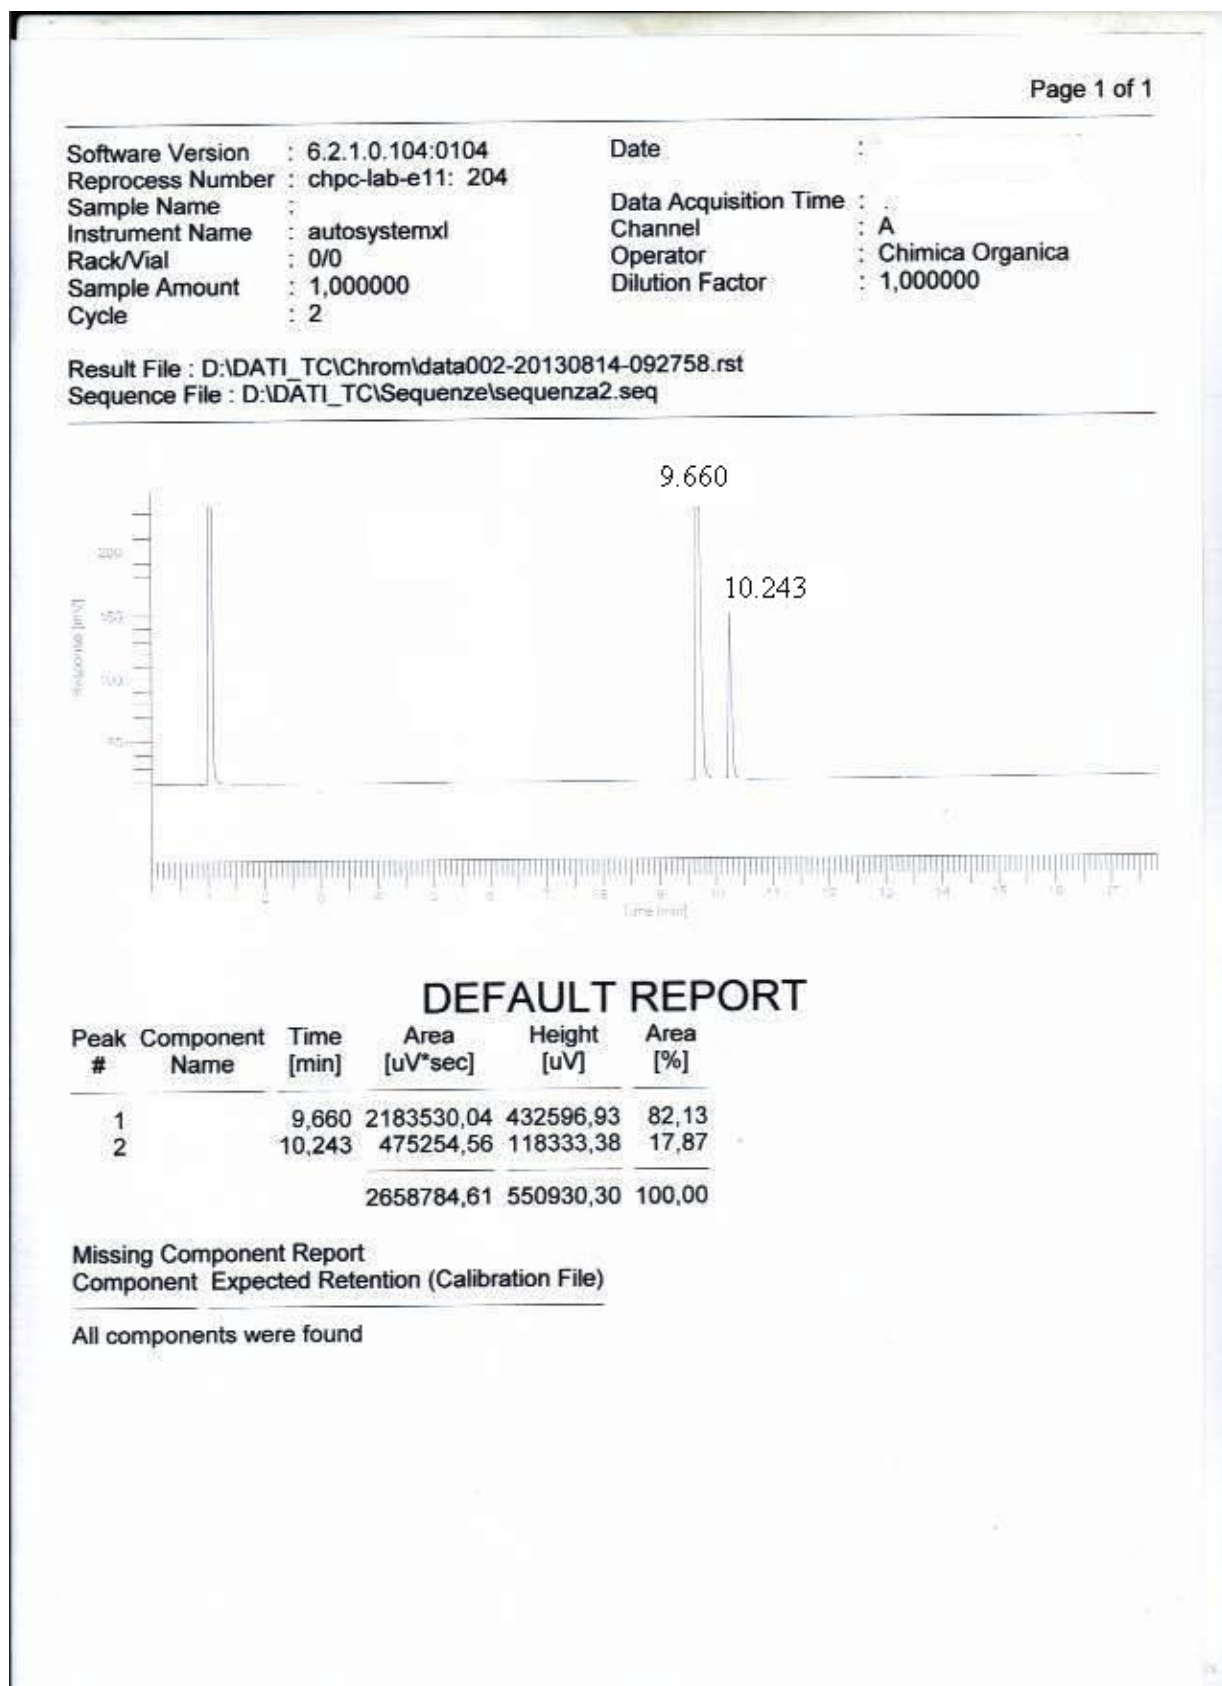



15.3 2-Phenyl-2-phenylaminopropanenitrile (21a), obtained at -20°C in the presence of catalyst 3b

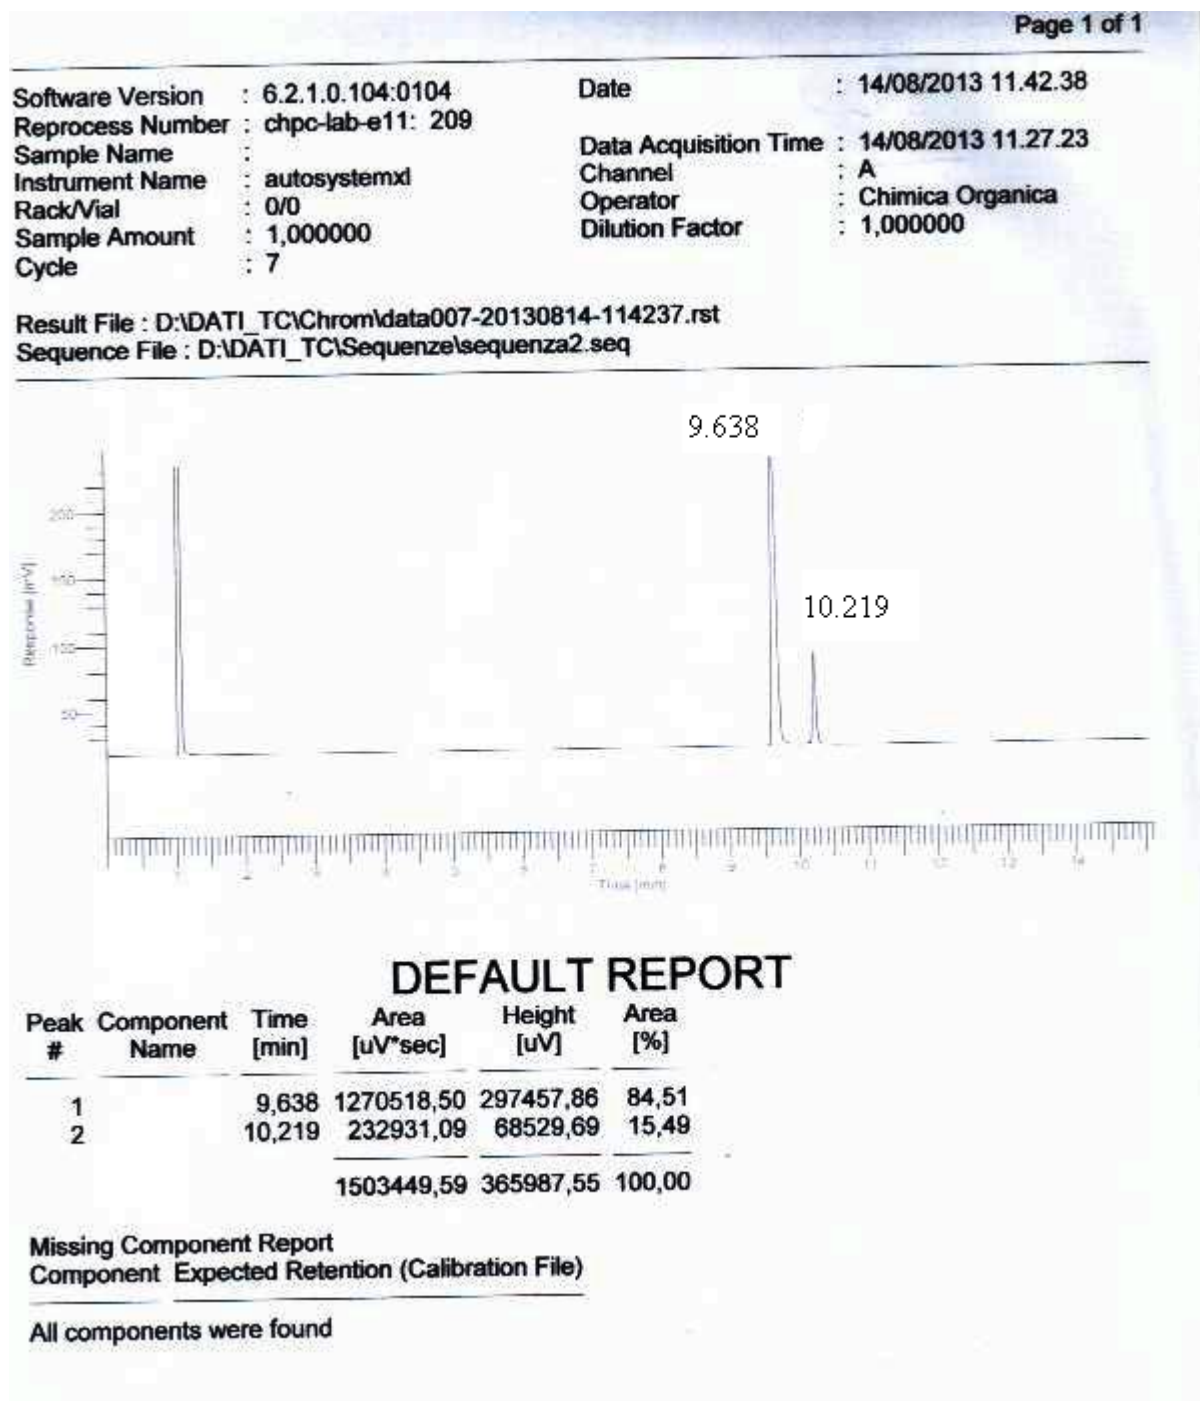

**15.4 2-Phenyl-2-phenylaminopropanenitrile (21a), obtained at 0°C in the presence of catalyst 3b**

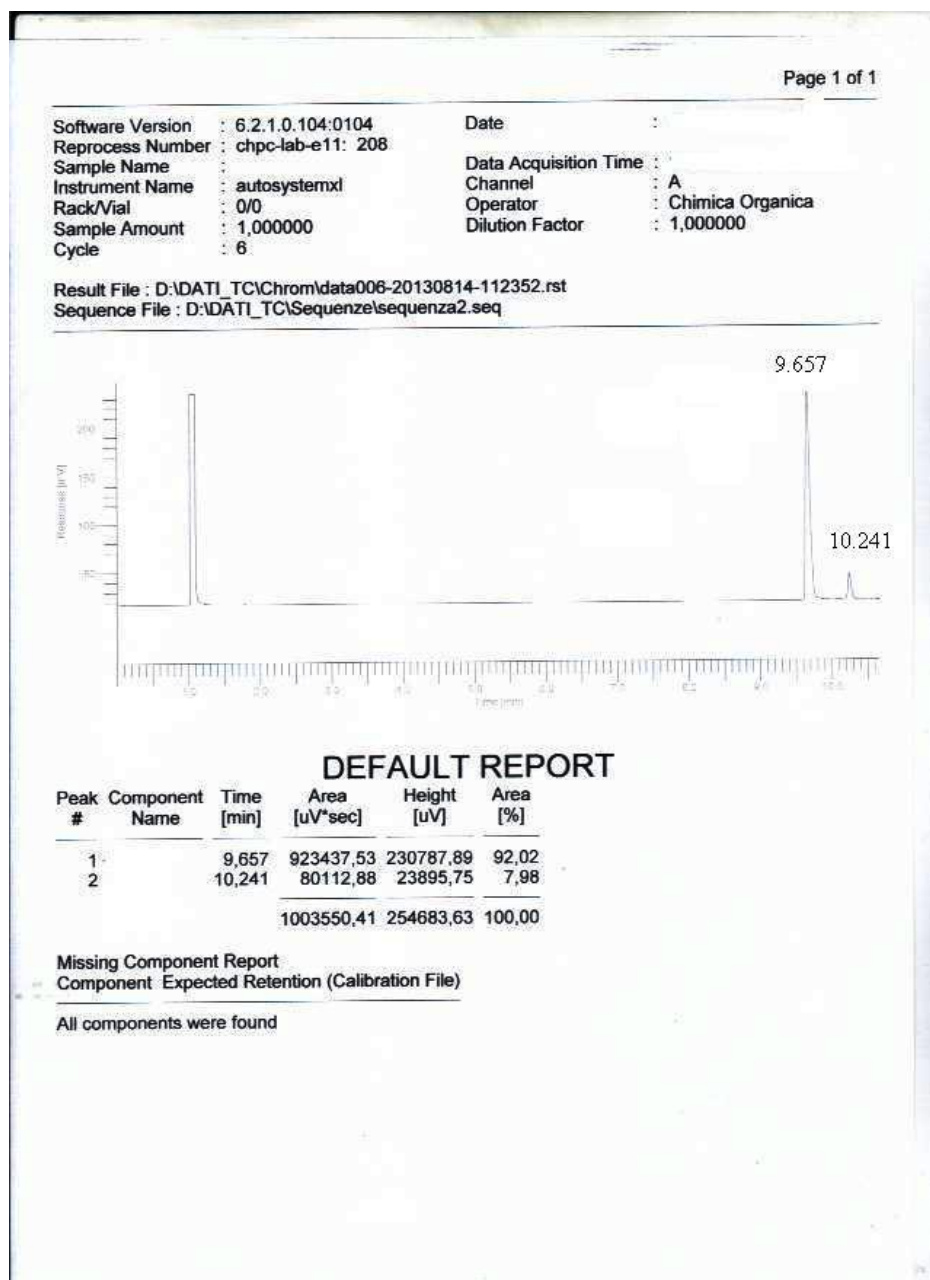

**15.5 2-Phenyl-2-phenylaminopropanenitrile (21a), obtained at -20 °C in the presence of catalyst 3b**

Software Version : 6.2.1.0.104:0104      Date :  
 Reprocess Number : chpc-lab-e11: 213  
 Sample Name :  
 Instrument Name : autosystemxl      Data Acquisition Time :  
 Rack/Vial : 0/0      Channel : A  
 Sample Amount : 1,000000      Operator : Chimica Organica  
 Cycle : 4      Dilution Factor : 1,000000

Result File : D:\DATI\_TC\Chrom\data004-20131118-121808.rst  
 Sequence File : D:\DATI\_TC\Sequenze\sequenza2.seq

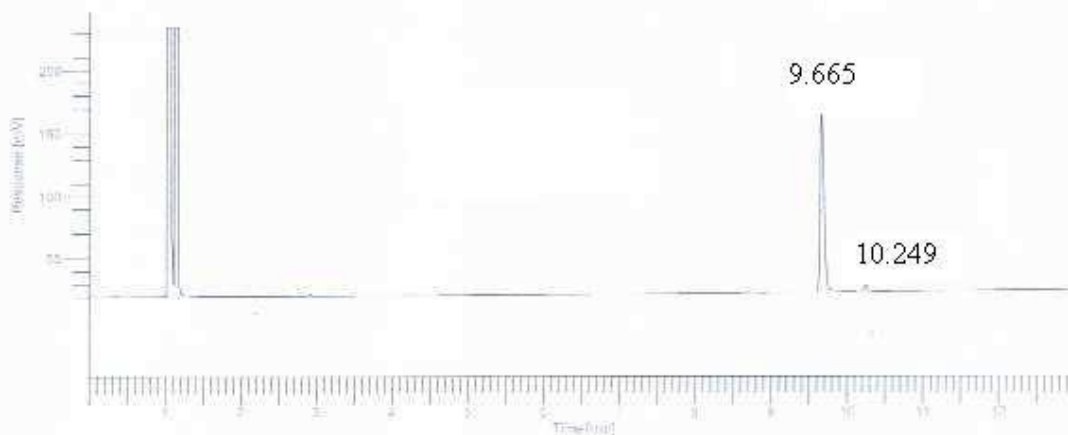

**DEFAULT REPORT**

| Peak # | Component Name | Time [min] | Area [uV*sec] | Height [uV] | Area [%] |
|--------|----------------|------------|---------------|-------------|----------|
| 1      |                | 9,665      | 515090,97     | 133054,96   | 97,36    |
| 2      |                | 10,249     | 13967,16      | 4333,00     | 2,64     |
|        |                |            | 529058,13     | 137387,96   | 100,00   |

Missing Component Report  
 Component Expected Retention (Calibration File)

All components were found

15.6 2-(4-Methoxyphenylamino)-2-phenylpropanenitrile (21b), obtained at -20°C in the presence of catalyst 3b

Software Version : 6.2.1.0.104:0104      Date : 10/12/2013 11.30.03  
 Reprocess Number : chpc-lab-e11: 225      Data Acquisition Time : 10/12/2013 11.16.47  
 Sample Name :      Channel : A  
 Instrument Name : autosystemxl      Operator : Chimica Organica  
 Rack/Vial : 0/0      Dilution Factor : 1,000000  
 Sample Amount : 1,000000  
 Cycle : 4

Result File : D:\DATI\_TC\Chrom\data004-20131210-113002.rst  
 Sequence File : D:\DATI\_TC\Sequenze\sequenza2.seq

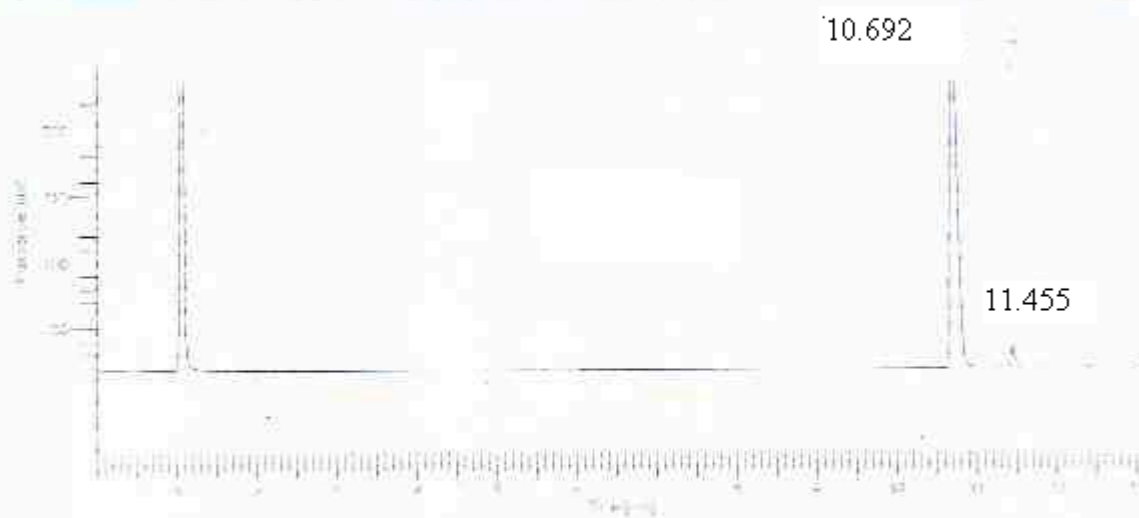

**DEFAULT REPORT**

| Peak # | Component Name | Time [min] | Area [uV*sec] | Height [uV] | Area [%] |
|--------|----------------|------------|---------------|-------------|----------|
| 1      |                | 10,692     | 1786914,72    | 331963,43   | 97,38    |
| 2      |                | 11,455     | 48108,37      | 14184,39    | 2,62     |
|        |                |            | 1835023,10    | 346157,82   | 100,00   |

Missing Component Report  
 Component Expected Retention (Calibration File)

All components were found

15.7 2-(4-Nitrophenylamino)-2-phenylpropanenitrile (21c), obtained at -20°C in the presence of catalyst 3b

Software Version : 6.2.1.0.104:0104      Date : 10/12/2013 13.30.28  
 Reprocess Number : chpc-lab-e11: 226  
 Sample Name :  
 Instrument Name : autosystemdx      Data Acquisition Time : 10/12/2013 13.16.28  
 Rack/Vial : 0/0      Channel : A  
 Sample Amount : 1,000000      Operator : Chimica Organica  
 Cycle : 5      Dilution Factor : 1,000000

Result File : D:\DATI\_TC\Chrom\data005-20131210-133027.rst  
 Sequence File : D:\DATI\_TC\Sequenzelsequenza2.seq

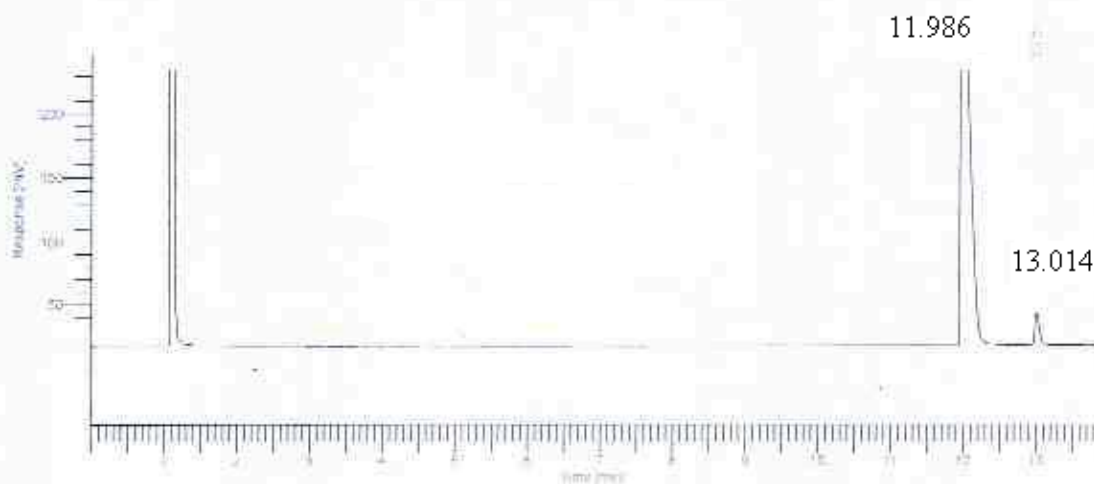

### DEFAULT REPORT

| Peak # | Component Name | Time [min] | Area [uV*sec] | Height [uV] | Area [%] |
|--------|----------------|------------|---------------|-------------|----------|
| 1      |                | 11,986     | 2883604,07    | 369290,20   | 96,59    |
| 2      |                | 13,014     | 101944,84     | 23837,85    | 3,41     |
|        |                |            | 2985548,91    | 393128,05   | 100,00   |

#### Missing Component Report

Component Expected Retention (Calibration File)

All components were found



15.8 2-(4-Bromophenylamino)-2-phenylpropanenitrile (21d), obtained at -20°C in the presence of catalyst 3b

Software Version : 6.2.1.0.104:0104  
 Reprocess Number : hsmc11: 11011  
 Sample Name :  
 Instrument Name : AUTOSYSTEM\_XL  
 Rack/Vial : 0/0  
 Sample Amount : 1.000000  
 Cycle : 4  
 Date : 27-Feb-14 09:11:33  
 Data Acquisition Time : 27-Feb-14 08:57:03  
 Channel : A  
 Operator : laboratorio3  
 Dilution Factor : 1.000000

Result File : D:\DATI\_TC\Chrom\data004-20140227-091133.rst  
 Sequence File : D:\DATI\_TC\Sequenze\sequenza1.seq

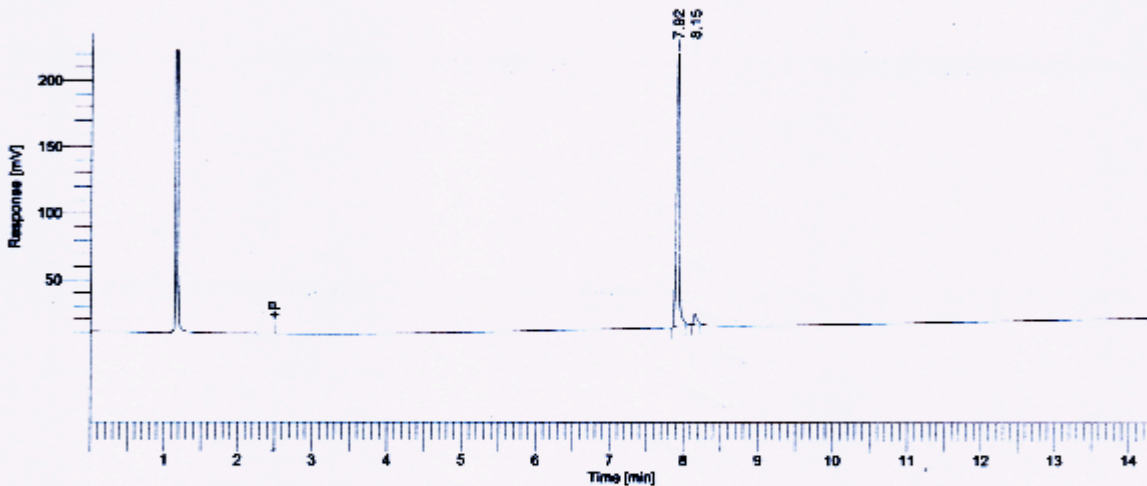

### DEFAULT REPORT

| Peak # | Component Name | Time [min] | Area [uV*sec] | Height [uV] | Area [%] |
|--------|----------------|------------|---------------|-------------|----------|
| 1      |                | 7.915      | 546681.78     | 206819.53   | 95.87    |
| 2      |                | 8.147      | 23564.60      | 7765.61     | 4.13     |
|        |                |            | 570246.38     | 214585.14   | 100.00   |

15.9 2-(4-Fluorophenylamino)-2-phenylpropanenitrile (21e), obtained at -20°C in the presence of catalyst 3b

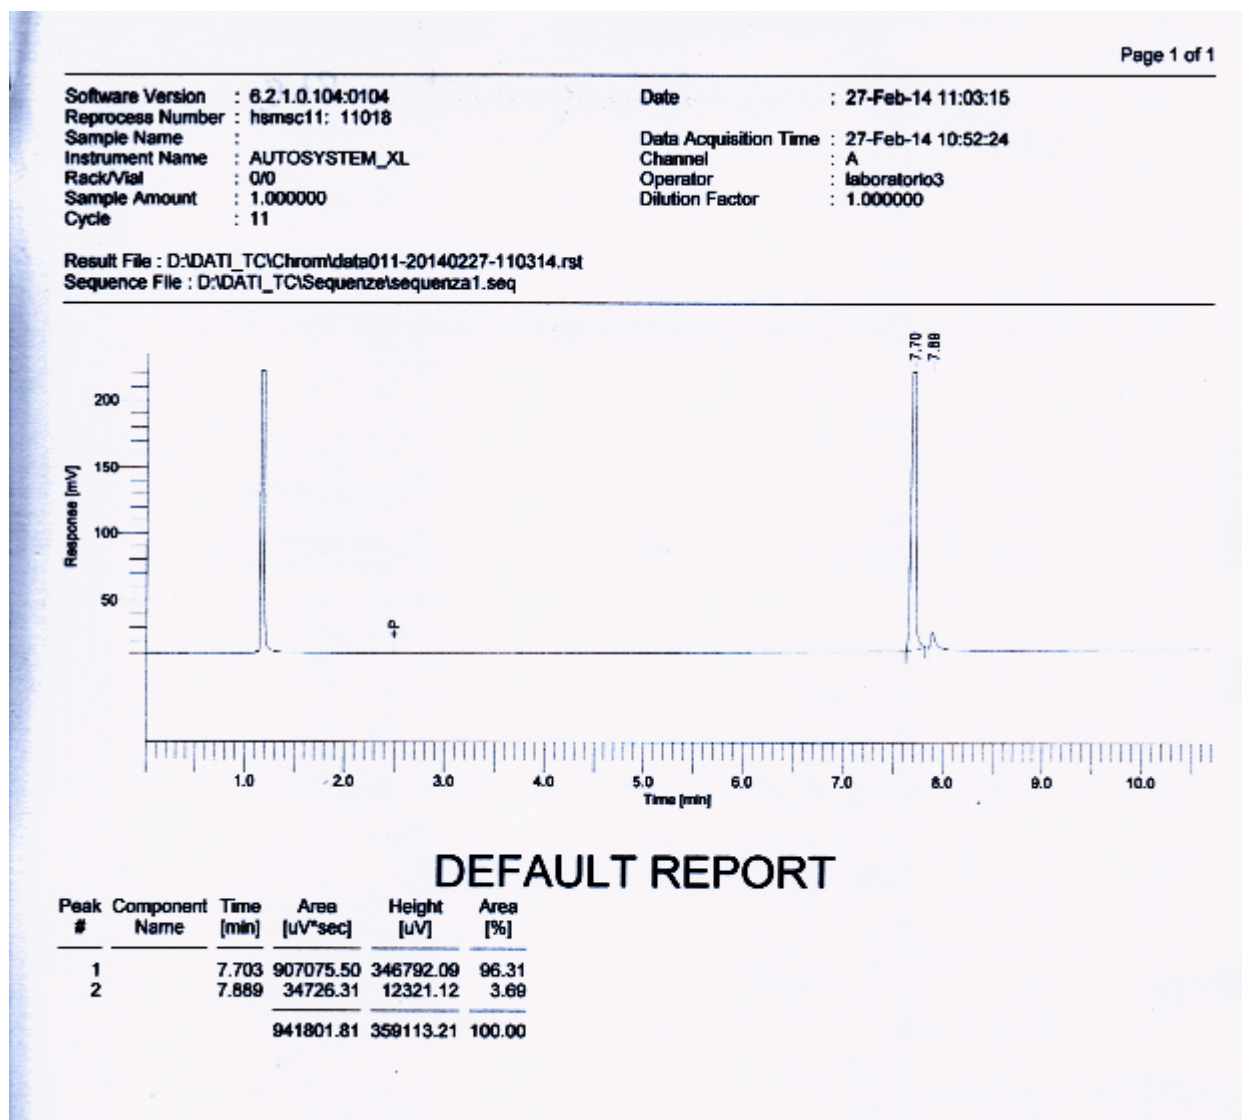

15.10 2-(2-Methoxyphenylamino)-2-phenylpropanenitrile (21f), obtained at -20°C in the presence of catalyst 3b

Software Version : 6.2.1.0.104:0104 Date : 10/12/2013 14.10.06  
 Reprocess Number : chpc-lab-e11: 228  
 Sample Name : Data Acquisition Time : 10/12/2013 13.56.53  
 Instrument Name : autosystemxl Channel : A  
 Rack/Vial : 0/0 Operator : Chimica Organica  
 Sample Amount : 1,000000 Dilution Factor : 1,000000  
 Cycle : 7

Result File : D:\DATI\_TC\Chrom\data007-20131210-141005.rst  
 Sequence File : D:\DATI\_TC\Sequenzelsequenza2.seq

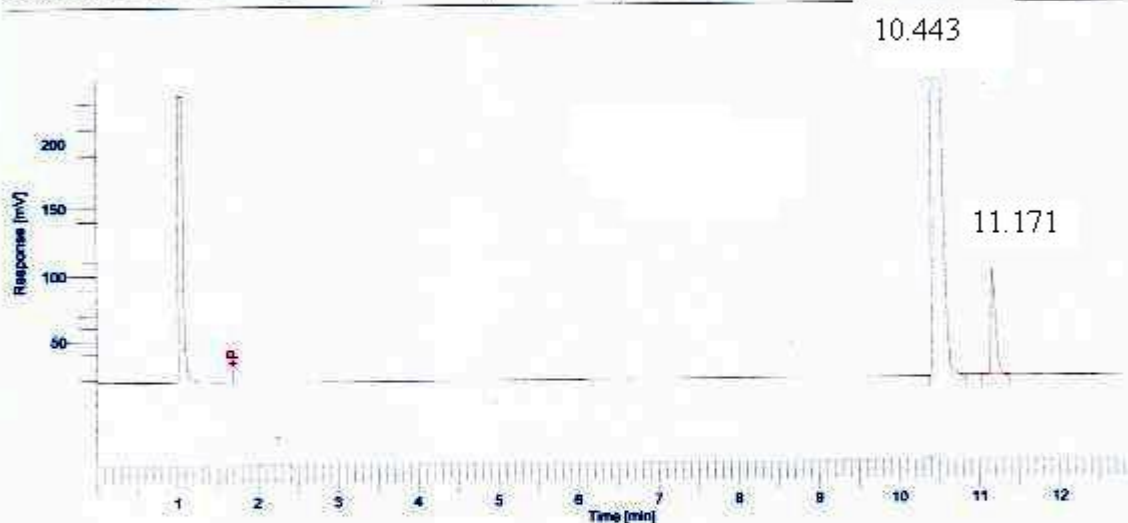

### DEFAULT REPORT

| Peak # | Component Name | Time [min] | Area [uV*sec] | Height [uV] | Area [%] |
|--------|----------------|------------|---------------|-------------|----------|
| 1      |                | 10,443     | 3278544,56    | 540019,98   | 91,19    |
| 2      |                | 11,171     | 316589,49     | 81383,74    | 8,81     |
|        |                |            | 3595134,06    | 621403,72   | 100,00   |

Missing Component Report  
 Component Expected Retention (Calibration File)

All components were found



15.11 2-(3-Methoxyphenylamino)-2-phenylpropanenitrile (21g), obtained at -20°C in the presence of catalyst 3b

Software Version : 6.2.1.0.104:0104  
 Reprocess Number : hamsc11: 11019  
 Sample Name :  
 Instrument Name : AUTOSYSTEM\_XL  
 Rack/Vial : 0/0  
 Sample Amount : 1.000000  
 Cycle : 12  
 Date : 27-Feb-14 11:23:01  
 Data Acquisition Time : 27-Feb-14 11:07:49  
 Channel : A  
 Operator : laboratorio3  
 Dilution Factor : 1.000000

Result File : D:\DATI\_TC\Chrom\data012-20140227-112300.rst  
 Sequence File : D:\DATI\_TC\Sequenze\sequenza1.seq

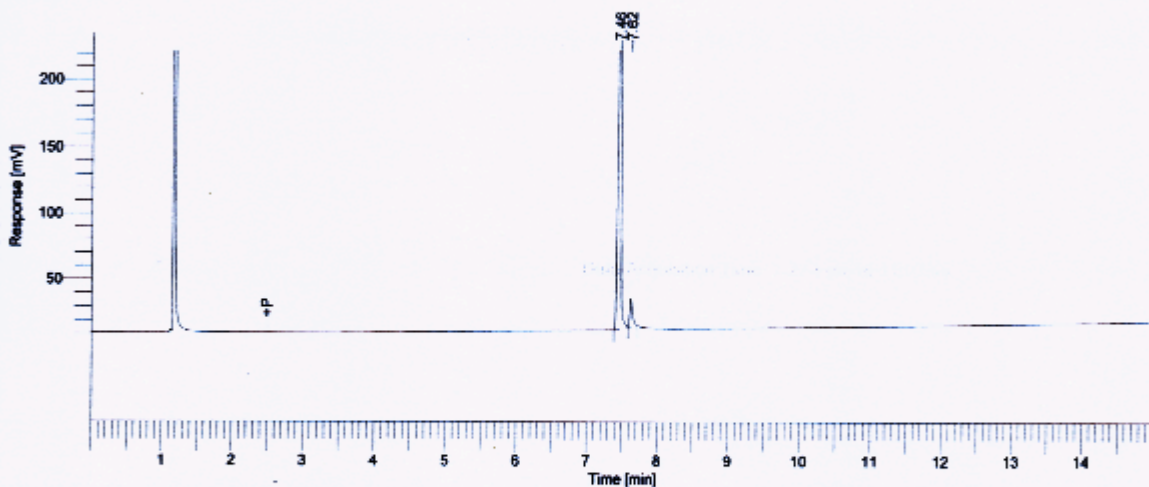

### DEFAULT REPORT

| Peak # | Component Name | Time [min] | Area [uV*sec] | Height [uV] | Area [%] |
|--------|----------------|------------|---------------|-------------|----------|
| 1      |                | 7.462      | 1015354.76    | 414864.41   | 94.71    |
| 2      |                | 7.623      | 58873.89      | 20690.97    | 5.29     |
|        |                |            | 1072028.64    | 435555.38   | 100.00   |

15.12 2-Phenylamino-2-(4-tolyl)propanenitrile (21h), obtained at -20°C in the presence of catalyst 3b

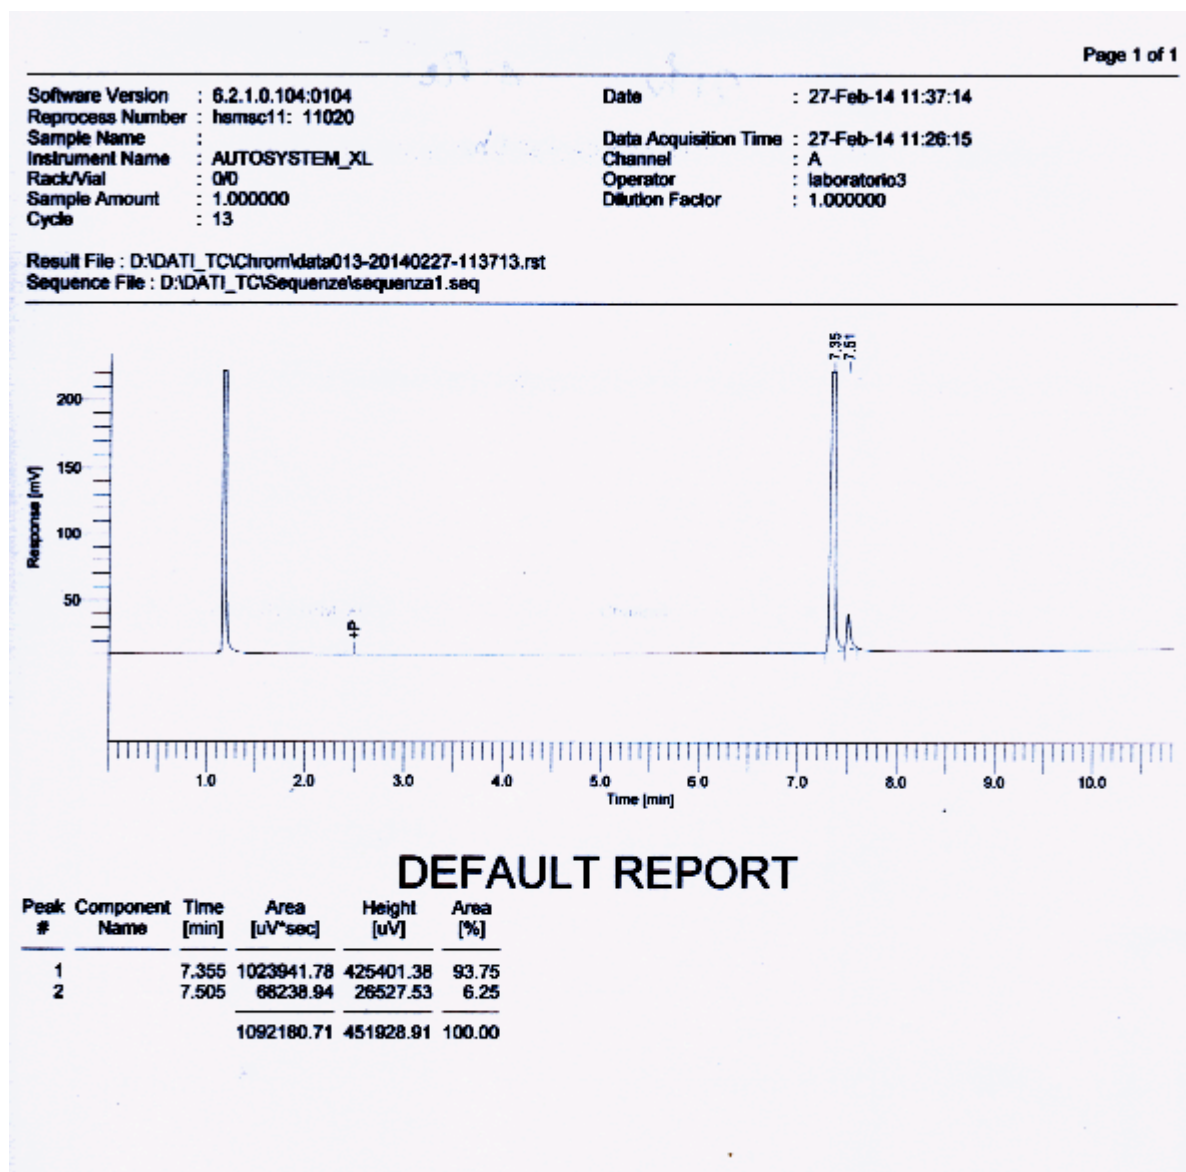

15.13 2-(4-Nitrophenylamino)-2-(4-tolyl)propanenitrile (21i), obtained at -20°C in the presence of catalyst 3b

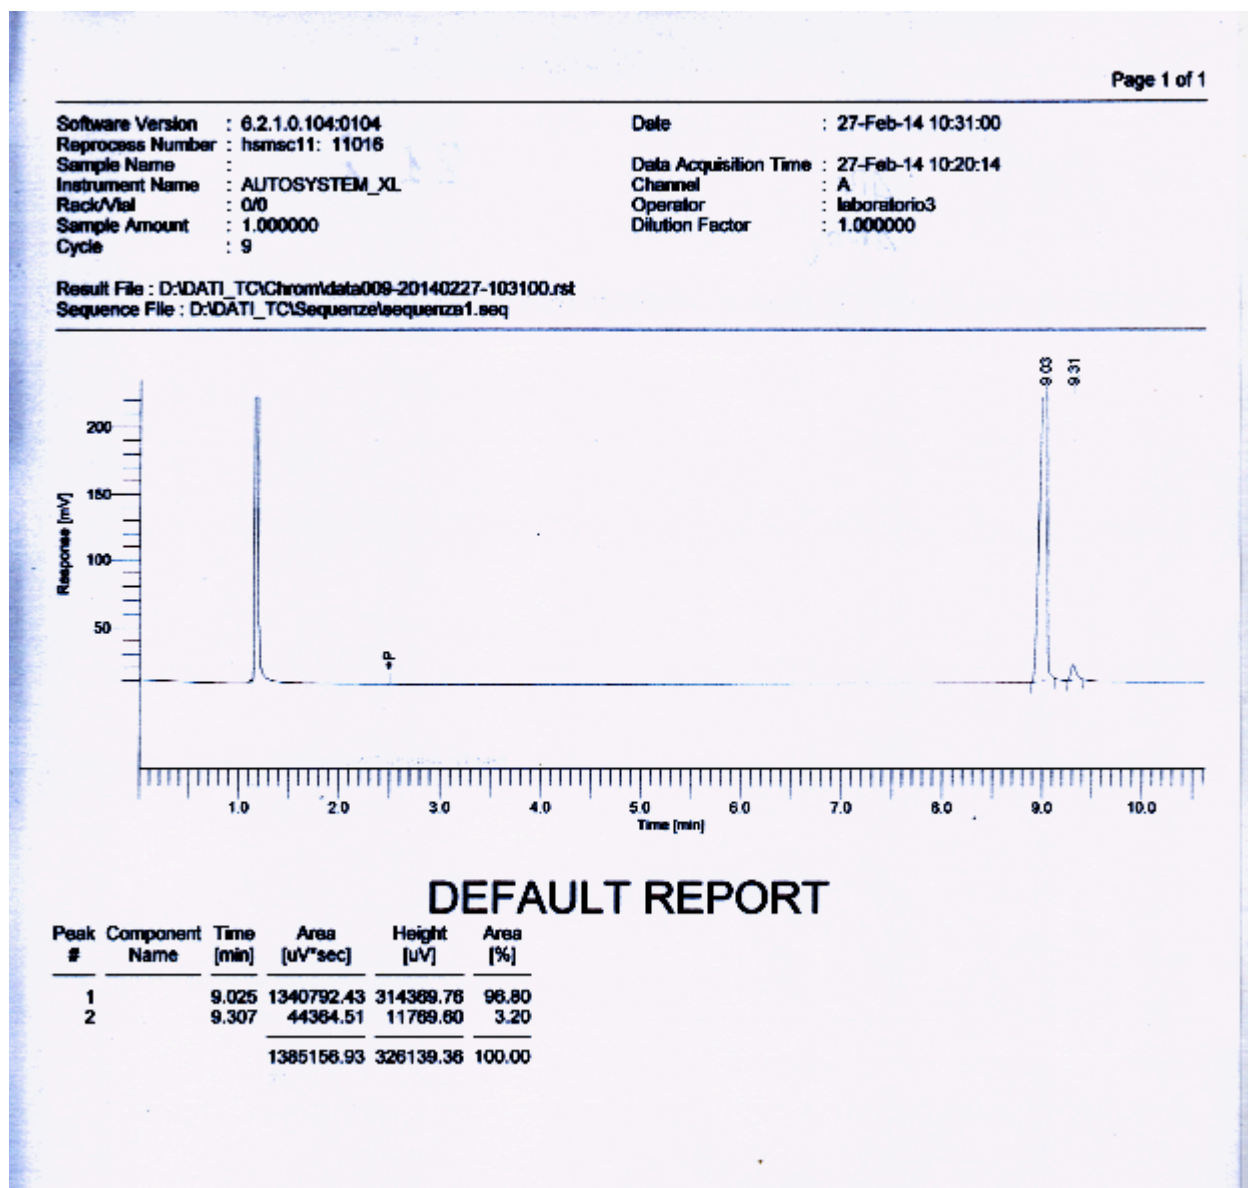

15.14 2-(4-Methoxyphenylamino)-2-(4-tolyl)propanenitrile (21j), obtained at -20°C in the presence of catalyst 3b

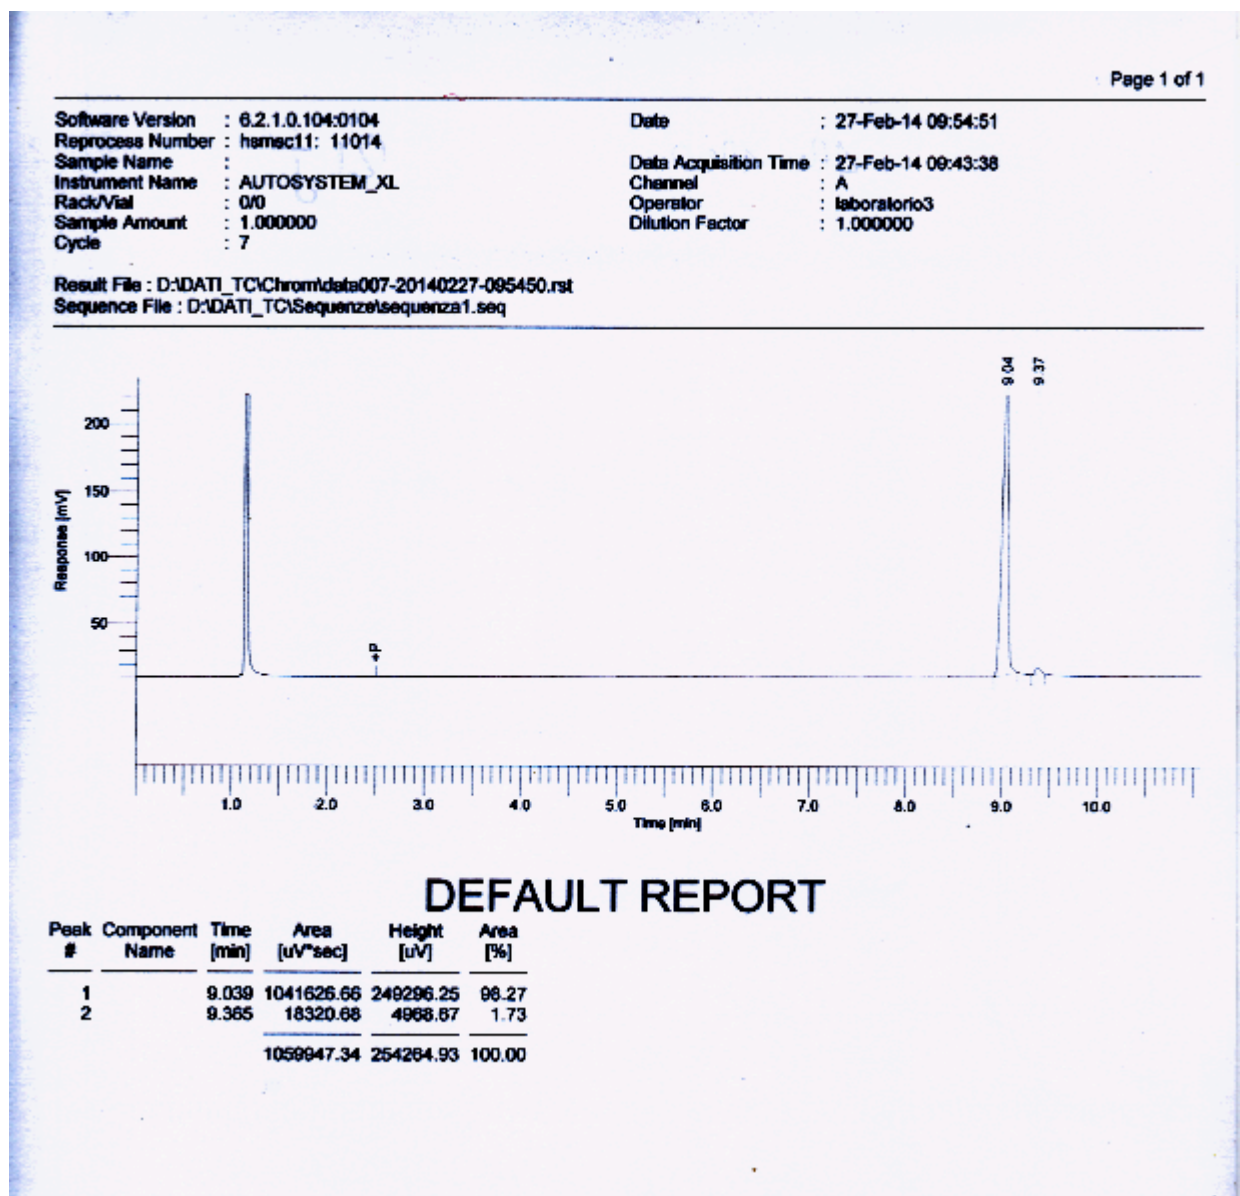

15.15 2-(4-Methoxyphenylamino)-2-(4-nitrophenyl)propanenitrile (21k), obtained at -20°C in the presence of catalyst 3b

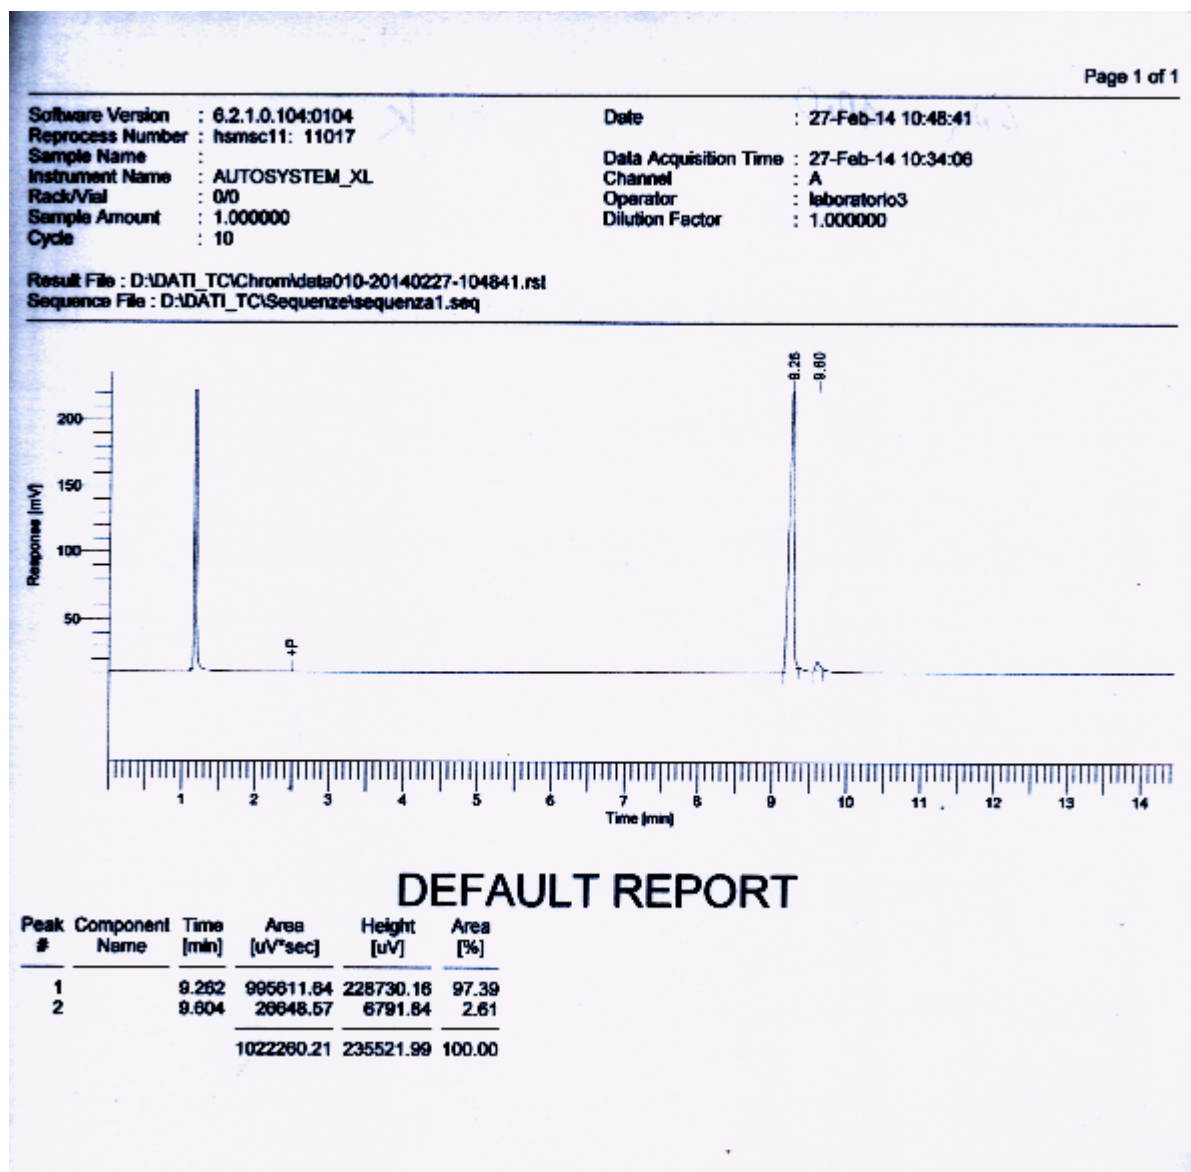



15.16 2-Methyl-2-(phenylamino)pentanenitrile (211), obtained at -20°C in the presence of catalyst 3b

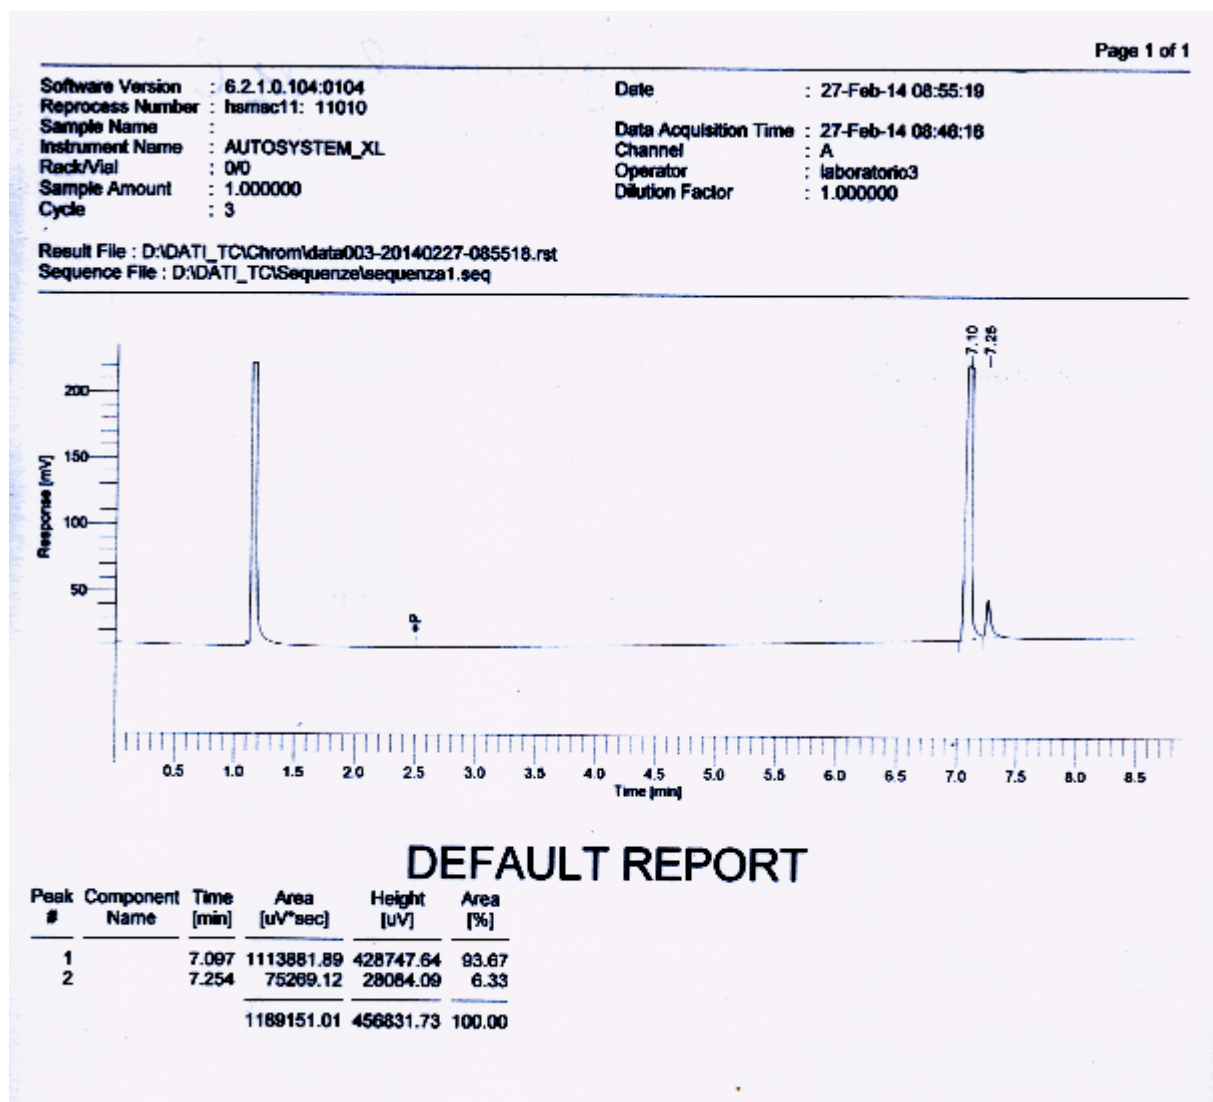

15.17 2-Phenyl-2-phenylaminoacetonitrile (21m), obtained at -20°C in the presence of catalyst 3b

Software Version : 6.2.1.0.104:0104 Date : 10/12/2013 16.32.09  
 Reprocess Number : chpc-lab-e11: 229 Data Acquisition Time : 10/12/2013 16.21.54  
 Sample Name : Instrument Name : autosystemx Channel : A  
 Rack/Vial : 0/0 Operator : Chimica Organica  
 Sample Amount : 1,000000 Dilution Factor : 1,000000  
 Cycle : 8

Result File : D:\DATI\_TC\Chrom\data008-20131210-163209.rst  
 Sequence File : D:\DATI\_TC\Sequenze\sequenza2.seq

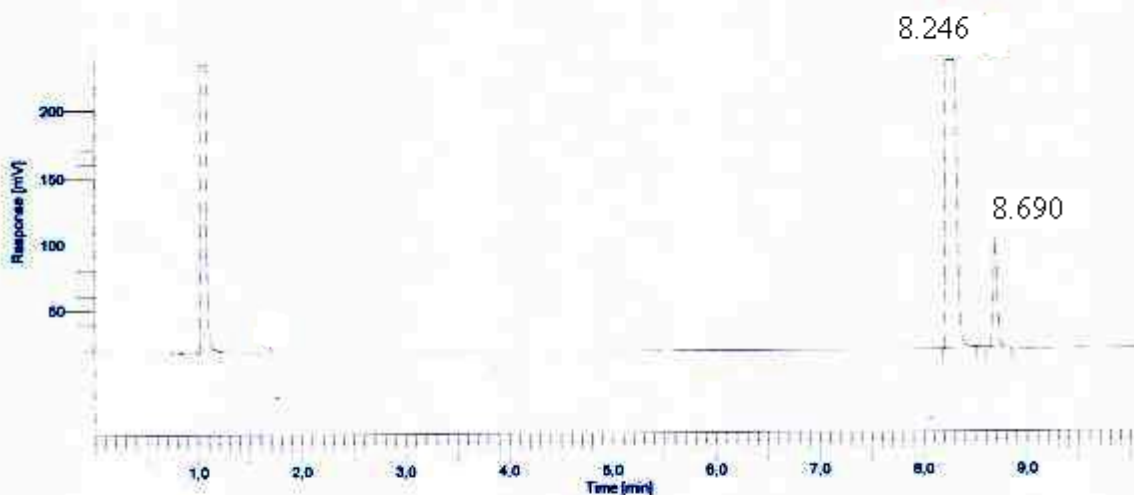

DEFAULT REPORT

| Peak # | Component Name | Time [min] | Area [uV*sec] | Height [uV] | Area [%] |
|--------|----------------|------------|---------------|-------------|----------|
| 1      |                | 8,246      | 2910594,09    | 644336,89   | 93,37    |
| 2      |                | 8,690      | 206567,42     | 68883,30    | 6,63     |
|        |                |            | 3117162,41    | 713220,19   | 100,00   |

Missing Component Report  
 Component Expected Retention (Calibration File)

All components were found

15.18 2-(4-Nitrophenyl)-2-phenylaminoacetonitrile (21n), obtained at -20°C in the presence of catalyst 3b

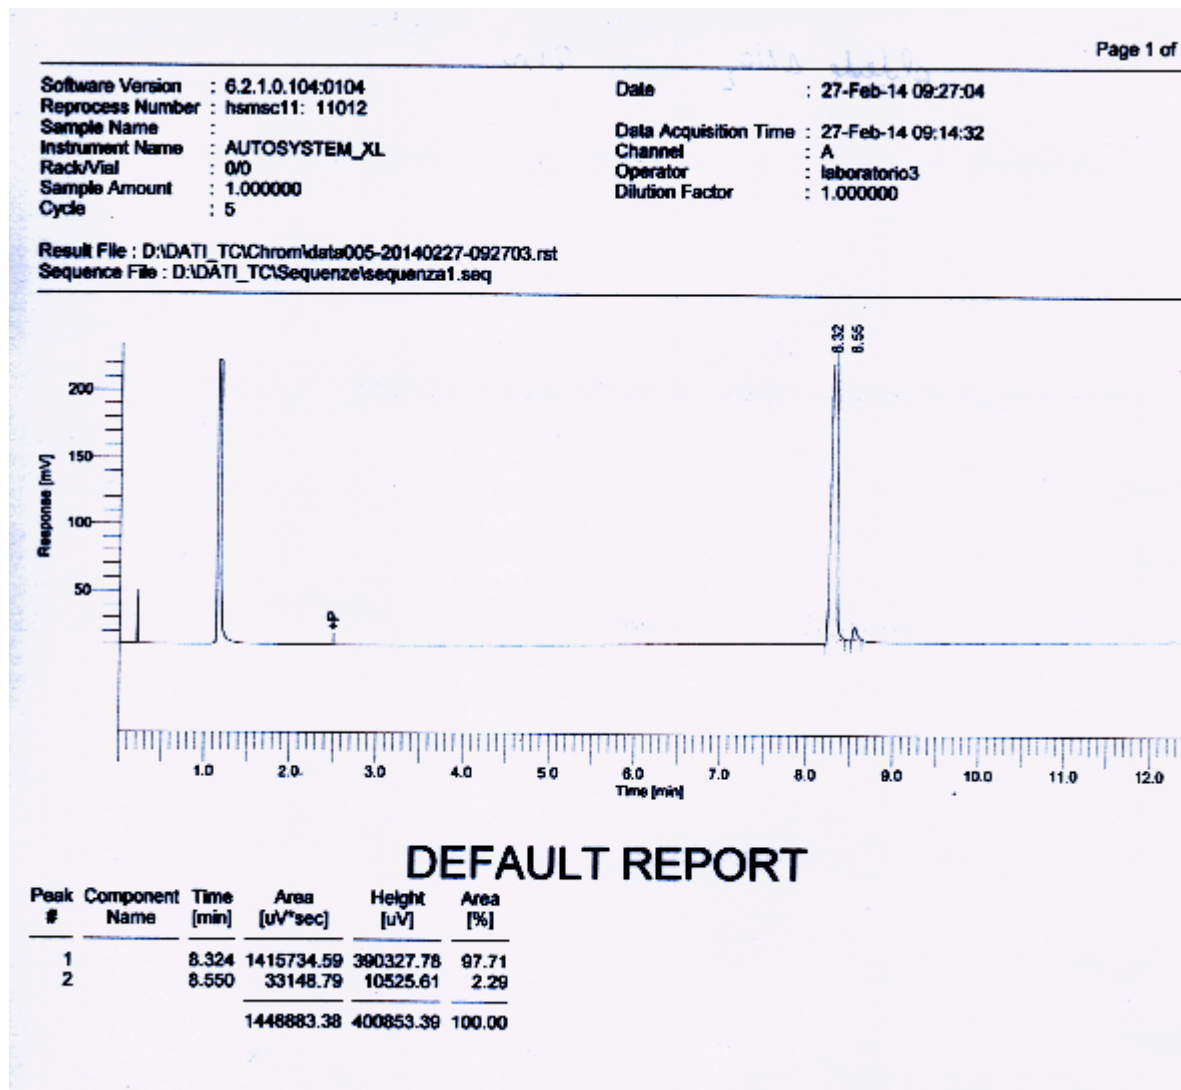



15.19 2-Phenylamino-2-(4-tolyl)acetonitrile (21o), obtained at -20°C in the presence of catalyst 3b

Software Version : 6.2.1.0.104:0104  
 Reprocess Number : hmsc11: 11021  
 Sample Name :  
 Instrument Name : AUTOSYSTEM\_XL  
 Rack/Vial : 00  
 Sample Amount : 1.000000  
 Cycle : 14  
 Date : 27-Feb-14 11:53:09  
 Data Acquisition Time : 27-Feb-14 11:39:41  
 Channel : A  
 Operator : laboratorio3  
 Dilution Factor : 1.000000

Result File : D:\DATI\_TC\Chrom\data014-20140227-115309.rst  
 Sequence File : D:\DATI\_TC\Sequenzelsequenza1.seq

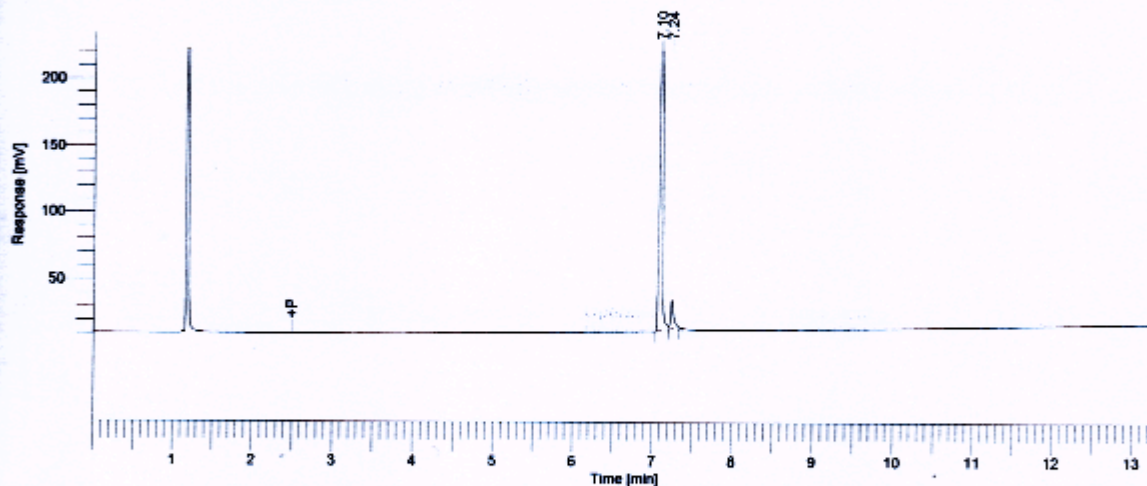

DEFAULT REPORT

| Peak # | Component Name | Time [min] | Area [uV*sec] | Height [uV] | Area [%] |
|--------|----------------|------------|---------------|-------------|----------|
| 1      |                | 7.104      | 910540.75     | 431485.24   | 94.28    |
| 2      |                | 7.242      | 55239.60      | 21148.08    | 5.72     |
|        |                |            | 965780.35     | 452633.32   | 100.00   |

15.20 2-Phenylamino-2-thienylacetonitrile (21p), obtained at -20°C in the presence of catalyst 3b

Software Version : 6.2.1.0.104:0104  
 Reprocess Number : hsmc11: 11024  
 Sample Name :  
 Instrument Name : AUTOSYSTEM\_XL  
 Rack/Vial : 0/0  
 Sample Amount : 1,000000  
 Cycle : 3

Date : 11/03/2014 15.30.30  
 Data Acquisition Time : 11/03/2014 15.10.16  
 Channel : A  
 Operator : laboratorio3  
 Dilution Factor : 1,000000

Result File : D:\DATI\_TC\Chrom\data003-20140311-153029.rst  
 Sequence File : D:\DATI\_TC\Sequenze\sequenza1.seq

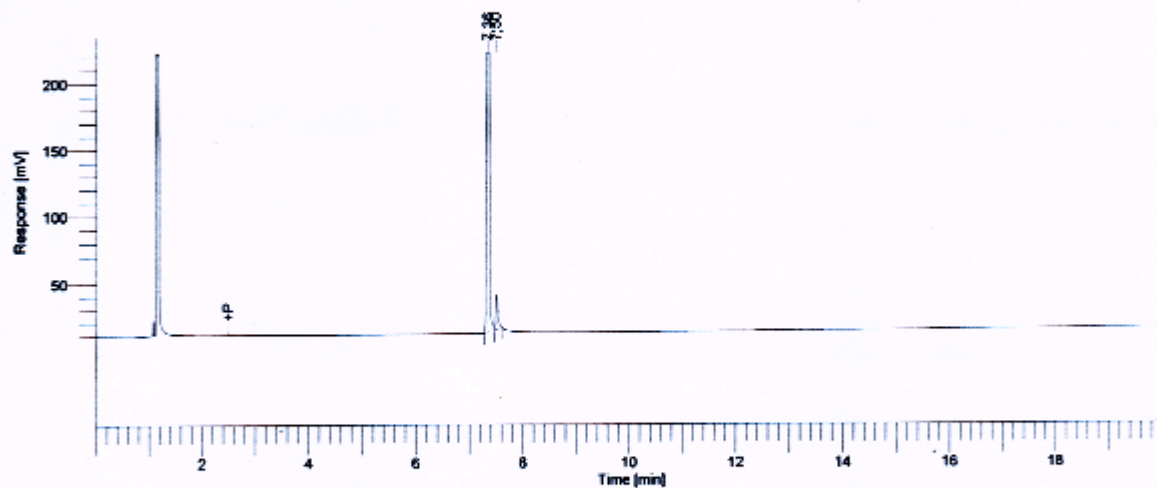

### DEFAULT REPORT

| Peak # | Component Name | Time [min] | Area [uV*sec] | Height [uV] | Area [%] |
|--------|----------------|------------|---------------|-------------|----------|
| 1      |                | 7,355      | 1369715,19    | 517026,66   | 94,85    |
| 2      |                | 7,501      | 77393,72      | 27198,32    | 5,35     |
|        |                |            | 1447108,92    | 544224,98   | 100,00   |
